# Supplementary material for: Proteomics of Nasonia vitripennis and the effects of native Wolbachia infection on N. vitripennis
Source: PeerJ. 2018 May 28;6:e4905. doi: 10.7717/peerj.4905 (PMC5978391; doi:10.7717/peerj.4905)
Supplement: Supplemental Information 4 [file peerj-06-4905-s004.xlsx]

## Sheet: Proteins
Accession	Description	MW [kDa]	calc. pI	Coverage	Proteins	Unique Peptides	A_113/REF	A_115/REF	A_117/REF	average A/REF	B_114/REF	B_116/REF	B_118/REF	averageB/REF	B/A	T TEST
645031570	PREDICTED: E3 ubiquitin-protein ligase MARCH5-like isoform X2 [Nasonia vitripennis]	42.8145	7.32764	6.56	2	2	1.09098	1.07252	1.06474	1.07608	0.947652	0.953356	0.942224	0.947744	0.88074	0.000107952
644992473	PREDICTED: uncharacterized protein LOC103315494 [Nasonia vitripennis]	20.3703	6.53662	25.7	1	5	0.623163	0.592951	0.662794	0.626302	1.2044	1.36436	1.30208	1.29028	2.06015	0.000197136
644995323	PREDICTED: 26S proteasome non-ATPase regulatory subunit 8-like [Nasonia vitripennis]	30.3526	5.52881	35.85	1	8	1.00742	1.0082	1.0104	1.00867	0.989197	0.991986	0.988153	0.989779	0.981269	0.00020058
156544652	PREDICTED: 85/88 kDa calcium-independent phospholipase A2-like [Nasonia vitripennis]	87.6809	6.53662	2.77	1	1	0.906113	0.930533	0.880741	0.905796	1.09273	1.09644	1.0855	1.09156	1.20508	0.000227522
239048037	venom protein V precursor [Nasonia vitripennis]	17.3559	6.59521	58.94	1	6	0.77738	0.866216	0.84891	0.830835	1.16999	1.17117	1.11462	1.15193	1.38647	0.000622879
238859625	serine protease 33 precursor [Nasonia vitripennis]	31.8629	5.26221	40.56	1	9	0.81015	0.827052	0.872098	0.836433	1.22125	1.19226	1.11852	1.17734	1.40758	0.000674092
645027611	PREDICTED: serine/threonine-protein phosphatase 5 isoform X2 [Nasonia vitripennis]	56.087	6.62451	13.06	2	5	0.961439	0.967007	0.964474	0.964306	1.0494	1.02774	1.0573	1.04481	1.08349	0.000856756
645027109	PREDICTED: alcohol dehydrogenase class-3 [Nasonia vitripennis]	40.4634	7.21045	31.3	1	10	0.774094	0.839864	0.831822	0.81526	1.09975	1.15236	1.21059	1.15423	1.41578	0.00088445
156551149	PREDICTED: neuromodulin [Nasonia vitripennis]	13.6139	9.5249	15.7	1	2	0.904298	0.943967	0.956836	0.935034	1.06911	1.05272	1.06197	1.06127	1.13501	0.00157096
645038835	PREDICTED: glutamic acid-rich protein-like [Nasonia vitripennis]	65.0826	9.08545	3.84	1	2	0.767404	0.825549	0.870332	0.821095	1.23352	1.11724	1.14705	1.16593	1.41998	0.00167555
645042578	PREDICTED: chitotriosidase-1-like, partial [Nasonia vitripennis]	34.7579	5.36377	8.39	3	2	1.19981	1.12623	1.27233	1.19946	0.846531	0.754529	0.894893	0.831984	0.693634	0.00337135
645016523	PREDICTED: fructose-1,6-bisphosphatase 1 [Nasonia vitripennis]	36.8798	7.6792	47.63	1	12	1.02929	1.04419	1.0577	1.04373	0.961769	0.980056	0.987782	0.976536	0.935625	0.00396057
239735550	carboxylesterase clade B, member 2 precursor [Nasonia vitripennis]	64.9531	6.80029	12.99	1	7	0.809003	0.756422	0.930784	0.83207	1.13957	1.13902	1.19985	1.15948	1.39349	0.00411519
156550243	PREDICTED: uncharacterized protein LOC100118177 [Nasonia vitripennis]	95.9532	7.38623	8.91	1	6	1.07916	1.03486	1.05245	1.05549	0.925903	0.960827	0.972507	0.953079	0.902971	0.00575467
345485039	PREDICTED: uncharacterized protein LOC100678792 [Nasonia vitripennis]	37.5976	8.08936	3.07	1	1	0.486512	0.723305	0.643803	0.617873	1.08859	1.47242	1.4337	1.33157	2.15509	0.00707283
645011673	PREDICTED: protein lingerer isoform X5 [Nasonia vitripennis]	116.889	8.11865	7.01	5	7	0.987674	0.981742	0.943676	0.971031	1.05508	1.03153	1.05449	1.04703	1.07827	0.00861384
644992343	PREDICTED: probable proline--tRNA ligase, mitochondrial isoform X2 [Nasonia vitripennis]	44.8876	8.47021	9.98	2	2	1.03316	1.04285	1.05403	1.04335	0.975593	0.988823	0.940312	0.968243	0.928017	0.00872037
345487828	PREDICTED: polyamine-modulated factor 1-binding protein 1-like [Nasonia vitripennis]	17.8085	9.5542	30.52	1	4	0.914303	0.812841	0.89888	0.875342	1.04526	1.16874	1.09536	1.10312	1.26021	0.00885269
645039329	PREDICTED: dihydroorotate dehydrogenase (quinone), mitochondrial [Nasonia vitripennis]	43.214	9.02686	16.04	1	4	0.980436	0.962971	0.976372	0.973259	1.04885	1.01165	1.03	1.03017	1.05847	0.0089374
156544032	PREDICTED: hydroxyacid oxidase 1 [Nasonia vitripennis]	40.5241	9.12939	7.38	2	2	1.14422	1.04393	1.15913	1.11576	0.947047	0.914095	0.862733	0.907958	0.813758	0.0089407
645027129	PREDICTED: poly(U)-specific endoribonuclease homolog isoform X2 [Nasonia vitripennis]	76.6533	7.38623	7	2	4	0.964553	0.966238	0.975684	0.968825	1.00303	1.02534	1.04141	1.02326	1.05618	0.00951505
645026174	PREDICTED: protein henna isoform X2 [Nasonia vitripennis]	51.3258	6.354	44.22	2	16	1.15662	1.03822	1.11095	1.10193	0.919807	0.949162	0.880329	0.916433	0.831662	0.00960774
345482285	PREDICTED: V-type proton ATPase subunit E [Nasonia vitripennis]	26.1179	8.06006	57.08	1	13	1.00953	1.01176	1.02436	1.01522	0.993485	0.995878	0.992651	0.994005	0.979107	0.0108573
645035666	PREDICTED: acyl-coenzyme A thioesterase 13 [Nasonia vitripennis]	14.928	8.77783	21.28	1	3	1.18827	1.07157	1.08006	1.1133	0.955298	0.880343	0.920053	0.918565	0.825083	0.0108943
645004618	PREDICTED: carboxypeptidase N subunit 2-like [Nasonia vitripennis]	78.1424	7.44482	22.19	1	12	1.02603	1.04344	1.02277	1.03075	0.982239	1.00274	0.988424	0.991136	0.961571	0.0109541
645007036	PREDICTED: sorting nexin-2 [Nasonia vitripennis]	51.5248	5.23682	16.45	1	8	0.964737	0.986346	0.958338	0.969807	1.01058	1.02852	1.04668	1.0286	1.06062	0.0119019
288856324	cytochrome c oxidase subunit 6A1, mitochondrial [Nasonia vitripennis]	12.1342	9.18799	32.69	2	3	1.01689	1.01651	1.06377	1.03239	0.952066	0.967171	0.93114	0.950126	0.920316	0.0120221
645034284	PREDICTED: antichymotrypsin-2 isoform X16 [Nasonia vitripennis]	42.748	5.5415	51.03	13	1	1.08498	1.01886	1.047	1.05028	0.936282	0.970574	0.961257	0.956038	0.910269	0.0122652
156552724	PREDICTED: endothelin-converting enzyme 1-like [Nasonia vitripennis]	90.2656	5.70654	15.86	1	2	0.871057	0.73158	0.847144	0.816594	1.09241	1.29447	1.08964	1.15884	1.41911	0.0130522
645006777	PREDICTED: LOW QUALITY PROTEIN: diacylglycerol kinase theta [Nasonia vitripennis]	115.499	6.62451	3.08	1	3	1.04741	1.00921	1.02634	1.02766	0.985867	0.968776	0.973196	0.975946	0.949683	0.0131928
156551475	PREDICTED: uncharacterized protein LOC100121395 [Nasonia vitripennis]	14.7419	8.77783	14.07	1	1	1.11367	1.06328	1.18017	1.11904	0.956759	0.865595	0.959155	0.92717	0.82854	0.0137752
645003796	PREDICTED: myosin heavy chain, muscle isoform X7 [Nasonia vitripennis]	224.468	6.13818	67.99	7	2	0.990914	0.891293	0.944751	0.942319	1.06004	1.05925	1.07611	1.06513	1.13033	0.0137937
156540800	PREDICTED: trypsin beta [Nasonia vitripennis]	35.2213	4.729	16.98	1	5	0.80361	0.717098	0.959407	0.826705	1.12347	1.11553	1.21023	1.14974	1.39075	0.0138145
345490385	PREDICTED: calumenin [Nasonia vitripennis]	42.4567	4.85596	30.03	1	8	0.965991	0.990859	0.92791	0.961587	1.03679	1.03527	1.0545	1.04219	1.08382	0.0140039
156548535	PREDICTED: thioredoxin, mitochondrial-like [Nasonia vitripennis]	15.2691	9.01221	51.82	3	5	1.00493	0.998288	0.999225	1.00082	0.963802	0.984911	0.964473	0.971062	0.970271	0.0146824
156537721	PREDICTED: probable phenylalanine--tRNA ligase alpha subunit isoform X1 [Nasonia vitripennis]	79.7922	6.72705	11.25	2	6	0.941179	0.999286	0.921138	0.953867	1.03576	1.07307	1.08329	1.06404	1.1155	0.0161003
345496515	PREDICTED: LOW QUALITY PROTEIN: esterase B1-like [Nasonia vitripennis]	60.2095	8.17725	7.17	1	2	1.10592	1.02957	1.12425	1.08658	0.901347	0.923597	0.982712	0.935885	0.861314	0.016333
268607518	eukaryotic translation initiation factor 4 gamma [Nasonia vitripennis]	129.111	7.2251	25.38	1	24	0.983237	0.976463	0.929087	0.962929	1.02232	1.04211	1.0402	1.03488	1.07472	0.016656
645026996	PREDICTED: neurobeachin isoform X5 [Nasonia vitripennis]	344.343	5.2749	0.88	5	2	1.05679	1.03379	1.06353	1.05137	0.997043	0.963816	0.924296	0.961718	0.91473	0.017253
156537411	PREDICTED: twinfilin isoform X2 [Nasonia vitripennis]	39.0601	6.72705	22.77	2	5	1.06625	1.04518	1.04208	1.05117	0.986153	0.957939	1.0115	0.985198	0.937239	0.0186434
644993260	PREDICTED: serine/arginine repetitive matrix protein 2 [Nasonia vitripennis]	144.179	8.49951	3.31	1	5	0.93798	0.941855	0.985154	0.954997	1.01425	1.00997	1.00511	1.00978	1.05736	0.0233959
645018197	PREDICTED: uncharacterized protein LOC100680003 [Nasonia vitripennis]	45.907	7.28369	9.98	1	4	1.16665	1.1118	1.01046	1.0963	0.927275	0.897509	0.952268	0.925684	0.844368	0.0243534
645009869	PREDICTED: uncharacterized protein LOC100119601 [Nasonia vitripennis]	48.7307	5.84619	6.59	1	3	0.964484	0.801872	0.849899	0.872085	1.23163	1.07208	1.06922	1.12431	1.28922	0.0249972
289629282	ferritin precursor [Nasonia vitripennis]	24.0784	5.65576	56.28	1	10	1.04835	1.09105	1.0044	1.04793	0.959719	0.938244	0.967878	0.95528	0.911587	0.0250739
156554004	PREDICTED: uncharacterized protein LOC100119759 [Nasonia vitripennis]	5.98774	9.46631	18.18	1	1	0.463317	0.346423	0.343716	0.384485	2.23287	1.12682	1.35106	1.57025	4.08402	0.0251486
644997766	PREDICTED: serine proteinase stubble-like [Nasonia vitripennis]	105.858	6.31592	5.34	1	2	1.17045	1.02535	1.07392	1.08991	0.961124	0.922611	0.916772	0.933503	0.856496	0.0251956
645000715	PREDICTED: dynamin-1-like protein [Nasonia vitripennis]	77.0821	6.99072	30.57	1	16	1.02713	1.00977	1.02872	1.02188	0.999439	0.964063	0.964466	0.975989	0.955096	0.0254566
345479361	PREDICTED: succinyl-CoA:3-ketoacid coenzyme A transferase 1, mitochondrial [Nasonia vitripennis]	58.4797	6.94678	49.91	1	17	1.00866	1.02228	1.02386	1.01827	0.985836	1.00269	0.979568	0.989364	0.971617	0.0265061
288856351	NADH dehydrogenase [ubiquinone] 1 beta subcomplex subunit 4 [Nasonia vitripennis]	14.5776	9.87646	40.5	1	4	1.07509	1.03846	1.0801	1.06455	0.991701	0.910216	0.988711	0.963542	0.905119	0.027347
156546054	PREDICTED: uncharacterized protein LOC100115973 [Nasonia vitripennis]	14.551	5.68115	32.84	2	4	0.873188	0.992931	0.935032	0.933717	1.03235	1.0787	1.11296	1.07467	1.15096	0.0278281
644992448	PREDICTED: H/ACA ribonucleoprotein complex subunit 2-like protein [Nasonia vitripennis]	17.9244	8.57275	17.09	1	3	0.897612	0.979613	0.94479	0.940672	1.04795	1.01539	1.01872	1.02735	1.09215	0.0287085
645028755	PREDICTED: dnaJ homolog subfamily C member 17 [Nasonia vitripennis]	37.8605	8.04541	9.25	1	2	1.06582	1.03195	1.06793	1.05523	0.903849	0.977464	0.990267	0.957193	0.907091	0.0288002
156554560	PREDICTED: alcohol dehydrogenase-like [Nasonia vitripennis]	29.1534	7.97217	42.7	4	9	1.05158	1.05906	1.02607	1.04557	0.954949	0.967143	1.01267	0.978255	0.935617	0.029065
345488667	PREDICTED: trypsin-1-like [Nasonia vitripennis]	27.5689	6.85889	25.87	1	1	0.838481	0.903471	0.948407	0.896786	0.995561	1.10186	1.15117	1.08286	1.20749	0.0291601
645030032	PREDICTED: DEAD-box helicase Dbp80-like [Nasonia vitripennis]	54.3348	5.71924	9.02	1	3	0.90223	0.971366	0.957282	0.943626	1.01118	1.06241	1.02002	1.0312	1.09281	0.0293206
156537021	PREDICTED: integrin-linked protein kinase [Nasonia vitripennis]	50.4386	7.44482	15.81	1	7	1.05058	1.00264	1.04632	1.03318	0.982601	0.974704	0.986461	0.981255	0.949745	0.0297724
345492571	PREDICTED: uncharacterized protein LOC100679225 [Nasonia vitripennis]	12.44	8.70459	17.86	1	2	0.97986	1.26085	1.26755	1.16942	0.819432	0.897526	0.81901	0.845323	0.722855	0.0300434
645004567	PREDICTED: 40S ribosomal protein S21 [Nasonia vitripennis]	14.3111	8.38232	38.89	2	5	0.936608	0.966161	0.997747	0.966839	1.02935	1.0364	1.08837	1.05138	1.08744	0.0300543
645014155	PREDICTED: ras-related C3 botulinum toxin substrate 1 isoform X2 [Nasonia vitripennis]	21.8531	7.98682	9.23	3	2	1.10688	1.07238	1.02712	1.06879	0.982637	0.887442	0.967137	0.945739	0.884867	0.0303497
645005431	PREDICTED: ATP-dependent RNA helicase bel isoform X4 [Nasonia vitripennis]	76.3666	7.82568	35.71	5	20	0.966093	0.995506	0.963884	0.975161	1.01003	1.03917	1.01242	1.02054	1.04653	0.0304408
645027949	PREDICTED: septin-7 isoform X2 [Nasonia vitripennis]	76.7953	8.71924	2.63	1	2	1.00409	0.980168	0.978957	0.987739	1.03013	1.00896	1.02449	1.02119	1.03387	0.0318531
345491277	PREDICTED: prohormone-3-like [Nasonia vitripennis]	24.4471	6.80029	16.67	1	3	1.06403	1.01527	1.01366	1.03099	0.961809	0.979108	0.920583	0.953833	0.925164	0.0323148
288856259	NADH dehydrogenase [ubiquinone] flavoprotein 2, mitochondrial [Nasonia vitripennis]	27.0665	7.63525	42.39	1	10	1.08742	1.00947	1.0518	1.04957	0.986958	0.95969	0.971706	0.972785	0.926844	0.0323918
645014874	PREDICTED: ADP-ribosylation factor GTPase-activating protein 2 [Nasonia vitripennis]	61.726	6.68311	11.47	1	6	0.929421	0.990912	0.927773	0.949369	1.00205	1.05881	1.06323	1.04136	1.0969	0.0324891
156554908	PREDICTED: ribosomal L1 domain-containing protein CG13096-like [Nasonia vitripennis]	66.0752	9.90576	2.74	1	2	0.981947	0.977514	0.926144	0.961868	1.0767	1.03813	1.01504	1.04329	1.08465	0.0326446
156546540	PREDICTED: cytochrome b5-like [Nasonia vitripennis]	14.9254	4.91943	54.48	1	5	0.988035	1.20007	1.15101	1.11304	0.880991	0.878103	0.937422	0.898839	0.807555	0.0328933
289177071	carboxylesterase clade A, member 4 [Nasonia vitripennis]	60.807	7.07861	20.48	1	10	0.814514	0.862492	0.838554	0.83852	1.32972	1.09954	1.00877	1.14601	1.36671	0.0333475
645030933	PREDICTED: choline O-acetyltransferase isoform X3 [Nasonia vitripennis]	69.9402	6.72705	10.23	3	6	1.08104	1.00781	1.03884	1.04256	0.972433	0.914745	0.96975	0.95231	0.913433	0.0334266
645031168	PREDICTED: translation initiation factor eIF-2B subunit delta isoform X2 [Nasonia vitripennis]	56.9426	9.56885	4.08	2	2	0.946554	0.977122	0.989343	0.971006	1.0153	1.01873	1.05872	1.03092	1.0617	0.0337116
345479191	PREDICTED: vanin-like protein 1 isoform X2 [Nasonia vitripennis]	60.6062	5.5542	10.7	2	5	0.911532	0.934667	0.991804	0.946001	1.02496	1.05337	1.12788	1.06874	1.12974	0.0342573
156547425	PREDICTED: proteasome subunit beta type-1 [Nasonia vitripennis]	26.3342	6.12549	33.9	1	5	1.04183	1.02481	1.00581	1.02415	0.9984	0.963141	0.974452	0.978664	0.955586	0.0364597
645037066	PREDICTED: CAD protein isoform X2 [Nasonia vitripennis]	152.072	6.43018	9.93	3	12	0.977508	0.974784	0.989005	0.980432	1.06308	1.03857	1.00379	1.03515	1.05581	0.036816
645003714	PREDICTED: ATP-dependent helicase brm-like isoform X5 [Nasonia vitripennis]	230.182	9.02686	0.42	1	1	0.948392	0.926881	0.859675	0.91165	1.05251	1.02633	1.19327	1.0907	1.1964	0.0372837
156549776	PREDICTED: gamma-taxilin-like [Nasonia vitripennis]	69.8369	5.89697	2.95	1	1	0.910975	0.916411	0.979656	0.935681	0.997195	1.06805	1.11449	1.05991	1.13277	0.0376837
156550729	PREDICTED: sterol O-acyltransferase 1 [Nasonia vitripennis]	62.0398	8.38232	5.82	1	2	0.989971	0.896435	0.981709	0.956039	1.03225	1.12588	1.07857	1.0789	1.12851	0.0380851
156549054	PREDICTED: alanine--glyoxylate aminotransferase 2, mitochondrial [Nasonia vitripennis]	54.3464	8.45557	17.51	1	7	1.13782	1.09576	1.00945	1.08101	0.980234	0.889179	0.950378	0.93993	0.869495	0.0381976
645009872	PREDICTED: uncharacterized protein LOC100119642 isoform X1 [Nasonia vitripennis]	48.4777	6.32861	14.66	1	4	1.12243	1.05771	1.00069	1.06028	0.95118	0.941451	0.962361	0.951664	0.897563	0.0382646
254910945	actin related protein 1 [Nasonia vitripennis]	41.7808	5.47803	70.48	7	5	1.04999	1.00487	1.01956	1.02481	0.983379	0.979427	0.988784	0.983863	0.960047	0.0392064
345485911	PREDICTED: 1,5-anhydro-D-fructose reductase-like [Nasonia vitripennis]	35.243	7.41553	38.46	1	9	0.983509	0.863973	0.967996	0.938493	1.04325	1.05109	1.06566	1.05333	1.12237	0.0393796
156537789	PREDICTED: U2 small nuclear ribonucleoprotein auxiliary factor 35 kDa subunit-related protein 2-like [Nasonia vitripennis]	86.1551	10.4038	0.97	1	1	0.955931	0.977028	0.824515	0.919158	1.10848	1.10032	1.03189	1.08023	1.17524	0.0396043
644997799	PREDICTED: putative fatty acyl-CoA reductase CG5065 isoform X2 [Nasonia vitripennis]	61.2807	8.29443	7.55	2	4	0.961381	1.00126	0.947095	0.969911	1.02586	1.01617	1.01612	1.01938	1.05101	0.0402069
645009234	PREDICTED: uncharacterized protein C2orf47 homolog, mitochondrial [Nasonia vitripennis]	29.9456	9.1001	25.19	1	5	0.929232	0.961636	0.993455	0.961441	1.02948	1.02198	1.00798	1.01981	1.06071	0.0406925
156550632	PREDICTED: gamma-interferon-inducible lysosomal thiol reductase-like [Nasonia vitripennis]	23.9851	7.82568	15.45	1	2	1.13007	1.13032	0.997479	1.08596	0.956233	0.877093	0.961166	0.931497	0.857764	0.0410191
645032597	PREDICTED: cullin-associated NEDD8-dissociated protein 1 isoform X2 [Nasonia vitripennis]	136.736	5.75732	41.33	2	41	0.955749	1.00547	0.979329	0.980183	1.0278	1.02908	1.01645	1.02445	1.04516	0.0411998
645004322	PREDICTED: mitochondrial import inner membrane translocase subunit Tim10 B-like isoform X2 [Nasonia vitripennis]	10.8422	5.19873	30.85	2	2	1.04086	1.02041	1.07194	1.0444	1.005	0.932174	0.966031	0.967733	0.92659	0.0412087
289684215	serine protease homolog 103 precursor [Nasonia vitripennis]	30.7744	8.19189	2.84	1	1	1.02737	1.06031	1.1472	1.07829	0.998086	0.911682	0.930813	0.94686	0.87811	0.0413162
645017078	PREDICTED: omega-conotoxin-like protein 1 [Nasonia vitripennis]	8.98969	9.18799	35.8	1	3	1.02906	1.03322	1.03075	1.03101	0.96143	1.00215	1.00456	0.989378	0.959619	0.0413642
645020856	PREDICTED: neurocalcin homolog isoform X1 [Nasonia vitripennis]	21.9848	5.24951	26.56	2	5	1.02375	1.01212	1.05648	1.03078	0.983833	0.982104	0.999787	0.988575	0.959053	0.0429661
645007275	PREDICTED: phosphoacetylglucosamine mutase isoform X3 [Nasonia vitripennis]	60.1401	6.37939	34.85	1	15	1.01657	1.01957	1.02553	1.02056	0.981909	1.00095	0.95198	0.978281	0.958577	0.0433881
345497168	PREDICTED: programmed cell death 6-interacting protein-like [Nasonia vitripennis]	14.7167	4.64014	26.72	1	2	0.878433	0.959886	0.920415	0.919578	1.08844	1.14399	0.983949	1.07213	1.16589	0.0438151
644998692	PREDICTED: WW domain-binding protein 2 isoform X3 [Nasonia vitripennis]	31.2587	8.30908	7.02	3	2	0.991162	1.06495	1.08019	1.04543	0.945658	0.984362	0.925802	0.951941	0.910571	0.0448586
645017586	PREDICTED: uncharacterized protein LOC100679170 [Nasonia vitripennis]	14.3273	8.96826	11.02	1	2	0.911401	0.845672	0.990979	0.916018	1.12103	1.03461	1.03371	1.06312	1.16058	0.0448774
645041276	PREDICTED: calmodulin-like protein 1 [Nasonia vitripennis]	29.9356	4.76709	13.28	1	3	1.03361	0.987767	1.06657	1.02931	0.973826	0.948481	0.95797	0.960093	0.932749	0.0449028
645005765	PREDICTED: alcohol dehydrogenase-like [Nasonia vitripennis]	29.2312	6.45557	45.49	1	9	0.978372	1.18822	1.13987	1.10215	0.876997	0.920446	0.939429	0.912291	0.827734	0.0453242
644993208	PREDICTED: uncharacterized protein LOC100463238 [Nasonia vitripennis]	84.6892	8.25049	2.69	1	2	1.14107	1.01124	1.04059	1.0643	0.915473	0.978594	0.884901	0.926323	0.870359	0.0453261
644994727	PREDICTED: neurexin-4 [Nasonia vitripennis]	143.033	5.90967	5.67	1	6	1.06643	1.04104	1.06863	1.0587	1.00094	0.976364	0.883221	0.953508	0.900639	0.0464643
644997601	PREDICTED: RNA-binding protein 26 isoform X4 [Nasonia vitripennis]	108.262	9.65674	1.03	4	1	1.02246	0.915647	0.925576	0.954562	1.06023	1.04631	1.04962	1.05205	1.10213	0.0468715
644995849	PREDICTED: protein kinase C and casein kinase substrate in neurons protein 1 isoform X3 [Nasonia vitripennis]	51.7752	5.61768	11.11	4	5	1.02484	1.05212	1.00493	1.0273	0.996751	0.982338	0.975087	0.984726	0.958561	0.0477434
156546630	PREDICTED: venom serine carboxypeptidase isoform X2 [Nasonia vitripennis]	53.2988	6.21436	10.52	1	2	1.09662	1.00711	1.08169	1.06181	0.977362	0.970405	0.99626	0.981343	0.924218	0.0488344
156552448	PREDICTED: uncharacterized protein LOC100116599 [Nasonia vitripennis]	48.0949	5.57959	33.74	2	14	0.880116	0.962331	0.981166	0.941204	1.0163	1.03037	1.07287	1.03985	1.1048	0.0494008
156546466	PREDICTED: uncharacterized protein LOC100123649 [Nasonia vitripennis]	116.464	5.43994	13.03	1	11	0.963371	0.964579	0.991514	0.973154	1.00319	1.00627	1.04461	1.01802	1.04611	0.0502216
156547233	PREDICTED: mitotic spindle assembly checkpoint protein MAD2A-like [Nasonia vitripennis]	22.7717	7.37158	8.42	1	1	0.967786	0.987072	0.99612	0.983659	1.03829	1.03096	1.00017	1.02314	1.04013	0.0514077
645011257	PREDICTED: splicing factor 3A subunit 1-like [Nasonia vitripennis]	85.7264	5.78271	6.44	2	3	0.992418	0.987467	0.967489	0.982458	1.00379	1.05612	1.02714	1.02902	1.04739	0.0514912
156551299	PREDICTED: fatty acyl-CoA reductase 1-like [Nasonia vitripennis]	61.0736	7.72314	8.92	2	3	0.883442	1.01182	0.881719	0.925661	1.09828	1.12184	1.00967	1.07659	1.16305	0.0516116
156553460	PREDICTED: methylthioribose-1-phosphate isomerase [Nasonia vitripennis]	38.0279	6.75635	36	1	9	1.08148	1.16035	1.14521	1.12902	0.95672	0.985176	0.715102	0.885666	0.784458	0.052245
645016427	PREDICTED: serine/threonine-protein kinase MST4 isoform X4 [Nasonia vitripennis]	66.0633	7.12256	2.58	4	1	0.99343	0.962267	0.890074	0.94859	1.09843	1.00966	1.06639	1.05816	1.11551	0.0524281
156545932	PREDICTED: B1 protein [Nasonia vitripennis]	14.5364	6.97607	64.18	1	8	1.01743	1.08519	1.01689	1.03984	0.948012	0.92693	0.995576	0.956839	0.920179	0.0526111
268370128	NADH dehydrogenase [ubiquinone] 1 alpha subcomplex subunit 10, mitochondrial [Nasonia vitripennis]	49.5168	6.59521	37.38	1	16	1.00218	1.03007	1.0657	1.03265	0.987084	0.983478	0.973318	0.981293	0.950266	0.0526661
645004771	PREDICTED: LOW QUALITY PROTEIN: uncharacterized protein LOC100116128 [Nasonia vitripennis]	1794.94	5.2876	0.27	1	4	1.21044	1.02409	1.04877	1.09443	0.879832	0.950898	0.941723	0.924151	0.84441	0.0528687
156538338	PREDICTED: serine/threonine-protein phosphatase PP1-beta catalytic subunit [Nasonia vitripennis]	37.4847	6.18896	46.81	1	7	1.03428	1.01261	1.01741	1.02143	0.962384	1.00395	0.986257	0.984195	0.963542	0.0532894
644994437	PREDICTED: guanine nucleotide exchange factor MSS4 homolog [Nasonia vitripennis]	14.0069	5.8335	9.68	1	1	0.971899	0.855698	0.994463	0.940687	1.09264	1.0422	1.0572	1.06401	1.1311	0.0535665
156538601	PREDICTED: uncharacterized family 31 glucosidase KIAA1161 [Nasonia vitripennis]	74.7971	6.59521	17.18	1	12	0.967933	0.983686	0.996585	0.982735	1.03347	1.02746	0.998284	1.01974	1.03766	0.0536477
289177125	cytochrome P450 4AB12 precursor [Nasonia vitripennis]	58.4575	7.97217	7.89	13	2	0.92639	0.898668	0.973679	0.932912	1.04926	1.13826	0.994641	1.06072	1.137	0.0537687
644992631	PREDICTED: heterogeneous nuclear ribonucleoprotein A1, A2/B1 homolog isoform X2 [Nasonia vitripennis]	37.1245	9.29053	30.14	3	9	0.980118	0.913851	0.940544	0.944838	0.996043	1.04776	1.1189	1.05424	1.11579	0.0539637
644995653	PREDICTED: venom protein F isoform X8 [Nasonia vitripennis]	141.52	8.04541	0.89	8	1	1.15318	1.01743	1.05064	1.07375	0.96174	0.977463	0.90164	0.946948	0.881906	0.0539969
645006411	PREDICTED: PRA1 family protein 3 [Nasonia vitripennis]	22.4383	9.89111	15.5	1	3	1.07331	1.03075	1.01392	1.03933	0.9536	0.969996	1.00562	0.976405	0.93946	0.0547961
289177004	glutathione S-transferase S2 [Nasonia vitripennis]	23.4013	8.47021	59.61	1	9	1.00738	1.01349	1.01443	1.01177	0.974058	1.00442	0.974633	0.984369	0.972918	0.0558619
345491344	PREDICTED: cysteine string protein isoform X2 [Nasonia vitripennis]	25.6122	5.46533	3.46	2	1	1.09618	1.0474	0.996305	1.04663	0.960016	0.980609	0.964132	0.968252	0.925116	0.0566433
239050434	small serine proteinase inhibitor-like venom protein precursor [Nasonia vitripennis]	8.60917	7.63525	26.25	1	2	0.829494	0.894384	0.874311	0.866063	1.31946	1.01121	1.05032	1.127	1.30129	0.0574783
645027982	PREDICTED: uncharacterized protein LOC100680390 [Nasonia vitripennis]	14.4732	7.34229	10.14	1	1	1.24679	1.01403	1.10155	1.12079	0.960752	0.82703	0.944272	0.910685	0.812538	0.0581506
644994345	PREDICTED: serine/threonine-protein phosphatase 2B catalytic subunit 2-like isoform X5 [Nasonia vitripennis]	58.8394	6.63916	21.11	5	9	1.04933	1.01931	1.01093	1.02652	1.00619	0.974722	0.976126	0.985681	0.960213	0.0582067
645007522	PREDICTED: GMP synthase [glutamine-hydrolyzing] [Nasonia vitripennis]	81.1278	6.94678	29.7	1	18	1.02815	1.04577	1.0031	1.02567	0.960527	1.00371	0.971518	0.978584	0.954089	0.0583257
645002692	PREDICTED: 4-hydroxyphenylpyruvate dioxygenase [Nasonia vitripennis]	43.7421	6.0874	68.42	1	19	1.01753	1.03732	1.1359	1.06358	0.994386	0.93873	0.912645	0.948587	0.891877	0.0585736
156548218	PREDICTED: signal recognition particle subunit SRP68 [Nasonia vitripennis]	64.9696	8.23584	23.99	1	12	0.996766	1.00198	0.954031	0.98426	1.01351	1.041	1.03429	1.0296	1.04607	0.058714
645005919	PREDICTED: uncharacterized protein LOC100120714 isoform X1 [Nasonia vitripennis]	82.7085	6.78564	26.79	4	18	0.980896	1.01283	0.974906	0.989543	1.03247	1.01635	1.01966	1.02283	1.03364	0.0594445
156548795	PREDICTED: cytosolic purine 5'-nucleotidase isoform X1 [Nasonia vitripennis]	73.3134	6.44287	20.79	3	12	1.03139	1.00343	1.10452	1.04644	0.960991	0.978257	0.960268	0.966505	0.923609	0.0598424
645010518	PREDICTED: putative elongator complex protein 1 [Nasonia vitripennis]	151.353	6.23975	5	1	5	0.963387	0.990106	0.994325	0.982606	1.05812	1.0091	1.01931	1.02884	1.04705	0.0601984
645004024	PREDICTED: uncharacterized protein LOC100123846 [Nasonia vitripennis]	154.119	8.85107	0.65	1	1	1.00555	0.967865	0.95268	0.975365	1.00552	1.03281	1.05818	1.03217	1.05824	0.0602035
156547453	PREDICTED: importin-4-like [Nasonia vitripennis]	121.73	4.80518	15.34	1	13	0.891319	0.977896	0.991894	0.953703	1.02962	1.03078	1.05232	1.03758	1.08794	0.0602936
345480475	PREDICTED: venom protease [Nasonia vitripennis]	39.903	8.20654	5.42	1	1	1.10367	1.04539	1.00957	1.05288	0.946024	1.0053	0.938828	0.963383	0.914999	0.0607849
345484693	PREDICTED: signal recognition particle receptor subunit alpha homolog isoform X2 [Nasonia vitripennis]	69.1921	8.25049	14.72	2	6	1.04905	1.00924	1.06182	1.04004	1.00052	0.959781	0.89641	0.952236	0.91558	0.0620499
645003062	PREDICTED: regulator of chromosome condensation [Nasonia vitripennis]	45.4213	6.7124	16.35	1	5	1.07069	1.00346	1.02985	1.03467	0.990621	0.923047	0.974155	0.962608	0.930355	0.0630653
645023793	PREDICTED: metalloendopeptidase OMA1, mitochondrial-like isoform X2 [Nasonia vitripennis]	30.6523	8.04541	10.37	2	2	1.22314	1.04798	1.01616	1.09576	0.947456	0.926674	0.917357	0.930496	0.849177	0.0636991
645019344	PREDICTED: formin-like protein 18 isoform X1 [Nasonia vitripennis]	21.0572	6.72705	9.38	1	2	0.910284	0.349183	0.586981	0.615482	1.3461	1.74377	0.93026	1.34004	2.17722	0.0642194
156555392	PREDICTED: GDP-mannose 4,6 dehydratase [Nasonia vitripennis]	40.0993	6.69775	3.37	1	1	1.32631	1.18263	1.00011	1.16968	1.00627	0.836441	0.762143	0.868286	0.742325	0.0642788
645003017	PREDICTED: digestive cysteine proteinase 1 [Nasonia vitripennis]	62.6383	6.93213	26.4	1	13	1.04395	1.12402	1.05106	1.07301	0.859799	1.01381	0.953092	0.942232	0.878123	0.0643046
283135218	fumarylacetoacetase [Nasonia vitripennis]	46.2251	6.59521	22.3	3	8	1.01724	1.03834	1.08513	1.04691	0.976461	1.00326	0.996817	0.992181	0.947726	0.0646265
645031650	PREDICTED: LOW QUALITY PROTEIN: protein bicaudal D-like [Nasonia vitripennis]	75.2819	5.5415	6.79	1	3	1.05176	1.0882	1.01282	1.05093	1.00971	0.910381	0.960439	0.960175	0.913647	0.0652791
645032260	PREDICTED: tudor domain-containing protein 7-like [Nasonia vitripennis]	109.137	5.56689	3.67	1	3	0.81981	0.995815	0.946366	0.920664	1.05818	1.08196	1.03208	1.05741	1.14853	0.0656434
645005872	PREDICTED: serine/threonine-protein phosphatase 6 catalytic subunit [Nasonia vitripennis]	34.6753	5.31299	10.23	1	3	0.901698	0.936691	0.982866	0.940418	0.981564	1.01763	1.0314	1.0102	1.0742	0.0661027
645039292	PREDICTED: uncharacterized protein LOC100121386 isoform X3 [Nasonia vitripennis]	133.471	5.5542	7.55	3	8	0.976508	0.987878	0.974153	0.979513	1.06837	1.03512	0.995767	1.03308	1.05469	0.0665862
645030602	PREDICTED: epimerase family protein SDR39U1 [Nasonia vitripennis]	29.6803	8.104	9.4	1	2	0.921791	0.967185	1.00007	0.963015	1.03927	1.09862	1.01006	1.04932	1.08962	0.0669196
645004447	PREDICTED: pre-mRNA-processing factor 40 homolog A isoform X2 [Nasonia vitripennis]	92.9968	8.89502	3.56	2	2	0.930338	0.990349	0.932176	0.950954	0.98137	1.07329	1.08709	1.04725	1.10126	0.0670984
645020912	PREDICTED: uncharacterized protein LOC100680229 [Nasonia vitripennis]	46.4059	4.94482	32.11	1	13	0.840771	0.910063	1.03107	0.9273	1.07823	1.04264	1.09055	1.07047	1.1544	0.0672687
156554769	PREDICTED: 60S ribosomal protein L19 isoform X2 [Nasonia vitripennis]	23.5952	11.2241	31	2	7	0.931485	0.959826	0.974072	0.955128	0.985978	1.01294	1.06638	1.02176	1.06977	0.0673078
345497242	PREDICTED: FK506-binding protein 2 isoform X2 [Nasonia vitripennis]	24.1079	4.91943	58.99	2	12	0.939689	0.992299	0.967981	0.966656	1.00241	1.00993	1.05566	1.02267	1.05795	0.0678239
645027420	PREDICTED: protein lethal(2)essential for life [Nasonia vitripennis]	19.1498	6.53662	57.99	1	8	0.875115	0.978417	0.980174	0.944569	1.11008	1.04328	1.0141	1.05582	1.11778	0.0682518
645030125	PREDICTED: zyxin-like isoform X1 [Nasonia vitripennis]	36.4123	9.15869	27.41	2	7	0.969992	0.998991	0.95483	0.974604	1.03103	1.06765	0.999778	1.03282	1.05973	0.0684552
644993718	PREDICTED: calcium/calmodulin-dependent protein kinase type 1 isoform X2 [Nasonia vitripennis]	41.6871	7.00537	21.77	1	1	1.25827	1.05036	1.08406	1.1309	1.01377	0.790708	0.911725	0.905402	0.800605	0.0686451
345496850	PREDICTED: conserved oligomeric Golgi complex subunit 3 [Nasonia vitripennis]	97.9446	6.50732	2.77	1	1	1.02986	1.03728	1.04743	1.03819	0.939574	0.980724	1.01952	0.979938	0.943891	0.0693525
645041919	PREDICTED: sarcolemmal membrane-associated protein, partial [Nasonia vitripennis]	54.0709	5.41455	3.18	1	1	0.95102	0.889729	0.998971	0.946574	1.12315	1.02949	1.02201	1.05822	1.11794	0.0696281
645000101	PREDICTED: deoxyhypusine hydroxylase [Nasonia vitripennis]	34.1536	5.05908	8.85	1	3	1.00535	0.979838	0.972449	0.98588	1.04989	1.00211	1.03192	1.02798	1.0427	0.0698911
345491707	PREDICTED: fumarylacetoacetate hydrolase domain-containing protein 2A [Nasonia vitripennis]	35.7757	8.47021	48.32	1	14	0.995741	1.04008	1.06278	1.03287	0.972465	0.986618	0.989933	0.983005	0.951724	0.0709061
645011883	PREDICTED: J domain-containing protein [Nasonia vitripennis]	20.528	6.53662	23.2	1	3	0.901553	0.966896	0.910721	0.92639	0.989108	1.13949	1.018	1.04887	1.13221	0.0719604
645021859	PREDICTED: fatty acid synthase-like [Nasonia vitripennis]	27.198	5.98584	12.4	1	3	0.988759	0.940405	0.909591	0.946252	1.11935	1.06301	0.985397	1.05592	1.1159	0.0720705
645008469	PREDICTED: glycine N-methyltransferase-like isoform X2 [Nasonia vitripennis]	33.511	6.3667	14.78	2	3	0.933199	0.988102	0.938606	0.953302	0.986296	1.09201	1.03775	1.03869	1.08957	0.0721403
645017758	PREDICTED: leucine-rich repeat-containing protein 32-like [Nasonia vitripennis]	109.618	6.20166	7.59	1	7	1.06556	1.00827	1.00607	1.02663	0.991642	0.97289	0.957957	0.974163	0.94889	0.0735757
345486832	PREDICTED: renin receptor [Nasonia vitripennis]	37.4253	5.77002	7.14	1	2	0.974055	1.32852	1.11277	1.13845	0.908044	0.85631	0.89753	0.887295	0.779389	0.073769
645036518	PREDICTED: ras-like GTP-binding protein Rho1 isoform X3 [Nasonia vitripennis]	21.5672	7.00537	46.88	4	7	1.04885	1.0085	1.0242	1.02718	1.0094	0.970139	0.983326	0.987622	0.961488	0.0741038
645025063	PREDICTED: uncharacterized protein LOC100679671 isoform X3 [Nasonia vitripennis]	25.0803	7.66455	40.59	2	1	1.13462	1.02199	1.05572	1.07077	0.984338	0.867751	0.990423	0.947504	0.884877	0.0768844
156548184	PREDICTED: receptor expression-enhancing protein 5-like [Nasonia vitripennis]	20.7511	8.83643	18.44	1	3	0.93735	0.980321	0.986569	0.96808	1.02633	0.994459	1.0109	1.01056	1.04388	0.0776555
300192927	CDKAL1-like protein [Nasonia vitripennis]	61.8341	7.89893	5.18	1	2	1.06698	1.10448	1.04359	1.07168	0.855487	0.947144	1.03145	0.944693	0.881505	0.07769
345497269	PREDICTED: uncharacterized protein LOC100116612 [Nasonia vitripennis]	32.2771	8.79248	31.67	1	9	0.953506	1.00154	1.0081	0.987715	1.02689	1.02305	1.05843	1.03612	1.04901	0.0779175
645037057	PREDICTED: 6-pyruvoyl tetrahydrobiopterin synthase [Nasonia vitripennis]	16.4862	6.52197	36.62	1	4	1.26906	1.44479	0.892063	1.20197	0.782423	0.833276	0.832696	0.816132	0.678996	0.0781821
229577294	tropomyosin 2 [Nasonia vitripennis]	33.0461	5.09717	51.41	2	19	1.04201	0.994614	1.0372	1.02461	0.991591	0.958138	0.991776	0.980502	0.956952	0.0784039
156555455	PREDICTED: aspartate--tRNA ligase, cytoplasmic [Nasonia vitripennis]	59.4066	6.90283	9.87	1	5	0.885619	1.02261	0.916515	0.94158	1.0154	1.10314	1.04949	1.05601	1.12153	0.0785958
268370142	uncharacterized protein LOC100313522 [Nasonia vitripennis]	17.2836	5.021	23.03	1	2	0.985058	1.14198	1.05972	1.06225	0.956558	0.972941	0.920843	0.950114	0.894431	0.0790954
645038053	PREDICTED: small glutamine-rich tetratricopeptide repeat-containing protein alpha [Nasonia vitripennis]	33.0879	5.07178	22.56	1	5	0.918431	1.0081	0.936664	0.954398	1.01943	1.02877	1.01006	1.01942	1.06813	0.0801187
345490916	PREDICTED: upstream activation factor subunit spp27 [Nasonia vitripennis]	29.589	5.84619	17.74	1	4	0.970139	0.886605	0.937026	0.931257	1.04479	0.97585	1.1327	1.05111	1.12871	0.0804007
645001531	PREDICTED: uncharacterized protein LOC103316646 [Nasonia vitripennis]	10.8336	4.88135	39	1	3	1.09202	0.97766	1.04914	1.03961	0.956466	0.942836	0.977434	0.958912	0.922379	0.0814808
345491309	PREDICTED: uncharacterized protein LOC100679629 isoform X2 [Nasonia vitripennis]	63.1556	5.47803	5.61	2	3	1.13105	0.991245	1.09682	1.07304	0.971653	0.968981	0.986353	0.975662	0.909252	0.0833439
156543632	PREDICTED: dihydropyrimidine dehydrogenase [NADP(+)] [Nasonia vitripennis]	111.005	7.56201	6.93	1	5	1.08482	0.99427	1.02328	1.03412	0.961555	0.975986	0.97779	0.971777	0.939711	0.0835525
288856261	NADH dehydrogenase [ubiquinone] iron-sulfur protein 3, mitochondrial [Nasonia vitripennis]	30.4975	6.43018	50	1	13	1.02601	1.00391	1.06669	1.0322	1.00291	0.981789	0.962377	0.982357	0.951708	0.0841379
156544506	PREDICTED: 28S ribosomal protein S36, mitochondrial-like [Nasonia vitripennis]	9.51116	10.6382	44.44	1	3	1.12686	1.03984	1.07468	1.08046	1.04229	0.859536	0.936883	0.946238	0.875774	0.0841424
645013830	PREDICTED: angiotensin-converting enzyme-like [Nasonia vitripennis]	84.2676	6.62451	3.94	1	3	0.89643	0.995184	0.981825	0.957813	1.02959	1.14047	1.03194	1.06733	1.11434	0.0842017
345498444	PREDICTED: poly(U)-specific endoribonuclease homolog [Nasonia vitripennis]	68.1119	9.5249	20.03	1	10	0.918718	0.953701	1.00116	0.957859	0.988515	1.06565	1.04704	1.03373	1.07921	0.0850959
645017436	PREDICTED: cGMP-dependent 3',5'-cyclic phosphodiesterase-like [Nasonia vitripennis]	81.2118	5.87158	4.35	1	2	0.970093	0.962994	0.985249	0.972778	1.07229	1.03065	0.987653	1.0302	1.05903	0.0857718
645011213	PREDICTED: phosphatidylinositol transfer protein alpha isoform [Nasonia vitripennis]	31.5019	6.13818	33.58	1	7	1.04827	1.04081	1.00119	1.03009	0.995523	0.992632	0.9346	0.974252	0.945792	0.0860957
156542554	PREDICTED: aminoacylase-1-like [Nasonia vitripennis]	45.3229	6.91748	30.42	1	10	0.960647	1.0115	0.966749	0.979631	1.0193	1.02243	1.0093	1.01701	1.03815	0.0863336
156540306	PREDICTED: DEAD-box helicase Dbp80 [Nasonia vitripennis]	53.5467	6.55127	11.55	1	4	0.913056	1.00358	0.996557	0.971066	1.01295	1.06501	1.06306	1.04701	1.0782	0.087306
645031895	PREDICTED: uncharacterized protein LOC100116411 isoform X2 [Nasonia vitripennis]	15.4437	6.29053	21.32	2	2	1.0178	0.907168	0.900214	0.941727	0.986596	1.10209	1.10323	1.06397	1.12981	0.0874865
289177207	cytochrome P450 9P4 [Nasonia vitripennis]	58.694	8.07471	2.37	1	1	1.03142	1.06059	1.20004	1.09735	0.986038	0.818275	0.979422	0.927912	0.845592	0.0885064
239050219	serine protease 16 precursor [Nasonia vitripennis]	41.1964	6.99072	36.72	1	12	0.905854	0.91943	1.02416	0.949816	1.03739	1.02101	1.04767	1.03536	1.09006	0.0885609
645003696	PREDICTED: NADH dehydrogenase [ubiquinone] 1 beta subcomplex subunit 11, mitochondrial [Nasonia vitripennis]	18.3084	7.25439	37.27	1	5	1.02334	1.00024	1.05739	1.02699	0.983388	0.912386	0.987279	0.961018	0.935759	0.0886887
156553731	PREDICTED: FAS-associated factor 1 [Nasonia vitripennis]	76.0703	4.93213	3.73	1	2	1.04187	1.01434	1.13633	1.06418	0.895359	0.977465	0.996198	0.956341	0.898667	0.0889047
156550047	PREDICTED: lysosomal protein NCU-G1-B-like [Nasonia vitripennis]	46.2563	6.46826	5.97	1	1	1.24315	0.943097	1.19986	1.1287	0.867553	0.866487	0.977556	0.903865	0.800799	0.0891821
156551816	PREDICTED: huntingtin-interacting protein K [Nasonia vitripennis]	13.3577	4.75439	13.45	1	2	0.887936	1.044	0.88772	0.939886	1.06589	1.04038	1.06635	1.05754	1.12518	0.0896181
156545944	PREDICTED: putative aminopeptidase W07G4.4 isoform X2 [Nasonia vitripennis]	56.5481	6.55127	43.92	2	22	1.05123	1.01038	1.02968	1.03043	0.980795	0.959349	1.01577	0.985305	0.956207	0.0896365
288856269	NADH dehydrogenase (ubiquinone) 1 beta subcomplex, 6, 17kDa [Nasonia vitripennis]	19.6328	9.5835	52.94	1	7	0.985473	1.04695	1.06062	1.03101	0.963833	0.995937	0.962348	0.974039	0.944739	0.0898432
645016657	PREDICTED: cullin-3 isoform X2 [Nasonia vitripennis]	90.1029	8.23584	7.62	2	5	1.03643	1.04967	0.991549	1.02588	0.992942	0.988713	0.965688	0.982448	0.957661	0.0900964
345488100	PREDICTED: probable salivary secreted peptide [Nasonia vitripennis]	14.5818	9.48096	13.53	1	2	0.832597	0.952124	1.00938	0.931367	1.09063	1.09752	1.00545	1.06453	1.14298	0.0903208
345496644	PREDICTED: uncharacterized protein LOC100679671 isoform X1 [Nasonia vitripennis]	25.8376	7.06396	42.28	2	1	1.17531	1.00078	1.08335	1.08648	0.957429	1.00407	0.863696	0.941733	0.866776	0.0904432
345497837	PREDICTED: short-chain dehydrogenase/reductase family 16C member 6-like isoform X2 [Nasonia vitripennis]	34.356	7.73779	15.51	2	4	1.12818	1.03786	1.02851	1.06485	0.968573	0.935527	1.02151	0.975203	0.915815	0.091053
645002165	PREDICTED: presequence protease, mitochondrial [Nasonia vitripennis]	117.219	6.29053	16.62	1	14	0.936709	1.0157	0.948864	0.967092	1.04547	1.00942	1.0233	1.02606	1.06098	0.0918377
198114513	cytochrome oxidase subunit 2 (mitochondrion) [Nasonia vitripennis]	26.1243	7.02002	27.48	2	6	1.04458	1.00825	1.0398	1.03087	1.0131	0.988424	0.952788	0.984771	0.955278	0.0919322
644997112	PREDICTED: putative fatty acyl-CoA reductase CG8306 [Nasonia vitripennis]	57.5448	9.0708	11.83	1	5	0.976773	1.00042	0.944806	0.973998	1.01225	1.07699	1.01125	1.03349	1.06109	0.0928435
645028604	PREDICTED: solute carrier family 12 member 4 isoform X2 [Nasonia vitripennis]	128.837	5.84619	14.43	2	15	1.07224	1.00274	1.03736	1.03745	0.987303	0.94602	1.00442	0.979246	0.9439	0.0931538
645033417	PREDICTED: V-type proton ATPase subunit B [Nasonia vitripennis]	37.8894	5.87158	77.06	1	21	1.04946	1.00907	1.01819	1.02558	0.989901	1.00915	0.974599	0.991217	0.966499	0.0952581
156536899	PREDICTED: transcription factor BTF3 homolog 4 [Nasonia vitripennis]	20.0996	6.01123	65.05	1	9	0.915571	1.00826	0.972912	0.965579	0.997914	1.05655	1.06947	1.04131	1.07843	0.0954387
645003470	PREDICTED: serine/threonine-protein phosphatase 2A activator-like isoform X3 [Nasonia vitripennis]	34.9166	6.91748	2.29	3	1	0.961708	0.8961	1.01955	0.959118	1.01627	1.0429	1.0787	1.04596	1.09054	0.0956119
156544078	PREDICTED: 60S ribosomal protein L35 [Nasonia vitripennis]	14.4655	10.8286	30.89	1	5	0.869899	0.985522	0.967636	0.941019	0.996105	1.02838	1.0609	1.02846	1.09292	0.0970448
645009296	PREDICTED: peptidyl-prolyl cis-trans isomerase FKBP8 [Nasonia vitripennis]	42.726	5.93506	23.5	1	7	0.9393	1.01339	0.895765	0.949486	1.05301	1.00729	1.02627	1.02886	1.08359	0.0972911
645011348	PREDICTED: host cell factor 1 [Nasonia vitripennis]	166.728	4.94482	0.69	1	1	0.91794	0.985978	0.980354	0.961424	1.01085	1.09696	1.00988	1.03923	1.08093	0.097894
645033657	PREDICTED: congested-like trachea protein [Nasonia vitripennis]	31.7447	9.33447	20	1	5	0.970547	0.950587	0.999751	0.973628	1.0405	0.986955	1.04089	1.02278	1.05048	0.0984384
156552444	PREDICTED: uncharacterized protein LOC100116463 [Nasonia vitripennis]	48.4537	5.10986	44.66	1	15	0.982936	0.986442	0.969911	0.979763	1.00542	1.01074	1.07904	1.03173	1.05304	0.0985497
644993458	PREDICTED: filaggrin-like [Nasonia vitripennis]	186.478	9.46631	8.94	1	16	0.741274	0.859807	1.05283	0.884638	1.15908	1.02324	1.107	1.09644	1.23942	0.09925
289629276	short-chain dehydrogenase/reductase [Nasonia vitripennis]	27.5828	8.1626	37.65	1	7	1.0397	0.800708	0.593896	0.811434	1.3538	1.10365	1.02195	1.1598	1.42932	0.0993377
645027020	PREDICTED: 39S ribosomal protein L21, mitochondrial [Nasonia vitripennis]	25.5368	9.62744	12.27	1	2	1.08772	1.05481	0.980838	1.04112	0.955559	0.972074	0.985615	0.971083	0.932726	0.0994398
156551878	PREDICTED: viral IAP-associated factor homolog [Nasonia vitripennis]	26.9486	4.79248	8.09	1	1	0.921912	0.859508	1.00771	0.92971	1.01918	1.16258	1.01891	1.06689	1.14755	0.0998288
644992919	PREDICTED: histone H3.3 [Nasonia vitripennis]	15.3185	11.2681	32.35	1	1	0.978313	1.09911	1.06933	1.04892	0.945632	0.997944	0.945162	0.962913	0.918008	0.0999591
345490166	PREDICTED: protein argonaute-2-like [Nasonia vitripennis]	62.4022	9.36377	8.88	1	4	0.986503	0.90283	0.918112	0.935815	1.07532	0.957043	1.08608	1.03948	1.11078	0.100294
644996393	PREDICTED: serine/threonine-protein kinase STK11 isoform X7 [Nasonia vitripennis]	44.7453	5.10986	3.88	7	1	0.995084	0.955191	0.984516	0.978264	1.04253	1.05391	0.988327	1.02826	1.0511	0.100402
645007223	PREDICTED: dolichyl-diphosphooligosaccharide--protein glycosyltransferase subunit STT3B isoform X3 [Nasonia vitripennis]	81.6658	8.86572	10.29	3	8	0.933293	1.01362	0.975605	0.974172	1.00403	1.05126	1.04146	1.03225	1.05962	0.100514
229606083	cytochrome c1, heme protein, mitochondrial [Nasonia vitripennis]	33.8439	7.82568	40.2	1	8	1.02198	0.994445	1.07693	1.03112	0.98879	0.955993	0.981544	0.975442	0.946004	0.100819
345497953	PREDICTED: uncharacterized protein LOC100113862 [Nasonia vitripennis]	48.8268	7.98682	2.6	1	1	1.11665	1.1232	0.961852	1.06723	0.936681	0.980463	0.935824	0.950989	0.891078	0.100962
645005045	PREDICTED: ribosomal RNA processing protein 1 homolog isoform X2 [Nasonia vitripennis]	64.0441	8.27979	3.57	2	1	1.02874	1.03498	1.04887	1.03753	1.03297	0.947597	0.943606	0.974724	0.939466	0.102328
269784689	NADH-ubiquinone oxidoreductase 75 kDa subunit, mitochondrial [Nasonia vitripennis]	80.7934	6.59521	53.36	1	35	1.0259	0.990036	1.07233	1.02942	0.986575	0.963759	0.981173	0.977169	0.949239	0.102797
645001862	PREDICTED: sarcosine dehydrogenase, mitochondrial [Nasonia vitripennis]	104.788	7.43018	17.68	1	16	0.986426	1.07336	1.04753	1.03577	0.944534	0.959094	1.00482	0.969481	0.935999	0.103371
645029019	PREDICTED: maternal protein tudor isoform X3 [Nasonia vitripennis]	269.189	5.36377	8.54	4	16	0.923466	1.00632	0.97023	0.966672	1.03877	1.00368	1.02145	1.0213	1.05651	0.103874
645035835	PREDICTED: superoxide dismutase [Cu-Zn]-like isoform X2 [Nasonia vitripennis]	21.6861	6.93213	19.62	2	4	1.01976	1.04945	1.03117	1.03346	0.904353	1.02097	0.956059	0.960462	0.929367	0.104134
645009607	PREDICTED: mediator of RNA polymerase II transcription subunit 12-like isoform X5 [Nasonia vitripennis]	156.355	9.90576	12.05	4	13	0.910266	1.01644	0.964205	0.963638	1.06243	1.03585	1.00826	1.03551	1.07459	0.104976
156544828	PREDICTED: protein tweety [Nasonia vitripennis]	84.2211	9.18799	2.49	3	1	1.0201	0.963941	0.78918	0.924408	1.09863	1.10261	1.03098	1.07741	1.16551	0.10519
645006832	PREDICTED: cell division cycle and apoptosis regulator protein 1-like isoform X2 [Nasonia vitripennis]	134.602	8.19189	1.85	2	2	1.09076	1.10425	1.04257	1.07919	0.991527	0.809756	1.0144	0.938561	0.869688	0.105215
645012077	PREDICTED: peroxiredoxin-5, mitochondrial isoform X2 [Nasonia vitripennis]	19.7622	8.42627	59.14	2	8	0.934023	1	0.983084	0.972371	0.996202	1.03595	1.07871	1.03695	1.06642	0.105366
300863149	aldehyde dehydrogenase family 7-like [Nasonia vitripennis]	57.7469	7.62061	26.79	2	13	1.07198	1.0788	0.974263	1.04168	0.971135	0.98527	0.94472	0.967042	0.928349	0.105412
345489382	PREDICTED: protein 4.1 homolog isoform X4 [Nasonia vitripennis]	213.917	8.41162	24.32	5	38	1.05105	0.998641	1.00934	1.01968	0.989217	0.977808	0.98924	0.985421	0.966407	0.10552
644991825	PREDICTED: cathepsin L1 isoform X4 [Nasonia vitripennis]	32.8298	9.02686	5.15	4	1	0.87737	0.909763	1.03155	0.939559	1.03127	1.12154	1.0205	1.05777	1.12581	0.105996
644995004	PREDICTED: protein furry isoform X5 [Nasonia vitripennis]	356.171	6.41748	1.78	9	2	1.08038	1.01537	0.985558	1.0271	0.966665	0.977711	0.959972	0.968116	0.94257	0.106988
645016480	PREDICTED: protein N-terminal glutamine amidohydrolase [Nasonia vitripennis]	27.7567	6.93213	11.11	1	2	0.993646	0.959385	0.987194	0.980075	1.02987	1.09357	0.99992	1.04112	1.06228	0.107701
645035027	PREDICTED: thrombin inhibitor rhodniin-like [Nasonia vitripennis]	9.23447	4.89404	16.47	1	1	1.17955	1.13163	1.02098	1.11072	1.07411	0.808902	0.878325	0.920444	0.828691	0.10812
645026464	PREDICTED: paramyosin, short form-like [Nasonia vitripennis]	34.1804	8.45557	23.47	1	8	1.01242	0.984113	1.02125	1.00593	0.992286	0.953841	0.974074	0.9734	0.967665	0.108154
645005900	PREDICTED: dynamin isoform X7 [Nasonia vitripennis]	96.975	7.72314	32.14	7	24	1.12086	0.989438	1.03333	1.04788	0.962304	0.948401	0.985124	0.965276	0.921174	0.10838
645025927	PREDICTED: eukaryotic peptide chain release factor subunit 1 isoform X2 [Nasonia vitripennis]	49.0253	5.94775	20.87	2	7	0.887695	1.00381	0.943215	0.944908	1.01302	1.00293	1.10057	1.03884	1.09941	0.108846
645036054	PREDICTED: plasminogen activator inhibitor 1 RNA-binding protein-like isoform X3 [Nasonia vitripennis]	49.1882	8.11865	28.34	3	9	0.887971	1.0176	0.952301	0.952623	1.00466	1.03961	1.07993	1.0414	1.09319	0.109535
645033375	PREDICTED: uncharacterized protein LOC100123757 [Nasonia vitripennis]	152.11	6.21436	4.79	1	5	1.07289	0.979629	1.10896	1.05383	0.945335	0.928255	1.00878	0.960791	0.911715	0.111252
345495981	PREDICTED: paramyosin isoform X2 [Nasonia vitripennis]	60.0739	5.63037	26.55	2	12	1.02046	0.998497	1.05037	1.02311	0.997497	0.971543	0.995331	0.988124	0.965805	0.111398
645013114	PREDICTED: LOW QUALITY PROTEIN: esterase E4-like [Nasonia vitripennis]	61.3948	8.6167	7.88	1	2	1.19556	1.21661	0.939482	1.11722	0.960214	0.821453	0.958128	0.913265	0.817447	0.111545
645030881	PREDICTED: LOW QUALITY PROTEIN: ras GTPase-activating protein-binding protein 1 [Nasonia vitripennis]	69.8691	6.3667	15.61	1	8	0.967481	1.04101	0.890306	0.966266	1.05848	1.11979	1.03075	1.06967	1.10702	0.111733
645016218	PREDICTED: stromal membrane-associated protein 1 isoform X2 [Nasonia vitripennis]	50.2486	8.76318	1.73	2	1	1.02181	0.941085	0.956262	0.973051	1.07293	1.01194	1.02354	1.03614	1.06483	0.111848
345485905	PREDICTED: aldo-keto reductase AKR2E4-like [Nasonia vitripennis]	34.1476	6.01123	33.44	1	9	0.936301	1.02775	0.927437	0.963831	1.00895	1.03618	1.09232	1.04582	1.08506	0.112155
645013357	PREDICTED: uncharacterized protein LOC100121037 [Nasonia vitripennis]	265.509	7.09326	1.03	1	2	0.993131	0.98051	0.904723	0.959455	0.984339	1.05761	1.09163	1.04452	1.08866	0.112805
645027806	PREDICTED: arrestin domain-containing protein 3-like [Nasonia vitripennis]	45.3626	5.31299	10.51	1	4	1.00727	0.993796	0.987744	0.996271	1.00695	1.01345	1.04116	1.02052	1.02434	0.112829
345485570	PREDICTED: myc box-dependent-interacting protein 1 isoform X4 [Nasonia vitripennis]	40.1993	6.27783	37.89	4	10	1.00561	1.00441	1.02636	1.01213	0.992111	1.00159	0.996444	0.996716	0.984773	0.113657
645038619	PREDICTED: electroneutral sodium bicarbonate exchanger 1 [Nasonia vitripennis]	143.804	6.52197	5.54	1	6	1.09204	1.01661	0.988483	1.03238	0.977696	0.953526	0.973561	0.968261	0.937894	0.114012
288856283	NADH dehydrogenase [ubiquinone] 1 beta subcomplex subunit 10 [Nasonia vitripennis]	20.3448	6.63916	53.29	2	7	1.07669	0.989952	1.10656	1.05773	0.987572	0.959347	1.00188	0.982935	0.929283	0.114256
645017125	PREDICTED: long-chain-fatty-acid--CoA ligase 4 isoform X3 [Nasonia vitripennis]	78.797	8.38232	15.56	3	11	0.90292	0.995414	0.990044	0.962793	0.993673	1.06112	1.05804	1.03761	1.07771	0.114461
345496530	PREDICTED: solute carrier family 2, facilitated glucose transporter member 3-like isoform X1 [Nasonia vitripennis]	59.0179	6.3667	17.93	3	9	1.00051	1.01955	1.04435	1.02147	1.01298	0.962611	0.954515	0.976702	0.956173	0.114671
644993185	PREDICTED: microtubule-associated protein tau [Nasonia vitripennis]	28.7188	9.99365	12.69	1	2	1.17789	1.06175	0.975186	1.07161	0.948609	0.969906	0.937541	0.952018	0.888404	0.114749
345485002	PREDICTED: AP-3 complex subunit beta-1 [Nasonia vitripennis]	121.652	5.87158	1.93	1	2	1.09186	1.10306	0.974774	1.05657	1.0117	0.934257	0.927524	0.957827	0.906547	0.114749
645026448	PREDICTED: paramyosin, long form-like [Nasonia vitripennis]	102.316	5.46533	76.4	1	71	1.03382	0.990056	1.04971	1.02453	0.970381	0.989829	0.996107	0.985439	0.961847	0.114762
156554739	PREDICTED: carbonic anhydrase 2-like [Nasonia vitripennis]	38.8323	5.40186	12.57	1	3	1.08399	1.01271	1.12153	1.07274	1.03023	0.991863	0.912013	0.978034	0.911716	0.115434
645004994	PREDICTED: LOW QUALITY PROTEIN: large subunit GTPase 1 homolog [Nasonia vitripennis]	72.0372	7.40088	4.79	1	2	1.11196	0.974361	1.06903	1.05178	0.933661	1.00946	0.898111	0.947077	0.90045	0.115607
645016448	PREDICTED: protein CDV3 homolog [Nasonia vitripennis]	28.4641	5.43994	3.5	1	1	0.895682	1.04368	0.855825	0.931728	1.10102	1.03525	1.02919	1.05515	1.13247	0.11563
645015151	PREDICTED: probable serine hydrolase [Nasonia vitripennis]	37.3372	8.06006	15.55	1	4	0.857421	0.935791	1.00466	0.932625	0.989342	1.13435	1.03618	1.05329	1.12938	0.115919
645013992	PREDICTED: gastric triacylglycerol lipase-like, partial [Nasonia vitripennis]	45.6082	7.59131	11.81	1	4	0.76701	0.797013	1.07067	0.878232	1.20262	0.992494	1.12626	1.10713	1.26063	0.11618
156551419	PREDICTED: serine/threonine-protein kinase 3 isoform X2 [Nasonia vitripennis]	59.2428	5.31299	8.06	2	3	0.941235	0.985031	0.982771	0.969679	0.975572	1.09782	1.078	1.05046	1.08331	0.116611
645002404	PREDICTED: eukaryotic initiation factor 4A-I [Nasonia vitripennis]	48.1512	5.66846	47.75	1	19	0.978148	1.00713	0.977644	0.987639	1.01228	1.00049	1.01347	1.00875	1.02137	0.117017
156545661	PREDICTED: endonuclease G, mitochondrial [Nasonia vitripennis]	37.5581	9.36377	10.81	1	4	0.993203	1.00615	0.982273	0.993874	1.03928	0.997836	1.0304	1.02251	1.02881	0.117019
345485899	PREDICTED: 1,5-anhydro-D-fructose reductase-like [Nasonia vitripennis]	35.1832	5.80811	28.21	1	7	0.873371	1.01732	0.956819	0.949172	1.0437	1.08568	1.00365	1.04434	1.10027	0.118332
156543366	PREDICTED: S-methyl-5'-thioadenosine phosphorylase [Nasonia vitripennis]	30.5696	7.50342	25.09	1	5	0.916551	0.969582	0.995935	0.960689	0.977056	1.05692	1.06656	1.03351	1.0758	0.118481
345489961	PREDICTED: scavenger receptor class B member 1 isoform X2 [Nasonia vitripennis]	56.067	7.23975	14.53	2	7	1.17259	1.00997	1.03062	1.07106	0.971461	0.985599	0.944651	0.967237	0.903063	0.119158
156538681	PREDICTED: adenylate kinase [Nasonia vitripennis]	27.5593	7.44482	46.18	1	11	0.940705	1.01065	0.986471	0.979274	1.05839	1.00853	1.02139	1.02944	1.05122	0.119255
156549734	PREDICTED: FAM203 family protein CG6073-like [Nasonia vitripennis]	44.0986	4.81787	6.72	1	2	1.02064	0.995102	1.06529	1.02701	0.992866	0.987977	0.974253	0.985032	0.959125	0.119465
345487293	PREDICTED: uncharacterized protein LOC100119851 [Nasonia vitripennis]	144.643	6.01123	1.47	1	2	0.95597	0.968881	0.903887	0.942912	1.16615	1.00936	0.996697	1.0574	1.12142	0.119655
645029746	PREDICTED: putative peptidyl-prolyl cis-trans isomerase dodo [Nasonia vitripennis]	17.8928	6.93213	37.04	1	5	0.92146	1.01211	0.924354	0.952642	0.988304	1.08812	1.0276	1.03468	1.08611	0.119676
156553375	PREDICTED: annulin isoform X2 [Nasonia vitripennis]	83.851	5.90967	16.21	2	9	1.1011	1.01003	1.00693	1.03935	0.973847	0.974871	0.985836	0.978185	0.941147	0.12081
645007721	PREDICTED: ankyrin repeat domain-containing protein 49-like, partial [Nasonia vitripennis]	15.3411	4.48779	8.03	1	1	1.022	1.06352	1.04104	1.04219	1.01669	0.91206	0.996351	0.975033	0.935563	0.121085
156542803	PREDICTED: lysine--tRNA ligase isoform X2 [Nasonia vitripennis]	67.0939	6.39209	28.03	2	15	0.919597	1.00473	0.98607	0.970133	1.02358	1.01969	1.01895	1.02074	1.05216	0.122149
645000602	PREDICTED: fasciclin-2 [Nasonia vitripennis]	101.349	6.7124	12.68	1	10	1.11891	1.03041	0.99498	1.0481	0.96904	0.991595	0.96128	0.973972	0.929276	0.122552
645010144	PREDICTED: uncharacterized Golgi apparatus membrane protein-like protein CG5021, partial [Nasonia vitripennis]	17.273	9.86182	7.19	1	1	0.918678	1.02617	0.954791	0.966545	1.01341	1.06454	1.02683	1.03493	1.07075	0.123154
345490897	PREDICTED: spermine oxidase-like isoform X1 [Nasonia vitripennis]	58.2684	5.66846	8.81	6	2	0.837124	0.999243	0.962952	0.933106	1.01635	1.14252	1.0175	1.05879	1.13469	0.123342
218749817	cytochrome b5-related-like [Nasonia vitripennis]	50.8075	7.59131	8.01	2	3	1.4379	1.32894	0.85667	1.20784	0.815938	0.971907	0.691619	0.826488	0.684271	0.123491
645013458	PREDICTED: nucleoporin Ndc1 isoform X2 [Nasonia vitripennis]	62.4029	8.89502	7.33	2	3	0.920605	0.999977	1.0107	0.977094	1.06112	1.01724	1.03413	1.0375	1.06182	0.124547
156547213	PREDICTED: homogentisate 1,2-dioxygenase [Nasonia vitripennis]	50.2344	6.48096	24.77	1	8	1.09027	1.06991	0.987927	1.04937	1.01801	0.964663	0.912712	0.965129	0.919723	0.125617
345478795	PREDICTED: eukaryotic translation initiation factor 3 subunit B [Nasonia vitripennis]	82.122	5.87158	23.58	1	16	0.920049	1.0018	0.983754	0.968536	0.993118	1.05019	1.03719	1.02683	1.06019	0.125925
645001806	PREDICTED: choline-phosphate cytidylyltransferase B-like isoform X6 [Nasonia vitripennis]	41.1503	5.77002	10.86	7	4	1.11461	1.00739	1.02065	1.04755	1.00241	0.962497	0.969978	0.978296	0.93389	0.125982
156542911	PREDICTED: proteasome subunit beta type-4 isoform X1 [Nasonia vitripennis]	29.2946	5.99854	53.44	2	8	1.03811	0.992624	1.0184	1.01638	1.00303	0.944901	0.977598	0.975177	0.959464	0.126063
644992794	PREDICTED: 40S ribosomal protein SA [Nasonia vitripennis]	34.4244	4.98291	26.18	1	8	0.898662	1.0024	0.977344	0.959468	0.99778	1.0272	1.07092	1.03197	1.07556	0.127505
156543388	PREDICTED: transmembrane protein 8A-like [Nasonia vitripennis]	79.4095	5.85889	2.64	1	1	1.17464	1.0959	0.968477	1.07967	0.943425	1.00951	0.867317	0.940086	0.870715	0.127541
156546522	PREDICTED: 3-ketoacyl-CoA thiolase, mitochondrial [Nasonia vitripennis]	41.5378	8.71924	57.89	1	18	0.989857	0.987532	0.963897	0.980429	1.07362	1.02815	0.988641	1.03014	1.0507	0.127546
645001235	PREDICTED: striatin-3 isoform X3 [Nasonia vitripennis]	75.9542	5.26221	8.75	3	5	1.08138	0.992875	1.01525	1.02983	0.988373	0.984481	0.939826	0.970893	0.942768	0.128186
300795415	39S ribosomal protein L53, mitochondrial [Nasonia vitripennis]	15.3082	9.46631	23.53	1	3	0.949156	1.01773	0.953383	0.973424	0.99922	1.03387	1.10172	1.04494	1.07347	0.128409
645026752	PREDICTED: nidogen-2-like [Nasonia vitripennis]	103.761	5.12256	19.15	1	16	1.04954	0.986883	1.03573	1.02405	0.987388	0.997948	0.953943	0.97976	0.95675	0.128604
645012840	PREDICTED: 60 kDa SS-A/Ro ribonucleoprotein-like isoform X2 [Nasonia vitripennis]	62.0488	8.82178	13.94	2	8	0.951226	1.02111	0.97024	0.98086	1.01254	1.01724	1.05336	1.02772	1.04777	0.128673
645019617	PREDICTED: serine-arginine protein 55 isoform X6 [Nasonia vitripennis]	38.5991	11.4731	9.34	7	3	0.82583	1.00374	0.89585	0.908473	0.977971	1.17585	1.0241	1.05931	1.16603	0.129064
645038012	PREDICTED: organic cation transporter protein [Nasonia vitripennis]	60.4955	6.44287	4.54	1	3	0.995531	1.03084	1.05307	1.02648	0.992318	0.965288	1.00494	0.987516	0.962039	0.129178
645023643	PREDICTED: serine protease snake isoform X2 [Nasonia vitripennis]	42.4452	5.59229	10.31	2	3	0.946292	0.915091	1.03043	0.963939	1.06956	0.994533	1.07218	1.04542	1.08453	0.129875
645022421	PREDICTED: ras-related protein Rab-3 isoform X3 [Nasonia vitripennis]	25.2703	5.10986	30.18	3	6	1.04957	1.00653	1.00414	1.02008	0.96731	1.0058	0.981281	0.984796	0.965408	0.130036
645005149	PREDICTED: 26S protease regulatory subunit 10B [Nasonia vitripennis]	44.5254	7.10791	47.84	1	17	1.01497	0.989095	0.982058	0.995376	1.01315	1.01311	1.01739	1.01455	1.01926	0.13067
289177132	cytochrome P450 4AB15 [Nasonia vitripennis]	58.5297	8.71924	2.36	11	1	0.887906	1.04508	0.921119	0.951369	1.03523	1.02375	1.09323	1.05074	1.10445	0.131005
345491782	PREDICTED: probable salivary secreted peptide [Nasonia vitripennis]	15.4792	8.93896	20.71	1	3	0.919876	1.02026	0.983784	0.974639	1.0544	1.05733	1.00483	1.03885	1.06588	0.13129
156554743	PREDICTED: estradiol 17-beta-dehydrogenase 8 [Nasonia vitripennis]	26.4009	6.55127	44.4	1	8	1.11274	1.01556	1.02423	1.05084	0.998081	0.988526	0.862726	0.949778	0.903824	0.132087
239787138	venom protein D precursor [Nasonia vitripennis]	44.317	7.66455	8.88	1	3	0.730136	0.852863	1.10067	0.894557	1.05494	1.19205	1.09426	1.11375	1.24503	0.132683
345489096	PREDICTED: organic cation transporter protein-like [Nasonia vitripennis]	74.4943	5.2876	1.5	1	1	0.804262	1.05991	0.851795	0.905321	1.16446	1.03784	1.02317	1.07516	1.1876	0.133512
645032506	PREDICTED: ras-like protein 1 [Nasonia vitripennis]	22.1172	8.11865	26.8	1	3	1.06799	1.01703	1.01548	1.0335	1.01588	0.991263	0.957552	0.988231	0.956199	0.134181
645022093	PREDICTED: cdc42 homolog [Nasonia vitripennis]	21.261	6.55127	20.94	1	2	1.12283	0.978984	1.08265	1.06149	0.952793	0.991548	0.98965	0.977997	0.921344	0.134978
645007112	PREDICTED: syntaxin-binding protein 5 isoform X3 [Nasonia vitripennis]	137.891	6.88818	3.9	4	3	1.06822	1.04496	1.04153	1.05157	1.04569	0.934081	0.842988	0.940918	0.894773	0.135016
156547023	PREDICTED: chloride intracellular channel exc-4 [Nasonia vitripennis]	30.5283	5.79541	36.84	1	6	1.08205	1.00777	1.04417	1.04466	0.99189	0.941899	1.02227	0.985353	0.943226	0.135249
645021499	PREDICTED: uncharacterized protein C18orf8 isoform X1 [Nasonia vitripennis]	77.3459	7.1958	2.18	1	1	1.1651	0.956062	1.12168	1.08095	0.972156	0.876306	0.988682	0.945715	0.874895	0.136323
345494337	PREDICTED: S-adenosylmethionine synthase isoform X2 [Nasonia vitripennis]	44.7324	6.31592	10.64	2	4	1.10487	0.997699	1.03837	1.04698	0.95867	1.00829	0.982247	0.98307	0.938959	0.136461
645017760	PREDICTED: toll-like receptor 13 [Nasonia vitripennis]	112.038	8.22119	4.92	1	4	1.18696	0.98458	1.03837	1.06997	0.918234	0.988144	0.947787	0.951388	0.889173	0.136721
156553330	PREDICTED: cdc42 homolog [Nasonia vitripennis]	21.208	6.03662	26.18	1	2	1.0435	1.03869	1.02567	1.03596	0.960457	0.942008	1.03843	0.9803	0.946276	0.137427
315189842	navisecapin-1 [Nasonia vitripennis]	17.528	6.20166	6.88	2	1	0.967033	1.01597	0.930531	0.971178	1.08098	0.99483	1.03298	1.03626	1.06702	0.137521
645005641	PREDICTED: LOW QUALITY PROTEIN: dmX-like protein 2 [Nasonia vitripennis]	374.172	6.48096	4.16	1	11	0.94962	0.935746	1.02035	0.968573	0.99624	1.0592	1.02707	1.0275	1.06084	0.138281
645023254	PREDICTED: UDP-glucuronosyltransferase 2A3-like [Nasonia vitripennis]	41.2825	8.77783	4.58	1	1	0.994059	0.984833	1.20544	1.06144	0.925034	0.938026	0.920964	0.928008	0.874289	0.13841
345484059	PREDICTED: pancreatic triacylglycerol lipase-like [Nasonia vitripennis]	49.5822	6.48096	18.55	1	7	1.02364	1.03075	1.04501	1.03314	0.907457	0.970461	1.02726	0.968392	0.937333	0.139414
156552806	PREDICTED: serine--tRNA ligase, cytoplasmic [Nasonia vitripennis]	56.4168	6.81494	31.98	1	14	0.921645	1.01449	0.981567	0.972568	0.997477	1.0578	1.04237	1.03255	1.06167	0.140068
645002109	PREDICTED: serine--pyruvate aminotransferase, mitochondrial isoform X4 [Nasonia vitripennis]	42.9894	8.47021	16.79	4	6	1.00042	1.03896	1.00996	1.01645	0.998372	0.993985	0.992402	0.99492	0.978822	0.140255
156544990	PREDICTED: U6 snRNA-associated Sm-like protein LSm7 [Nasonia vitripennis]	12.8606	6.68311	27.83	1	3	1.06188	1.00992	1.07819	1.05	1.03858	0.886679	0.957858	0.961041	0.91528	0.14035
156542484	PREDICTED: ADP-ribosylation factor-like protein 1 [Nasonia vitripennis]	20.2706	7.92822	18.33	1	2	1.03403	1.0322	1.04639	1.03754	0.965862	1.0396	0.934295	0.979918	0.944461	0.141498
239049675	serine protease homolog 21 precursor [Nasonia vitripennis]	46.8322	5.99854	37.12	1	14	0.898457	0.955259	1.03289	0.962203	1.02183	1.02219	1.0842	1.04274	1.0837	0.142089
239787130	venom protein Y precursor [Nasonia vitripennis]	11.7918	8.19189	42.72	1	3	0.771124	0.977777	0.998112	0.915671	1.16351	1.11811	0.972098	1.08457	1.18446	0.142525
156555446	PREDICTED: ATP-binding cassette sub-family D member 3 [Nasonia vitripennis]	55.727	9.78857	17.78	1	8	0.917135	1.00138	0.983314	0.967278	1.0413	1.00225	1.0122	1.01858	1.05304	0.142551
645022520	PREDICTED: venom protein J isoform X1 [Nasonia vitripennis]	16.4479	9.20264	13.75	2	2	0.576907	0.823391	1.1031	0.834465	1.01236	1.19341	1.19008	1.13195	1.3565	0.142667
197245406	translocase of inner mitochondrial membrane 50 homolog [Nasonia vitripennis]	46.3723	7.56201	14.54	1	5	1.05405	1.04426	1.0246	1.04097	1.04605	0.935184	0.924817	0.968685	0.930558	0.143159
645023227	PREDICTED: alkyldihydroxyacetonephosphate synthase isoform X2 [Nasonia vitripennis]	58.9367	6.94678	18.95	2	9	1.13777	0.954934	1.01542	1.03604	0.959669	0.903461	0.938761	0.933964	0.901472	0.143616
156547595	PREDICTED: probable uridine nucleosidase 1 [Nasonia vitripennis]	36.0213	5.97314	15.34	1	3	0.985393	1.07571	1.05262	1.03791	1.00379	0.929328	0.988412	0.973842	0.938276	0.144081
645022034	PREDICTED: uncharacterized protein LOC103317371 [Nasonia vitripennis]	18.248	4.62744	10.37	1	1	1.08164	1.0598	1.06401	1.06848	0.960828	0.928641	1.07385	0.987774	0.924465	0.144184
644999892	PREDICTED: protein purity of essence-like [Nasonia vitripennis]	464.2	6.39209	3.18	1	10	1.04956	1.03657	1.00204	1.02939	1.00395	0.925194	0.999905	0.976351	0.948476	0.144195
345492883	PREDICTED: ras-related GTP-binding protein C [Nasonia vitripennis]	46.812	4.81787	7.78	1	3	1.04341	1.07452	0.994444	1.03746	1.01017	0.992943	0.954414	0.985843	0.950248	0.144875
345485028	PREDICTED: uncharacterized protein LOC100122198 isoform X2 [Nasonia vitripennis]	66.0395	6.7417	9.95	2	5	1.11299	1.00337	1.00906	1.04181	0.969972	0.994158	0.960879	0.975003	0.935877	0.145186
156554677	PREDICTED: RNA-binding protein squid isoform X3 [Nasonia vitripennis]	35.8408	6.44287	33.14	4	1	0.959867	1.0305	0.918926	0.969764	1.03755	1.00574	1.06602	1.03644	1.06875	0.145468
345493129	PREDICTED: cuticle protein CP14.6 [Nasonia vitripennis]	13.9619	4.57666	20.45	1	1	1.02558	0.988845	1.05919	1.02454	1.00128	0.865014	0.96212	0.942804	0.920221	0.145593
156545726	PREDICTED: 26S proteasome non-ATPase regulatory subunit 5-like [Nasonia vitripennis]	56.5949	5.03369	27.78	1	12	0.949052	1.02106	0.956782	0.975631	1.01101	1.05692	1.00877	1.02557	1.05118	0.145743
645014157	PREDICTED: eukaryotic translation initiation factor 4B [Nasonia vitripennis]	62.4623	5.64307	29.37	1	14	0.913783	1.04064	0.935611	0.963344	1.02027	1.03691	1.0493	1.03549	1.07489	0.146004
645022599	PREDICTED: eukaryotic translation initiation factor 4H-like isoform X5 [Nasonia vitripennis]	30.5229	8.6167	31.72	6	10	0.945077	1.01539	0.915728	0.958733	1.01618	1.03443	0.996085	1.01557	1.05928	0.146248
645018338	PREDICTED: ferrochelatase, mitochondrial [Nasonia vitripennis]	45.4345	8.90967	17.84	1	5	0.930414	0.957175	0.996544	0.961378	0.975519	1.09425	1.02675	1.03217	1.07364	0.146644
645006994	PREDICTED: guanine nucleotide-binding protein G(s) subunit alpha isoform X2 [Nasonia vitripennis]	20.7844	5.73193	23.73	2	4	1.15235	1.00505	1.04117	1.06619	0.985464	1.00817	0.94779	0.980475	0.919604	0.146704
645008139	PREDICTED: histidine--tRNA ligase, cytoplasmic isoform X3 [Nasonia vitripennis]	56.1084	7.37158	12.05	4	7	0.934673	0.977709	0.987085	0.966489	1.01585	1.05685	0.977556	1.01675	1.05201	0.147183
345487052	PREDICTED: sentrin-specific protease 1-like [Nasonia vitripennis]	63.7925	8.86572	2.03	1	1	0.93572	0.966063	1.0105	0.970762	0.981123	1.07046	1.04553	1.03237	1.06346	0.147336
345488558	PREDICTED: mannose-1-phosphate guanyltransferase alpha [Nasonia vitripennis]	45.9866	7.47412	2.39	1	1	0.995315	0.865276	1.01125	0.957282	1.09629	1.02167	1.03241	1.05012	1.09698	0.147372
156538389	PREDICTED: 39S ribosomal protein L41, mitochondrial [Nasonia vitripennis]	19.8844	9.27588	16.57	1	2	0.964705	0.950386	0.880371	0.931821	0.939231	1.07656	1.18186	1.06588	1.14387	0.148054
156549949	PREDICTED: uncharacterized protein LOC100119198 [Nasonia vitripennis]	14.638	9.59814	11.51	1	1	1.07512	0.958737	1.26708	1.10031	0.986465	0.904841	0.905828	0.932378	0.847377	0.14815
645015435	PREDICTED: UPF0609 protein C4orf27 homolog isoform X3 [Nasonia vitripennis]	55.6366	5.59229	2.02	3	1	1.02853	0.93369	0.955773	0.972666	1.04759	0.994987	1.06998	1.03752	1.06668	0.148222
156540011	PREDICTED: troponin C, isoform 1-like [Nasonia vitripennis]	12.2817	4.09424	35.19	1	2	1.03269	0.97313	1.05186	1.01923	0.966663	0.96257	0.992122	0.973785	0.955415	0.148631
645008486	PREDICTED: torsin-like protein isoform X2 [Nasonia vitripennis]	36.2633	7.62061	4.39	2	1	0.987984	1.03813	1.06105	1.02905	0.986066	1.00592	0.953891	0.981961	0.954236	0.148652
345496148	PREDICTED: prohibitin-2 [Nasonia vitripennis]	15.9002	9.81787	65.03	1	8	0.932378	0.941274	1.02962	0.967757	1.01699	1.03054	1.02329	1.02361	1.05771	0.148759
345492361	PREDICTED: uncharacterized protein LOC100677885 [Nasonia vitripennis]	43.5926	4.94482	2.61	1	1	0.952931	1.11906	1.11439	1.06213	0.888391	0.993066	0.96755	0.949669	0.894119	0.149068
345479163	PREDICTED: 5'-3' exoribonuclease 1-like isoform X2 [Nasonia vitripennis]	192.456	8.67529	2.14	2	4	1.00011	0.994486	0.956841	0.983811	1.02577	1.01819	0.995131	1.01303	1.0297	0.149619
156552380	PREDICTED: glycine-rich cell wall structural protein-like [Nasonia vitripennis]	40.5236	7.48877	10.63	1	5	0.702356	1.05794	0.886892	0.882395	1.12475	1.17906	0.975867	1.09323	1.23893	0.151908
645029659	PREDICTED: connectin [Nasonia vitripennis]	59.1152	5.90967	14.31	1	5	1.17919	0.98458	1.02101	1.06159	0.913283	0.98716	0.948061	0.949501	0.89441	0.151928
645021304	PREDICTED: protein krasavietz [Nasonia vitripennis]	48.2411	5.65576	35.24	1	14	0.935769	1.00632	0.951695	0.964596	0.996128	0.99822	1.06713	1.02049	1.05795	0.151952
645039785	PREDICTED: phosphatidylinositol 4-phosphate 5-kinase type-1 gamma isoform X10 [Nasonia vitripennis]	112.315	9.53955	2.77	10	2	1.06512	1.0214	1.006	1.03084	1.02328	0.962974	0.966505	0.984253	0.954808	0.152043
156554028	PREDICTED: glutamate--cysteine ligase regulatory subunit [Nasonia vitripennis]	27.1661	5.2876	28.75	1	5	0.94961	1.00172	0.966273	0.972533	0.99475	1.03839	0.995854	1.00966	1.03818	0.152279
156546419	PREDICTED: isovaleryl-CoA dehydrogenase, mitochondrial [Nasonia vitripennis]	46.4286	8.01611	36.88	1	11	1.09252	0.992498	1.03565	1.04022	0.97684	0.927475	1.01377	0.972696	0.935086	0.152336
645004990	PREDICTED: transport and Golgi organization protein 1 isoform X3 [Nasonia vitripennis]	147.874	4.67822	2.46	4	3	1.00074	1.02781	1.02946	1.01934	1.00456	0.999754	0.951071	0.985127	0.966438	0.15352
156543993	PREDICTED: ubiquitin-conjugating enzyme E2 G1 [Nasonia vitripennis]	19.3888	5.2876	30.36	1	5	0.879	1.00712	0.981059	0.955728	1.05347	1.01334	1.01686	1.02789	1.0755	0.154335
156537417	PREDICTED: uncharacterized protein LOC100123257 [Nasonia vitripennis]	15.7678	6.31592	18.84	1	1	1.12822	0.932197	1.21136	1.09059	0.98575	0.876537	0.944492	0.935593	0.857876	0.155365
345484765	PREDICTED: glutamyl-tRNA(Gln) amidotransferase subunit B, mitochondrial [Nasonia vitripennis]	61.0661	8.82178	6.58	1	2	1.17825	0.972948	1.05382	1.06834	0.985252	0.978103	0.888788	0.950714	0.889898	0.155374
645038083	PREDICTED: phosphatidylinositol 5-phosphate 4-kinase type-2 alpha-like [Nasonia vitripennis]	9.78119	10.0815	9.41	1	1	1.01134	1.08671	1.0501	1.04939	0.992646	0.889462	1.02426	0.968788	0.923196	0.155676
645013488	PREDICTED: acyl-CoA Delta(11) desaturase [Nasonia vitripennis]	37.474	7.23975	16.41	1	6	0.919745	1.04641	0.891866	0.952672	1.0928	1.01617	1.02772	1.04557	1.09751	0.155717
645022839	PREDICTED: ras-related protein Rab-30-like [Nasonia vitripennis]	23.3187	5.49072	12.68	1	2	1.11824	0.963539	1.06927	1.05035	0.958439	0.943444	0.996686	0.96619	0.919873	0.156542
645021613	PREDICTED: uncharacterized protein LOC100116956 [Nasonia vitripennis]	129.68	7.45947	6.74	1	5	1.20783	0.99088	1.01152	1.07008	0.97245	0.871624	0.966897	0.93699	0.875629	0.156838
218749855	density-regulated protein [Nasonia vitripennis]	20.7865	5.10986	16.22	1	3	0.928801	1.03675	0.954323	0.973291	1.03872	1.03339	1.02016	1.03076	1.05904	0.156939
345497499	PREDICTED: uncharacterized protein LOC100115344 [Nasonia vitripennis]	71.2627	6.43018	8.44	1	4	1.12807	0.993819	1.05109	1.05766	0.975427	1.0212	0.939103	0.978575	0.925226	0.157689
289177192	cytochrome P450 9AG4 [Nasonia vitripennis]	57.7214	8.44092	31.67	1	12	1.04002	0.980021	1.04395	1.02133	0.967854	0.957775	1.00633	0.97732	0.956908	0.158581
156543740	PREDICTED: tripeptidyl-peptidase 2 [Nasonia vitripennis]	141.371	7.04932	38.88	1	43	1.01779	0.988329	1.04806	1.01806	0.979389	0.979276	0.999494	0.986053	0.96856	0.158759
645012514	PREDICTED: THO complex subunit 3 [Nasonia vitripennis]	35.8196	5.43994	7.45	1	2	0.851788	1.0235	0.965812	0.947032	1.00471	1.04859	1.0659	1.03973	1.09788	0.158989
645030150	PREDICTED: glutamic acid-rich protein-like isoform X1 [Nasonia vitripennis]	69.4801	4.01807	5.03	1	2	0.912246	0.936968	1.03869	0.962636	1.00564	1.06442	1.03651	1.03552	1.07572	0.159617
229608897	muscle LIM protein isoform 1 [Nasonia vitripennis]	53.3287	8.17725	56.07	2	21	0.897474	1.03496	0.958511	0.963649	1.05843	1.02281	1.02402	1.03509	1.07413	0.159905
289177164	cytochrome P450 6AQ8 [Nasonia vitripennis]	58.6517	9.05615	3.71	1	2	1.15888	0.870216	1.42406	1.15105	0.864804	0.916628	0.836909	0.87278	0.758246	0.160228
645030892	PREDICTED: RNA-binding protein squid isoform X4 [Nasonia vitripennis]	36.1441	6.81494	34.43	5	1	0.525939	0.858354	1.00479	0.796361	0.94632	1.4031	1.05872	1.13605	1.42655	0.160333
645016599	PREDICTED: inositol polyphosphate 1-phosphatase [Nasonia vitripennis]	40.2555	5.03369	10.66	1	3	1.09436	0.967882	1.08755	1.04993	0.908843	0.940148	1.02434	0.957778	0.912229	0.160872
644994753	PREDICTED: laminin subunit gamma-1 [Nasonia vitripennis]	179.231	5.10986	22.62	1	29	1.08608	0.997521	1.00234	1.02865	0.986431	0.985748	0.957977	0.976719	0.949517	0.161075
345489955	PREDICTED: programmed cell death 6-interacting protein-like [Nasonia vitripennis]	20.3459	6.52197	5	1	1	0.973704	0.935925	0.985504	0.965044	0.979816	1.12509	1.02452	1.04314	1.08093	0.161116
345480804	PREDICTED: uncharacterized protein LOC100122343 [Nasonia vitripennis]	40.9477	5.5542	15.83	1	5	0.771074	0.873073	1.08	0.908049	1.06972	1.12924	1.02018	1.07305	1.18171	0.161435
299764402	eukaryotic translation initiation factor 3 subunit F-1 [Nasonia vitripennis]	31.1147	5.21143	55.87	1	12	0.894865	1.01819	0.983906	0.965654	1.01396	1.05001	1.02952	1.03116	1.06784	0.161557
156547315	PREDICTED: guanine nucleotide-binding protein subunit beta-2 [Nasonia vitripennis]	37.8813	6.18896	13.58	1	4	0.989626	0.960046	1.00403	0.984568	0.983052	1.06416	1.05267	1.03329	1.04949	0.161995
645039868	PREDICTED: 4-coumarate--CoA ligase 1-like [Nasonia vitripennis]	62.379	8.48486	36.51	1	14	0.959426	1.01983	0.999566	0.992939	1.02536	1.01353	1.0379	1.0256	1.03289	0.162316
645012140	PREDICTED: 7-methylguanosine phosphate-specific 5'-nucleotidase-like [Nasonia vitripennis]	33.4203	6.23975	20.41	1	4	0.865038	0.996419	1.00295	0.954801	1.00492	1.06692	1.04083	1.03756	1.08667	0.162352
645002315	PREDICTED: LOW QUALITY PROTEIN: plectin-like [Nasonia vitripennis]	110.522	5.42725	21.7	1	17	1.00494	1.05332	1.00854	1.02227	1.0025	0.998711	0.969533	0.990247	0.968679	0.162446
345487767	PREDICTED: probable nucleoporin Nup58 isoform X3 [Nasonia vitripennis]	56.2643	9.27588	6.55	3	2	1.07448	1.00852	1.06456	1.04919	1.04856	0.952753	0.900909	0.967407	0.922053	0.162781
645033363	PREDICTED: dentin sialophosphoprotein-like isoform X3 [Nasonia vitripennis]	184.723	5.89697	1.74	3	2	0.890091	1.03308	0.944515	0.955895	1.08677	1.05858	0.985642	1.04366	1.09182	0.163024
229577142	alpha glucosidase II alpha subunit-like precursor [Nasonia vitripennis]	106.124	6.49365	22.52	2	18	0.964167	1.01115	1.00611	0.993808	1.00506	1.02803	1.06055	1.03121	1.03764	0.163294
645007819	PREDICTED: venom protein G isoform X1 [Nasonia vitripennis]	10.9777	5.09717	47.06	2	4	0.601681	0.891919	1.09176	0.861788	1.03594	1.20047	1.11631	1.11757	1.29681	0.163337
645031273	PREDICTED: alpha-tocopherol transfer protein-like [Nasonia vitripennis]	36.7282	8.5874	14.78	1	4	0.951272	1.02727	0.890669	0.956405	1.06765	1.0264	1.00041	1.03149	1.0785	0.16387
645038596	PREDICTED: neither inactivation nor afterpotential protein C isoform X2 [Nasonia vitripennis]	180.487	8.99756	5.25	4	7	1.13776	0.996658	1.01279	1.04907	1.00113	0.970786	0.863385	0.945099	0.900895	0.164091
198114503	NADH dehydrogenase subunit 5 (mitochondrion) [Nasonia vitripennis]	66.7144	8.88037	5.69	2	4	0.93068	0.960822	1.0355	0.975667	1.0151	1.04109	1.03456	1.03025	1.05594	0.164468
288856285	NADH dehydrogenase [ubiquinone] 1 beta subcomplex subunit 5, mitochondrial [Nasonia vitripennis]	21.9264	9.39307	19.13	2	4	1.03063	0.971736	1.129	1.04379	0.97093	0.936258	0.980827	0.962671	0.922284	0.16507
645025499	PREDICTED: probable serine/threonine-protein kinase tsuA isoform X1 [Nasonia vitripennis]	51.954	9.64209	11.37	2	4	0.96687	0.98069	0.934621	0.960727	0.960738	1.10007	1.03722	1.03268	1.07489	0.166004
645034943	PREDICTED: ornithine aminotransferase, mitochondrial-like [Nasonia vitripennis]	51.6968	9.18799	25.7	1	9	1.05727	1.07069	0.96972	1.03256	0.967835	0.981602	0.985342	0.97826	0.947411	0.166006
645028852	PREDICTED: MAGUK p55 subfamily member 6 isoform X5 [Nasonia vitripennis]	51.9848	6.49365	18.4	5	6	1.15432	0.991191	0.998838	1.04812	0.986564	0.935142	0.940672	0.954126	0.910324	0.166144
289577258	eukaryotic translation initiation factor 2 subunit 2 [Nasonia vitripennis]	35.7393	7.92822	18.21	1	6	0.904306	1.03852	0.94994	0.964255	1.01255	1.03791	1.04968	1.03338	1.07169	0.166234
645015177	PREDICTED: putative acyl-CoA-binding protein [Nasonia vitripennis]	10.9865	4.83057	50	1	4	0.8531	1.08754	0.838719	0.926452	1.05289	1.0931	1.04805	1.06468	1.1492	0.166737
288856287	NADH dehydrogenase [ubiquinone] 1 subunit C2 [Nasonia vitripennis]	14.1382	8.1333	15	1	2	1.05017	0.977102	1.10396	1.04374	0.960079	0.973714	1.00145	0.978416	0.937409	0.166877
645034025	PREDICTED: 3-hydroxyisobutyryl-CoA hydrolase, mitochondrial [Nasonia vitripennis]	41.9861	8.01611	41.45	1	12	1.00816	0.97111	0.99883	0.992699	1.02394	1.02869	0.998777	1.01714	1.02462	0.166946
645028711	PREDICTED: inosine-5'-monophosphate dehydrogenase [Nasonia vitripennis]	27.3987	5.96045	29.2	1	8	1.07819	1.07697	0.976164	1.04378	0.966821	0.995211	0.992403	0.984812	0.943508	0.16727
345498361	PREDICTED: eukaryotic translation initiation factor 5A [Nasonia vitripennis]	17.6816	5.26221	57.5	1	10	0.902525	1.02679	0.953494	0.960936	0.995305	1.03228	1.06161	1.02973	1.07159	0.167443
291220447	nasonin-3, partial [Nasonia vitripennis]	4.66522	8.29443	19.51	2	1	1.64872	1.58875	0.661971	1.29981	0.727509	0.722364	0.827707	0.759193	0.584078	0.167666
345495969	PREDICTED: WD repeat-containing protein 47, partial [Nasonia vitripennis]	30.7922	7.26904	32.27	1	5	1.01583	0.896272	0.934058	0.948721	1.06501	1.01877	0.979513	1.0211	1.07629	0.168201
644996613	PREDICTED: flotillin-1 isoform X2 [Nasonia vitripennis]	47.4193	5.46533	36.13	2	13	1.10526	0.996735	1.00517	1.03572	0.973372	0.979455	0.978497	0.977108	0.943407	0.168408
156541018	PREDICTED: protein BCCIP homolog [Nasonia vitripennis]	34.8621	4.51318	17.97	1	5	0.926158	0.982311	1.01551	0.97466	1.00482	1.01537	1.07412	1.03144	1.05826	0.168603
156549961	PREDICTED: protein ROP isoform X2 [Nasonia vitripennis]	67.6464	7.23975	39.26	2	19	1.09822	1.03096	0.98302	1.0374	1.00215	0.968937	0.961761	0.977617	0.942373	0.168878
645007424	PREDICTED: fibrous sheath CABYR-binding protein-like isoform X1 [Nasonia vitripennis]	77.5594	4.2085	24.86	2	12	1.02789	1.03442	0.99278	1.01836	0.989185	1.00012	0.912268	0.967192	0.949752	0.168893
645007392	PREDICTED: uncharacterized protein LOC100118844 isoform X2 [Nasonia vitripennis]	44.3599	10.1548	16.71	1	5	0.783129	0.929697	1.05458	0.922468	1.07895	1.10704	1.00432	1.06344	1.15282	0.169474
645011506	PREDICTED: COP9 signalosome complex subunit 7b-like isoform X2 [Nasonia vitripennis]	32.1184	5.71924	21.5	2	5	0.908735	1.02241	0.981369	0.970838	1.04567	1.02481	1.01491	1.02846	1.05936	0.169679
156549543	PREDICTED: protein THEM6-like [Nasonia vitripennis]	23.8365	9.42236	34.8	1	7	0.908104	1.0515	0.887613	0.949071	1.09549	1.02526	1.01468	1.04514	1.10122	0.169813
156547657	PREDICTED: dehydrogenase/reductase SDR family member 11-like isoform X2 [Nasonia vitripennis]	27.0553	7.03467	13.36	2	1	0.896335	1.28379	1.12406	1.10139	0.912973	0.921737	0.905007	0.913239	0.829167	0.169818
645021997	PREDICTED: LOW QUALITY PROTEIN: serine/threonine-protein kinase PRP4 homolog [Nasonia vitripennis]	108.312	9.21729	2.59	1	2	0.767947	0.901104	1.08285	0.9173	1.03383	1.09233	1.09369	1.07328	1.17004	0.170136
156554657	PREDICTED: uncharacterized protein LOC100121848 [Nasonia vitripennis]	9.47271	4.88135	34.07	1	2	1.15815	0.947724	1.12932	1.0784	0.919236	1.01951	0.930118	0.956288	0.886767	0.170268
156542785	PREDICTED: bax inhibitor 1 isoform X1 [Nasonia vitripennis]	26.0868	9.0415	5.96	1	1	1.09807	1.03097	1.01856	1.0492	1.05051	0.925364	0.936037	0.970636	0.925118	0.17031
645028315	PREDICTED: uncharacterized protein LOC100678438 [Nasonia vitripennis]	92.6023	5.89697	5.24	1	4	0.976569	0.930243	1.00495	0.970586	0.989486	1.034	1.01476	1.01275	1.04344	0.170956
345498454	PREDICTED: 17-beta-hydroxysteroid dehydrogenase 13-like, partial [Nasonia vitripennis]	31.9198	8.57275	7.48	1	1	1.12514	0.9583	1.06951	1.05099	0.947736	0.987261	0.96683	0.967276	0.920351	0.17178
345495629	PREDICTED: [Pyruvate dehydrogenase (acetyl-transferring)] kinase, mitochondrial [Nasonia vitripennis]	47.5687	7.15186	17.51	1	6	1.10795	1.04907	1.01375	1.05692	1.05259	0.867758	0.950803	0.957052	0.905507	0.171884
645024865	PREDICTED: prostaglandin reductase 1-like [Nasonia vitripennis]	37.7423	7.43018	6.16	1	2	1.00013	1.01579	1.08229	1.03274	0.983646	1.0008	0.985554	0.99	0.958618	0.172489
229892286	uncharacterized protein LOC100123423 precursor [Nasonia vitripennis]	27.6668	9.29053	8.06	1	1	1.32649	0.948001	1.05457	1.10969	0.94242	0.89833	0.924405	0.921718	0.830612	0.172767
645016769	PREDICTED: tryptophan--tRNA ligase, cytoplasmic [Nasonia vitripennis]	47.5502	6.80029	5.95	1	3	0.924463	1.05002	0.920347	0.964945	1.01432	1.0518	1.04771	1.03794	1.07565	0.173819
645006059	PREDICTED: uncharacterized protein LOC100678230 [Nasonia vitripennis]	30.7117	10.0669	9.89	1	2	0.94338	1.00196	0.982741	0.976025	1.06205	1.03584	0.97887	1.02558	1.05078	0.173891
268370120	NADH dehydrogenase [ubiquinone] iron-sulfur protein 7, mitochondrial [Nasonia vitripennis]	24.1904	9.37842	39.63	1	7	1.03446	0.98961	1.06578	1.02995	1.00316	0.965062	0.997347	0.988523	0.959776	0.173912
156547536	PREDICTED: uncharacterized protein LOC100118130 [Nasonia vitripennis]	15.5325	7.1665	16	1	1	1.03239	1.06245	1.07105	1.0553	0.959472	0.874552	1.06019	0.964739	0.914189	0.174522
644999033	PREDICTED: phosphotriesterase-related protein [Nasonia vitripennis]	38.7008	6.63916	24.07	1	6	1.03734	0.946532	1.10492	1.0296	0.951234	0.959038	0.951428	0.9539	0.926477	0.174885
197245400	uncharacterized protein LOC100187594 [Nasonia vitripennis]	109.996	6.22705	3.75	1	3	1.0159	0.971426	0.908183	0.965169	0.991648	1.05021	1.02964	1.02383	1.06078	0.1752
645020915	PREDICTED: UDP-glucose:glycoprotein glucosyltransferase [Nasonia vitripennis]	173.071	5.40186	12.09	1	13	1.02894	0.927174	0.966556	0.974224	1.05011	1.03749	0.999335	1.02898	1.0562	0.175742
644993939	PREDICTED: mannosyl-oligosaccharide glucosidase GCS1 isoform X2 [Nasonia vitripennis]	82.2489	8.104	4.8	2	3	0.978073	0.893671	0.999785	0.957176	0.998235	1.00223	1.05158	1.01735	1.06286	0.175804
644993104	PREDICTED: glutathione S-transferase [Nasonia vitripennis]	22.5399	7.94287	51.49	1	7	1.01319	1.01603	1.08809	1.0391	0.951022	0.98815	1.02133	0.986834	0.949697	0.175851
645018892	PREDICTED: probable elongation factor 1-delta isoform X2 [Nasonia vitripennis]	30.2617	5.10986	52.17	2	12	0.869994	1.03548	0.95811	0.954527	1.0438	1.02822	1.02813	1.03338	1.08261	0.176382
645030456	PREDICTED: baculoviral IAP repeat-containing protein 6 isoform X5 [Nasonia vitripennis]	512.451	6.23975	0.81	5	3	1.14857	1.03797	1.03631	1.07428	1.04999	0.950099	0.991007	0.997033	0.92809	0.176484
156537974	PREDICTED: translation initiation factor eIF-2B subunit epsilon [Nasonia vitripennis]	78.3301	5.04639	3.49	1	2	1.02894	1.00786	1.03903	1.02528	0.966276	0.962991	1.0301	0.986457	0.962137	0.176704
239787140	inosine-uridine preferring nucleoside hydrolase-like precursor [Nasonia vitripennis]	37.6844	4.98291	7.85	1	2	0.763308	0.833394	1.11358	0.903428	1.09412	1.0428	1.10823	1.08172	1.19734	0.176745
345494320	PREDICTED: ectonucleoside triphosphate diphosphohydrolase 5 isoform X3 [Nasonia vitripennis]	56.0839	8.14795	6.53	3	3	0.873978	1.01835	0.990324	0.960883	1.07121	1.00545	1.04201	1.03955	1.08187	0.177407
156545161	PREDICTED: hexaprenyldihydroxybenzoate methyltransferase, mitochondrial [Nasonia vitripennis]	32.2197	7.82568	17.65	1	4	1.0436	0.971621	1.00272	1.00598	0.959806	0.953179	0.989288	0.967424	0.961671	0.17783
156548356	PREDICTED: electron transfer flavoprotein-ubiquinone oxidoreductase, mitochondrial [Nasonia vitripennis]	66.1764	6.90283	25.08	1	11	1.00788	1.02953	1.0136	1.01701	0.985158	1.01789	0.960093	0.987714	0.971196	0.177901
156545752	PREDICTED: serine/arginine-rich splicing factor 1B [Nasonia vitripennis]	28.7391	9.90576	19.84	1	5	1.07319	0.975637	1.00356	1.01746	0.999977	0.950788	0.916769	0.955845	0.939439	0.177922
156552541	PREDICTED: 15 kDa selenoprotein [Nasonia vitripennis]	17.8099	5.60498	16.13	1	3	0.969731	1.00833	0.985663	0.987908	1.03178	0.993182	1.09732	1.04076	1.0535	0.178092
289191335	serine protease 120 precursor [Nasonia vitripennis]	27.9049	6.96143	10.59	2	2	1.11971	1.01625	1.03872	1.05822	0.93355	0.897663	1.05907	0.963428	0.91042	0.178393
345486682	PREDICTED: DNA replication licensing factor Mcm6 [Nasonia vitripennis]	93.0741	5.17334	4.15	1	2	1.13326	1.03868	1.0069	1.05961	1.04258	0.956922	0.848507	0.949337	0.89593	0.179049
156553534	PREDICTED: 28 kDa heat- and acid-stable phosphoprotein [Nasonia vitripennis]	22.8417	9.17334	18.69	1	4	0.932107	1.02776	0.946662	0.968842	1.07688	0.973578	1.08022	1.04356	1.07712	0.179206
156551944	PREDICTED: putative hydroxypyruvate isomerase [Nasonia vitripennis]	29.5421	6.78564	20.08	1	5	0.995616	1.03435	1.0488	1.02625	0.983447	0.915861	1.01608	0.971797	0.946937	0.179489
290565746	cuticular protein LCP family member 2 precursor [Nasonia vitripennis]	41.3011	9.0708	26.49	1	7	1.15007	1.09112	0.938586	1.05992	0.979159	0.916744	0.963461	0.953121	0.899235	0.179565
345482582	PREDICTED: aminopeptidase N-like [Nasonia vitripennis]	112.548	6.94678	10.29	1	8	1.12784	0.987454	1.03099	1.04876	0.980413	0.950575	1.00097	0.977321	0.93188	0.179727
300360558	methylmalonate-semialdehyde dehydrogenase [acylating], mitochondrial [Nasonia vitripennis]	56.1798	8.73389	52.4	1	22	1.08852	0.952248	1.0713	1.03735	0.961532	0.974173	0.967204	0.967636	0.932792	0.180247
345490382	PREDICTED: 60S ribosomal protein L27a [Nasonia vitripennis]	16.8752	10.4917	27.52	1	5	0.874389	0.975251	1.03296	0.960866	0.996793	1.05835	1.08407	1.04641	1.08902	0.182365
345484737	PREDICTED: phosphatidylinositol 5-phosphate 4-kinase type-2 alpha-like [Nasonia vitripennis]	17.8825	4.53857	4.35	1	1	1.03004	0.977178	0.861175	0.95613	1.07538	0.987847	1.09226	1.05183	1.10009	0.182735
356582230	ATPase family AAA domain-containing protein 1-A-like [Nasonia vitripennis]	41.7395	7.81104	14.78	1	4	0.901314	0.982254	1.00955	0.964372	1.06003	1.01109	1.00135	1.02416	1.06199	0.183551
645017870	PREDICTED: isochorismatase domain-containing protein 2, mitochondrial-like [Nasonia vitripennis]	22.4256	7.88428	29.56	1	5	1.01845	1.04417	1.03903	1.03388	1.04232	0.958585	0.967472	0.989458	0.957031	0.183934
345486782	PREDICTED: protein UXT homolog [Nasonia vitripennis]	16.4759	5.59229	7.59	1	1	1.07841	0.952568	1.17104	1.06734	0.972746	0.891958	0.996815	0.95384	0.893661	0.184207
156544490	PREDICTED: serine/threonine-protein phosphatase alpha-2 isoform isoform X1 [Nasonia vitripennis]	37.4658	6.75635	46.95	2	7	1.06673	1.01774	0.995333	1.0266	0.966819	0.989564	1.00748	0.987954	0.962354	0.184687
156555773	PREDICTED: 60S ribosomal protein L37 [Nasonia vitripennis]	10.6007	11.854	32.97	1	4	0.890413	1.06094	0.991264	0.980873	1.01492	1.11734	1.08977	1.07401	1.09495	0.184756
239787132	venom protein Z precursor [Nasonia vitripennis]	17.8764	9.0708	52.6	1	6	0.730498	0.840149	1.12005	0.8969	1.07161	1.11796	1.06373	1.08443	1.20909	0.184844
299782479	dynactin subunit 3 [Nasonia vitripennis]	21.8323	4.7417	23.68	1	4	1.15985	0.975775	1.02997	1.0552	1.00808	0.922191	0.946202	0.958825	0.908667	0.185295
156546322	PREDICTED: regulator of microtubule dynamics protein 1-like [Nasonia vitripennis]	34.2439	8.93896	8.87	1	2	1.06579	1.04171	0.986305	1.03127	0.990514	1.01121	0.951868	0.98453	0.954677	0.185421
156537898	PREDICTED: histone H2B [Nasonia vitripennis]	13.6815	10.2866	58.87	9	5	1.15753	0.946322	1.08645	1.06343	0.974087	0.96467	0.952779	0.963845	0.906351	0.185457
644994424	PREDICTED: leucine-rich PPR motif-containing protein, mitochondrial-like isoform X1 [Nasonia vitripennis]	152.265	6.17627	21.81	2	26	0.917914	1.04984	0.877834	0.948529	0.992834	1.06607	1.05979	1.03957	1.09598	0.185479
645028994	PREDICTED: toll-interacting protein-like [Nasonia vitripennis]	31.4818	5.88428	4.32	1	1	1.13816	0.968946	1.09633	1.06781	1.00542	0.864526	1.00305	0.957665	0.896849	0.185562
289177078	carboxylesterase clade A, member 8 [Nasonia vitripennis]	60.9222	6.85889	7.45	1	3	1.03327	0.956713	1.21692	1.06897	0.945941	0.900231	0.97625	0.940807	0.88011	0.185749
644999573	PREDICTED: acyl-CoA synthetase family member 3, mitochondrial [Nasonia vitripennis]	70.8408	8.20654	24.92	1	12	1.09392	0.978728	1.04057	1.03774	1.00344	0.981302	0.956351	0.980365	0.944712	0.18578
156543114	PREDICTED: m7GpppX diphosphatase [Nasonia vitripennis]	39.8924	6.07471	30.06	1	9	0.974759	1.00483	1.01075	0.996777	1.01105	1.01503	1.01846	1.01485	1.01813	0.186398
156544784	PREDICTED: uncharacterized protein LOC100122681 [Nasonia vitripennis]	12.2235	7.09326	19.49	1	2	0.83941	1.08436	0.68956	0.871109	0.915346	1.22228	1.20087	1.11283	1.27749	0.186402
645031852	PREDICTED: kinesin light chain isoform X4 [Nasonia vitripennis]	62.6788	6.3667	27.47	6	12	0.963033	1.0346	0.907173	0.968268	1.03541	1.00475	1.05338	1.03118	1.06497	0.18658
211904138	APAF1 interacting protein [Nasonia vitripennis]	28.339	6.44287	21.14	1	5	0.938065	0.976857	1.01722	0.977381	1.02764	0.99909	1.02225	1.01633	1.03985	0.186721
645011357	PREDICTED: caprin homolog [Nasonia vitripennis]	65.5874	5.5415	17.67	1	9	0.978632	1.00784	0.967179	0.984549	1.04108	1.04033	0.981986	1.02113	1.03716	0.187133
644991486	PREDICTED: trehalase isoform X2 [Nasonia vitripennis]	77.2155	6.66846	20.12	3	12	1.09072	0.952358	1.11189	1.05166	0.992068	0.944043	0.971491	0.969201	0.921595	0.187466
644996803	PREDICTED: probable ATP-dependent RNA helicase DDX10 [Nasonia vitripennis]	94.2406	6.41748	1.09	1	1	0.839372	1.01018	1.0015	0.950348	1.07805	0.988532	1.08944	1.05201	1.10697	0.187701
345482048	PREDICTED: 2-hydroxyacyl-CoA lyase 1 isoform X2 [Nasonia vitripennis]	59.6657	7.86963	20.07	2	9	0.994706	1.0858	1.00462	1.02838	0.911428	0.995302	0.989931	0.965554	0.938911	0.187737
345483385	PREDICTED: uncharacterized protein LOC100117710 [Nasonia vitripennis]	22.3834	5.09717	15.66	1	2	1.1326	1.19842	0.906674	1.07923	0.959248	0.943983	0.907925	0.937052	0.868258	0.187925
345490491	PREDICTED: T-complex protein 1 subunit beta [Nasonia vitripennis]	57.6431	6.3667	53.75	1	23	0.984158	0.995518	0.993664	0.991113	0.99282	1.00314	1.02375	1.00657	1.01559	0.188058
345497787	PREDICTED: glucose-6-phosphate 1-epimerase isoform X2 [Nasonia vitripennis]	31.8721	7.50342	19.06	2	4	0.877388	0.976107	0.952055	0.935183	1.01856	1.15335	0.950442	1.04078	1.11292	0.188092
645020301	PREDICTED: protein l(2)37Cc [Nasonia vitripennis]	29.83	6.25244	58.46	1	13	1.00985	0.998199	0.997244	1.00176	1.01915	1.0019	1.01592	1.01232	1.01054	0.188421
156550181	PREDICTED: 40S ribosomal protein S2 [Nasonia vitripennis]	29.962	10.2427	47.12	1	13	0.924232	0.993624	1.00893	0.975597	0.994536	1.0418	1.0318	1.02271	1.04829	0.188603
645015644	PREDICTED: arginine--tRNA ligase, cytoplasmic [Nasonia vitripennis]	77.274	7.34229	15.36	1	10	0.929885	1.00232	0.976808	0.969672	0.997989	0.993522	1.04334	1.01162	1.04326	0.188884
645002005	PREDICTED: receptor-type tyrosine-protein phosphatase-like N isoform X2 [Nasonia vitripennis]	88.5223	4.98291	7.16	2	4	1.10262	1.01674	1.00815	1.0425	1.00132	0.979459	0.999908	0.993562	0.953053	0.189237
645034264	PREDICTED: antichymotrypsin-2 isoform X10 [Nasonia vitripennis]	44.1747	6.22705	48.37	11	1	1.40692	0.924162	1.0649	1.13199	0.923861	0.925319	0.861191	0.903457	0.798111	0.189859
645023874	PREDICTED: nardilysin-like [Nasonia vitripennis]	205.878	5.04639	4.49	1	6	0.965239	0.989226	1.00766	0.987376	1.02557	0.989498	1.03315	1.01607	1.02906	0.190489
645012585	PREDICTED: D-aspartate oxidase [Nasonia vitripennis]	29.9626	8.99756	24.54	1	6	1.05244	0.992092	1.05396	1.03283	1.01752	0.996284	0.963572	0.992459	0.960913	0.191517
345486566	PREDICTED: N-(5-amino-5-carboxypentanoyl)-L-cysteinyl-D-valine synthase isoform X3 [Nasonia vitripennis]	96.7597	6.02393	5.26	3	3	1.2724	0.952471	0.987003	1.07062	0.959017	0.796773	0.925133	0.893641	0.834692	0.191663
288856322	cytochrome c oxidase subunit 5B, mitochondrial [Nasonia vitripennis]	13.9329	8.20654	33.61	1	3	0.987357	1.04275	1.04233	1.02415	0.972617	1.00602	0.995554	0.991395	0.968022	0.191704
156550368	PREDICTED: tRNA methyltransferase 112 homolog [Nasonia vitripennis]	13.9941	4.88135	25	1	2	1.17349	1.02269	0.969573	1.05525	0.931815	0.983907	0.95391	0.956544	0.906462	0.191752
156553597	PREDICTED: ADP-ribosylation factor-like protein 8B-A [Nasonia vitripennis]	21.2519	7.29834	19.89	1	2	1.11466	0.985638	1.09473	1.06501	0.98313	0.816387	1.03362	0.944379	0.886733	0.191876
645023096	PREDICTED: NADH dehydrogenase [ubiquinone] iron-sulfur protein 2, mitochondrial isoform X1 [Nasonia vitripennis]	52.6531	6.60986	40.56	4	15	1.07311	0.971989	1.05728	1.03413	1.00136	0.958453	0.983651	0.981155	0.948777	0.191933
156548258	PREDICTED: guanine nucleotide-binding protein subunit beta-like protein isoform X1 [Nasonia vitripennis]	35.7338	7.51807	51.74	2	15	0.983112	0.996796	1.00527	0.995059	0.997722	1.05574	1.01741	1.02362	1.02871	0.191958
345485959	PREDICTED: probable inactive protein kinase DDB_G0270444 [Nasonia vitripennis]	26.4027	4.76709	30.64	1	7	0.933694	1.03454	0.970597	0.979611	1.02598	1.01877	1.03385	1.0262	1.04756	0.192739
345493418	PREDICTED: blastoderm-specific protein 25D-like [Nasonia vitripennis]	86.3191	5.33838	2.38	1	2	1.01022	0.93549	0.971845	0.972517	0.995818	1.0078	1.10471	1.03611	1.06539	0.19293
156544215	PREDICTED: GPN-loop GTPase 1 [Nasonia vitripennis]	42.3943	5.30029	5.29	1	2	0.895612	1.02247	0.989862	0.969316	1.0249	1.05679	1.01436	1.03202	1.06469	0.1931
345489736	PREDICTED: transmembrane protein 214 [Nasonia vitripennis]	77.0083	9.23193	27.96	1	15	0.906328	1.02554	0.944063	0.958643	0.990496	1.08115	1.01258	1.02807	1.07243	0.193897
289191480	serine protease 43 precursor [Nasonia vitripennis]	27.2697	7.06396	35.97	3	6	1.02741	0.9804	1.12979	1.04587	0.919025	0.99765	0.985195	0.96729	0.924867	0.193988
644994857	PREDICTED: tubulin alpha-8 chain-like [Nasonia vitripennis]	27.5677	5.14795	13.41	1	1	1.05795	0.943855	0.895911	0.965906	1.05438	1.04919	1.02323	1.04227	1.07906	0.19425
645014720	PREDICTED: LOW QUALITY PROTEIN: syntaxin-12, partial [Nasonia vitripennis]	25.1124	8.104	12.73	1	2	1.03996	1.04804	1.02481	1.0376	1.05179	0.95433	0.921397	0.97584	0.940475	0.195064
645014113	PREDICTED: methylcytosine dioxygenase TET2 isoform X3 [Nasonia vitripennis]	247.937	6.99072	0.27	3	1	1.0083	0.3321	1.07987	0.806755	1.3003	1.05145	1.2308	1.19418	1.48023	0.195415
345482264	PREDICTED: NHL repeat-containing protein 2 isoform X1 [Nasonia vitripennis]	85.0376	8.11865	11.07	2	7	1.08174	0.961353	1.03715	1.02675	0.989364	0.974946	0.936751	0.96702	0.941829	0.195631
645011165	PREDICTED: uncharacterized protein LOC100678078 [Nasonia vitripennis]	11.1107	5.14795	39.05	1	3	0.998094	0.817768	1.02304	0.946302	1.11139	1.00527	1.05524	1.0573	1.1173	0.195831
289177158	cytochrome P450 336B1 [Nasonia vitripennis]	57.3619	8.66064	15.94	1	7	1.03943	1.135	0.986866	1.05377	1.00699	0.956832	0.984959	0.982927	0.932774	0.196244
156547980	PREDICTED: peptidoglycan recognition protein 1-like isoform X2 [Nasonia vitripennis]	23.5977	6.25244	5.07	2	1	0.906997	0.940395	0.958451	0.935281	1.22669	0.925757	1.06363	1.07203	1.14621	0.196262
345482995	PREDICTED: probable oligoribonuclease [Nasonia vitripennis]	25.5619	7.07861	9.26	1	1	1.15086	1.12687	0.929176	1.06897	0.936492	0.92013	1.00325	0.953291	0.891784	0.196396
345493467	PREDICTED: eukaryotic translation initiation factor 3 subunit C [Nasonia vitripennis]	95.1084	6.26514	30.84	1	23	0.941479	0.986275	1.01288	0.980211	0.996615	1.01457	1.05512	1.0221	1.04274	0.196812
644992462	PREDICTED: uncharacterized protein LOC100678334 [Nasonia vitripennis]	22.3054	6.1001	5.61	1	1	0.968342	1.05823	1.13554	1.05404	0.899472	0.953756	1.02682	0.960017	0.9108	0.19685
156537101	PREDICTED: T-complex protein 1 subunit delta [Nasonia vitripennis]	57.3823	8.1333	49.43	1	21	0.894148	1.00966	0.988305	0.964037	1.00818	1.05899	1.00757	1.02491	1.06315	0.196886
156554641	PREDICTED: probable splicing factor, arginine/serine-rich 7 isoform X2 [Nasonia vitripennis]	57.7484	11.0483	2.59	2	1	0.986616	1.02289	0.951698	0.987067	1.02577	1.02834	1.00722	1.02044	1.03381	0.197208
645041583	PREDICTED: mannose-1-phosphate guanyltransferase beta isoform X2 [Nasonia vitripennis]	38.5658	7.75244	7.6	2	2	0.841534	1.06572	0.930831	0.946029	1.01632	1.07239	1.06105	1.04992	1.10982	0.197924
345483081	PREDICTED: 15-hydroxyprostaglandin dehydrogenase [NAD(+)]-like [Nasonia vitripennis]	28.9165	6.13818	25.19	1	6	1.03439	1.0598	0.984128	1.02611	0.998822	0.948874	1.00118	0.98296	0.957951	0.198475
645012651	PREDICTED: adenine phosphoribosyltransferase [Nasonia vitripennis]	19.3785	8.06006	23.16	1	3	1.00614	0.970912	1.10851	1.02852	1.00833	0.91837	0.927366	0.951354	0.924971	0.199142
239787134	venom protein U precursor [Nasonia vitripennis]	23.513	4.83057	41.75	1	7	0.742928	0.878633	1.09568	0.905747	1.05127	1.13989	1.02549	1.07222	1.18379	0.199461
283046826	diphenol oxidase 1 [Nasonia vitripennis]	79.2495	6.87354	34.01	2	23	0.970377	1.02032	1.13539	1.04203	0.903091	0.988074	0.978192	0.956452	0.917873	0.199505
156540304	PREDICTED: glycerol-3-phosphate dehydrogenase, mitochondrial isoform X1 [Nasonia vitripennis]	80.1073	8.03076	48.12	2	30	1.00425	0.98724	1.0764	1.02263	1.00422	0.958807	0.962361	0.975129	0.953551	0.199929
345494863	PREDICTED: zinc finger protein on ecdysone puffs isoform X2 [Nasonia vitripennis]	78.6448	6.1001	9.67	2	7	0.982635	0.991321	0.985252	0.986403	1.03095	1.03513	0.978121	1.01473	1.02872	0.200932
645039458	PREDICTED: ferritin heavy polypeptide-like 17 [Nasonia vitripennis]	24.9536	6.52197	47.51	1	9	1.08278	1.14488	0.934415	1.05402	0.943379	1.00721	0.877701	0.942765	0.894443	0.20103
645017329	PREDICTED: la protein homolog isoform X1 [Nasonia vitripennis]	47.9646	6.43018	26.33	2	10	0.899042	1.02525	0.978689	0.967661	1.00276	1.07646	1.02092	1.03338	1.06792	0.20116
345484055	PREDICTED: kinetochore protein NDC80 homolog [Nasonia vitripennis]	79.5828	9.0708	4.91	1	2	0.981558	1.01781	0.917205	0.97219	0.998877	1.08063	1.01388	1.03113	1.06063	0.202295
645001578	PREDICTED: long-chain fatty acid transport protein 4 isoform X2 [Nasonia vitripennis]	80.5169	8.45557	24.39	2	14	0.939908	1.03384	0.964711	0.979487	1.05624	1.01223	1.01421	1.02756	1.04908	0.202356
156537125	PREDICTED: myb-binding protein 1A-like protein [Nasonia vitripennis]	137.647	6.49365	0.98	1	1	0.968186	0.983238	0.877387	0.942937	0.932091	1.15861	1.07512	1.05527	1.11914	0.203321
645033366	PREDICTED: NAD-dependent protein deacetylase sirtuin-2 [Nasonia vitripennis]	50.1196	6.44287	2.26	1	1	0.785069	1.08116	0.92988	0.932038	1.04167	1.05981	1.08916	1.06355	1.1411	0.203464
645013671	PREDICTED: ubiquitin conjugation factor E4 B isoform X2 [Nasonia vitripennis]	130.341	6.40479	1.12	2	1	1.10848	1.00488	1.13671	1.08336	0.864484	0.852188	1.10992	0.942197	0.869702	0.203709
156537045	PREDICTED: nucleolar protein 58 [Nasonia vitripennis]	63.9887	8.14795	7.34	1	3	0.997463	1.0172	0.900565	0.971743	0.991898	1.09931	1.04041	1.04387	1.07423	0.20408
645014242	PREDICTED: annexin B9-like isoform X3 [Nasonia vitripennis]	35.9395	5.77002	69.44	2	1	0.683792	1.00986	0.961894	0.885184	1.00435	1.28068	0.997677	1.09424	1.23617	0.204197
283046811	Kazal type serine protease inhibitor-like venom protein 2 precursor [Nasonia vitripennis]	9.62424	4.05615	48.28	1	3	0.707125	0.77414	1.10753	0.86293	1.26834	0.997999	1.01196	1.09277	1.26634	0.204653
156551257	PREDICTED: 40S ribosomal protein S25 [Nasonia vitripennis]	13.3706	10.3599	31.09	1	4	1.00624	1.02221	1.07962	1.03602	1.01424	1.00379	0.914403	0.977478	0.94349	0.205183
156550340	PREDICTED: ATP-dependent RNA helicase WM6 [Nasonia vitripennis]	48.7329	5.93506	43.76	4	4	1.03075	0.987765	0.997701	1.0054	0.990174	0.984098	0.982147	0.985473	0.980176	0.205975
156554623	PREDICTED: lachesin [Nasonia vitripennis]	40.2446	7.63525	25.21	1	6	1.0893	1.00495	1.02084	1.03836	0.984723	1.02586	0.899781	0.970121	0.934278	0.206024
644999184	PREDICTED: acetyl-CoA carboxylase isoform X7 [Nasonia vitripennis]	255.813	6.37939	18.71	7	31	0.946872	1.01584	0.965137	0.975949	1.01126	1.01261	0.999173	1.00768	1.03252	0.206463
345480729	PREDICTED: heat shock protein 83 [Nasonia vitripennis]	82.9299	5.05908	54.22	3	27	0.86546	1.06146	0.928119	0.95168	0.998861	1.06253	1.07582	1.04574	1.09884	0.206689
645000524	PREDICTED: uncharacterized protein LOC100679580 [Nasonia vitripennis]	47.4172	4.91943	6.86	1	2	1.10715	1.08751	0.977903	1.05752	0.973468	1.0405	0.907955	0.973975	0.920999	0.206745
644995559	PREDICTED: protein PFF0380w-like isoform X3 [Nasonia vitripennis]	83.6333	6.1001	7.16	3	3	1.20166	0.963771	1.00258	1.056	0.89303	0.971178	0.954529	0.939579	0.88975	0.207079
156549740	PREDICTED: protein VAC14 homolog [Nasonia vitripennis]	78.6954	5.94775	3.02	1	1	1.06313	0.975289	1.05416	1.03086	0.954602	1.01232	0.979004	0.981975	0.952579	0.207389
645026636	PREDICTED: uncharacterized protein LOC100678738 isoform X2 [Nasonia vitripennis]	89.4383	6.93213	4.77	2	3	1.22656	1.14994	0.898884	1.09179	0.971587	0.883797	0.957567	0.937651	0.858817	0.207547
308198387	Chain A, Solution Structure Of Nasonin-1	3.55848	8.01611	72.73	5	3	1.53805	1.62759	0.624346	1.26333	0.793284	0.821582	0.725785	0.780217	0.617589	0.207677
645027590	PREDICTED: beta-galactosidase-like [Nasonia vitripennis]	71.6321	6.55127	6.84	1	5	0.877066	0.978878	1.00844	0.954794	1.01109	0.991657	1.06952	1.02409	1.07258	0.20769
156538557	PREDICTED: methenyltetrahydrofolate synthase domain-containing protein [Nasonia vitripennis]	67.6404	8.74854	6.27	1	3	0.991981	1.01936	0.89604	0.969127	1.0875	1.00083	1.02388	1.0374	1.07045	0.207808
645020896	PREDICTED: dynactin subunit 1 isoform X3 [Nasonia vitripennis]	145.425	5.8208	12.86	4	13	0.996462	0.988645	0.952524	0.97921	1.03876	1.00895	0.983832	1.01051	1.03197	0.207852
156548610	PREDICTED: peroxiredoxin-6-like [Nasonia vitripennis]	24.8106	5.46533	37.73	1	6	1.03071	1.00477	1.01326	1.01625	0.973606	1.00164	1.01176	0.995668	0.97975	0.208279
644992452	PREDICTED: charged multivesicular body protein 5 [Nasonia vitripennis]	24.4031	4.81787	19.46	1	3	0.982188	1.00551	0.859665	0.949121	1.03713	0.997487	1.02251	1.01904	1.07367	0.208599
345482276	PREDICTED: COMM domain-containing protein 5 [Nasonia vitripennis]	23.4085	7.94287	8.37	1	1	1.03904	1.07827	1.03258	1.04996	0.896133	0.932998	1.07199	0.967039	0.921023	0.208864
645021886	PREDICTED: U4/U6.U5 tri-snRNP-associated protein 2-like, partial [Nasonia vitripennis]	43.6587	8.47021	8.53	2	2	1.16288	0.98886	1.00016	1.05063	0.984263	0.961853	0.949263	0.965126	0.918613	0.208879
289191337	serine protease 122 precursor [Nasonia vitripennis]	31.189	6.7417	7.99	1	2	1.03004	0.931531	1.31125	1.09094	0.973978	0.895844	0.874574	0.914799	0.838544	0.208894
645033372	PREDICTED: probable 2-oxoglutarate dehydrogenase E1 component DHKTD1 homolog, mitochondrial isoform X2 [Nasonia vitripennis]	105.235	6.93213	13.87	2	10	1.05219	1.06841	0.973352	1.03132	1.0108	0.93297	0.983406	0.975725	0.946096	0.209061
644996096	PREDICTED: protein translation factor SUI1 homolog [Nasonia vitripennis]	12.3803	6.771	30	1	3	0.908168	1.04232	0.883988	0.944825	0.982362	1.02691	1.0776	1.02896	1.08905	0.210102
300117074	apolipoprotein O-like [Nasonia vitripennis]	27.3522	8.35303	33.46	1	6	1.02068	0.987728	1.0576	1.022	0.990152	0.946495	1.00776	0.981468	0.960336	0.21016
289177000	glutathione S-transferase O1 [Nasonia vitripennis]	27.7025	7.02002	19.92	2	5	1.01535	0.978269	1.01618	1.00327	0.963635	0.998653	0.975074	0.979121	0.975933	0.210437
645028785	PREDICTED: proteasome subunit alpha type-4 isoform X1 [Nasonia vitripennis]	28.6575	6.78564	49.03	2	9	0.940619	1.00475	0.993079	0.979483	1.00367	1.03925	0.999938	1.01429	1.03553	0.210606
156543249	PREDICTED: exportin-2 [Nasonia vitripennis]	109.132	5.65576	20.37	1	14	0.884882	1.03274	0.955342	0.957656	1.01505	1.055	1.00529	1.02511	1.07044	0.210911
289177018	glutathione S-transferase T3 [Nasonia vitripennis]	25.7635	7.53271	7.24	1	1	1.09035	0.996518	1.02418	1.03701	1.01482	0.933114	0.996923	0.981618	0.946582	0.211472
645016529	PREDICTED: glutamine synthetase 2 cytoplasmic [Nasonia vitripennis]	41.4787	6.93213	38.98	1	11	0.999569	1.03198	1.04448	1.02534	0.963129	1.02556	0.986663	0.991785	0.96727	0.21165
156551153	PREDICTED: UPF0568 protein C14orf166 homolog [Nasonia vitripennis]	28.0676	8.26514	3.64	1	1	1.07471	1.03121	0.997529	1.03448	0.985773	0.932608	1.02746	0.981949	0.949217	0.211875
156537243	PREDICTED: protein disulfide-isomerase [Nasonia vitripennis]	55.7061	4.83057	70.56	2	33	0.932774	0.997969	0.96687	0.965871	0.962137	1.02977	1.0893	1.02707	1.06336	0.212314
645025390	PREDICTED: cullin-2 [Nasonia vitripennis]	86.2954	7.03467	14.76	1	8	0.984364	1.02959	0.91735	0.977101	1.02612	1.05226	1.00853	1.02897	1.05308	0.212394
645027867	PREDICTED: ribokinase-like [Nasonia vitripennis]	32.8353	6.53662	14.56	1	4	0.927605	0.967847	1.01083	0.968761	0.962304	1.06133	1.06877	1.0308	1.06404	0.212744
645023680	PREDICTED: uncharacterized protein LOC100680141 isoform X1 [Nasonia vitripennis]	113.089	8.89502	30.1	2	22	0.832943	1.04158	0.963569	0.946029	1.03205	1.08775	1.00818	1.04266	1.10214	0.212842
156548856	PREDICTED: uncharacterized protein LOC100122554 [Nasonia vitripennis]	11.5447	7.12256	33.66	1	4	0.748177	0.915265	1.10652	0.923321	1.11687	1.03304	1.09165	1.08052	1.17026	0.213827
156547516	PREDICTED: V-type proton ATPase subunit d [Nasonia vitripennis]	39.5717	4.91943	34.77	1	8	1.03577	0.95919	1.03199	1.00898	0.993752	0.963946	0.937431	0.965043	0.95645	0.213858
645015173	PREDICTED: dnaJ homolog subfamily B member 6 isoform X2 [Nasonia vitripennis]	32.7613	9.18799	8.3	2	2	1.14267	0.900482	1.12026	1.05447	0.940432	0.953339	0.925576	0.939782	0.891235	0.213879
273033244	cuticular protein, partial [Nasonia vitripennis]	4.85368	8.66064	17.78	2	1	1.20493	1.00983	0.979581	1.06478	0.98224	0.964795	0.926271	0.957769	0.899497	0.214114
289177143	cytochrome P450 4AB6 [Nasonia vitripennis]	59.5441	7.88428	14.51	16	5	0.97207	1.04334	1.01517	1.01019	0.976986	0.969467	0.989036	0.978496	0.968624	0.214306
644991421	PREDICTED: egalitarian isoform X2 [Nasonia vitripennis]	93.5805	5.77002	1.82	2	1	1.07758	1.04954	1.04367	1.05693	1.07257	0.861116	0.963144	0.96561	0.913599	0.214434
345479331	PREDICTED: eukaryotic translation initiation factor 3 subunit D isoform X2 [Nasonia vitripennis]	62.757	6.34131	23.02	2	10	0.895328	0.995409	0.971397	0.954045	0.976094	1.07303	0.998018	1.01572	1.06464	0.216713
645026831	PREDICTED: coatomer subunit alpha isoform X2 [Nasonia vitripennis]	135.614	8.04541	12.51	4	15	0.92058	1.03675	0.959647	0.972326	1.01317	1.00585	1.08169	1.03357	1.06299	0.21683
156554516	PREDICTED: 28S ribosomal protein S7, mitochondrial isoform X2 [Nasonia vitripennis]	27.1122	9.59814	5.6	2	1	0.987764	0.984962	0.953532	0.975419	0.972592	1.02324	1.09958	1.03181	1.05781	0.216945
645026402	PREDICTED: sterile alpha and TIR motif-containing protein 1, partial [Nasonia vitripennis]	95.1814	6.60986	2.81	1	1	1.07985	0.997473	1.01889	1.03207	0.93665	1.00088	1.0103	0.982612	0.952077	0.217539
156537283	PREDICTED: hsp70-binding protein 1 [Nasonia vitripennis]	40.5104	5.0083	17.4	1	4	1.05064	0.993515	0.995958	1.01337	0.994448	0.991873	0.953673	0.979998	0.967068	0.217726
345496540	PREDICTED: coatomer subunit beta' [Nasonia vitripennis]	105.094	5.32568	18.88	1	15	0.942346	1.01882	0.976174	0.979112	0.990293	1.01955	1.0519	1.02058	1.04235	0.217899
645010667	PREDICTED: uncharacterized protein LOC100122512 isoform X2 [Nasonia vitripennis]	45.4019	4.77979	2.96	2	1	1.29774	0.97368	1.03133	1.10092	1.04756	0.860699	0.88818	0.932145	0.8467	0.217956
345486414	PREDICTED: heterogeneous nuclear ribonucleoprotein U-like protein 1 [Nasonia vitripennis]	127.232	8.52881	6.17	1	7	0.998851	0.988108	0.988722	0.991894	1.01996	0.985925	1.03216	1.01268	1.02096	0.218798
156544903	PREDICTED: cardiomyopathy-associated protein 5-like isoform X2 [Nasonia vitripennis]	23.2291	7.47412	14.29	2	3	1.03118	1.11058	1.02094	1.05423	1.00297	1.03339	0.852797	0.96305	0.91351	0.218955
645017476	PREDICTED: LOW QUALITY PROTEIN: sodium/potassium-transporting ATPase subunit alpha-like [Nasonia vitripennis]	115.394	5.87158	51.44	1	46	1.09166	0.971334	1.02538	1.02946	0.973397	0.995087	0.962428	0.976971	0.949015	0.219578
156552432	PREDICTED: uncharacterized protein LOC100116105 [Nasonia vitripennis]	45.7876	5.69385	7.23	1	2	1.03682	1.02243	1.10473	1.05466	0.844431	0.945137	1.06968	0.953084	0.903689	0.219921
156543654	PREDICTED: proteasome subunit beta type-7 [Nasonia vitripennis]	29.9111	7.89893	36.82	1	9	0.925122	0.975463	1.02334	0.97464	1.0158	0.998139	1.05027	1.0214	1.04798	0.220342
156554190	PREDICTED: reticulon-4-interacting protein 1 homolog, mitochondrial [Nasonia vitripennis]	43.3446	8.45557	6.11	1	2	0.998189	1.00923	1.01277	1.00673	1.00833	0.914079	0.975923	0.966111	0.959653	0.220408
345488087	PREDICTED: 1-acyl-sn-glycerol-3-phosphate acyltransferase beta [Nasonia vitripennis]	31.2766	9.51025	16.3	1	3	0.788959	0.974862	0.96283	0.908884	0.896967	1.09648	1.19871	1.06405	1.17072	0.220763
645017293	PREDICTED: dihydrolipoyllysine-residue succinyltransferase component of 2-oxoglutarate dehydrogenase complex, mitochondrial isoform X2 [Nasonia vitripennis]	51.9443	9.26123	32.78	2	15	1.03346	0.98344	1.0495	1.02213	0.996563	0.956737	1.00507	0.986122	0.964768	0.220915
645000444	PREDICTED: protein unc-13 homolog D [Nasonia vitripennis]	138.179	5.05908	3	1	3	1.09753	1.02194	0.998083	1.03919	1.00571	0.99631	0.982052	0.994692	0.957184	0.221524
156543987	PREDICTED: 60S ribosomal protein L10 [Nasonia vitripennis]	25.1101	10.0522	47.25	1	9	0.96748	0.999015	0.979183	0.981893	0.977551	1.01829	1.02643	1.00742	1.026	0.22266
645005705	PREDICTED: kinesin-like protein Klp10A, partial [Nasonia vitripennis]	45.8021	9.33447	7.37	1	3	0.915726	1.04511	0.836466	0.932435	0.95555	1.0767	1.08356	1.0386	1.11386	0.222943
645018603	PREDICTED: ATP-binding cassette sub-family B member 10, mitochondrial-like, partial [Nasonia vitripennis]	70.5955	9.33447	6.68	1	3	1.02211	0.995023	1.05961	1.02558	0.968859	1.01279	0.996914	0.992855	0.96809	0.222944
345488679	PREDICTED: aspartate--tRNA ligase, mitochondrial [Nasonia vitripennis]	74.2409	7.03467	4.31	1	2	1.07356	0.987332	1.08799	1.04963	0.947278	1.05125	0.949289	0.982604	0.936144	0.223234
289177160	cytochrome P450 6AQ4 [Nasonia vitripennis]	58.6086	8.51416	41.57	1	13	0.960089	0.944023	1.52085	1.14166	0.939274	0.83384	0.816415	0.863176	0.756074	0.223507
156540674	PREDICTED: 40S ribosomal protein S5 [Nasonia vitripennis]	24.0967	9.42236	38.14	1	7	0.919911	1.01492	0.971632	0.96882	0.962526	1.07072	1.06569	1.03298	1.06623	0.224424
345479184	PREDICTED: serine--tRNA ligase, mitochondrial [Nasonia vitripennis]	53.7439	6.88818	3.35	1	1	0.995394	0.915945	0.945007	0.952115	0.921539	1.1131	1.11567	1.0501	1.10291	0.224967
645002325	PREDICTED: adenosine kinase 2 [Nasonia vitripennis]	34.633	6.78564	23.57	1	6	0.869809	0.982103	0.978704	0.943539	1.00537	0.961769	1.09919	1.02211	1.08327	0.224992
345488292	PREDICTED: methionine--tRNA ligase, cytoplasmic [Nasonia vitripennis]	108.061	8.32373	16.63	1	14	0.925227	1.01219	1.01109	0.982837	1.06466	1.00453	1.0245	1.03123	1.04924	0.225478
156543963	PREDICTED: up-regulated during skeletal muscle growth protein 5 [Nasonia vitripennis]	5.76211	10.2134	48.15	1	2	1.09251	0.953803	1.05582	1.03404	1.01586	0.954729	0.910608	0.960399	0.928781	0.226001
645029606	PREDICTED: acyl-CoA Delta(11) desaturase-like isoform X2 [Nasonia vitripennis]	38.1081	9.34912	10.06	2	3	1.02633	0.984781	0.763852	0.924986	1.00671	1.04411	1.08692	1.04591	1.13073	0.226498
645013068	PREDICTED: UMP-CMP kinase isoform X2 [Nasonia vitripennis]	23.0887	8.66064	29.81	2	7	0.875628	1.07086	0.900044	0.948845	0.986539	1.07395	1.07845	1.04631	1.10272	0.226804
345491557	PREDICTED: uncharacterized protein LOC100678292 [Nasonia vitripennis]	11.3852	4.28467	16.19	1	2	1.10447	0.968135	1.06526	1.04596	1.03189	0.917634	0.964434	0.971319	0.928643	0.227184
644996167	PREDICTED: beta-parvin isoform X2 [Nasonia vitripennis]	51.5309	5.35107	7.64	2	3	1.07837	0.972604	1.01009	1.02036	0.976065	0.915837	0.999574	0.963826	0.944598	0.22808
644993394	PREDICTED: fasciclin-1 isoform X1 [Nasonia vitripennis]	76.7708	7.62061	30.45	3	20	1.09794	0.982644	0.990427	1.02367	0.973821	0.975315	0.962244	0.97046	0.948021	0.228211
345490213	PREDICTED: phosphoglycolate phosphatase-like [Nasonia vitripennis]	34.3079	7.32764	5.21	1	1	0.938382	1.12943	1.15149	1.0731	0.99199	0.831313	1.01628	0.946529	0.882052	0.228647
644992510	PREDICTED: heat shock 70 kDa protein 4L isoform X2 [Nasonia vitripennis]	92.8637	5.60498	39.52	3	29	0.99196	1.01079	0.945064	0.982604	1.03693	1.03552	0.985375	1.01927	1.03732	0.229335
644992652	PREDICTED: poly(rC)-binding protein 3 isoform X1 [Nasonia vitripennis]	62.607	9.42236	19.83	2	9	0.981593	1.01195	0.881903	0.958482	1.0145	0.996195	1.04022	1.01697	1.06102	0.229691
345497932	PREDICTED: uncharacterized protein LOC100678580 [Nasonia vitripennis]	18.1145	7.40088	19.41	1	3	0.935948	1.00132	0.915925	0.951063	0.945298	1.028	1.06932	1.01421	1.06639	0.230253
345487020	PREDICTED: signal recognition particle 19 kDa protein isoform X2 [Nasonia vitripennis]	15.6133	10.1841	17.27	2	2	0.944437	1.0568	0.92674	0.975993	1.02296	1.05996	1.02512	1.03601	1.0615	0.230328
645028094	PREDICTED: polyadenylate-binding protein 4-like [Nasonia vitripennis]	69.7093	9.46631	31.42	1	18	0.921214	1.05229	0.911926	0.961811	1.00672	1.04045	1.03527	1.02748	1.06828	0.230885
156541540	PREDICTED: isochorismatase domain-containing protein 2, mitochondrial-like [Nasonia vitripennis]	21.302	7.92822	28.65	1	4	1.12965	1.02106	1.07397	1.07489	1.03077	0.801441	1.03797	0.956727	0.890069	0.231144
645007238	PREDICTED: fatty acyl-CoA reductase 1-like [Nasonia vitripennis]	58.2997	6.65381	11.8	1	5	1.07958	1.14734	0.954942	1.06062	1.0117	0.976303	0.940253	0.976084	0.920296	0.231632
645026793	PREDICTED: microtubule-actin cross-linking factor 1 isoform X1 [Nasonia vitripennis]	676.222	6.0874	29.84	2	2	1.13778	0.972247	1.02216	1.04406	1.00402	0.96193	0.946813	0.970919	0.929942	0.231721
345482459	PREDICTED: CDGSH iron-sulfur domain-containing protein 3, mitochondrial [Nasonia vitripennis]	16.6364	9.62744	20.28	1	3	0.922929	1.03429	0.966864	0.974694	1.04404	1.0659	0.984925	1.03162	1.05841	0.231779
193788701	solute carrier family 5 (choline transporter)-like [Nasonia vitripennis]	64.0155	4.88135	3.37	1	2	1.0938	0.94949	1.0866	1.0433	0.927495	1.00451	0.977775	0.969928	0.929676	0.231803
156547189	PREDICTED: sodium/potassium-transporting ATPase subunit beta-2-like [Nasonia vitripennis]	36.0889	7.7085	49.84	1	14	1.05333	0.990026	1.08843	1.04393	0.952424	1.01225	1.0171	0.993927	0.952102	0.231971
645013965	PREDICTED: dnaJ homolog subfamily A member 1 [Nasonia vitripennis]	44.5783	6.11279	41.41	1	16	0.929434	1.03674	0.961488	0.975886	1.01355	1.06058	1.00595	1.02669	1.05206	0.232062
229892296	oxoglutarate (alpha-ketoglutarate) dehydrogenase (lipoamide) [Nasonia vitripennis]	115.273	7.23975	47.99	1	43	1.02627	0.97746	1.04913	1.01762	0.996353	0.965388	0.992852	0.984865	0.967811	0.232388
345480293	PREDICTED: beta-glucuronidase-like [Nasonia vitripennis]	76.0094	6.18896	10.81	1	7	1.05293	0.965346	0.789341	0.935872	1.02556	1.03192	1.0871	1.04819	1.12002	0.232654
156540632	PREDICTED: small nuclear ribonucleoprotein-associated protein B isoform X3 [Nasonia vitripennis]	22.8251	11.0776	18.89	3	3	1.15506	1.07473	0.969589	1.06646	1.00194	0.950408	1.00822	0.986857	0.925359	0.233273
644993845	PREDICTED: serine protease 87 isoform X1 [Nasonia vitripennis]	31.1457	7.40088	16.79	2	4	0.724843	0.814643	1.13858	0.892688	1.15863	1.08972	0.994865	1.08107	1.21103	0.233402
645041970	PREDICTED: myosin-2 essential light chain [Nasonia vitripennis]	16.5171	4.729	56.46	1	6	0.997188	1.0775	1.01356	1.02942	0.99242	0.96759	1.01194	0.990651	0.962343	0.233708
345495964	PREDICTED: ras-related protein Rab-32-like [Nasonia vitripennis]	15.772	6.01123	13.77	1	2	1.00082	1.03372	1.05208	1.02887	0.988034	0.932905	1.03092	0.983952	0.956338	0.234083
645039181	PREDICTED: 60S ribosomal protein L29 [Nasonia vitripennis]	8.3046	11.6929	38.03	1	3	0.989952	1.00864	1.10111	1.03323	0.978294	0.98739	0.989054	0.984913	0.953236	0.234238
645023107	PREDICTED: endothelin-converting enzyme 1-like, partial [Nasonia vitripennis]	82.3314	6.90283	26.45	1	18	1.00649	1.01877	0.839456	0.954906	1.03517	1.00821	1.07907	1.04082	1.08997	0.234373
644993238	PREDICTED: uncharacterized protein LOC103315527 [Nasonia vitripennis]	201.502	7.03467	0.91	1	1	0.896318	0.999342	1.65896	1.18487	0.799981	0.782474	0.946539	0.842998	0.711467	0.23458
266634746	serpin 5 precursor [Nasonia vitripennis]	49.28	6.63916	35.29	1	15	1.07418	1.02356	0.981095	1.02628	1.02149	0.958664	0.953191	0.977783	0.952747	0.234769
645005129	PREDICTED: serine/threonine-protein phosphatase 2B catalytic subunit alpha isoform-like isoform X2 [Nasonia vitripennis]	104.53	5.26221	6.65	2	4	1.10062	1.00897	1.02855	1.04605	1.03694	0.994505	0.946831	0.992759	0.949059	0.234783
645013946	PREDICTED: venom acid phosphatase Acph-1-like [Nasonia vitripennis]	42.4077	7.47412	8.4	3	3	0.987704	1.10849	0.979282	1.02516	0.989352	0.961798	0.939006	0.963385	0.939742	0.234784
645026331	PREDICTED: innexin inx1 [Nasonia vitripennis]	42.0246	7.37158	14.05	1	5	0.920641	0.992324	0.984555	0.96584	1.03906	0.99442	0.983103	1.00553	1.04109	0.235042
644993196	PREDICTED: LOW QUALITY PROTEIN: uncharacterized protein LOC100118388 [Nasonia vitripennis]	487.432	6.44287	10.89	1	38	1.07322	1.0013	1.00277	1.02576	1.03148	0.942311	0.946214	0.973336	0.94889	0.235118
156555511	PREDICTED: uncharacterized protein LOC100120883 [Nasonia vitripennis]	39.4726	5.50342	5.59	1	2	1.25021	1.35174	0.79546	1.13247	0.861482	0.880139	0.935019	0.892214	0.787847	0.235999
645015266	PREDICTED: phosphoribosylformylglycinamidine synthase [Nasonia vitripennis]	144.668	6.11279	31.34	1	32	0.995304	1.03737	1.02261	1.01843	0.975163	1.01986	0.983207	0.992744	0.974779	0.236657
645028679	PREDICTED: bifunctional glutamate/proline--tRNA ligase, partial [Nasonia vitripennis]	129.201	8.67529	18.75	1	20	0.885144	1.04062	0.969327	0.965029	1.01177	1.03309	1.04111	1.02865	1.06593	0.236924
645038579	PREDICTED: vesicle transport protein SEC20 [Nasonia vitripennis]	25.6728	8.67529	5.73	1	1	1.03838	1.13407	0.990022	1.05416	0.892022	0.935173	1.06065	0.962615	0.913161	0.237425
345486241	PREDICTED: cytochrome P450 6k1 [Nasonia vitripennis]	64.4686	8.92432	11.11	1	4	0.960656	1.12171	1.00443	1.02893	0.906838	0.97433	0.982468	0.954545	0.927703	0.23838
645023578	PREDICTED: exocyst complex component 8-like, partial [Nasonia vitripennis]	32.537	6.69775	5.92	1	1	1.33345	0.994662	0.979371	1.10249	1.00898	0.939098	0.835936	0.928006	0.841733	0.238396
645027179	PREDICTED: vacuolar protein sorting-associated protein 33A [Nasonia vitripennis]	67.4653	5.73193	3.67	1	2	1.09042	0.992167	1.01832	1.03363	0.91314	1.03545	0.96083	0.969807	0.93825	0.238853
645014623	PREDICTED: coatomer subunit beta [Nasonia vitripennis]	105.749	5.77002	22.94	1	19	1.01883	0.967452	0.967012	0.984431	1.02135	0.986816	1.04486	1.01768	1.03377	0.239561
156548582	PREDICTED: bifunctional purine biosynthesis protein PURH [Nasonia vitripennis]	64.3092	8.03076	65.71	1	29	0.981529	0.999803	1.09739	1.02624	0.947834	0.989418	0.983181	0.973478	0.948587	0.239586
645007700	PREDICTED: uncharacterized protein LOC103317915 [Nasonia vitripennis]	28.6325	5.47803	12.84	1	3	0.83196	0.809452	1.12376	0.921725	1.05074	1.06628	1.06634	1.06112	1.15123	0.241056
156538805	PREDICTED: uncharacterized protein LOC100124103 [Nasonia vitripennis]	52.6179	6.63916	20.5	1	8	1.01515	0.978434	1.05157	1.01505	0.994827	0.988408	0.969246	0.98416	0.969565	0.241135
345484759	PREDICTED: protein phosphatase 1 regulatory subunit 12A isoform X3 [Nasonia vitripennis]	109.428	7.04932	2.81	3	3	1.03167	0.970059	0.914325	0.972017	0.983296	1.0681	1.03762	1.02967	1.05932	0.241712
239787116	venom protein Q precursor [Nasonia vitripennis]	18.9519	8.60205	40.85	1	8	0.807319	0.9111	1.09279	0.93707	1.04825	1.06917	1.03923	1.05221	1.12288	0.241845
645007480	PREDICTED: probable 5-hydroxyisourate hydrolase R09H10.3 [Nasonia vitripennis]	15.6421	9.11475	12.41	1	1	1.18966	0.929214	1.07901	1.06596	1.00574	0.950393	0.911448	0.95586	0.896711	0.242091
156540958	PREDICTED: neurofilament heavy polypeptide-like [Nasonia vitripennis]	26.3358	4.99561	29.55	1	6	0.979633	1.0135	0.901163	0.964765	1.07488	0.999964	0.993197	1.02268	1.06003	0.24308
300116734	cytochrome c oxidase assembly protein COX15 homolog [Nasonia vitripennis]	47.9641	9.80322	6.46	1	2	0.941076	1.03908	0.933199	0.971119	0.997791	1.12044	1.00831	1.04218	1.07317	0.243276
289329613	serine protease 52 precursor [Nasonia vitripennis]	30.8379	7.73779	28.22	1	6	1.02862	0.907345	0.984757	0.973574	1.01776	0.996447	1.12015	1.04479	1.07315	0.24347
229577195	luciferase-like [Nasonia vitripennis]	57.6797	8.33838	7.16	2	3	1.10135	0.905696	1.21778	1.07494	0.96534	0.974928	0.898836	0.946368	0.880389	0.243781
156544968	PREDICTED: uncharacterized protein LOC100114386 [Nasonia vitripennis]	16.3558	4.61475	16.31	1	2	1.06983	1.0528	0.967505	1.03004	1.0209	0.895681	0.975797	0.964126	0.936004	0.244879
156550358	PREDICTED: vitellogenin-like [Nasonia vitripennis]	203.161	7.6792	45.24	1	60	0.725936	1.02098	1.0317	0.926205	1.09751	1.06351	1.03341	1.06481	1.14965	0.245296
156552930	PREDICTED: uncharacterized protein LOC100117670 [Nasonia vitripennis]	12.1861	7.66455	43.64	1	5	0.981287	0.991973	0.98533	0.986197	0.99384	0.991293	1.04223	1.00912	1.02325	0.245554
644994328	PREDICTED: GPI mannosyltransferase 3 [Nasonia vitripennis]	58.0272	8.92432	6.72	3	3	0.855364	1.0532	0.96753	0.958697	1.03627	1.04982	1.02523	1.03711	1.08179	0.245883
156543012	PREDICTED: aromatic-L-amino-acid decarboxylase [Nasonia vitripennis]	54.4798	6.34131	26.61	1	10	1.04873	1.06108	0.985979	1.03193	0.957885	1.00903	1.0107	0.992537	0.961825	0.2459
156553657	PREDICTED: 14-3-3 protein epsilon isoform X2 [Nasonia vitripennis]	29.1516	4.80518	48.44	2	10	1.0086	1.00564	1.00197	1.0054	0.977244	1.01029	0.988383	0.991974	0.986642	0.246284
645001928	PREDICTED: amidophosphoribosyltransferase [Nasonia vitripennis]	59.366	7.1665	17.98	1	10	1.00753	0.995754	1.04517	1.01615	1.00702	0.997132	0.963151	0.989102	0.973378	0.246907
345494949	PREDICTED: leucine-rich repeat-containing protein 59 [Nasonia vitripennis]	37.8571	8.96826	15.32	1	5	0.924287	1.04437	0.971245	0.979967	1.00453	1.03713	1.05051	1.03072	1.05179	0.247441
156544592	PREDICTED: alpha-L-fucosidase-like [Nasonia vitripennis]	53.1503	6.53662	3.97	1	1	0.887027	1.03525	0.986701	0.969661	1.00919	1.02185	1.0699	1.03365	1.06599	0.248258
644998852	PREDICTED: peptidyl-prolyl cis-trans isomerase [Nasonia vitripennis]	17.6958	8.5874	73.33	2	8	1.02813	1.01241	1.00871	1.01641	1.02894	0.965075	0.96685	0.986955	0.971017	0.248436
345496724	PREDICTED: AFG3-like protein 2 isoform X1 [Nasonia vitripennis]	88.2126	8.63135	29.65	2	24	0.976479	0.992807	1.01438	0.994555	1.00497	1.00446	1.03147	1.01363	1.01918	0.248606
345494335	PREDICTED: zinc finger protein 2-like [Nasonia vitripennis]	51.2973	7.48877	4.01	1	1	1.13012	1.03219	0.969832	1.04405	0.969251	1.01835	0.92861	0.972069	0.931057	0.248802
268370199	actin related protein 2/3 complex, subunit 2, 34kDa [Nasonia vitripennis]	35.7117	8.6167	17.21	1	6	0.944286	1.01086	0.911296	0.955481	1.03595	0.965522	1.0096	1.00369	1.05046	0.248999
645040011	PREDICTED: N(G),N(G)-dimethylarginine dimethylaminohydrolase 1 isoform X2 [Nasonia vitripennis]	29.5897	6.41748	10.45	2	2	1.13561	1.0357	0.957207	1.04284	0.969637	0.987365	0.961229	0.972744	0.932786	0.250435
156553644	PREDICTED: heat shock protein 75 kDa, mitochondrial [Nasonia vitripennis]	80.1926	7.21045	24.36	1	14	0.907092	1.07741	0.838975	0.94116	0.997274	1.10536	1.03349	1.04538	1.11073	0.250906
645041943	PREDICTED: glycogen [starch] synthase-like, partial [Nasonia vitripennis]	17.7461	9.12939	34.84	1	5	1.00544	1.03378	1.01624	1.01849	0.969085	1.01902	1.00004	0.99605	0.97797	0.251001
345479785	PREDICTED: vacuolar protein sorting-associated protein 29 [Nasonia vitripennis]	20.5356	6.60986	19.78	1	3	0.833002	1.08491	0.987279	0.968399	1.05582	1.07594	1.06828	1.06668	1.10149	0.252503
645024831	PREDICTED: dihydrolipoyl dehydrogenase, mitochondrial isoform X3 [Nasonia vitripennis]	51.705	7.66455	45.82	3	19	1.02072	0.981563	1.0681	1.02346	0.990669	0.974846	1.00042	0.988643	0.96598	0.253148
239735554	gram-negative bacteria binding protein 1-2 precursor [Nasonia vitripennis]	54.3904	7.06396	16.49	1	7	0.951627	0.870711	1.03236	0.951566	1.01411	1.07445	0.981939	1.0235	1.0756	0.253431
645020309	PREDICTED: 26S proteasome non-ATPase regulatory subunit 7 [Nasonia vitripennis]	36.0479	6.48096	23.34	1	5	0.945146	0.970422	1.02965	0.981738	0.993493	1.02624	1.03933	1.01969	1.03866	0.253954
645005637	PREDICTED: cubilin [Nasonia vitripennis]	416.847	6.02393	2.29	1	7	1.05199	0.969511	1.00639	1.0093	1.0113	0.877546	0.957451	0.948764	0.940023	0.254966
156554040	PREDICTED: SAP domain-containing ribonucleoprotein [Nasonia vitripennis]	28.7343	6.23975	14.12	1	4	0.878014	1.05531	0.890617	0.941315	1.14252	0.964552	1.02496	1.04401	1.1091	0.255293
156550354	PREDICTED: ubiquitin carboxyl-terminal hydrolase isozyme L5 [Nasonia vitripennis]	35.5484	6.26514	31.51	1	8	0.966123	0.983602	1.00487	0.984865	0.984156	1.00877	1.03753	1.01015	1.02568	0.255302
300116732	T-complex protein 1 subunit gamma [Nasonia vitripennis]	60.4125	6.84424	52.55	1	27	0.911019	1.03797	0.945797	0.96493	1.01897	1.03318	0.998574	1.01691	1.05387	0.255354
645003293	PREDICTED: prolyl endopeptidase [Nasonia vitripennis]	88.1039	7.29834	21.46	1	12	0.960975	1.03757	0.957705	0.985417	1.02003	1.04283	1.00565	1.02284	1.03797	0.255923
644995591	PREDICTED: interferon-related developmental regulator 1 [Nasonia vitripennis]	53.5752	7.59131	7.17	1	3	0.920009	0.979102	0.992223	0.963778	0.981754	1.01221	0.992384	0.99545	1.03286	0.25634
645030989	PREDICTED: protein angel isoform X3 [Nasonia vitripennis]	54.9388	6.20166	10.06	3	4	1.14178	0.977256	0.956681	1.02524	0.941657	0.970172	0.92573	0.945853	0.922568	0.256352
156553665	PREDICTED: eukaryotic translation initiation factor 3 subunit L [Nasonia vitripennis]	63.84	6.40479	17.9	1	9	0.921272	1.03102	0.979844	0.97738	1.01093	1.03075	1.01828	1.01999	1.04359	0.25671
644997757	PREDICTED: calcium channel flower [Nasonia vitripennis]	24.1081	8.07471	10.19	1	2	0.920496	1.02268	0.992051	0.978408	0.987152	1.06288	1.03373	1.02792	1.0506	0.256739
345498258	PREDICTED: neuroglian [Nasonia vitripennis]	138.978	5.64307	17.79	1	17	1.03396	0.973288	1.0233	1.01018	0.975985	1.00435	0.959983	0.980107	0.970226	0.256882
645035205	PREDICTED: fragile X mental retardation syndrome-related protein 1 isoform X6 [Nasonia vitripennis]	64.8474	6.85889	22.2	6	9	0.980658	1.00972	0.921117	0.9705	1.00752	1.06505	0.981141	1.0179	1.04884	0.257948
288856265	NADH dehydrogenase [ubiquinone] flavoprotein 1, mitochondrial [Nasonia vitripennis]	51.7882	8.14795	53.81	2	17	1.00523	0.999854	1.04355	1.01621	1.00102	1.00523	0.979658	0.995303	0.979424	0.258114
645013173	PREDICTED: chaoptin isoform X3 [Nasonia vitripennis]	148.395	6.66846	3.41	3	3	1.13413	0.947062	1.07909	1.05343	1.00679	0.977165	0.946419	0.976791	0.92725	0.258128
645026803	PREDICTED: microtubule-actin cross-linking factor 1 isoform X6 [Nasonia vitripennis]	626.87	6.60986	39.32	1	1	0.970911	1.00406	0.992194	0.989055	0.985793	1.01442	1.05606	1.01875	1.03003	0.258845
288856254	NADH dehydrogenase [ubiquinone] iron-sulfur protein 4, mitochondrial [Nasonia vitripennis]	21.931	8.89502	62.37	1	9	0.985363	1.03394	1.07515	1.03149	0.993097	0.951976	1.02045	0.988507	0.958332	0.259033
645016795	PREDICTED: CTL-like protein 2 [Nasonia vitripennis]	74.9341	8.04541	4.68	1	2	1.09223	1.08075	0.941145	1.03804	0.943662	0.937328	1.01689	0.965959	0.930558	0.259177
156544931	PREDICTED: lissencephaly-1 homolog [Nasonia vitripennis]	46.1552	7.7085	12.93	1	4	0.956655	0.962181	1.00265	0.97383	0.986108	1.06802	0.987977	1.01404	1.04129	0.259772
645040715	PREDICTED: uncharacterized protein LOC103317046 [Nasonia vitripennis]	44.5558	5.2876	8.86	1	3	1.07459	1.02605	0.992506	1.03105	1.01917	0.974672	0.992623	0.99549	0.965512	0.259804
645017656	PREDICTED: eukaryotic translation initiation factor 5 [Nasonia vitripennis]	50.5655	5.24951	13.78	1	7	0.95423	1.03431	0.926353	0.971631	1.0053	0.996167	1.07026	1.02391	1.0538	0.26017
156541004	PREDICTED: UDP-N-acetylhexosamine pyrophosphorylase [Nasonia vitripennis]	53.0723	6.60986	12.84	1	5	0.908	1.01009	0.96975	0.962612	0.967003	1.01932	1.05644	1.01426	1.05365	0.260374
645018543	PREDICTED: major facilitator superfamily domain-containing protein 6 [Nasonia vitripennis]	87.2623	6.56592	3.4	1	2	0.963394	0.815199	1.04823	0.942274	0.95353	1.13458	1.07854	1.05555	1.12021	0.260994
645007801	PREDICTED: LOW QUALITY PROTEIN: helicase SKI2W [Nasonia vitripennis]	143.247	6.55127	5.29	1	4	1.10134	0.990602	1.01356	1.03517	0.999743	0.980138	0.991444	0.990442	0.956794	0.261248
345485558	PREDICTED: farnesyl pyrophosphate synthase [Nasonia vitripennis]	46.3995	8.04541	20.05	1	7	1.00088	1.05036	1.05361	1.03495	0.976726	0.916506	1.04816	0.980465	0.947354	0.261412
645033983	PREDICTED: signal transducer and activator of transcription 5B [Nasonia vitripennis]	92.8371	6.55127	3.39	1	2	1.05925	0.958601	1.08796	1.03527	1.00385	0.943866	0.989003	0.978906	0.945558	0.261697
644993107	PREDICTED: uncharacterized protein LOC100123970 [Nasonia vitripennis]	24.6012	4.86865	27.44	1	3	1.15272	0.913036	1.06501	1.04359	0.98201	0.878876	0.967948	0.942945	0.903561	0.2618
645042386	PREDICTED: nucleobindin-2 [Nasonia vitripennis]	67.8343	5.5542	8.51	1	4	0.961554	1.03283	0.96077	0.985051	0.995965	1.04351	1.02361	1.02103	1.03653	0.262077
645039221	PREDICTED: LOW QUALITY PROTEIN: nucleoside diphosphate-linked moiety X motif 19, mitochondrial-like [Nasonia vitripennis]	37.0386	6.87354	14.29	1	3	1.06955	0.911787	0.945037	0.975459	1.01986	1.01818	1.11099	1.04968	1.07609	0.262589
288856349	NADH dehydrogenase [ubiquinone] 1 alpha subcomplex subunit 8 [Nasonia vitripennis]	20.0308	5.65576	64.37	1	10	0.953214	1.05308	1.07636	1.02755	0.973106	0.972822	0.987899	0.977942	0.951722	0.262785
345486923	PREDICTED: trichohyalin-like [Nasonia vitripennis]	80.0243	9.36377	15.32	1	11	1.04876	0.978757	1.03598	1.02117	0.970984	1.00683	0.992561	0.990126	0.969603	0.264069
645020043	PREDICTED: V-type proton ATPase catalytic subunit A [Nasonia vitripennis]	67.8895	5.37646	67.37	1	32	1.05944	0.981678	1.02186	1.02099	1.00147	0.987512	0.98428	0.991086	0.970709	0.264495
239735560	calreticulin precursor [Nasonia vitripennis]	47.2156	4.62744	52.85	1	16	0.878884	1.01332	0.958691	0.950298	0.938491	1.0936	1.05541	1.02917	1.08299	0.264551
156542191	PREDICTED: elongation factor 1-alpha [Nasonia vitripennis]	50.5535	9.08545	38.61	1	3	1.24161	0.900729	1.12696	1.08977	0.967679	0.872674	1.0091	0.949817	0.871579	0.264682
288856347	NADH dehydrogenase [ubiquinone] 1 alpha subcomplex subunit 5 [Nasonia vitripennis]	13.8834	8.6167	60.17	1	9	0.977436	1.03898	1.05306	1.02316	0.977751	0.962654	1.01832	0.986242	0.963918	0.265688
156541730	PREDICTED: 40S ribosomal protein S6 [Nasonia vitripennis]	28.81	10.9312	40.24	1	11	0.855362	1.05563	0.947745	0.952913	0.996639	1.02472	1.08133	1.03423	1.08533	0.266361
238859582	lipase A-like precursor [Nasonia vitripennis]	53.1543	5.24951	28.01	1	11	0.786322	0.854624	1.14039	0.927111	1.02491	1.07613	1.111	1.07068	1.15486	0.266567
218749822	chaperonin containing TCP1, subunit 7 [Nasonia vitripennis]	59.2287	6.48096	56.01	1	22	0.935351	1.03121	0.970787	0.979117	1.00112	1.03545	1.0157	1.01742	1.03912	0.266645
345480487	PREDICTED: LOW QUALITY PROTEIN: E3 ubiquitin-protein ligase listerin [Nasonia vitripennis]	193.754	6.59521	1.18	1	2	1.02716	0.988415	0.92367	0.979749	1.03682	0.993606	1.03882	1.02308	1.04423	0.266664
156550520	PREDICTED: coiled-coil domain-containing protein 58 [Nasonia vitripennis]	16.9106	8.41162	30.34	1	4	0.894249	1.03999	0.918814	0.951019	0.986259	1.05861	1.00206	1.01564	1.06795	0.266753
644998801	PREDICTED: ATP-binding cassette sub-family F member 2 [Nasonia vitripennis]	72.1516	7.13721	13.66	1	8	0.979818	0.977869	0.95372	0.970469	0.986349	1.08595	0.977476	1.01659	1.04753	0.266787
645031970	PREDICTED: sideroflexin-1 [Nasonia vitripennis]	35.3573	8.99756	42.11	1	10	0.874321	0.951058	1.03721	0.954196	1.03775	1.07494	0.968231	1.02697	1.07627	0.267121
645002382	PREDICTED: ATP-dependent zinc metalloprotease YME1L1 [Nasonia vitripennis]	82.1461	8.99756	13.72	1	7	1.13361	0.970951	0.998805	1.03445	0.997325	0.95286	0.950312	0.966832	0.93463	0.267133
156553510	PREDICTED: prothymosin alpha-A [Nasonia vitripennis]	15.6835	4.55127	39.04	1	5	0.870383	1.072	0.920391	0.954258	1.04576	1.03741	1.01615	1.03311	1.08263	0.267429
238908542	lipase-like venom protein precursor [Nasonia vitripennis]	43.7178	7.03467	31.19	1	10	0.866058	0.832844	1.12095	0.939952	1.12711	1.043	1.02228	1.06413	1.13211	0.267533
345479731	PREDICTED: peroxisomal acyl-coenzyme A oxidase 3 isoform X2 [Nasonia vitripennis]	81.0803	7.98682	2.22	2	1	0.907183	1.0261	0.994845	0.976043	0.995491	1.03132	1.0533	1.0267	1.0519	0.267674
345494144	PREDICTED: alpha-tocopherol transfer protein-like [Nasonia vitripennis]	36.9187	6.20166	17.3	1	5	1.0146	0.997304	1.11919	1.0437	0.905276	0.949852	1.05273	0.969286	0.928704	0.268322
156549146	PREDICTED: poly(ADP-ribose) glycohydrolase ARH3-like [Nasonia vitripennis]	39.5813	5.61768	19.05	1	6	0.929131	0.98356	1.01824	0.976976	1.01593	0.98417	1.06838	1.02283	1.04693	0.268479
644997943	PREDICTED: LOW QUALITY PROTEIN: valine--tRNA ligase, mitochondrial-like [Nasonia vitripennis]	112.234	8.06006	2.06	1	1	1.01353	0.908737	0.98146	0.967908	0.948551	1.0785	1.08571	1.03759	1.07199	0.268627
345494243	PREDICTED: histone H2A.V [Nasonia vitripennis]	13.4115	10.5796	20.31	2	1	0.908067	1.0713	1.20465	1.06134	0.886423	1.01307	0.924269	0.941253	0.886854	0.268859
156553508	PREDICTED: lysosomal aspartic protease-like [Nasonia vitripennis]	44.4441	7.03467	12.08	1	3	0.904786	0.980341	1.00914	0.964756	0.99372	1.05463	0.990149	1.01283	1.04983	0.269059
645035049	PREDICTED: ras-like protein 2 isoform X1 [Nasonia vitripennis]	23.2467	7.35693	44.55	2	8	1.13968	0.971183	0.988155	1.03301	0.995045	0.945748	0.941978	0.960924	0.930221	0.269082
645024578	PREDICTED: nucleoprotein TPR [Nasonia vitripennis]	207.037	5.49072	9.75	2	15	0.937746	1.02623	1.0088	0.990927	1.03261	1.03325	1.01382	1.02656	1.03596	0.269197
156538793	PREDICTED: proteasome assembly chaperone 2 [Nasonia vitripennis]	28.691	5.35107	11.11	1	2	0.902264	1.05774	0.948345	0.969448	1.01517	1.01187	1.07503	1.03402	1.06661	0.269893
345496349	PREDICTED: uncharacterized protein LOC100678590 [Nasonia vitripennis]	50.3937	7.41553	5.26	1	3	0.988189	1.12717	0.974787	1.03005	0.92287	0.954182	1.00488	0.960643	0.932617	0.269998
156554675	PREDICTED: SPARC [Nasonia vitripennis]	34.3161	5.07178	16.5	1	3	0.994836	1.02803	1.02011	1.01433	0.988015	1.01195	0.996101	0.99869	0.984584	0.270287
644994027	PREDICTED: uncharacterized protein LOC100119225 [Nasonia vitripennis]	13.6089	5.51611	19.84	1	2	1.07478	0.826037	0.944056	0.948293	1.01722	1.06606	1.04209	1.04179	1.09859	0.270656
645031888	PREDICTED: general odorant-binding protein 56d [Nasonia vitripennis]	15.5096	5.40186	12.32	1	1	1.03266	0.988298	1.0562	1.02572	1.01785	1.00092	0.942796	0.987187	0.962434	0.271221
288856289	NADH dehydrogenase [ubiquinone] 1 alpha subcomplex subunit 7 [Nasonia vitripennis]	11.3481	10.3306	44.12	2	4	1.06011	0.986648	1.02993	1.02556	1.0304	0.916124	0.9797	0.975409	0.951098	0.271357
345494735	PREDICTED: ras-related protein Rab6 isoform X2 [Nasonia vitripennis]	23.5498	5.35107	27.27	2	4	1.02069	1.00739	1.02736	1.01848	0.99465	0.968035	1.02548	0.996055	0.977984	0.271735
345491575	PREDICTED: uncharacterized protein LOC100678525 [Nasonia vitripennis]	254.026	6.04932	7.99	1	14	0.875813	1.0444	1.00044	0.973552	1.02654	1.07804	1.02099	1.04186	1.07016	0.271984
644998734	PREDICTED: 15-hydroxyprostaglandin dehydrogenase [NAD(+)]-like isoform X3 [Nasonia vitripennis]	30.5249	7.25439	41.67	15	7	1.02816	1.07923	0.99507	1.03415	1.03785	0.965425	0.969733	0.991002	0.958274	0.272042
345480849	PREDICTED: AP-1 complex subunit beta-1 isoform X2 [Nasonia vitripennis]	101.864	5.14795	41.37	2	26	1.08559	1.02077	1.00021	1.03552	0.980012	1.0118	1.00914	1.00032	0.966004	0.272186
156542548	PREDICTED: endoplasmin [Nasonia vitripennis]	90.5931	4.94482	33.67	2	29	0.92606	1.06039	0.877165	0.954538	1.01784	1.05592	1.00644	1.02674	1.07564	0.272445
644999656	PREDICTED: non-specific lipid-transfer protein-like [Nasonia vitripennis]	59.5924	8.70459	39.34	1	17	1.03701	1.01089	0.985262	1.01105	0.997527	0.972689	0.997734	0.989317	0.9785	0.272494
645024398	PREDICTED: insulin-like growth factor 2 mRNA-binding protein 1 isoform X2 [Nasonia vitripennis]	61.7603	9.18799	29.32	4	13	0.970717	1.01778	0.937911	0.975468	1.09171	1.01217	0.977876	1.02725	1.05309	0.274323
345490895	PREDICTED: spermine oxidase-like [Nasonia vitripennis]	58.64	6.06201	13.08	5	4	0.85875	0.951842	1.03424	0.948277	0.979143	1.31741	1.00385	1.10013	1.16014	0.274709
645013382	PREDICTED: CDP-diacylglycerol--inositol 3-phosphatidyltransferase, partial [Nasonia vitripennis]	24.8355	7.45947	5.07	1	1	1.02327	0.989153	1.05678	1.02307	0.949707	1.03602	0.953601	0.979776	0.957682	0.274897
644993441	PREDICTED: LOW QUALITY PROTEIN: tropomodulin [Nasonia vitripennis]	42.4338	5.38916	26.34	1	8	1.02753	0.982736	1.05684	1.02237	0.994434	0.969074	1.01016	0.991222	0.969535	0.274987
645002823	PREDICTED: transcription factor A, mitochondrial [Nasonia vitripennis]	29.2014	9.5835	17.74	1	5	0.90746	1.0454	0.956332	0.96973	1.00277	1.01524	1.05579	1.0246	1.05658	0.275114
645039078	PREDICTED: polyadenylate-binding protein-interacting protein 2B isoform X2 [Nasonia vitripennis]	16.5514	4.1958	17.57	2	2	0.776673	1.11759	0.901539	0.931936	1.06372	1.09074	1.02541	1.05996	1.13737	0.275228
156548398	PREDICTED: DDRGK domain-containing protein 1 [Nasonia vitripennis]	32.6439	5.70654	8.68	1	2	0.837114	0.890832	1.06029	0.92941	0.929598	1.07306	1.12026	1.04097	1.12004	0.275374
645034879	PREDICTED: signal recognition particle receptor subunit beta, partial [Nasonia vitripennis]	26.2587	8.45557	26.61	1	5	1.01652	1.00715	0.969029	0.997565	0.999715	1.02009	1.05602	1.02527	1.02778	0.275376
156537767	PREDICTED: ras-related protein Rac1, partial [Nasonia vitripennis]	13.6444	8.83643	30	1	3	1.05317	0.993943	1.02142	1.02284	0.992522	0.973014	1.02009	0.995207	0.972981	0.275401
345486543	PREDICTED: pyruvate dehydrogenase E1 component subunit beta, mitochondrial [Nasonia vitripennis]	38.2046	6.55127	53.26	1	14	1.01098	0.986937	1.07758	1.02517	0.987353	0.948974	1.01426	0.98353	0.959386	0.276534
645020882	PREDICTED: retinol dehydrogenase 14 [Nasonia vitripennis]	36.9266	8.85107	22.32	1	6	1.04754	0.999692	1.00129	1.01617	1.00519	0.988674	0.992679	0.995513	0.97967	0.277746
156554042	PREDICTED: delta-like protein 1 [Nasonia vitripennis]	47.2816	5.08447	2.28	1	1	0.939379	1.01977	0.895386	0.951511	0.913153	1.10975	1.11829	1.04706	1.10042	0.278442
345491690	PREDICTED: proline synthase co-transcribed bacterial homolog protein [Nasonia vitripennis]	27.7203	7.09326	8.43	1	2	0.992319	0.993033	0.938525	0.974625	1.1183	0.987294	0.992498	1.0327	1.05958	0.279608
345480136	PREDICTED: 15-hydroxyprostaglandin dehydrogenase [NAD(+)]-like [Nasonia vitripennis]	28.4909	7.13721	22.35	1	4	1.10654	1.08904	0.955658	1.05041	1.01411	0.917309	1.00659	0.979337	0.932337	0.27967
239787860	multiple inositol polyphosphate phosphatase-like venom protein precursor [Nasonia vitripennis]	51.0585	8.22119	3.16	1	1	0.843486	0.979682	1.04407	0.955747	0.975927	1.08757	1.05796	1.04049	1.08867	0.280122
289177162	cytochrome P450 6AQ5 [Nasonia vitripennis]	58.6013	7.66455	28.29	1	8	1.15205	1.17598	0.871053	1.06636	0.857699	0.959277	0.987662	0.93488	0.876702	0.280858
645005369	PREDICTED: asparagine--tRNA ligase, cytoplasmic [Nasonia vitripennis]	63.8671	5.92236	30.63	1	13	0.902871	1.03881	0.945178	0.962288	0.981267	1.04926	1.02352	1.01802	1.05791	0.28134
156555608	PREDICTED: 60S ribosomal protein L30 isoform X1 [Nasonia vitripennis]	12.5416	9.86182	52.63	2	7	0.958544	0.995428	1.02586	0.993276	0.99654	1.02465	1.05429	1.02516	1.0321	0.281347
645012394	PREDICTED: zinc finger CCCH domain-containing protein 11A-like isoform X2 [Nasonia vitripennis]	53.098	5.43994	4.87	2	2	0.826173	1.09296	0.9247	0.947943	1.08672	1.0431	1.01491	1.04824	1.10581	0.281486
645035104	PREDICTED: biotin--protein ligase [Nasonia vitripennis]	110.315	7.28369	5.93	1	5	1.06126	1.01047	0.952627	1.00812	0.990567	0.91805	0.973156	0.960591	0.952855	0.28183
156544718	PREDICTED: thioredoxin-related transmembrane protein 1 [Nasonia vitripennis]	31.7913	6.62451	12.77	1	3	1.13056	0.974702	0.953261	1.01951	0.920857	0.953869	0.969087	0.947938	0.929801	0.282297
645024541	PREDICTED: synapsin [Nasonia vitripennis]	52.7005	7.54736	29.38	1	11	1.14433	0.97939	0.996828	1.04018	0.985468	0.936419	0.993068	0.971652	0.934115	0.282594
644999375	PREDICTED: mitochondrial import inner membrane translocase subunit Tim10 [Nasonia vitripennis]	10.3002	6.52197	25.27	1	2	1.07325	1.04568	1.03592	1.05162	0.990921	0.946214	1.07327	1.00347	0.954216	0.28302
345497821	PREDICTED: uncharacterized protein LOC100679149 [Nasonia vitripennis]	30.3973	7.21045	14.72	1	2	1.23673	0.910902	1.08366	1.0771	0.993089	0.862457	0.991062	0.948869	0.88095	0.283352
156552888	PREDICTED: protein PBDC1 [Nasonia vitripennis]	19.7169	5.22412	23.08	1	3	1.13538	0.946883	1.03467	1.03898	0.952675	0.919321	1.01679	0.962929	0.926803	0.283957
156536860	PREDICTED: uncharacterized protein LOC100113619 [Nasonia vitripennis]	16.9815	5.23682	65.82	1	8	1.06007	1.09518	0.940893	1.03205	0.963901	0.988278	0.968868	0.973682	0.943446	0.284592
156542568	PREDICTED: V-type proton ATPase subunit D [Nasonia vitripennis]	27.728	9.51025	50.81	1	11	1.00984	1.0419	0.999187	1.01698	1.00397	0.964543	1.01104	0.993186	0.976606	0.286044
645027206	PREDICTED: proteasome subunit alpha type-3-like [Nasonia vitripennis]	20.301	5.43994	5.59	1	1	0.901693	0.984006	1.03074	0.972147	1.02455	1.06634	0.987632	1.02617	1.05558	0.287206
345480682	PREDICTED: uncharacterized protein PFB0145c-like [Nasonia vitripennis]	20.9358	5.26221	86.39	1	15	0.920538	1.03827	0.953644	0.970816	1.03526	0.988431	1.02849	1.01739	1.04798	0.287291
156543260	PREDICTED: uncharacterized protein LOC100123130 [Nasonia vitripennis]	10.5755	5.0083	35.42	1	2	1.08194	1.07018	0.993391	1.0485	1.08851	0.905427	0.904544	0.96616	0.921466	0.287535
345486030	PREDICTED: uncharacterized protein LOC100118386 [Nasonia vitripennis]	40.2929	9.77393	3.27	1	1	1.2636	0.968643	0.954505	1.06225	0.928666	0.959539	0.925999	0.938068	0.883096	0.287609
345496507	PREDICTED: uncharacterized protein LOC100679632 [Nasonia vitripennis]	44.2584	4.62744	8.93	1	3	1.22643	0.953987	1.00561	1.06201	1.00837	0.934941	0.919953	0.954422	0.898694	0.288138
645014714	PREDICTED: translation initiation factor IF-3, chloroplastic [Nasonia vitripennis]	20.8023	9.61279	8.94	1	2	0.883814	1.07964	0.90665	0.956702	1.05132	0.990389	1.07258	1.0381	1.08508	0.288414
645026510	PREDICTED: uncharacterized protein YER152C-like isoform X1 [Nasonia vitripennis]	53.4752	8.27979	3.82	2	2	1.44183	0.924956	0.98664	1.11781	0.953568	0.895865	0.902747	0.917394	0.820707	0.288777
645006725	PREDICTED: ATP-dependent RNA helicase WM6-like [Nasonia vitripennis]	48.578	5.75732	42.35	1	3	0.984085	1.04103	1.06423	1.02978	0.997127	0.912218	1.02684	0.978727	0.950422	0.288889
345492893	PREDICTED: pseudouridine-5'-monophosphatase-like isoform X1 [Nasonia vitripennis]	25.8842	6.44287	46.52	1	3	1.01971	0.996059	1.08593	1.0339	0.961211	1.04085	0.961318	0.987791	0.955404	0.289289
645012254	PREDICTED: pancreatic triacylglycerol lipase-like [Nasonia vitripennis]	52.9588	6.59521	4.89	1	1	0.925969	1.13661	1.07256	1.04505	0.953348	0.950174	0.996857	0.966793	0.925118	0.289435
645003342	PREDICTED: putative glutamate synthase [NADPH] isoform X2 [Nasonia vitripennis]	229.005	6.99072	33.32	1	1	0.802742	1.0015	1.03873	0.947659	1.037	1.11522	0.989949	1.04739	1.10524	0.290026
645027837	PREDICTED: protein still life, isoform SIF type 1 isoform X5 [Nasonia vitripennis]	232.291	8.33838	3.73	5	6	1.22357	0.903355	1.0853	1.07074	0.969704	0.931542	0.969001	0.956749	0.893538	0.290094
156541626	PREDICTED: probable small nuclear ribonucleoprotein G [Nasonia vitripennis]	8.53547	8.80713	32.89	1	2	0.850374	1.09456	0.910173	0.951704	1.05988	0.991273	1.09409	1.04842	1.10162	0.29046
645037523	PREDICTED: LOW QUALITY PROTEIN: hemocytin-like [Nasonia vitripennis]	438.174	5.35107	4.01	1	15	0.973045	0.954382	1.01258	0.980002	0.96991	1.02472	1.0584	1.01768	1.03844	0.290701
645038885	PREDICTED: histidine decarboxylase isoform X2 [Nasonia vitripennis]	80.739	5.85889	1.93	2	1	1.18178	0.953503	1.0425	1.05926	1.04437	0.91089	0.938433	0.964564	0.910599	0.290951
645005211	PREDICTED: protein croquemort-like isoform X2 [Nasonia vitripennis]	56.0127	7.91357	8.27	2	3	1.15323	1.16689	0.897678	1.0726	0.864537	0.927726	1.04994	0.947401	0.883276	0.291342
156543362	PREDICTED: probable phospholipid hydroperoxide glutathione peroxidase [Nasonia vitripennis]	23.4248	6.354	42.03	1	7	0.841345	1.07931	0.948713	0.956456	0.979058	1.13679	1.05399	1.05661	1.10471	0.291604
156555105	PREDICTED: tRNA dimethylallyltransferase, mitochondrial isoform X1 [Nasonia vitripennis]	56.6543	6.72705	3.04	1	1	1.19887	0.935879	1.03883	1.05786	0.957357	0.99189	0.940448	0.963232	0.910549	0.291784
345490296	PREDICTED: cytoplasmic dynein 1 intermediate chain isoform X13 [Nasonia vitripennis]	73.1713	5.66846	3.06	13	2	0.910089	1.07247	0.898839	0.960467	1.10559	1.02945	0.986571	1.04054	1.08337	0.291904
645037478	PREDICTED: uncharacterized protein LOC103318011 [Nasonia vitripennis]	67.8626	9.26123	7.52	1	2	0.752745	1.17094	0.755807	0.893164	0.951547	1.15381	1.12999	1.07845	1.20745	0.292143
156548556	PREDICTED: eukaryotic translation initiation factor 3 subunit A [Nasonia vitripennis]	128.237	8.83643	25.3	1	27	0.978724	1.02631	0.978121	0.994385	1.01573	1.02673	1.00361	1.01536	1.02109	0.292143
345480795	PREDICTED: pleckstrin homology domain-containing family F member 2 [Nasonia vitripennis]	29.4488	8.79248	11.32	1	3	0.9999	0.998032	1.01179	1.00324	1.06427	1.03825	0.988972	1.0305	1.02717	0.29231
645011700	PREDICTED: uncharacterized transmembrane protein DDB_G0289901-like [Nasonia vitripennis]	77.4733	3.90381	3.49	1	2	1.58311	0.749973	1.16129	1.16479	0.899946	0.934386	0.767196	0.867176	0.744491	0.292709
156538066	PREDICTED: alcohol dehydrogenase [NADP(+)]-like [Nasonia vitripennis]	40.284	9.05615	12.64	1	2	0.912363	1.008	1.00177	0.974045	0.96853	1.0596	1.04644	1.02486	1.05217	0.292721
645006504	PREDICTED: uncharacterized protein LOC100117367 isoform X2 [Nasonia vitripennis]	41.8452	9.53955	7.07	2	2	1.13395	1.03808	1.00704	1.05969	1.11057	0.890068	0.861103	0.953915	0.900184	0.293512
645026457	PREDICTED: protein NDRG3 isoform X1 [Nasonia vitripennis]	52.8023	5.5415	3.16	2	1	1.26687	0.971403	0.980599	1.07296	0.919614	1.01157	0.919196	0.950126	0.88552	0.293829
156545271	PREDICTED: aminoacyl tRNA synthase complex-interacting multifunctional protein 2 isoform X2 [Nasonia vitripennis]	34.436	5.77002	35.39	5	9	0.947307	1.02814	0.935399	0.970282	1.00725	1.03773	0.984998	1.00999	1.04093	0.293888
645024475	PREDICTED: suppressor of G2 allele of SKP1 homolog isoform X2 [Nasonia vitripennis]	24.1011	5.69385	10.75	2	1	0.975083	1.01035	0.959838	0.981757	1.07565	0.963955	1.03583	1.02514	1.04419	0.293891
355389953	putative odorant binding protein 40 [Nasonia vitripennis]	29.5347	5.07178	61.92	2	13	0.80571	1.01679	1.0297	0.950731	1.0706	1.01517	1.03545	1.04041	1.09433	0.294444
644992060	PREDICTED: 39S ribosomal protein L1, mitochondrial [Nasonia vitripennis]	44.9317	8.54346	3.02	1	1	0.969915	1.05495	1.05392	1.02626	0.999858	0.952019	1.00734	0.986405	0.961163	0.294631
645011837	PREDICTED: phosphatidylinositol-binding clathrin assembly protein LAP [Nasonia vitripennis]	71.0335	9.08545	14.6	1	7	1.00951	1.04154	1.04102	1.03069	0.978396	0.995114	1.04095	1.00482	0.974901	0.295048
645017713	PREDICTED: serrate RNA effector molecule homolog isoform X7 [Nasonia vitripennis]	85.8771	5.46533	5.63	7	4	0.904215	0.993849	1.00507	0.967711	1.01349	1.01077	0.995783	1.00668	1.04027	0.295167
645035970	PREDICTED: protein aubergine-like isoform X2 [Nasonia vitripennis]	100.187	9.01221	33.67	2	23	0.891016	1.0069	0.980387	0.959433	1.03145	1.06545	0.95454	1.01715	1.06015	0.295624
645029413	PREDICTED: uncharacterized protein LOC100120708, partial [Nasonia vitripennis]	74.4706	6.43018	7.28	1	3	1.23692	0.901391	0.977079	1.03846	0.998235	0.842106	0.869775	0.903372	0.869913	0.295755
645023834	PREDICTED: regucalcin-like [Nasonia vitripennis]	33.9704	5.59229	53.07	1	14	0.983296	1.01253	1.06606	1.02063	0.964853	0.964225	1.0217	0.983591	0.963713	0.29584
229606117	annexin B11 isoform A [Nasonia vitripennis]	35.7359	5.16064	42.01	2	10	1.01876	1.03389	1.00471	1.01912	1.01383	1.00842	1.00259	1.00828	0.989361	0.29603
156547363	PREDICTED: 6-phosphogluconolactonase [Nasonia vitripennis]	26.1554	5.12256	47.46	1	9	0.920628	1.03145	0.961342	0.971141	0.98673	1.01288	1.04553	1.01505	1.04521	0.296077
645037977	PREDICTED: ER lumen protein retaining receptor [Nasonia vitripennis]	24.3312	8.83643	3.77	2	1	0.820529	1.15006	0.824422	0.93167	1.07195	1.01806	1.10989	1.06663	1.14486	0.296108
645028888	PREDICTED: filamin-A [Nasonia vitripennis]	308.825	6.96143	0.63	1	1	1.15711	0.981224	1.01556	1.0513	1.01023	0.89534	1.01039	0.971986	0.924556	0.296233
645017433	PREDICTED: LOW QUALITY PROTEIN: serine/arginine-rich splicing factor 7-like, partial [Nasonia vitripennis]	12.588	8.19189	35.09	1	3	0.995674	1.03278	0.997857	1.00877	0.978937	1.01201	0.974754	0.988566	0.979972	0.296241
156542436	PREDICTED: beta-ureidopropionase-like [Nasonia vitripennis]	42.3355	6.62451	51.85	1	15	0.972832	1.05785	1.01387	1.01485	0.938908	1.00753	0.983899	0.976778	0.962487	0.296578
645009913	PREDICTED: probable salivary secreted peptide [Nasonia vitripennis]	12.9378	10.2134	13.45	1	2	1.07599	1.01391	1.15644	1.08211	0.927661	0.734014	1.13886	0.933513	0.862676	0.296821
645034168	PREDICTED: U1 small nuclear ribonucleoprotein A isoform X2 [Nasonia vitripennis]	25.9586	9.71533	18.7	2	4	0.95229	1.00529	0.987427	0.981669	1.0496	1.02437	0.971209	1.01506	1.03401	0.296846
644993583	PREDICTED: probable phospholipid-transporting ATPase IA isoform X11 [Nasonia vitripennis]	142.004	7.60596	3.82	11	3	1.18646	0.940656	1.07182	1.06631	1.07925	0.839993	0.920699	0.946647	0.887777	0.297128
269784705	mitochondrial-processing peptidase subunit beta [Nasonia vitripennis]	53.3917	6.22705	75.47	1	27	1.03068	0.976767	1.05417	1.02054	0.997403	0.988042	0.993282	0.992909	0.972928	0.297225
345495771	PREDICTED: AP-2 complex subunit sigma [Nasonia vitripennis]	16.9826	6.17627	30.99	1	4	1.08114	1.00459	0.997221	1.02765	0.984308	0.993682	1.00599	0.994661	0.967898	0.297323
156547820	PREDICTED: integrin beta-PS-like isoform X1 [Nasonia vitripennis]	94.0734	5.49072	2.49	2	1	0.982896	0.935597	1.03012	0.982873	1.06012	1.00319	1.00426	1.02252	1.04034	0.297557
262050600	antimicrobial peptide defensin 1-2 precursor [Nasonia vitripennis]	10.8483	6.02393	10.89	1	1	1.58439	1.23487	0.719289	1.17952	0.886848	0.761129	0.964013	0.870663	0.738152	0.29756
644999955	PREDICTED: LOW QUALITY PROTEIN: trehalase-like [Nasonia vitripennis]	74.5567	6.69775	16.02	1	9	0.908046	0.906507	1.06968	0.961411	0.998634	1.06239	1.02817	1.02973	1.07106	0.298186
645004330	PREDICTED: nuclear cap-binding protein subunit 1 [Nasonia vitripennis]	92.237	6.56592	11.25	1	6	1.10417	0.982387	1.00662	1.03106	0.971005	1.02181	0.944838	0.979218	0.949721	0.299624
645032876	PREDICTED: speckle-type POZ protein A-like [Nasonia vitripennis]	36.2858	5.40186	7.48	1	2	0.989819	1.01731	1.12623	1.04445	0.900414	1.06891	0.924554	0.964626	0.923571	0.299958
156545006	PREDICTED: leucine-rich repeat neuronal protein 1-like [Nasonia vitripennis]	52.511	5.56689	5.25	1	2	1.09919	1.06562	0.951913	1.03891	0.913988	1.00452	1.006	0.974833	0.938325	0.300741
156543010	PREDICTED: tyrosine aminotransferase isoform X1 [Nasonia vitripennis]	47.8544	5.40186	2.82	2	1	1.17261	1.11618	0.995777	1.09486	1.03772	0.702222	1.0804	0.940112	0.858662	0.301199
645037519	PREDICTED: short-chain dehydrogenase/reductase family 16C member 6-like [Nasonia vitripennis]	34.2769	8.646	11.71	1	3	1.0919	1.14175	0.923385	1.05234	0.981618	0.906545	1.00958	0.965913	0.917869	0.301265
156555799	PREDICTED: actin-3-like [Nasonia vitripennis]	41.7517	5.47803	60.64	7	4	1.16623	0.963633	1.01054	1.0468	0.985385	0.969155	0.967314	0.973951	0.930407	0.301772
645034137	PREDICTED: calmodulin isoform X2 [Nasonia vitripennis]	16.7998	4.22119	61.07	1	11	0.99241	1.00567	1.02859	1.00889	0.953728	1.0064	0.997563	0.985899	0.977212	0.301893
645008547	PREDICTED: ruvB-like 2 isoform X2 [Nasonia vitripennis]	51.4597	5.40186	24.46	2	9	0.980485	1.01658	1.0102	1.00242	1.02318	0.999156	1.0522	1.02485	1.02237	0.302073
645010535	PREDICTED: lamin-C-like isoform X2 [Nasonia vitripennis]	69.2232	6.65381	63.17	2	33	1.05022	1.02516	0.972641	1.01601	1.01306	0.982253	0.947106	0.980806	0.965355	0.302347
156546383	PREDICTED: 60S ribosomal protein L35a [Nasonia vitripennis]	16.3822	10.9604	18.06	1	3	0.863711	0.997753	1.03519	0.96555	1.00703	1.01802	1.06794	1.03099	1.06778	0.302361
645027740	PREDICTED: multiple PDZ domain protein isoform X3 [Nasonia vitripennis]	272.644	5.26221	4.22	3	8	1.2088	0.9129	1.03455	1.05208	0.991416	0.957966	0.880909	0.94343	0.896726	0.302523
645011340	PREDICTED: contactin [Nasonia vitripennis]	105.589	7.92822	11.83	1	7	1.14711	0.936087	1.04192	1.04171	0.992345	0.978697	0.926739	0.965927	0.927255	0.302688
156546246	PREDICTED: glutaredoxin-related protein 5, mitochondrial [Nasonia vitripennis]	15.9212	7.98682	7.04	1	1	0.984414	1.02294	0.911042	0.972799	1.11838	0.984971	1.00332	1.03555	1.06451	0.30277
645004933	PREDICTED: uncharacterized protein LOC100119252 isoform X2 [Nasonia vitripennis]	39.6378	6.80029	27.6	2	7	0.989465	0.979376	1.00232	0.990389	1.0191	0.984714	1.16784	1.05722	1.06748	0.30302
645000625	PREDICTED: microtubule-associated protein futsch [Nasonia vitripennis]	598.984	5.03369	15.94	1	70	1.02869	0.976628	1.02998	1.01177	1.01075	0.977561	0.971259	0.986522	0.975051	0.303929
645036185	PREDICTED: coiled-coil domain-containing protein 47 [Nasonia vitripennis]	53.9237	5.45264	7.45	1	3	1.03847	1.05014	1.03372	1.04077	0.967952	0.898997	1.07435	0.980435	0.942026	0.304231
156551396	PREDICTED: reticulocalbin-2 [Nasonia vitripennis]	38.0011	4.57666	19.64	1	4	1.08334	0.991683	1.02	1.03168	1.02825	0.917592	0.998266	0.98137	0.951239	0.304366
644991798	PREDICTED: uncharacterized protein LOC100115831 [Nasonia vitripennis]	48.9278	7.62061	33.72	1	11	1.03161	1.04519	0.978949	1.01858	1.01852	0.990034	0.935295	0.981282	0.963381	0.304469
156550697	PREDICTED: vitellogenin [Nasonia vitripennis]	202.529	7.92822	71.43	1	99	0.74205	1.04253	1.02603	0.93687	1.0463	1.09086	1.02456	1.05391	1.12492	0.304548
645031105	PREDICTED: ATPase inhibitor mai-2, mitochondrial-like isoform X2 [Nasonia vitripennis]	11.7168	9.40771	59.62	2	6	0.89558	1.03391	0.975115	0.968201	0.988456	1.04564	1.02347	1.01919	1.05266	0.305217
345479103	PREDICTED: glutaminase liver isoform, mitochondrial [Nasonia vitripennis]	74.0147	7.29834	13.03	1	7	1.07185	0.950969	1.0779	1.03357	0.98992	0.96563	0.995871	0.983807	0.95185	0.305228
156550797	PREDICTED: DNA replication licensing factor Mcm3 [Nasonia vitripennis]	91.6913	5.78271	11.4	1	8	0.890776	1.01871	1.00112	0.970201	1.07163	1.01436	0.98962	1.0252	1.05669	0.30532
644996604	PREDICTED: syntaxin-12 [Nasonia vitripennis]	30.4517	8.51416	33.09	1	6	1.20623	0.993771	0.99167	1.06389	1.01692	0.95227	0.962161	0.977118	0.918438	0.305784
226823349	structural maintenance of chromosomes 1A [Nasonia vitripennis]	141.062	6.7124	1.14	1	1	1.13622	0.969799	1.01723	1.04108	0.996784	1.00494	0.926646	0.976124	0.937604	0.305938
288856295	succinate dehydrogenase complex, subunit A, flavoprotein (Fp) [Nasonia vitripennis]	72.4261	6.771	45.23	1	23	1.0358	0.94807	1.08345	1.02244	0.998105	0.960516	0.962819	0.973813	0.952442	0.30606
645014660	PREDICTED: elongation factor Tu, mitochondrial-like [Nasonia vitripennis]	52.3407	8.80713	68.64	1	24	1.00763	1.08164	0.984427	1.02456	0.97033	0.999105	0.996297	0.988577	0.964877	0.3063
645035432	PREDICTED: signal recognition particle 54 kDa protein [Nasonia vitripennis]	47.8608	9.17334	22.1	1	7	0.961827	0.932301	1.02327	0.972466	1.02812	1.04588	0.968466	1.01416	1.04287	0.30638
644992779	PREDICTED: dynein heavy chain 3, axonemal [Nasonia vitripennis]	457.877	5.77002	0.5	1	1	0.398759	1.40994	0.544628	0.784443	1.22841	1.32805	0.968187	1.17488	1.49773	0.30645
156550941	PREDICTED: acyl-CoA dehydrogenase family member 9, mitochondrial [Nasonia vitripennis]	72.1519	6.66846	21.64	1	12	0.991828	1.01237	0.950359	0.984851	0.993829	1.02381	1.00785	1.0085	1.02401	0.306516
644993093	PREDICTED: LOW QUALITY PROTEIN: THO complex subunit 4-A-like [Nasonia vitripennis]	27.0957	10.9751	14.51	1	2	0.990174	0.965629	0.876805	0.944202	1.20217	1.04236	0.908625	1.05105	1.11316	0.308089
216548700	guanine nucleotide-binding protein G(o) subunit alpha [Nasonia vitripennis]	40.3361	5.43994	30.23	2	9	1.10505	0.954364	1.05957	1.03966	0.963804	1.01693	0.971714	0.984149	0.946606	0.308255
345488169	PREDICTED: U6 snRNA-associated Sm-like protein LSm2 [Nasonia vitripennis]	10.7175	6.52197	20	1	1	1.18146	1.05856	0.93184	1.05729	0.868223	0.965733	1.03452	0.956158	0.904351	0.308343
156545487	PREDICTED: alpha-N-acetylglucosaminidase [Nasonia vitripennis]	86.8255	7.43018	4.11	1	2	1.19681	0.876238	1.13423	1.06909	0.977871	0.921569	0.960336	0.953259	0.89165	0.309081
645008813	PREDICTED: neprilysin-2-like [Nasonia vitripennis]	77.7276	9.05615	3.89	1	2	0.827861	0.880169	1.11375	0.940593	1.03896	1.08163	1.01491	1.04517	1.11118	0.309986
156545148	PREDICTED: tetratricopeptide repeat protein 36 homolog [Nasonia vitripennis]	20.1072	5.22412	5.49	1	1	0.815374	0.74582	1.18691	0.916036	1.01201	1.10142	1.12574	1.07972	1.17869	0.310886
645000707	PREDICTED: CD109 antigen [Nasonia vitripennis]	187.249	6.41748	7.22	1	9	1.19821	0.961648	0.9987	1.05285	0.994683	0.981594	0.911842	0.962707	0.91438	0.311214
645028361	PREDICTED: protein kinase C isoform X1 [Nasonia vitripennis]	83.4053	6.78564	5.84	3	3	1.20722	0.980359	0.963324	1.0503	1.00202	0.917608	0.945025	0.954884	0.909153	0.311568
645002850	PREDICTED: carnitine O-acetyltransferase-like isoform X5 [Nasonia vitripennis]	70.0445	8.08936	27.26	4	14	1.02872	1.03185	0.995148	1.01857	1.00875	0.999855	1.00544	1.00468	0.986366	0.312608
645032023	PREDICTED: histone RNA hairpin-binding protein [Nasonia vitripennis]	30.5257	4.99561	7.55	1	1	0.989685	1.00649	0.940717	0.978963	1.08835	1.03668	0.958879	1.02797	1.05006	0.312943
644996871	PREDICTED: protein prune homolog [Nasonia vitripennis]	40.8684	5.13525	12.74	1	4	1.09672	0.984281	1.01564	1.03221	0.980232	1.02642	0.952381	0.986345	0.955565	0.313912
156547017	PREDICTED: 4-coumarate--CoA ligase 1-like [Nasonia vitripennis]	60.3472	7.04932	30.46	1	12	1.04666	0.959416	0.921497	0.975858	1.03934	0.988463	1.04065	1.02282	1.04812	0.314345
345492367	PREDICTED: protein unc-45 homolog B [Nasonia vitripennis]	105.829	6.43018	13	1	12	1.03723	0.959922	0.891214	0.96279	1.05382	1.00334	0.991022	1.01606	1.05533	0.314449
156550115	PREDICTED: protein vestigial [Nasonia vitripennis]	39.308	7.2251	4.08	1	1	1.16075	0.975504	1.0073	1.04785	1.04436	0.939701	0.923272	0.969111	0.924857	0.315153
645027755	PREDICTED: uncharacterized protein LOC100114668 isoform X2 [Nasonia vitripennis]	68.0061	6.3667	6.7	1	4	0.916717	0.975356	1.00337	0.965148	0.977375	0.994558	1.02218	0.998038	1.03408	0.315285
229577134	glycine N-methyltransferase-like [Nasonia vitripennis]	33.3809	6.18896	26.53	1	8	0.957143	1.17975	0.997472	1.04479	0.902529	0.939309	1.02564	0.955827	0.914854	0.315502
645038104	PREDICTED: uncharacterized protein LOC100116348 isoform X3 [Nasonia vitripennis]	48.6464	5.96045	4.32	3	2	0.797977	0.972768	1.05425	0.941664	0.945938	1.0712	1.12569	1.04761	1.11251	0.315687
644998955	PREDICTED: Y+L amino acid transporter 2 isoform X2 [Nasonia vitripennis]	54.6451	8.36768	3.99	1	2	1.16989	0.951464	1.0256	1.04899	1.00829	0.930477	0.974644	0.971137	0.925786	0.315957
645022961	PREDICTED: LETM1 and EF-hand domain-containing protein anon-60Da, mitochondrial-like [Nasonia vitripennis]	31.0193	5.30029	27.41	1	7	0.928865	1.04207	0.984677	0.985203	1.03212	1.00285	1.03903	1.02467	1.04006	0.316613
645008246	PREDICTED: fatty acid synthase-like isoform X2 [Nasonia vitripennis]	262.974	7.09326	24.98	2	47	0.908839	0.954881	1.05267	0.972131	1.04728	1.00604	1.01472	1.02268	1.052	0.316804
268607724	cuticular protein RR-2 family member 9 precursor [Nasonia vitripennis]	27.6463	5.42725	9.06	1	2	1.97757	0.919153	0.825702	1.24081	0.744405	0.906176	0.794939	0.815174	0.65697	0.316871
156538136	PREDICTED: proteasome subunit alpha type-2 [Nasonia vitripennis]	25.8821	7.82568	47.01	1	9	0.97251	0.987183	0.973997	0.977897	0.965016	1.07218	1.00485	1.01401	1.03693	0.317062
645013621	PREDICTED: proteasome activator complex subunit 3 isoform X4 [Nasonia vitripennis]	27.8524	6.53662	20.25	5	3	0.909201	0.988065	1.02378	0.973682	0.971502	1.0244	1.09064	1.02885	1.05666	0.317175
300795397	uncharacterized protein LOC100499172 [Nasonia vitripennis]	71.0581	6.91748	1.82	1	1	0.912852	1.12653	0.792585	0.943989	1.09605	1.03141	1.0457	1.05772	1.12048	0.317203
645011109	PREDICTED: acetyl-CoA acetyltransferase, mitochondrial [Nasonia vitripennis]	45.7328	8.80713	42.23	1	13	1.02028	1.03664	0.988571	1.01516	0.986568	1.00583	1.00092	0.997771	0.982866	0.31762
645036532	PREDICTED: ribulose-phosphate 3-epimerase [Nasonia vitripennis]	24.8925	5.45264	14.91	1	3	0.874223	1.06289	0.96163	0.966248	1.04627	0.998885	1.04804	1.03107	1.06708	0.317782
300117076	ubiquitin carboxyl-terminal hydrolase 7 [Nasonia vitripennis]	128.65	5.63037	14.79	2	15	0.968987	1.01192	0.982476	0.987796	1.00371	0.993408	1.01427	1.0038	1.0162	0.317913
345485754	PREDICTED: hemicentin-1-like [Nasonia vitripennis]	58.88	8.19189	6.53	1	2	1.16079	0.992994	0.989173	1.04765	1.00257	1.01363	0.892342	0.969514	0.925418	0.318021
645007696	PREDICTED: succinyl-CoA ligase [ADP/GDP-forming] subunit alpha, mitochondrial [Nasonia vitripennis]	35.0762	8.93896	37.65	1	13	0.970206	1.02541	1.05822	1.01795	0.980164	0.970187	1.00779	0.986046	0.968662	0.318698
645030298	PREDICTED: junctophilin-1 isoform X1 [Nasonia vitripennis]	108.979	9.72998	4.7	3	4	1.20951	0.957351	0.996104	1.05432	0.981829	0.923642	0.981863	0.962445	0.912857	0.318793
645002925	PREDICTED: probable DNA replication complex GINS protein PSF2 [Nasonia vitripennis]	21.0588	5.40186	9.63	1	1	0.925302	1.01048	0.929775	0.955184	0.965771	1.1817	0.97598	1.04115	1.09	0.318905
345483632	PREDICTED: alpha-methylacyl-CoA racemase [Nasonia vitripennis]	42.2164	6.93213	11.52	1	4	1.10677	0.996376	1.0197	1.04095	0.973567	0.96919	1.04089	0.994549	0.955425	0.319211
156545980	PREDICTED: activator of 90 kDa heat shock protein ATPase homolog 1 [Nasonia vitripennis]	39.1526	7.6792	25.29	1	8	0.9842	1.01864	0.930777	0.977873	1.02184	0.993734	1.0095	1.00836	1.03117	0.319251
156536897	PREDICTED: CCHC-type zinc finger protein CG3800 isoform X2 [Nasonia vitripennis]	17.1794	8.22119	39.35	2	8	0.913688	1.09142	0.843188	0.949433	1.00503	1.02839	1.07658	1.03667	1.09188	0.319442
645026788	PREDICTED: probable dolichol-phosphate mannosyltransferase [Nasonia vitripennis]	28.1637	8.44092	19.12	1	5	0.964574	0.984328	1.00113	0.983343	0.979958	0.999784	1.04701	1.00892	1.02601	0.319532
644996356	PREDICTED: eukaryotic translation initiation factor 3 subunit I isoform X2 [Nasonia vitripennis]	36.1004	5.93506	25.78	2	8	0.913089	1.04435	0.959248	0.97223	0.995723	1.0438	1.01635	1.01863	1.04772	0.319889
156537864	PREDICTED: histone H2B-like [Nasonia vitripennis]	14.3118	10.1841	38.46	1	1	1.17678	0.782345	1.45046	1.13653	1.0188	0.75909	0.92386	0.900582	0.792398	0.320482
289177012	glutathione S-transferase S6 [Nasonia vitripennis]	23.4169	6.94678	27.23	2	3	1.16347	0.953026	1.03729	1.05126	1.00071	0.926046	1.00228	0.976347	0.928739	0.320539
266457866	alcohol dehydrogenase-like [Nasonia vitripennis]	28.9313	6.41748	60.9	11	9	0.924583	1.12103	1.08903	1.04488	0.996104	0.910339	0.998997	0.96848	0.926881	0.32061
156545611	PREDICTED: uncharacterized protein LOC100119467 [Nasonia vitripennis]	26.4989	7.38623	6.9	1	2	1.29851	1.00918	0.918149	1.07528	0.920151	0.994361	0.912034	0.942182	0.876219	0.321047
156546944	PREDICTED: 40S ribosomal protein S12 isoform X2 [Nasonia vitripennis]	15.3158	5.78271	65	2	8	0.866833	1.01592	1.00599	0.962914	0.980612	1.0301	1.05887	1.02319	1.0626	0.321107
156542038	PREDICTED: guanine nucleotide-binding protein G(i) subunit alpha-like [Nasonia vitripennis]	40.3712	5.65576	4.78	1	1	0.807849	1.09239	0.953922	0.951386	1.09571	1.00768	1.04239	1.04859	1.10217	0.321751
645000937	PREDICTED: COP9 signalosome complex subunit 5 isoform X3 [Nasonia vitripennis]	40.4432	5.23682	10.34	3	3	1.02187	1.00035	1.19638	1.07287	1.01719	0.936427	1.0319	0.995173	0.927584	0.321921
156551551	PREDICTED: dolichyl-diphosphooligosaccharide--protein glycosyltransferase subunit 1 [Nasonia vitripennis]	69.1434	7.95752	40.23	1	21	0.940558	1.01304	0.990947	0.981514	0.981332	1.0114	1.05273	1.01515	1.03427	0.322145
229606086	lipid storage droplet 2 [Nasonia vitripennis]	31.5721	6.59521	42.96	1	10	0.93543	1.0582	0.980322	0.991317	1.03004	1.03477	1.03065	1.03182	1.04086	0.322258
156540916	PREDICTED: lachesin-like [Nasonia vitripennis]	36.6556	5.98584	3.64	1	1	1.17101	0.904822	1.08895	1.05493	0.962697	0.97725	0.957872	0.96594	0.915645	0.322546
345483015	PREDICTED: probable N-acetyltransferase san [Nasonia vitripennis]	18.8907	8.51416	26.99	1	4	0.937913	1.03036	0.98238	0.983552	0.976272	1.04844	1.04693	1.02388	1.041	0.322596
345481008	PREDICTED: uncharacterized protein LOC100679065 [Nasonia vitripennis]	48.5555	8.45557	4.62	1	2	0.977913	1.03466	0.969782	0.994118	1.04894	0.97888	1.07114	1.03299	1.0391	0.322745
645018326	PREDICTED: papilin [Nasonia vitripennis]	250.538	4.57666	13.63	1	30	1.00165	0.976324	1.03621	1.00473	0.99175	0.981541	0.981045	0.984779	0.980146	0.322839
645017438	PREDICTED: venom protein H isoform X1 [Nasonia vitripennis]	11.3979	8.36768	41.58	2	4	0.779303	0.760873	1.18091	0.90703	1.0307	1.17906	1.00812	1.07263	1.18257	0.323412
645016030	PREDICTED: exportin-1 [Nasonia vitripennis]	122.223	5.74463	11.79	1	11	0.96364	1.02658	0.909526	0.966581	1.01346	1.02418	0.983267	1.00697	1.04178	0.324376
156543370	PREDICTED: electron transfer flavoprotein subunit beta [Nasonia vitripennis]	27.2696	7.81104	62.85	1	13	0.990449	1.02571	1.00984	1.00867	1.01563	0.970962	0.982846	0.989812	0.981306	0.324632
156547253	PREDICTED: lambda-crystallin homolog [Nasonia vitripennis]	35.6386	6.81494	52.68	1	13	1.067	1.03277	0.977194	1.02566	1.01649	0.959587	0.996517	0.990863	0.966078	0.324886
644997122	PREDICTED: 60S ribosomal protein L32 [Nasonia vitripennis]	16.0348	11.3999	38.06	1	6	0.921266	0.996982	1.00173	0.973327	0.982826	0.997321	1.05379	1.01131	1.03903	0.325005
156541992	PREDICTED: 10 kDa heat shock protein, mitochondrial [Nasonia vitripennis]	11.2182	9.0415	78.85	1	9	0.971307	1.03955	0.93397	0.981609	1.04494	0.995916	1.0183	1.01972	1.03882	0.325128
645036956	PREDICTED: carnitine O-palmitoyltransferase 2, mitochondrial [Nasonia vitripennis]	75.2875	8.60205	25.26	1	14	1.01781	0.985167	0.943956	0.98231	1.00584	1.05003	0.98663	1.01417	1.03243	0.325357
289629294	heat shock cognate 70 [Nasonia vitripennis]	71.2363	5.45264	56.34	1	20	0.960763	1.02429	0.968717	0.984591	1.02039	1.02203	0.988083	1.01017	1.02598	0.325386
300360563	39S ribosomal protein L17, mitochondrial [Nasonia vitripennis]	20.796	9.70068	12.29	2	2	0.833992	1.0381	0.980483	0.950858	0.936582	1.1134	1.07437	1.04145	1.09527	0.326222
645004097	PREDICTED: fasciclin-3, partial [Nasonia vitripennis]	55.0411	7.94287	26.91	1	12	1.13795	0.963828	0.985711	1.02916	1.00485	0.956389	0.927726	0.962987	0.9357	0.326262
156547950	PREDICTED: ATPase family AAA domain-containing protein 3 [Nasonia vitripennis]	69.1405	9.1001	34.94	1	22	0.951152	1.00221	0.985098	0.979486	0.997492	0.978306	1.05213	1.00931	1.03045	0.326956
645003255	PREDICTED: probable nucleoporin Nup54 isoform X2 [Nasonia vitripennis]	47.8182	7.62061	5.12	2	2	1.13034	0.956688	1.01578	1.03427	1.05804	0.935675	0.830787	0.941501	0.910306	0.326961
345498449	PREDICTED: gamma-glutamyltranspeptidase 1 [Nasonia vitripennis]	70.8979	6.06201	46.52	1	24	0.762178	0.827881	1.16613	0.918731	1.0269	1.10633	1.04911	1.06078	1.15462	0.327196
645015297	PREDICTED: DNA topoisomerase 3-beta-1 isoform X2 [Nasonia vitripennis]	89.4468	7.84033	2	2	1	1.32001	0.965859	0.966495	1.08412	1.0005	0.97528	0.85407	0.943284	0.87009	0.327306
645012315	PREDICTED: 60S ribosomal protein L15 [Nasonia vitripennis]	23.8151	11.6196	33.33	1	7	0.914098	1.03376	0.986578	0.978145	1.0003	1.01236	1.0473	1.01999	1.04278	0.327519
645016844	PREDICTED: LOW QUALITY PROTEIN: muscle M-line assembly protein unc-89 [Nasonia vitripennis]	643.876	5.66846	27.21	1	133	1.04813	0.983906	1.01338	1.01514	0.996728	0.986063	0.999161	0.993984	0.979159	0.327715
156554912	PREDICTED: ragulator complex protein LAMTOR2 homolog [Nasonia vitripennis]	13.7443	8.74854	18.25	1	2	0.874872	1.008	0.988132	0.957	0.947889	1.14455	1.01589	1.03611	1.08267	0.327756
156549024	PREDICTED: 26S proteasome non-ATPase regulatory subunit 6 [Nasonia vitripennis]	45.3943	6.11279	44.73	1	17	0.898325	1.01802	1.01158	0.975977	0.997708	1.03789	1.02837	1.02132	1.04646	0.327815
345479197	PREDICTED: vanin-like protein 2 [Nasonia vitripennis]	63.3775	7.40088	7.99	1	3	1.03644	0.999589	1.01902	1.01835	1.00092	0.983093	1.02046	1.00149	0.983446	0.328428
156538581	PREDICTED: probable glutamine--tRNA ligase [Nasonia vitripennis]	88.2558	7.29834	5.96	1	4	0.932081	1.04067	0.960798	0.977851	1.00282	1.08037	0.992712	1.0253	1.04852	0.328603
645036352	PREDICTED: protein FAM188A homolog [Nasonia vitripennis]	50.2295	4.83057	5.83	1	1	0.961062	0.906701	1.05809	0.975284	0.990677	1.02931	1.07386	1.03128	1.05742	0.328636
645040495	PREDICTED: epidermal growth factor receptor substrate 15-like 1 [Nasonia vitripennis]	20.5998	5.16064	20.11	1	2	1.02873	0.986523	1.04687	1.02071	0.953761	1.03091	0.981589	0.988753	0.968694	0.329141
645022557	PREDICTED: proteasome-associated protein ECM29 homolog isoform X2 [Nasonia vitripennis]	202.489	7.63525	9.71	4	14	0.994986	1.02324	0.999235	1.00582	1.01516	1.01418	1.0176	1.01565	1.00977	0.329413
645000671	PREDICTED: nuclease-sensitive element-binding protein 1 [Nasonia vitripennis]	33.0691	10.0083	35.76	1	7	0.917199	1.08213	0.918798	0.97271	1.03299	1.05295	1.01745	1.03447	1.06349	0.329498
345492121	PREDICTED: low-density lipoprotein receptor-related protein 2-like [Nasonia vitripennis]	83.6517	7.81104	3.15	1	2	1.10537	1.00478	0.981898	1.03068	0.956633	0.96233	1.02658	0.981849	0.952621	0.329866
283046761	fructose-bisphosphate aldolase isoform A [Nasonia vitripennis]	39.3925	7.10791	78.9	1	2	0.981621	1.02477	1.05395	1.02011	1.01507	0.966807	0.994615	0.992165	0.972602	0.330247
645027716	PREDICTED: ornithine decarboxylase 2-like [Nasonia vitripennis]	50.0441	6.18896	27.25	1	13	1.01848	0.979781	1.09178	1.03002	1.02451	0.962049	0.977983	0.98818	0.959384	0.330601
345480784	PREDICTED: GTP cyclohydrolase 1 isoform X2 [Nasonia vitripennis]	26.1883	7.48877	12.5	2	3	1.16096	1.12032	0.910886	1.06405	0.968443	0.938254	1.01735	0.974682	0.916007	0.330898
644995305	PREDICTED: elongation of very long chain fatty acids protein AAEL008004 isoform X2 [Nasonia vitripennis]	38.2421	9.27588	6.67	2	2	0.976647	1.01707	1.00226	0.998658	1.0511	1.03712	0.985051	1.02442	1.0258	0.33096
156549254	PREDICTED: PRKCA-binding protein isoform X4 [Nasonia vitripennis]	60.2756	5.021	1.85	4	1	1.27814	1.0181	0.952197	1.08281	0.98765	0.819152	1.04331	0.950038	0.877381	0.331202
645017552	PREDICTED: serine/threonine-protein phosphatase 2A 56 kDa regulatory subunit epsilon isoform isoform X4 [Nasonia vitripennis]	50.8715	5.79541	23.45	4	7	1.12544	0.930238	1.00138	1.01902	0.961129	0.928435	0.973359	0.954308	0.936496	0.331353
345483357	PREDICTED: low-density lipoprotein receptor-related protein 4-like [Nasonia vitripennis]	37.1171	6.06201	18.18	2	5	0.973355	0.970176	1.00117	0.981568	0.961074	1.02565	1.05662	1.01445	1.0335	0.332037
156555035	PREDICTED: major royal jelly protein 1 [Nasonia vitripennis]	40.913	9.0708	2.95	1	1	1.07768	0.925142	1.18825	1.06369	1.04228	0.989883	0.829853	0.954006	0.896881	0.332163
645027540	PREDICTED: haloacid dehalogenase-like hydrolase domain-containing protein 2 isoform X2 [Nasonia vitripennis]	28.1551	6.82959	19.07	2	3	1.02307	0.988508	0.950997	0.987525	1.0094	1.00599	1.01679	1.01072	1.02349	0.332374
156548266	PREDICTED: GTPase Era, mitochondrial [Nasonia vitripennis]	38.6616	8.74854	2.6	1	1	1.05434	0.934701	0.898567	0.962535	0.939926	1.12546	1.05949	1.04163	1.08217	0.332853
239048185	serine protease 97 precursor [Nasonia vitripennis]	31.5912	7.13721	49.49	1	8	0.776333	0.856375	1.16097	0.931225	1.047	1.17457	0.996049	1.07254	1.15175	0.333651
645006644	PREDICTED: long-chain fatty acid transport protein 4-like [Nasonia vitripennis]	70.4108	8.51416	31.8	1	17	0.919865	1.05006	0.984741	0.984889	1.02909	1.02563	1.02389	1.0262	1.04195	0.333708
289684253	cuticular protein RR-2 family member 8 precursor [Nasonia vitripennis]	22.4461	8.60205	51.34	1	8	1.52555	0.930811	0.913669	1.12334	0.901572	0.954283	0.843948	0.899934	0.801122	0.334283
156545822	PREDICTED: endoplasmic reticulum resident protein 44 isoform X3 [Nasonia vitripennis]	47.1958	6.18896	24.88	3	8	1.00525	0.993798	1.01596	1.005	0.998049	1.0203	1.05628	1.02488	1.01977	0.334633
645027100	PREDICTED: 40S ribosomal protein S14 [Nasonia vitripennis]	16.2116	10.4478	50.33	1	8	1.07981	0.998333	0.991372	1.02317	1.00652	0.98194	0.984341	0.990935	0.968492	0.335156
239050555	glucose dehydrogenase-like venom protein [Nasonia vitripennis]	66.5355	5.56689	23.47	5	12	0.880937	0.807896	1.11984	0.936223	1.07955	1.03171	1.01327	1.04151	1.11246	0.335435
644995805	PREDICTED: cathepsin L1-like [Nasonia vitripennis]	38.4313	5.69385	8.38	1	2	0.866116	1.0708	0.938685	0.958533	1.02017	1.09456	0.984394	1.03304	1.07773	0.335606
156542789	PREDICTED: coiled-coil-helix-coiled-coil-helix domain-containing protein 10, mitochondrial isoform X2 [Nasonia vitripennis]	14.5681	8.57275	11.41	1	2	0.996693	0.958248	1.12355	1.02616	0.894556	1.03934	0.926535	0.953478	0.929167	0.335817
645013484	PREDICTED: eukaryotic translation initiation factor 4 gamma 2 [Nasonia vitripennis]	104.506	7.86963	12.53	1	10	1.01706	1.0228	0.928115	0.989325	1.01916	1.03322	1.01741	1.02326	1.0343	0.335869
645026009	PREDICTED: Golgi apparatus protein 1 [Nasonia vitripennis]	131.183	7.23975	1.4	1	1	1.24398	0.877156	1.11056	1.07723	1.03528	0.900404	0.918274	0.95132	0.883113	0.335949
645039564	PREDICTED: myosin-IIIb isoform X5 [Nasonia vitripennis]	162.252	6.72705	18.56	5	23	1.05434	0.959103	1.09006	1.0345	0.996054	0.97802	0.999563	0.991212	0.958157	0.33629
156548066	PREDICTED: EKC/KEOPS complex subunit Tprkb-like [Nasonia vitripennis]	20.773	6.06201	19.13	1	3	1.00316	0.966591	1.00985	0.993202	1.01365	0.995696	1.02049	1.00994	1.01686	0.336543
645004430	PREDICTED: 60S ribosome subunit biogenesis protein NIP7 homolog [Nasonia vitripennis]	20.2325	8.90967	16.67	1	2	1.14241	1.10849	0.909252	1.05338	1.06916	0.937351	0.816312	0.940942	0.893256	0.336554
645009642	PREDICTED: putative uncharacterized protein DDB_G0271606 [Nasonia vitripennis]	54.8625	9.14404	7.76	1	4	1.14245	1.07838	0.893474	1.0381	0.898953	0.952087	1.00079	0.950611	0.91572	0.336758
156552012	PREDICTED: stress-induced-phosphoprotein 1 [Nasonia vitripennis]	62.514	7.21045	41.35	1	22	0.914957	1.08109	0.894635	0.963562	1.02764	1.05112	1.00895	1.02924	1.06816	0.337331
645012286	PREDICTED: protein CREG1-like [Nasonia vitripennis]	23.1476	6.39209	36.84	1	5	1.03571	0.929134	0.911578	0.958807	0.960038	1.10987	0.999959	1.02329	1.06725	0.337668
645011600	PREDICTED: shematrin-like protein 2 [Nasonia vitripennis]	18.5186	8.88037	5.2	1	1	1.16603	0.882431	1.16459	1.07101	0.945838	0.97225	0.984866	0.967652	0.903491	0.33771
345496658	PREDICTED: microsomal triglyceride transfer protein large subunit [Nasonia vitripennis]	97.5558	8.20654	17.63	1	13	1.01588	0.981056	1.01981	1.00558	0.962311	0.968297	1.01688	0.982496	0.977043	0.337764
156548625	PREDICTED: hydroxysteroid dehydrogenase-like protein 2 [Nasonia vitripennis]	44.0787	8.6167	55.75	2	20	0.986223	1.05819	1.00258	1.01567	0.971724	1.01715	0.971482	0.986787	0.971566	0.337876
156553050	PREDICTED: probable enoyl-CoA hydratase, mitochondrial [Nasonia vitripennis]	15.7623	9.14404	52.05	1	6	0.942508	0.995542	1.01741	0.985152	0.988534	1.01297	1.04266	1.01472	1.03002	0.337956
645034592	PREDICTED: guanine nucleotide-binding protein G(q) subunit alpha isoform X4 [Nasonia vitripennis]	40.3673	4.85596	36.05	4	11	1.17638	0.959569	1.01041	1.04879	0.970108	0.994663	0.966185	0.976986	0.931539	0.33823
156546390	PREDICTED: protein takeout-like [Nasonia vitripennis]	28.5568	6.53662	3.53	1	1	0.826988	0.992908	1.06113	0.960342	1.06997	0.98556	1.07004	1.04186	1.08488	0.338237
645010378	PREDICTED: protein tumorous imaginal discs, mitochondrial-like isoform X5 [Nasonia vitripennis]	55.7809	9.24658	9.92	5	4	0.972495	1.02783	0.977328	0.992552	1.00211	1.01045	1.02786	1.01347	1.02108	0.338269
156537217	PREDICTED: COP9 signalosome complex subunit 3 [Nasonia vitripennis]	49.7112	5.51611	2.27	1	1	1.01046	1.02336	0.919936	0.984584	1.05154	1.02306	0.99697	1.02386	1.03989	0.338435
645034072	PREDICTED: synaptogyrin-2 [Nasonia vitripennis]	27.8975	7.89893	10.12	1	2	1.02106	1.09455	0.994596	1.03674	1.0419	0.999371	0.906166	0.98248	0.947665	0.33894
156545848	PREDICTED: alpha-tocopherol transfer protein-like [Nasonia vitripennis]	34.901	7.6499	2.32	1	1	0.850362	0.852005	1.9129	1.20509	0.802123	0.906872	0.7439	0.817632	0.678483	0.33894
645011555	PREDICTED: DNA ligase 1-like [Nasonia vitripennis]	74.9024	5.59229	15.45	2	10	0.937692	1.01807	0.998459	0.984741	1.04962	0.994215	1.00626	1.0167	1.03245	0.339184
645022700	PREDICTED: U6 snRNA-associated Sm-like protein LSm1 isoform X2 [Nasonia vitripennis]	13.4351	5.92236	22.41	2	2	0.929765	0.971268	1.01592	0.972319	1.007	0.962021	1.13209	1.03371	1.06313	0.339376
288856345	ATP synthase subunit O, mitochondrial [Nasonia vitripennis]	22.2902	9.81787	71.98	1	15	0.99546	0.988881	1.08126	1.02187	0.99593	0.972582	0.997065	0.988525	0.96737	0.34003
156555000	PREDICTED: neuroplastin isoform X1 [Nasonia vitripennis]	40.149	5.59229	19.28	2	5	1.05396	0.983109	1.01999	1.01902	1.02601	0.971271	0.970549	0.989276	0.97081	0.340175
645028218	PREDICTED: cytoplasmic polyadenylation element-binding protein 2 [Nasonia vitripennis]	80.4745	6.771	2.26	1	1	1.24977	0.934314	1.00891	1.06433	0.982141	0.991523	0.894674	0.956112	0.898322	0.3403
209969815	nuclear transcription factor Y, gamma isoform 1 [Nasonia vitripennis]	35.386	5.021	3.74	2	1	1.09902	1.02846	1.13151	1.08633	0.991247	0.707809	1.13857	0.945875	0.870705	0.340773
645034883	PREDICTED: cytoskeleton-associated protein 5, partial [Nasonia vitripennis]	212.908	6.85889	6.93	1	10	0.951786	1.04323	0.954366	0.983126	0.992195	1.03851	1.02587	1.01886	1.03634	0.340913
156542598	PREDICTED: persulfide dioxygenase ETHE1, mitochondrial isoform X2 [Nasonia vitripennis]	27.9701	8.19189	37.45	2	8	1.01883	1.00841	0.986629	1.00462	1.01859	0.976131	0.936424	0.977049	0.972553	0.341244
645002868	PREDICTED: SHC-transforming protein 1 isoform X2 [Nasonia vitripennis]	48.4311	7.00537	2.71	2	1	1.07638	0.934078	1.1171	1.04252	1.01778	0.929362	0.982535	0.976561	0.936732	0.341405
156550376	PREDICTED: conserved oligomeric Golgi complex subunit 6 [Nasonia vitripennis]	71.742	6.16357	3.63	1	2	1.03174	0.891585	1.00071	0.974681	1.03206	0.975095	1.09329	1.03348	1.06033	0.341415
156551722	PREDICTED: CDGSH iron-sulfur domain-containing protein 2 homolog [Nasonia vitripennis]	14.5824	8.47021	29.01	1	3	0.91618	0.98013	1.02342	0.973245	0.962369	1.05267	1.04074	1.01859	1.04659	0.342044
289177173	cytochrome P450 6AS31 [Nasonia vitripennis]	57.7098	8.646	2.2	1	1	1.10576	0.958704	1.11295	1.05914	0.987536	0.834834	1.07606	0.966144	0.912199	0.343082
289177134	cytochrome P450 4AB18 [Nasonia vitripennis]	59.436	8.80713	3.54	14	1	1.09157	0.9236	1.12796	1.04771	1.02745	0.977966	0.904625	0.970014	0.925842	0.343323
345480569	PREDICTED: trypsin-1 [Nasonia vitripennis]	27.4829	6.02393	6.2	1	1	1.40628	0.970011	0.931432	1.10257	0.949853	1.0176	0.812851	0.926767	0.84055	0.343408
645012052	PREDICTED: T-complex protein 1 subunit alpha isoform X1 [Nasonia vitripennis]	59.8614	6.34131	39.68	2	19	0.88025	1.03271	0.996101	0.969688	1.00349	1.07591	0.998208	1.02587	1.05794	0.343557
239787108	aspartylglucosaminidase precursor [Nasonia vitripennis]	37.1813	7.41553	10.72	1	3	0.994386	0.831914	0.938139	0.921479	0.904255	1.22602	0.981778	1.03735	1.12574	0.34383
345482186	PREDICTED: histone deacetylase 5 [Nasonia vitripennis]	104.11	7.23975	2.29	1	1	1.0668	1.03948	0.976786	1.02769	1.00253	1.0252	0.927257	0.984996	0.958455	0.344091
645008909	PREDICTED: C-Myc-binding protein homolog [Nasonia vitripennis]	11.741	5.33838	8.82	1	1	0.91757	1.07744	0.92844	0.974483	1.032	1.02021	1.03775	1.02999	1.05696	0.344531
283135236	mitochondrial-processing peptidase subunit alpha [Nasonia vitripennis]	60.1628	7.00537	16.97	3	7	0.971931	0.972189	1.01204	0.985388	0.959617	1.046	1.06018	1.02193	1.03709	0.344662
345486322	PREDICTED: spindle assembly checkpoint component MAD1-like [Nasonia vitripennis]	53.2742	5.21143	3.62	1	1	1.55266	0.814507	1.05575	1.14097	0.976188	0.938229	0.786641	0.900352	0.789111	0.344908
345486048	PREDICTED: glycerophosphodiester phosphodiesterase 1-like [Nasonia vitripennis]	42.0201	7.57666	15.34	1	5	1.08224	0.963441	0.90213	0.982603	1.06495	0.995176	1.07572	1.04528	1.06379	0.344952
644995612	PREDICTED: beta-ureidopropionase-like, partial [Nasonia vitripennis]	40.9205	6.53662	12.84	1	3	1.0177	1.00853	1.06418	1.03014	1.00045	0.929318	1.0417	0.990489	0.961512	0.345044
645034232	PREDICTED: uncharacterized protein LOC100680442 isoform X3 [Nasonia vitripennis]	125.017	8.1626	1.37	3	1	1.21371	1.04239	0.952997	1.0697	1.05997	0.799034	0.99807	0.952357	0.890302	0.345246
156537727	PREDICTED: CAAX prenyl protease 1 homolog [Nasonia vitripennis]	56.4433	6.48096	4.73	1	2	0.846071	1.04868	0.980537	0.958428	0.998013	1.00861	1.07421	1.02694	1.07149	0.345437
345493218	PREDICTED: probable ATP-dependent RNA helicase DDX17 isoform X3 [Nasonia vitripennis]	65.6301	10.1987	6.62	3	2	1.24451	1.01199	0.936873	1.06446	1.04012	0.927727	0.898025	0.95529	0.897445	0.345679
345480198	PREDICTED: clustered mitochondria protein homolog [Nasonia vitripennis]	154.558	6.29053	8.23	1	12	0.963077	1.04831	0.924658	0.978683	1.01349	1.01277	1.0279	1.01805	1.04023	0.345767
645032763	PREDICTED: transportin-1 [Nasonia vitripennis]	111.413	5.74463	6.55	1	6	0.991765	0.972856	0.921824	0.962148	1.0563	0.934763	1.03164	1.00757	1.04721	0.3461
645031364	PREDICTED: elongation factor 1-gamma [Nasonia vitripennis]	49.0317	6.06201	40.71	1	16	0.881204	1.04366	1.00384	0.976233	0.995821	1.03171	1.0731	1.03354	1.05871	0.346334
645017135	PREDICTED: alpha-2-macroglobulin receptor-associated protein [Nasonia vitripennis]	42.9875	8.1626	2.44	1	1	1.38376	0.922772	0.980747	1.09576	0.865946	0.939884	1.00275	0.936195	0.854381	0.348142
156548602	PREDICTED: V-type proton ATPase 116 kDa subunit a isoform 1 isoform X4 [Nasonia vitripennis]	97.2307	6.65381	21.8	4	1	1.10058	0.928567	1.09556	1.04157	1.00881	0.939569	0.985031	0.977805	0.93878	0.348222
645037419	PREDICTED: epithelial splicing regulatory protein 2 [Nasonia vitripennis]	87.6177	8.08936	2.52	1	2	1.23682	0.911457	1.04654	1.06494	1.00941	0.869888	0.985271	0.954856	0.89663	0.348401
156544546	PREDICTED: probable small nuclear ribonucleoprotein Sm D2 isoform X1 [Nasonia vitripennis]	13.5762	9.99365	48.33	2	5	0.866654	0.975231	0.997392	0.946425	0.967007	1.04729	0.976684	0.996993	1.05343	0.348548
645006903	PREDICTED: protein cornichon [Nasonia vitripennis]	17.9483	7.37158	15.58	1	1	0.910299	0.883805	1.06954	0.954549	0.918994	1.10191	1.11618	1.04569	1.09549	0.348933
345484558	PREDICTED: uncharacterized protein LOC100679220 [Nasonia vitripennis]	47.0678	6.55127	10.61	1	4	0.875166	1.00444	1.01833	0.96598	0.944527	1.08511	1.0714	1.03368	1.07008	0.348989
156541512	PREDICTED: L-selectin [Nasonia vitripennis]	24.7022	7.62061	13.82	1	2	1.31755	0.951608	1.00555	1.09157	0.971673	1.04189	0.862338	0.958634	0.878217	0.349055
345491156	PREDICTED: pyruvate dehydrogenase phosphatase regulatory subunit, mitochondrial-like [Nasonia vitripennis]	102.346	8.11865	1.11	1	1	1.21794	0.869963	1.11771	1.06854	0.989961	0.927698	0.954271	0.95731	0.895906	0.3491
644999433	PREDICTED: FCH and double SH3 domains protein 2 isoform X3 [Nasonia vitripennis]	97.0942	4.729	10.43	3	8	1.11693	0.997497	0.973259	1.02923	0.974234	1.00363	0.96367	0.98051	0.952666	0.349142
645013481	PREDICTED: heterogeneous nuclear ribonucleoprotein F-like [Nasonia vitripennis]	58.9929	7.94287	13.68	1	7	1.08107	1.00156	0.995248	1.02596	1.01112	0.994144	0.980464	0.995243	0.970062	0.34932
156550715	PREDICTED: 60S ribosomal protein L7 [Nasonia vitripennis]	30.1209	10.5942	52.34	1	15	0.899265	1.03183	0.994755	0.975284	0.972056	1.03991	1.06895	1.02697	1.053	0.349432
156552593	PREDICTED: dehydrogenase/reductase SDR family member 11-like [Nasonia vitripennis]	26.5968	8.54346	44.13	2	9	0.838046	1.00796	1.01011	0.952038	0.961818	1.03913	1.05925	1.02006	1.07145	0.349553
156550753	PREDICTED: V-type proton ATPase 16 kDa proteolipid subunit [Nasonia vitripennis]	16.7089	8.39697	15.43	1	2	1.01959	1.06993	1.04088	1.04346	0.940146	1.10672	0.787718	0.944862	0.905505	0.350039
345479668	PREDICTED: cleavage and polyadenylation specificity factor subunit 5 isoform X2 [Nasonia vitripennis]	25.6914	9.0415	20.44	3	4	1.08316	0.939096	1.06141	1.02789	1.00671	0.865493	1.00571	0.959304	0.933277	0.350143
345494542	PREDICTED: T-complex protein 1 subunit zeta [Nasonia vitripennis]	57.9545	7.03467	46.89	1	21	0.925227	1.02995	1.00721	0.987463	1.00237	1.02287	1.04528	1.02351	1.0365	0.350511
644997747	PREDICTED: uncharacterized protein LOC100115024 [Nasonia vitripennis]	159.393	4.97021	19.66	1	8	0.765782	1.09895	0.924539	0.929756	0.971646	1.13397	1.02403	1.04321	1.12203	0.350544
644996657	PREDICTED: 39S ribosomal protein L19, mitochondrial [Nasonia vitripennis]	35.1873	8.22119	13.04	1	3	1.00945	0.953448	0.976626	0.979841	0.95588	1.02125	1.15541	1.04418	1.06566	0.350586
156553893	PREDICTED: probable phosphorylase b kinase regulatory subunit beta isoform X2 [Nasonia vitripennis]	125.405	6.3667	5.37	2	5	0.924283	1.02872	0.9845	0.979168	1.00729	1.02346	1.0044	1.01172	1.03324	0.350793
645014953	PREDICTED: B-cell receptor-associated protein 31-like [Nasonia vitripennis]	25.3855	9.02686	26.22	1	8	0.89439	1.06608	0.977775	0.979415	1.0538	1.01125	1.03472	1.03326	1.05497	0.351269
156548180	PREDICTED: uridine phosphorylase 1-like isoform X2 [Nasonia vitripennis]	38.4151	6.23975	13.49	2	3	1.10728	0.93366	1.05917	1.03337	0.947972	0.956008	1.01836	0.974115	0.942659	0.352193
238859577	yellow-b precursor [Nasonia vitripennis]	51.0668	6.25244	3.29	1	1	1.06801	0.932277	0.948263	0.982849	1.02916	1.02116	1.0338	1.02804	1.04598	0.352441
156552085	PREDICTED: 39S ribosomal protein L28, mitochondrial [Nasonia vitripennis]	33.1787	9.45166	12.19	1	3	1.03181	1.07654	0.990469	1.03294	0.971775	0.924201	1.05728	0.98442	0.953028	0.352791
645017152	PREDICTED: protein lap4 isoform X6 [Nasonia vitripennis]	218.001	5.21143	5.22	7	8	1.1515	0.918094	1.0504	1.04	0.975378	0.997778	0.923055	0.965404	0.928273	0.35339
345486118	PREDICTED: thioredoxin reductase 1, mitochondrial isoform X5 [Nasonia vitripennis]	53.5578	6.87354	40.04	5	15	0.941865	0.990479	1.00642	0.979587	1.00457	1.03475	0.978867	1.00606	1.02703	0.353625
645013148	PREDICTED: cuticle protein 19 [Nasonia vitripennis]	22.2637	6.46826	10.85	1	2	1.07588	1.03381	0.973652	1.02778	1.02436	0.940003	0.997264	0.987208	0.960524	0.353706
645018113	PREDICTED: N-acetylneuraminate lyase-like isoform X1 [Nasonia vitripennis]	35.0113	8.73389	30.7	2	8	0.933924	1.04338	1.06516	1.01416	0.96092	0.973826	0.979108	0.971285	0.957726	0.354362
645028609	PREDICTED: tRNA selenocysteine 1-associated protein 1 isoform X2 [Nasonia vitripennis]	30.7753	4.76709	10	2	2	1.17017	0.944503	1.00761	1.04076	0.927286	1.02124	0.944018	0.964182	0.92642	0.354443
156547261	PREDICTED: cystathionine gamma-lyase [Nasonia vitripennis]	42.6997	6.80029	16.75	1	6	0.935236	1.05133	0.971505	0.986025	0.986776	1.03714	1.06231	1.02874	1.04332	0.354769
645014845	PREDICTED: uncharacterized protein LOC100680227 isoform X2 [Nasonia vitripennis]	24.5457	6.39209	29.41	2	6	0.950567	0.929898	1.02929	0.969917	0.969905	1.032	1.01963	1.00718	1.03841	0.355948
156536911	PREDICTED: zinc finger CCCH domain-containing protein 15 homolog [Nasonia vitripennis]	46.0794	5.73193	5.17	1	2	0.866301	1.11534	0.896695	0.959445	1.05774	1.02489	1.04277	1.0418	1.08584	0.35611
645001763	PREDICTED: AP-3 complex subunit delta-1 [Nasonia vitripennis]	131.148	7.10791	2.67	1	2	1.04223	0.99433	0.932439	0.989665	1.1348	0.958569	1.06405	1.05247	1.06346	0.356147
645002093	PREDICTED: ubiquitin carboxyl-terminal hydrolase 5 isoform X2 [Nasonia vitripennis]	90.254	5.40186	18.52	2	14	0.929596	1.02686	0.997138	0.984531	1.00142	1.01534	1.03047	1.01574	1.0317	0.35655
156554393	PREDICTED: uncharacterized protein LOC100119416 [Nasonia vitripennis]	58.3484	6.99072	34.75	1	17	0.97388	1.00701	0.960487	0.980459	0.952294	1.02849	1.10277	1.02785	1.04834	0.357241
644993823	PREDICTED: LOW QUALITY PROTEIN: low-density lipoprotein receptor-related protein 2-like [Nasonia vitripennis]	495.158	5.33838	2.2	1	8	1.00072	1.05277	0.965604	1.00637	0.979316	0.994277	0.961044	0.978213	0.972025	0.357252
156551239	PREDICTED: troponin C, isoform 3 isoform X1 [Nasonia vitripennis]	18.1448	4.15771	56.6	2	7	1.00608	0.986187	0.991657	0.994641	0.988155	1.01208	1.01714	1.00579	1.01121	0.357356
289177106	carboxylesterase clade E, member 10 precursor [Nasonia vitripennis]	63.7579	5.99854	15.87	1	6	0.915273	1.065	0.917836	0.966035	0.975874	1.04277	1.05045	1.02303	1.059	0.357515
345496647	PREDICTED: histidine-rich glycoprotein-like [Nasonia vitripennis]	16.9122	6.84424	14.38	1	1	1.04418	0.960678	1.06352	1.02279	1.04224	0.950965	0.929423	0.974208	0.952496	0.357938
645001148	PREDICTED: glyoxylate reductase/hydroxypyruvate reductase [Nasonia vitripennis]	40.4747	8.85107	24.66	1	7	0.962762	1.02902	1.00227	0.998017	1.02106	1.00809	1.02735	1.01883	1.02086	0.358066
645015663	PREDICTED: peroxisomal membrane protein PER10 [Nasonia vitripennis]	21.6742	7.86963	12.89	1	2	0.888513	1.07118	0.962364	0.97402	1.02988	1.02305	1.03453	1.02915	1.05661	0.358224
345494466	PREDICTED: peptidyl-prolyl cis-trans isomerase B [Nasonia vitripennis]	22.5405	8.49951	43.75	1	9	0.73065	1.16376	0.892145	0.928853	1.0491	1.09963	1.03565	1.06146	1.14276	0.358259
283135230	replication protein A2 [Nasonia vitripennis]	28.0386	5.03369	7.91	1	1	1.34779	0.940356	0.974922	1.08769	1.03591	0.909182	0.8874	0.944165	0.868047	0.358321
156546282	PREDICTED: diamine acetyltransferase 2-like [Nasonia vitripennis]	19.4106	7.89893	11.38	1	2	0.906873	1.03967	0.982534	0.976358	1.00995	0.986353	1.08242	1.02624	1.05109	0.358342
644996114	PREDICTED: vacuolar protein sorting-associated protein 4B [Nasonia vitripennis]	49.2934	6.58057	17.01	1	8	0.977702	0.982718	0.958122	0.972847	1.05454	1.00232	0.954506	1.00379	1.0318	0.358428
345484547	PREDICTED: LOW QUALITY PROTEIN: peptidyl-prolyl cis-trans isomerase FKBP4 [Nasonia vitripennis]	51.2691	5.42725	19.74	1	7	0.933326	1.06147	0.937574	0.977458	1.03879	1.05476	0.984982	1.02618	1.04985	0.35873
156548815	PREDICTED: ER membrane protein complex subunit 8/9 homolog [Nasonia vitripennis]	22.9336	6.34131	19.42	1	3	1.02956	0.952591	1.07368	1.01861	0.949226	0.995937	0.991469	0.978877	0.960993	0.359068
645027517	PREDICTED: secretory carrier-associated membrane protein 5 [Nasonia vitripennis]	38.3421	6.32861	11.43	1	3	0.928409	1.05742	0.867581	0.951137	1.02765	1.00629	0.995658	1.00987	1.06175	0.35921
156549496	PREDICTED: ER membrane protein complex subunit 10 [Nasonia vitripennis]	25.0456	5.38916	6.93	1	1	0.878206	1.06071	0.958453	0.96579	0.981568	1.10611	1.01088	1.03285	1.06944	0.359343
645000733	PREDICTED: uncharacterized protein LOC100124285 [Nasonia vitripennis]	306.062	7.29834	18.81	1	44	1.03488	0.95355	0.96526	0.984563	0.986316	1.00946	1.0642	1.01999	1.03598	0.360223
644998890	PREDICTED: 15-hydroxyprostaglandin dehydrogenase [NAD(+)]-like [Nasonia vitripennis]	27.7222	7.88428	4.71	1	1	0.992765	1.00778	1.04293	1.01449	1.00189	0.981713	1.0078	0.997135	0.982889	0.360699
644999121	PREDICTED: ATPase ASNA1 homolog [Nasonia vitripennis]	38.5065	5.46533	22.09	1	6	0.928608	1.01191	1.01925	0.986587	1.01663	0.99207	1.05971	1.02281	1.03671	0.361084
156548722	PREDICTED: palmitoyl-protein thioesterase 1 [Nasonia vitripennis]	34.6314	5.75732	9.21	1	2	1.05879	1.06488	0.95368	1.02578	0.998725	1.01537	0.918418	0.977503	0.952934	0.361361
156542104	PREDICTED: stearoyl-CoA desaturase 5-like [Nasonia vitripennis]	42.0932	7.12256	7.46	2	2	0.812256	1.79209	0.867633	1.15733	0.85494	0.833489	0.802354	0.830261	0.717395	0.362039
156551928	PREDICTED: single-stranded DNA-binding protein, mitochondrial [Nasonia vitripennis]	16.1672	9.39307	12.77	1	2	0.97893	0.96058	1.02054	0.986685	1.00054	1.07377	0.985846	1.02005	1.03382	0.362164
645027556	PREDICTED: pyruvate carboxylase, mitochondrial isoform X1 [Nasonia vitripennis]	132.331	6.84424	56.02	2	49	1.09816	1.01445	0.975084	1.02923	1.04516	0.940744	0.94981	0.978571	0.95078	0.36238
645007770	PREDICTED: N-terminal kinase-like protein isoform X2 [Nasonia vitripennis]	88.3277	6.66846	2.5	2	1	0.897008	1.53007	0.916288	1.11445	0.929443	0.904917	0.866379	0.900246	0.807792	0.362698
644993173	PREDICTED: LOW QUALITY PROTEIN: histone H4-like [Nasonia vitripennis]	11.3744	11.356	50.49	3	1	1.03378	0.987989	1.06999	1.03059	0.987499	1.02787	0.993742	1.00304	0.973269	0.362719
345479090	PREDICTED: band 7 protein AGAP004871 isoform X2 [Nasonia vitripennis]	30.1617	6.37939	9.52	2	2	1.29188	0.919205	0.989994	1.06703	0.971765	0.936958	0.938864	0.949196	0.88957	0.362814
645006119	PREDICTED: pyrroline-5-carboxylate reductase [Nasonia vitripennis]	29.9725	7.73779	11.7	1	4	0.982009	0.973573	1.01257	0.989384	0.979614	1.03528	1.01522	1.01004	1.02088	0.362866
219879810	RNA polymerase II subunit 7 [Nasonia vitripennis]	19.1458	5.77002	15.03	1	2	1.06547	1.0479	0.972044	1.02847	1.04075	0.979068	0.938459	0.986091	0.958795	0.36287
289177129	cytochrome P450 4AB14 precursor [Nasonia vitripennis]	58.9954	8.11865	9.23	11	5	1.0191	1.12876	0.965397	1.03775	0.956651	0.993868	1.00755	0.986022	0.950151	0.3629
645019738	PREDICTED: NAD kinase 2, mitochondrial [Nasonia vitripennis]	46.6282	9.02686	4.14	1	1	1.40451	0.95234	0.962004	1.10628	1.08533	0.922863	0.775739	0.927976	0.838823	0.363119
345487208	PREDICTED: protein kinase C, brain isozyme isoform X3 [Nasonia vitripennis]	76.4463	7.40088	13.11	5	6	1.07098	0.972218	0.996915	1.01337	0.950537	0.961943	1.01679	0.976424	0.963542	0.363216
345480432	PREDICTED: DNA-directed RNA polymerase I subunit RPA49 [Nasonia vitripennis]	53.6817	8.00146	6.4	1	3	0.939855	1.03993	1.01043	0.996737	0.97441	1.0442	1.16795	1.06219	1.06566	0.363639
156545127	PREDICTED: protein FAM136A [Nasonia vitripennis]	16.4297	6.72705	17.61	1	2	1.4214	0.8584	0.957876	1.07922	0.999165	0.89087	0.781417	0.890484	0.825115	0.364185
645011134	PREDICTED: 60S ribosomal protein L38 [Nasonia vitripennis]	8.85307	10.2573	26.67	1	2	0.956174	1.05581	1.0154	1.00913	1.00927	1.04269	1.0891	1.04702	1.03755	0.364263
156546657	PREDICTED: probable trans-2-enoyl-CoA reductase, mitochondrial [Nasonia vitripennis]	40.5311	9.0415	35.05	1	8	0.995998	0.995708	1.02589	1.00587	0.979457	1.01133	0.983327	0.991371	0.985588	0.364463
645007576	PREDICTED: SUMO-conjugating enzyme UBC9 isoform X2 [Nasonia vitripennis]	17.4037	8.67529	28.1	2	3	0.897797	0.991636	0.964618	0.95135	0.952673	1.15435	0.964753	1.02393	1.07629	0.364553
345487116	PREDICTED: dolichyl-diphosphooligosaccharide--protein glycosyltransferase subunit 2 [Nasonia vitripennis]	71.3432	9.29053	28.15	1	15	0.904978	1.05884	0.969872	0.977895	0.992404	1.05016	1.03807	1.02688	1.05009	0.364645
156544986	PREDICTED: clathrin heavy chain [Nasonia vitripennis]	192.076	5.87158	37.8	1	52	1.02714	1.00507	1.00039	1.01087	0.997242	1.00293	1.00597	1.00205	0.991274	0.364781
156549881	PREDICTED: 60S ribosomal protein L12 [Nasonia vitripennis]	17.8045	9.0708	32.73	1	6	0.941352	1.01401	1.00426	0.986538	0.995858	0.998377	1.0605	1.01824	1.03214	0.365186
156551936	PREDICTED: trans-1,2-dihydrobenzene-1,2-diol dehydrogenase-like [Nasonia vitripennis]	36.4308	6.60986	17.12	1	6	0.855183	1.02856	1.00263	0.962124	0.949267	1.09083	1.05679	1.0323	1.07294	0.3655
644991620	PREDICTED: RNA-binding protein squid-like isoform X3 [Nasonia vitripennis]	34.5588	8.54346	29.03	3	9	0.866592	1.08057	0.944726	0.963964	0.984169	1.07854	1.03785	1.03352	1.07216	0.365624
345483492	PREDICTED: trithorax group protein osa [Nasonia vitripennis]	131.347	6.53662	2.29	1	2	1.00611	0.969801	0.959856	0.978589	1.0324	0.98491	0.983666	1.00033	1.02221	0.365767
645000051	PREDICTED: uncharacterized protein LOC100124162 [Nasonia vitripennis]	38.5011	5.77002	16.94	1	4	1.10991	1.04736	1.01405	1.0571	1.1175	0.970152	0.703931	0.930527	0.880262	0.365901
644999230	PREDICTED: mitotic checkpoint protein BUB3 [Nasonia vitripennis]	36.5382	7.10791	10.43	1	2	0.927799	0.953229	1.05667	0.979232	0.992389	1.04902	1.02682	1.02274	1.04443	0.365949
645036031	PREDICTED: translocation protein SEC62 [Nasonia vitripennis]	44.8792	8.80713	3.1	1	1	1.07034	1.13269	1.07825	1.09376	1.12062	0.644306	1.05643	0.940454	0.859835	0.365998
289177154	cytochrome P450 4G44 [Nasonia vitripennis]	63.6349	6.68311	34.96	1	15	0.964201	1.04591	0.934068	0.981394	1.11256	0.98565	1.0042	1.03414	1.05374	0.366097
645024243	PREDICTED: ribose-phosphate pyrophosphokinase 1-like [Nasonia vitripennis]	37.9286	8.01611	13.58	1	1	0.78346	1.1232	0.932953	0.946536	1.09219	1.05445	1.00321	1.04995	1.10925	0.366452
156547295	PREDICTED: vesicle transport protein GOT1B [Nasonia vitripennis]	15.4034	10.3745	10.71	1	1	1.33887	0.909886	0.999956	1.0829	0.8876	0.954189	0.996847	0.946212	0.873774	0.366675
645020339	PREDICTED: hypoxia up-regulated protein 1 isoform X2 [Nasonia vitripennis]	104.504	5.17334	24.65	3	19	0.940605	1.05594	0.95157	0.982703	0.999609	1.04342	1.02362	1.02222	1.04021	0.366893
645014518	PREDICTED: RING finger protein nhl-1 isoform X2 [Nasonia vitripennis]	141	7.10791	3.42	2	4	1.05246	0.991599	0.960933	1.00166	0.937971	1.00358	0.962987	0.96818	0.966572	0.367637
156544940	PREDICTED: small ubiquitin-related modifier-like [Nasonia vitripennis]	11.6806	4.94482	41.18	1	5	0.849394	1.05163	0.970847	0.957291	1.01321	1.07181	0.982594	1.02254	1.06816	0.367869
645006784	PREDICTED: protein TBRG4 isoform X2 [Nasonia vitripennis]	62.9384	8.85107	12.16	2	6	0.90165	1.07634	0.915613	0.964536	0.981786	1.04139	1.05317	1.02545	1.06315	0.369175
645003608	PREDICTED: cullin-1 [Nasonia vitripennis]	89.7461	8.52881	11.37	1	8	0.907059	1.00759	1.01911	0.977919	1.00559	1.01266	1.02475	1.01433	1.03724	0.36925
644992878	PREDICTED: adenylate kinase isoenzyme 1 [Nasonia vitripennis]	21.1891	5.75732	70.83	1	12	0.983927	0.922467	1.03849	0.981627	1.02514	0.966664	1.12782	1.03987	1.05934	0.370653
156546546	PREDICTED: 60S ribosomal protein L13 [Nasonia vitripennis]	25.292	11.0776	42.27	1	10	0.907085	1.02378	0.97946	0.970109	0.981913	1.01506	1.02295	1.00664	1.03766	0.370691
645008930	PREDICTED: hydroxyacylglutathione hydrolase, mitochondrial isoform X2 [Nasonia vitripennis]	28.441	6.50732	17.65	2	4	0.988449	1.01189	0.985864	0.995399	1.03347	1.01168	0.987972	1.01104	1.01571	0.370819
645027308	PREDICTED: N-alpha-acetyltransferase 15, NatA auxiliary subunit [Nasonia vitripennis]	69.6121	7.18115	6.42	1	4	1.03391	0.992864	0.960043	0.995604	1.02253	1.02449	1.00654	1.01785	1.02235	0.371233
156555738	PREDICTED: guanine nucleotide-binding protein-like 3 homolog [Nasonia vitripennis]	64.1713	9.61279	2.62	1	1	1.17637	0.910687	1.0902	1.05909	1.06057	0.871583	0.957215	0.963122	0.909389	0.371564
345483160	PREDICTED: KIF1-binding protein homolog [Nasonia vitripennis]	69.7123	5.26221	4.64	1	3	0.863324	1.01312	1.01065	0.962366	0.941654	1.07988	1.06461	1.02872	1.06894	0.372186
645028947	PREDICTED: serine/arginine repetitive matrix protein 2 isoform X2 [Nasonia vitripennis]	152.878	10.0376	1.42	1	2	0.942013	1.0443	0.97261	0.986309	1.00767	1.03476	1.0113	1.01791	1.03204	0.372205
345485535	PREDICTED: mitochondrial uncoupling protein 2-like [Nasonia vitripennis]	34.0338	9.46631	5	1	1	1.1764	0.994069	0.965614	1.04536	1.01878	0.953638	0.954752	0.975724	0.933383	0.372771
240849643	translocase of outer mitochondrial membrane 7 homolog [Nasonia vitripennis]	6.15625	9.99365	48.15	1	2	0.93057	0.991997	0.966845	0.963137	0.949222	1.20501	0.98218	1.04547	1.08549	0.373674
645003314	PREDICTED: LOW QUALITY PROTEIN: SH3 domain-binding glutamic acid-rich protein homolog [Nasonia vitripennis]	22.5625	4.28467	31.5	1	6	0.930263	1.042	0.960006	0.977422	0.941266	1.0737	1.09117	1.03538	1.0593	0.3737
645011131	PREDICTED: actin-related protein 2/3 complex subunit 1A isoform X5 [Nasonia vitripennis]	40.7541	8.29443	8.56	5	2	0.974848	0.929005	0.976105	0.959986	1.00537	1.15341	0.926234	1.02834	1.0712	0.373941
645016763	PREDICTED: protein phosphatase 1B [Nasonia vitripennis]	41.8468	5.13525	4.24	1	2	1.27879	0.861316	1.11044	1.08352	0.990951	0.881905	0.997162	0.956673	0.882934	0.37412
156553262	PREDICTED: uncharacterized protein LOC100114502 [Nasonia vitripennis]	14.5622	6.53662	7.91	1	1	1.1022	1.14315	0.945492	1.06362	0.908207	0.786216	1.13819	0.944204	0.887731	0.374154
645017391	PREDICTED: synaptosomal-associated protein 25 isoform X2 [Nasonia vitripennis]	23.8253	4.71631	45.79	2	9	1.2257	0.968961	0.934864	1.04317	1.00902	0.936828	0.889521	0.945125	0.906009	0.374328
242117898	growth arrest and DNA-damage-inducible, gamma interacting protein 1 [Nasonia vitripennis]	33.1883	8.49951	5.63	2	1	0.806941	1.0111	0.967862	0.928636	0.923412	1.282	0.966686	1.05737	1.13862	0.374652
345485923	PREDICTED: transmembrane emp24 domain-containing protein eca [Nasonia vitripennis]	25.2109	7.1665	22.12	1	5	0.979755	1.01207	0.945202	0.979009	0.965988	0.961032	0.950634	0.959218	0.979785	0.374739
156551674	PREDICTED: uridine diphosphate glucose pyrophosphatase-like [Nasonia vitripennis]	25.4991	5.26221	9.38	1	2	0.868071	1.05815	0.990604	0.972276	1.01479	1.01194	1.06377	1.03016	1.05954	0.375616
239735565	C1q-like venom protein precursor [Nasonia vitripennis]	16.8687	7.12256	6.25	1	1	1.01414	0.935487	1.02857	0.992732	0.948625	0.933418	0.994094	0.958712	0.965731	0.376022
645033631	PREDICTED: malate synthase-like [Nasonia vitripennis]	61.6874	6.59521	2.41	1	1	0.961402	0.978294	1.02403	0.987908	1.00172	0.986025	1.07534	1.02103	1.03352	0.376022
645002610	PREDICTED: uncharacterized protein LOC100679564 [Nasonia vitripennis]	40.4921	8.54346	7.97	1	2	0.919516	0.981999	1.00905	0.970187	1.00582	1.12128	0.9521	1.0264	1.05794	0.376187
645019826	PREDICTED: catenin delta-2 isoform X10 [Nasonia vitripennis]	104.636	7.03467	1.46	1	1	1.12011	0.975653	1.00134	1.03237	0.959766	1.02865	0.959265	0.98256	0.951751	0.376456
156552708	PREDICTED: prefoldin subunit 2 [Nasonia vitripennis]	17.1179	8.36768	24.16	1	3	0.993249	1.01018	1.02706	1.01016	1.01289	1.02245	1.02669	1.02067	1.01041	0.376605
645019554	PREDICTED: C-terminal-binding protein isoform X5 [Nasonia vitripennis]	40.4468	7.35693	19.89	5	7	0.937527	0.975701	0.987795	0.967008	0.971716	1.05258	0.969711	0.998003	1.03205	0.376965
645014230	PREDICTED: annexin B9-like isoform X2 [Nasonia vitripennis]	42.1218	7.44482	59.84	1	1	0.964791	0.829786	0.86448	0.886352	0.840601	1.49803	0.941211	1.09328	1.23346	0.376978
345479270	PREDICTED: atrophin-1-like [Nasonia vitripennis]	58.1139	6.68311	6.35	1	3	0.641316	1.26489	0.744603	0.883602	0.97778	1.16378	1.10593	1.0825	1.2251	0.377639
644995089	PREDICTED: N-acetylgalactosamine kinase [Nasonia vitripennis]	43.1236	6.40479	3.04	1	1	1.81593	0.914188	0.822894	1.18434	0.86003	0.884372	0.865996	0.870133	0.734701	0.377675
239050560	endonuclease-like venom protein precursor [Nasonia vitripennis]	57.3255	6.85889	20.28	1	10	0.778854	0.825216	1.20215	0.935405	1.06701	1.05955	1.07839	1.06832	1.14209	0.377886
645015940	PREDICTED: kinesin-like protein KIF21A isoform X5 [Nasonia vitripennis]	142.704	7.13721	1.88	6	2	1.31222	0.99476	0.945975	1.08432	1.08153	0.82248	0.941647	0.948551	0.87479	0.377987
645014004	PREDICTED: putative leucine-rich repeat-containing protein DDB_G0290503 [Nasonia vitripennis]	140.712	5.36377	1.55	1	1	0.967652	1.0284	0.97813	0.991395	1.03623	1.02687	0.98429	1.0158	1.02461	0.378012
645011984	PREDICTED: KH domain-containing protein C56G2.1 [Nasonia vitripennis]	64.0517	5.77002	2.25	1	1	0.938321	1.09058	1.10031	1.04307	1.07729	0.903043	0.923105	0.967813	0.927849	0.378292
645003822	PREDICTED: THO complex subunit 5 homolog [Nasonia vitripennis]	76.7236	7.72314	2.82	1	1	1.46472	0.901915	0.962344	1.10966	0.967377	0.856697	0.964779	0.929618	0.83775	0.378721
645034632	PREDICTED: nucleolar protein 6 [Nasonia vitripennis]	131.818	8.27979	6.43	1	5	1.21468	0.965349	1.00895	1.06299	1.01319	1.02504	0.888623	0.97562	0.917805	0.37892
345498399	PREDICTED: ribosome-binding protein 1 isoform X2 [Nasonia vitripennis]	136.279	6.22705	20.07	1	1	0.828261	1.11427	0.842098	0.928211	0.868645	1.19004	1.12736	1.06202	1.14415	0.379143
645028269	PREDICTED: 1-acylglycerophosphocholine O-acyltransferase 1 isoform X2 [Nasonia vitripennis]	50.9381	7.34229	2.7	2	1	1.15968	1.02574	1.05329	1.07957	1.0354	0.716666	1.10972	0.953927	0.883618	0.379476
645024930	PREDICTED: fatty acid synthase-like isoform X1 [Nasonia vitripennis]	181.404	6.62451	9.81	3	14	0.990247	1.045	1.01108	1.01544	1.04415	0.952116	0.943803	0.980025	0.965122	0.379671
283135104	cAMP-dependent protein kinase 1 [Nasonia vitripennis]	40.619	8.55811	24.65	2	7	1.05092	1.0056	1.02216	1.02623	1.01196	1.03098	0.968278	1.00374	0.978081	0.379675
645012819	PREDICTED: casein kinase II subunit beta isoform X3 [Nasonia vitripennis]	25.4903	5.74463	28.51	3	5	0.934612	1.04976	0.971387	0.985251	1.03262	1.07033	0.979728	1.02756	1.04294	0.380211
645032697	PREDICTED: transmembrane emp24 domain-containing protein bai isoform X2 [Nasonia vitripennis]	21.9051	6.3667	28.19	2	6	0.988615	1.04721	0.943484	0.993102	1.0105	1.0311	1.0284	1.02333	1.03044	0.380759
645027202	PREDICTED: myelin expression factor 2 isoform X4 [Nasonia vitripennis]	62.0021	9.05615	18.2	7	9	1.04594	0.985656	0.949101	0.993565	1.02739	0.993949	1.05963	1.02699	1.03364	0.381357
645012107	PREDICTED: L-2-hydroxyglutarate dehydrogenase, mitochondrial [Nasonia vitripennis]	49.4444	8.79248	13.45	1	4	1.22101	0.988484	0.947485	1.05233	1.01528	0.993847	0.858136	0.955755	0.90823	0.38177
645024086	PREDICTED: NEDD8-conjugating enzyme Ubc12 [Nasonia vitripennis]	20.6326	8.27979	14.36	1	3	0.877091	1.124	0.877869	0.959652	1.04552	1.02484	1.05178	1.04071	1.08447	0.381849
345498151	PREDICTED: uncharacterized protein LOC100679879 [Nasonia vitripennis]	15.1112	5.19873	32.12	1	3	0.807202	1.00103	0.967451	0.925227	0.855738	1.21944	1.0562	1.04379	1.12815	0.382581
645037991	PREDICTED: dual specificity mitogen-activated protein kinase kinase 3 [Nasonia vitripennis]	38.3375	6.34131	3.25	1	1	0.897906	1.08726	0.921478	0.968881	1.08143	0.965437	1.06462	1.03716	1.07047	0.382795
289177118	cytochrome P450 6CK7 [Nasonia vitripennis]	61.0004	8.63135	25.48	1	10	0.968269	1.03904	1.12201	1.04311	0.946141	0.978337	1.04755	0.990677	0.949736	0.383071
156551027	PREDICTED: uncharacterized protein LOC100117989 [Nasonia vitripennis]	12.029	8.32373	23.81	1	2	0.95562	1.00665	1.04036	1.00088	1.02189	1.06004	1.00672	1.02955	1.02865	0.38313
156542546	PREDICTED: protein transport protein Sec61 subunit alpha isoform 2 [Nasonia vitripennis]	52.0427	8.23584	10.29	2	5	0.888317	1.05042	0.952921	0.963885	0.964085	1.18999	0.988932	1.04767	1.08692	0.383328
645040721	PREDICTED: protein argonaute-3-like, partial [Nasonia vitripennis]	12.9629	9.71533	33.33	1	3	1.22311	0.978183	0.99849	1.06659	0.977993	0.98893	1.00174	0.989554	0.92777	0.383468
156552274	PREDICTED: 28S ribosomal protein S18a, mitochondrial [Nasonia vitripennis]	17.9055	9.92041	17.72	1	2	1.11628	0.999734	0.996689	1.03757	1.03986	0.964981	0.973085	0.992642	0.956701	0.383702
645028964	PREDICTED: heterogeneous nuclear ribonucleoprotein 27C isoform X3 [Nasonia vitripennis]	41.9388	7.84033	27.42	3	7	1.01824	0.970021	1.01921	1.00249	0.995433	1.03538	1.03968	1.0235	1.02096	0.383715
645031779	PREDICTED: tropomyosin-1 [Nasonia vitripennis]	32.3124	4.80518	66.9	1	22	1.0001	0.982919	1.05535	1.01279	0.96099	0.994416	1.00723	0.987546	0.975075	0.383826
156546432	PREDICTED: ubiquitin carboxyl-terminal hydrolase 16 [Nasonia vitripennis]	102.463	6.17627	4.58	1	4	1.02354	1.00939	0.971593	1.00151	0.953107	0.904679	1.0303	0.962696	0.961245	0.383929
645009151	PREDICTED: major royal jelly protein 5 [Nasonia vitripennis]	41.6007	8.6167	6.38	1	2	0.779933	0.936393	1.10551	0.940613	1.10196	1.10339	0.93599	1.04711	1.11323	0.384655
345497510	PREDICTED: serine/threonine-protein kinase OSR1 isoform X2 [Nasonia vitripennis]	81.462	8.32373	12.79	2	8	0.933838	0.967219	1.01069	0.970581	0.955291	1.02968	1.02153	1.00217	1.03254	0.384848
645000993	PREDICTED: CD109 antigen, partial [Nasonia vitripennis]	170.141	7.02002	7.77	1	12	1.10394	1.0139	0.962482	1.02678	1.01758	0.976337	0.953848	0.982589	0.956965	0.385126
289684233	cuticular protein RR-2 family member 48 precursor [Nasonia vitripennis]	14.0662	6.68311	42.11	1	3	0.887463	1.33465	1.00553	1.07588	0.961709	1.00021	0.854803	0.938907	0.872689	0.385399
645001093	PREDICTED: uncharacterized protein LOC100679888 [Nasonia vitripennis]	45.0734	7.04932	11.9	1	5	0.954633	1.07491	1.03574	1.02176	0.961243	0.966325	1.02043	0.982666	0.961738	0.38548
345482313	PREDICTED: prisilkin-39 isoform X2 [Nasonia vitripennis]	39.527	8.23584	5.93	3	2	0.950847	1.04364	0.905284	0.96659	1.16279	0.969028	0.98478	1.03887	1.07477	0.385628
645021577	PREDICTED: cytosolic Fe-S cluster assembly factor NUBP1 homolog isoform X1 [Nasonia vitripennis]	33.297	5.04639	10.48	1	3	0.960599	0.980087	0.999411	0.980032	0.962663	1.00022	1.11364	1.02551	1.0464	0.385702
645014916	PREDICTED: ankyrin-3-like isoform X1 [Nasonia vitripennis]	158.249	7.35693	8.47	2	6	1.03736	0.98346	1.05011	1.02364	0.990569	1.00083	1.01612	1.00251	0.979351	0.385846
345481794	PREDICTED: putative ribosomal RNA methyltransferase nop2 [Nasonia vitripennis]	89.6101	5.42725	4.2	1	3	0.909082	0.957369	1.02809	0.964847	0.973996	1.05113	0.991094	1.00541	1.04204	0.386093
645012364	PREDICTED: venom acid phosphatase Acph-1-like isoform X2 [Nasonia vitripennis]	43.0987	7.47412	29.51	2	8	0.935502	0.963524	1.02814	0.975723	1.0129	1.03155	0.975829	1.00676	1.03181	0.386308
645033211	PREDICTED: atlastin isoform X1 [Nasonia vitripennis]	74.1478	7.03467	27.01	3	15	0.980203	1.04927	0.990604	1.00669	1.00772	0.968963	0.970732	0.982473	0.97594	0.386439
156553855	PREDICTED: 60S ribosomal protein L22-like [Nasonia vitripennis]	16.7388	9.56885	42.55	1	4	0.769446	1.07001	1.00672	0.948728	0.982423	1.08507	1.05998	1.04249	1.09883	0.38651
644995801	PREDICTED: cathepsin L-like [Nasonia vitripennis]	37.8405	6.18896	34.22	1	9	0.832238	1.08642	0.915836	0.944832	0.966052	1.08237	1.02474	1.02439	1.0842	0.386815
645021117	PREDICTED: fatty acid synthase-like [Nasonia vitripennis]	66.9709	5.77002	44.99	1	7	1.06404	1.00085	0.834011	0.966298	1.06175	1.08419	0.97496	1.0403	1.07658	0.38686
156541322	PREDICTED: guanine nucleotide-binding protein subunit alpha homolog [Nasonia vitripennis]	43.6237	8.86572	5.69	1	1	0.90467	1.06583	0.936018	0.968838	0.952277	1.09295	1.049	1.03141	1.06458	0.386932
345492750	PREDICTED: DNA-directed RNA polymerases I and III subunit RPAC1 [Nasonia vitripennis]	39.4863	7.38623	7.83	1	2	1.04106	0.980593	1.03379	1.01848	0.97733	0.980647	1.02577	0.994582	0.976532	0.387063
645003884	PREDICTED: protein lin-54 homolog isoform X1 [Nasonia vitripennis]	87.6081	8.76318	1.1	1	1	1.07466	0.997714	0.794268	0.955546	0.954324	1.06465	1.13499	1.05132	1.10023	0.387223
156548364	PREDICTED: uncharacterized protein C05D11.1-like [Nasonia vitripennis]	116.099	5.90967	24.34	2	22	0.877049	1.05992	0.977963	0.971643	1.01209	1.03196	1.02556	1.0232	1.05307	0.387383
645009526	PREDICTED: oxysterol-binding protein 1 isoform X3 [Nasonia vitripennis]	90.9344	6.02393	8.01	3	4	0.961192	1.02176	1.04062	1.00786	0.938453	0.990754	1.00373	0.977646	0.970025	0.387431
345493157	PREDICTED: furin-like protease 2, partial [Nasonia vitripennis]	140.559	6.41748	1.01	1	1	1.32249	0.895	1.01609	1.07786	1.00802	0.9422	0.903524	0.951247	0.882531	0.387916
645010802	PREDICTED: guanine deaminase [Nasonia vitripennis]	47.4923	5.87158	4.65	1	1	1.12343	0.927762	1.07085	1.04068	1.02109	0.937763	0.979688	0.979515	0.941228	0.388089
644993482	PREDICTED: uncharacterized protein LOC100114753 [Nasonia vitripennis]	105.677	7.82568	1.76	1	1	1.21048	0.899416	1.07713	1.06234	1.01966	0.876562	0.999132	0.965119	0.908481	0.388413
156542759	PREDICTED: 60S ribosomal protein L34-like [Nasonia vitripennis]	14.1539	11.2974	26.05	1	4	0.958133	0.99456	0.997243	0.983312	1.00663	0.964247	1.10806	1.02631	1.04373	0.388519
645037263	PREDICTED: delta(3,5)-Delta(2,4)-dienoyl-CoA isomerase, mitochondrial [Nasonia vitripennis]	17.72	6.52197	63.41	1	8	1.02192	1.02952	0.963068	1.00484	0.98822	0.988009	0.97638	0.984203	0.979465	0.388746
645032616	PREDICTED: ras-related protein Rap-2a [Nasonia vitripennis]	20.3652	5.2749	11.05	1	2	1.08207	1.01672	0.979209	1.026	1.03973	0.958418	0.964464	0.987537	0.96251	0.388992
345488586	PREDICTED: translation elongation factor 2 [Nasonia vitripennis]	94.3548	6.55127	60.19	1	51	0.907005	1.04961	0.973146	0.976587	0.973892	1.04909	1.0455	1.02283	1.04735	0.389317
156552091	PREDICTED: 26S proteasome non-ATPase regulatory subunit 2 [Nasonia vitripennis]	98.9166	5.46533	31.35	1	21	0.942258	1.04113	0.980043	0.98781	0.995079	1.04695	1.01522	1.01908	1.03166	0.390671
645025759	PREDICTED: protein hu-li tai shao isoform X7 [Nasonia vitripennis]	80.8781	6.88818	31.59	7	17	1.1394	0.961158	0.998173	1.03291	0.979662	0.996668	0.963583	0.979971	0.948748	0.391379
645028440	PREDICTED: uncharacterized protein LOC100113725 [Nasonia vitripennis]	16.0654	8.20654	52.17	1	10	0.941951	1.04399	1.07842	1.02146	1.00842	0.932897	0.988405	0.976575	0.956061	0.391779
645036502	PREDICTED: kinesin-like protein unc-104 isoform X5 [Nasonia vitripennis]	196.511	5.70654	0.75	1	1	1.03119	0.885818	1.00724	0.974747	1.08414	1.06191	0.952653	1.0329	1.05966	0.391804
156538074	PREDICTED: dihydropteridine reductase [Nasonia vitripennis]	25.5221	6.21436	48.95	1	11	0.893769	1.01873	0.975416	0.962637	0.954227	1.03474	1.02774	1.00557	1.0446	0.391983
645015293	PREDICTED: alpha-N-acetylgalactosaminidase [Nasonia vitripennis]	49.8803	5.08447	22.37	1	9	1.07246	0.973307	0.866012	0.970594	1.01182	1.05364	1.02141	1.02896	1.06013	0.392428
644993230	PREDICTED: uncharacterized protein LOC103315525 [Nasonia vitripennis]	8.41631	8.90967	23.29	1	2	0.838691	1.07424	0.891129	0.934688	1.11431	1.15179	0.866626	1.04424	1.11721	0.392706
645003301	PREDICTED: protein bicaudal C isoform X2 [Nasonia vitripennis]	90.9236	8.51416	14.18	2	9	0.966589	0.966936	0.914952	0.949492	1.02905	1.08331	0.899878	1.00408	1.05749	0.393066
645007803	PREDICTED: nucleolin-like [Nasonia vitripennis]	68.9791	4.62744	4.03	1	2	1.04291	0.935163	0.992282	0.990117	1.012	1.02154	1.02694	1.02016	1.03034	0.393233
645034537	PREDICTED: 60S ribosomal protein L18 [Nasonia vitripennis]	21.5552	11.5903	36.7	1	7	0.927736	1.00734	1.0138	0.982958	0.992689	0.996543	1.06168	1.01697	1.0346	0.393396
156549046	PREDICTED: Na(+)/H(+) exchange regulatory cofactor NHE-RF1 [Nasonia vitripennis]	26.013	6.80029	23.87	1	5	0.93639	1.00309	1.00289	0.98079	1.00104	0.982672	1.03702	1.00691	1.02663	0.393515
345490861	PREDICTED: charged multivesicular body protein 7 [Nasonia vitripennis]	49.8153	5.73193	8.41	1	2	1.0169	1.02174	0.998096	1.01224	0.9902	1.02906	0.944213	0.987826	0.975877	0.393537
645012488	PREDICTED: putative N-acetylglucosamine-6-phosphate deacetylase [Nasonia vitripennis]	44.9301	6.52197	6.85	1	2	1.05506	1.11634	0.923104	1.0315	0.932014	0.988982	0.999542	0.973513	0.943784	0.393849
345490777	PREDICTED: sodium/calcium exchanger 2 isoform X2 [Nasonia vitripennis]	96.7848	5.04639	4.45	2	3	1.18472	0.929443	1.02531	1.04649	0.943082	1.02555	0.943829	0.970821	0.927691	0.394104
269969171	putative 60S ribosomal protein L7/L12, partial [Nasonia vitripennis]	15.0163	5.74463	41.01	2	5	0.934189	1.08246	0.869114	0.961921	0.998726	1.04248	1.02893	1.02338	1.06389	0.394229
644999938	PREDICTED: protein FAM98B [Nasonia vitripennis]	57.507	8.63135	5.27	1	2	1.03434	0.994738	1.0473	1.02546	1.02649	1.02316	0.896013	0.981888	0.95751	0.39498
345490570	PREDICTED: lysosomal alpha-mannosidase-like isoform X1 [Nasonia vitripennis]	120.536	6.3667	35.51	1	1	0.885689	1.07833	1.08219	1.0154	0.920241	1.00049	0.926055	0.948929	0.934534	0.39498
345492611	PREDICTED: iron-sulfur cluster assembly 2 homolog, mitochondrial [Nasonia vitripennis]	18.054	6.15088	6.1	1	1	0.979834	1.07836	0.849109	0.969102	1.00667	1.01386	1.09157	1.03737	1.07044	0.39522
156540437	PREDICTED: soluble NSF attachment protein [Nasonia vitripennis]	27.4165	5.65576	46.06	1	8	0.982743	1.0243	0.937589	0.981543	1.00924	1.03529	0.983367	1.0093	1.02828	0.395372
345480485	PREDICTED: 28S ribosomal protein S31, mitochondrial [Nasonia vitripennis]	47.6094	7.62061	10.95	1	4	0.892134	1.1182	0.879344	0.963226	0.97759	1.13066	1.03651	1.04825	1.08827	0.395746
645005566	PREDICTED: 60S ribosomal protein L17 [Nasonia vitripennis]	21.2912	10.1694	42.7	1	9	0.942607	0.947079	1.03813	0.975938	0.961313	1.04003	1.0436	1.01498	1.04	0.396017
156548948	PREDICTED: acetyl-CoA acetyltransferase, cytosolic [Nasonia vitripennis]	41.2006	7.73779	35.79	1	10	1.00478	0.968963	1.0829	1.01888	0.985	0.957721	1.00918	0.983968	0.965733	0.396186
156553038	PREDICTED: CD151 antigen-like [Nasonia vitripennis]	27.1968	7.95752	9.92	1	2	1.89413	0.887017	0.858597	1.21325	1.02732	0.840101	0.781161	0.882861	0.727685	0.396838
156555612	PREDICTED: uncharacterized protein LOC100119070 [Nasonia vitripennis]	24.5638	8.71924	5.43	1	1	1.43377	0.87931	1.03431	1.1158	1.10685	0.874467	0.839284	0.9402	0.842627	0.396908
156549624	PREDICTED: nuclear pore complex protein Nup85 [Nasonia vitripennis]	73.5003	6.31592	6.36	1	3	0.948725	0.967109	0.994414	0.970082	0.998191	1.0745	0.948386	1.00703	1.03808	0.39715
289177104	carboxylesterase clade E, member 11 precursor [Nasonia vitripennis]	62.843	7.03467	31.43	1	12	0.991342	1.11278	0.97908	1.02773	0.963483	0.963864	1.0225	0.983281	0.956748	0.397433
345487659	PREDICTED: uncharacterized protein LOC100121483 isoform X11 [Nasonia vitripennis]	94.9945	9.21729	11	11	9	1.05785	0.933616	1.06525	1.01891	1.01441	0.944957	0.962437	0.973933	0.955861	0.397525
644994644	PREDICTED: pancreatic lipase-related protein 2-like [Nasonia vitripennis]	40.3919	6.7417	10.06	1	3	0.798465	0.89762	1.13311	0.943066	1.04053	0.972833	1.12331	1.04556	1.10868	0.397786
644993024	PREDICTED: prominin-like protein isoform X4 [Nasonia vitripennis]	101.175	6.69775	1.67	4	1	1.13274	0.954121	1.01439	1.03375	0.965182	0.995034	0.98998	0.983399	0.951291	0.398054
156547223	PREDICTED: ankyrin repeat domain-containing protein 13D [Nasonia vitripennis]	66.353	4.95752	2.06	1	1	1.04454	0.943425	1.10279	1.03025	0.982746	0.967788	1.00477	0.985103	0.956178	0.398202
238859585	Kazal type serine protease inhibitor-like venom protein 1 precursor [Nasonia vitripennis]	7.38949	7.6499	43.08	1	2	0.730944	0.94052	1.13747	0.936313	1.09723	1.02833	1.02258	1.04938	1.12075	0.398721
345479240	PREDICTED: uncharacterized protein LOC100677912 [Nasonia vitripennis]	21.4302	5.63037	7.53	1	1	0.77628	1.80463	0.902513	1.16114	0.920702	0.827413	0.814605	0.85424	0.73569	0.399169
345496453	PREDICTED: paraplegin [Nasonia vitripennis]	88.0733	8.86572	17.62	1	10	1.03322	0.981282	1.0271	1.01387	1.0107	0.968462	1.00328	0.994148	0.98055	0.399462
645020871	PREDICTED: probable small nuclear ribonucleoprotein Sm D1 [Nasonia vitripennis]	13.5064	11.4438	26.83	1	3	1.11394	0.914786	1.09009	1.03961	0.929128	0.934731	1.047	0.970285	0.933319	0.399554
156549579	PREDICTED: calpain-B-like isoform X5 [Nasonia vitripennis]	85.0726	4.94482	27.15	5	16	1.02865	1.00095	1.0061	1.0119	0.988231	1.02565	0.969192	0.994358	0.982664	0.39987
345484655	PREDICTED: nuclear factor NF-kappa-B p100 subunit isoform X2 [Nasonia vitripennis]	104.083	6.13818	0.86	2	1	1.01047	0.996594	0.867639	0.958235	0.993395	0.936123	1.22863	1.05271	1.0986	0.39991
156540298	PREDICTED: protein transport protein Sec61 subunit beta [Nasonia vitripennis]	9.92817	11.7954	14.74	1	1	0.854205	1.09512	0.790323	0.913217	0.93448	1.29765	0.937074	1.0564	1.15679	0.400078
283135234	NADH dehydrogenase [ubiquinone] 1 alpha subcomplex subunit 6 [Nasonia vitripennis]	14.6037	9.77393	26.02	3	3	1.01378	0.942431	1.13362	1.02994	0.970127	0.965536	0.994883	0.976849	0.948451	0.400724
345491717	PREDICTED: lymphocyte antigen 6C2 [Nasonia vitripennis]	14.1137	6.85889	6.92	1	1	1.14098	0.978428	0.988562	1.03599	0.934798	1.03423	0.96959	0.97954	0.94551	0.400829
645000927	PREDICTED: AP-1 complex subunit gamma-1 isoform X2 [Nasonia vitripennis]	96.3442	6.68311	5.9	2	4	1.14306	0.919455	1.02805	1.03019	0.997973	0.906937	0.986782	0.963897	0.935654	0.401135
645024837	PREDICTED: methionine aminopeptidase 2 isoform X2 [Nasonia vitripennis]	52.0501	6.32861	23.09	2	9	0.992681	1.01396	1.0299	1.01218	0.969696	1.0095	1.00929	0.996163	0.984176	0.401167
645014667	PREDICTED: GTP-binding nuclear protein Ran [Nasonia vitripennis]	24.6306	7.41553	42.33	1	7	0.871409	1.08298	0.922363	0.958917	1.00309	1.11343	0.975286	1.0306	1.07476	0.401469
645028471	PREDICTED: phosphofurin acidic cluster sorting protein 2 [Nasonia vitripennis]	87.5105	7.15186	4.68	1	3	1.25886	0.958521	0.972407	1.06326	1.02373	0.973048	0.899666	0.965483	0.908038	0.401568
645012605	PREDICTED: adaptor-related protein complex 2, alpha 2 subunit isoform X1 [Nasonia vitripennis]	105.127	7.04932	22.9	1	18	1.09794	0.986835	1.00546	1.03008	1.0146	0.996898	0.977602	0.996366	0.967272	0.401812
645020791	PREDICTED: growth hormone-inducible transmembrane protein-like [Nasonia vitripennis]	35.5467	9.74463	4.14	1	1	0.926179	1.05292	0.977066	0.985389	1.01377	1.01802	1.02847	1.02008	1.03521	0.402427
645022304	PREDICTED: ribose-phosphate pyrophosphokinase 1 isoform X4 [Nasonia vitripennis]	40.6168	7.89893	47.85	4	12	0.954691	1.04897	1.03418	1.01261	0.995855	0.977253	0.98104	0.984716	0.97245	0.402479
645001778	PREDICTED: 40S ribosomal protein S26 [Nasonia vitripennis]	21.0872	10.6235	17.13	1	3	0.946342	0.984115	1.01992	0.98346	0.9772	0.996591	1.09469	1.02283	1.04003	0.40283
644997837	PREDICTED: glucose-induced degradation protein 8 homolog [Nasonia vitripennis]	26.5595	5.30029	24.78	1	4	1.10395	1.06201	0.937275	1.03441	0.956849	1.01676	0.98104	0.984882	0.952118	0.402878
645032350	PREDICTED: uncharacterized protein LOC100121014 [Nasonia vitripennis]	29.5727	5.18604	37.45	1	9	0.843455	0.965892	1.07479	0.961378	1.00277	0.991622	1.10032	1.03157	1.07301	0.403506
229577228	neural precursor cell expressed, developmentally down-regulated 4 [Nasonia vitripennis]	91.8386	5.41455	2	1	1	1.14664	1.18123	0.856467	1.06145	0.894425	0.948304	1.03272	0.958485	0.902999	0.40443
345483594	PREDICTED: uncharacterized protein LOC100679906 isoform X2 [Nasonia vitripennis]	23.3244	4.65283	5.83	2	1	0.997352	1.01552	0.95345	0.988775	0.972484	1.01844	1.06793	1.01962	1.03119	0.404851
644992184	PREDICTED: alanine aminotransferase 2 [Nasonia vitripennis]	61.1342	8.98291	42.52	1	21	0.983007	0.953358	1.0333	0.989889	1.03714	0.984553	1.02709	1.01626	1.02664	0.405018
645017596	PREDICTED: thioredoxin, mitochondrial [Nasonia vitripennis]	15.7143	6.52197	37.32	1	4	0.933091	1.07628	1.02682	1.01206	0.931313	0.996721	0.979018	0.969017	0.957467	0.405227
645027448	PREDICTED: dynein heavy chain, cytoplasmic-like [Nasonia vitripennis]	124.752	7.00537	13.1	1	11	1.03703	1.01955	0.981721	1.01277	1.00578	1.0133	0.939955	0.986343	0.973908	0.405484
238908532	venom protein K precursor [Nasonia vitripennis]	12.9174	4.99561	35.34	1	4	0.682808	0.850311	1.22497	0.919365	1.02107	1.08631	1.10269	1.07002	1.16387	0.405546
645041038	PREDICTED: proteasomal ubiquitin receptor ADRM1 homolog, partial [Nasonia vitripennis]	12.7374	8.92432	10.48	1	1	0.936547	1.12335	0.748331	0.936075	1.19819	0.986978	0.982912	1.05603	1.12814	0.406779
345494757	PREDICTED: uncharacterized protein LOC100679631 [Nasonia vitripennis]	27.8214	6.53662	26.47	1	3	1.05501	0.88901	1.19985	1.04796	1.05426	0.879943	0.920435	0.951547	0.908002	0.406832
345481204	PREDICTED: LOW QUALITY PROTEIN: xaa-Pro aminopeptidase 1 [Nasonia vitripennis]	83.4433	6.80029	3.15	1	2	1.04615	0.966757	1.06743	1.02678	1.0504	0.974632	0.920751	0.981928	0.95632	0.407462
645018996	PREDICTED: vesicular integral-membrane protein VIP36 [Nasonia vitripennis]	37.0534	7.06396	19.33	1	5	1.05291	1.10299	0.949842	1.03525	0.993286	0.989056	0.998129	0.993491	0.959666	0.407485
645031828	PREDICTED: probable multidrug resistance-associated protein lethal(2)03659 isoform X2 [Nasonia vitripennis]	150.386	7.95752	2.01	2	2	1.07411	0.928244	0.985014	0.995788	1.01545	1.0326	1.06319	1.03708	1.04147	0.407773
345488130	PREDICTED: anamorsin homolog [Nasonia vitripennis]	34.9135	5.38916	13.29	1	3	0.895451	1.06102	1.01901	0.991827	0.996224	1.07218	1.0594	1.0426	1.05119	0.407836
644997268	PREDICTED: titin isoform X2 [Nasonia vitripennis]	266.792	8.11865	31.44	5	64	1.00302	1.00005	0.966729	0.989932	1.03255	1.01356	0.978154	1.00809	1.01834	0.409626
156553984	PREDICTED: glycerol kinase-like [Nasonia vitripennis]	61.2547	5.0083	6.69	1	2	1.16213	0.905921	1.06602	1.04469	0.992362	0.981014	0.95198	0.975119	0.933405	0.410008
156536919	PREDICTED: 60S ribosomal protein L4 [Nasonia vitripennis]	48.275	11.4731	51.51	1	21	0.925369	0.990536	1.04767	0.987859	0.991045	1.02303	1.06203	1.02537	1.03797	0.410574
645039407	PREDICTED: protein LSM14 homolog B-like isoform X3 [Nasonia vitripennis]	72.7052	9.72998	24.51	3	1	1.22792	1.03899	0.899603	1.0555	0.977802	0.999637	0.91885	0.965429	0.914662	0.41068
645000844	PREDICTED: myosin-VIIa [Nasonia vitripennis]	250.898	8.98291	2.4	3	3	1.0021	0.944136	0.810225	0.91882	1.05479	0.862198	1.0888	1.00193	1.09045	0.41081
156555396	PREDICTED: retinoid-inducible serine carboxypeptidase-like [Nasonia vitripennis]	49.47	6.59521	5	1	2	1.18273	0.937395	1.03242	1.05085	1.03674	0.966037	0.937279	0.980018	0.932598	0.411298
645002959	PREDICTED: 26S protease regulatory subunit 6A-B [Nasonia vitripennis]	47.7167	5.18604	51.17	3	15	0.959151	1.02432	0.979424	0.987632	0.979976	1.01972	1.03115	1.01028	1.02293	0.411446
229606075	proteasome p44.5 subunit [Nasonia vitripennis]	47.3728	6.30322	38.06	1	14	0.924301	1.04259	0.982063	0.982986	1.00771	1.0163	1.01922	1.01441	1.03197	0.411724
345494300	PREDICTED: failed axon connections isoform X2 [Nasonia vitripennis]	47.1804	5.42725	36.43	3	12	1.08796	0.963246	1.01726	1.02282	0.992136	0.99568	0.980816	0.989544	0.967465	0.412156
156549813	PREDICTED: uncharacterized protein LOC100122957 [Nasonia vitripennis]	37.7055	9.42236	19.14	1	4	1.06102	1.06281	0.977466	1.03377	0.982772	0.994702	1.0352	1.00422	0.971422	0.412351
645016623	PREDICTED: uncharacterized protein LOC100122903 isoform X3 [Nasonia vitripennis]	59.4156	7.21045	8.74	3	3	0.951044	0.973382	1.03786	0.987429	1.0086	1.06168	0.986124	1.0188	1.03177	0.412593
345494054	PREDICTED: interaptin-like [Nasonia vitripennis]	211.622	4.60205	7.24	1	11	0.938596	1.07205	0.932635	0.981093	0.994288	1.039	1.04156	1.02495	1.0447	0.412809
156552609	PREDICTED: 40S ribosomal protein S17 [Nasonia vitripennis]	15.2803	9.81787	64.12	1	7	0.974005	1.00701	1.04345	1.00816	0.938587	1.01135	0.993244	0.98106	0.973122	0.412826
156552406	PREDICTED: transaldolase isoform X2 [Nasonia vitripennis]	36.9803	7.32764	53.92	2	16	0.953308	1.01834	1.00604	0.992563	1.01083	1.01559	1.00638	1.01093	1.01851	0.412916
345482574	PREDICTED: aminopeptidase N isoform X1 [Nasonia vitripennis]	114.514	7.79639	16.3	2	13	1.08464	0.943129	1.01796	1.01524	0.972034	0.997516	0.960251	0.9766	0.961939	0.412929
645011543	PREDICTED: malate dehydrogenase, mitochondrial [Nasonia vitripennis]	35.8903	9.49561	80.65	1	22	1.05029	0.920717	1.12519	1.03207	0.983697	0.938835	1.0022	0.97491	0.94462	0.413006
156541876	PREDICTED: uncharacterized protein LOC100115890 [Nasonia vitripennis]	46.5034	5.69385	21.71	1	5	0.92582	1.00037	1.17613	1.03411	0.925385	1.02371	0.932327	0.960474	0.928797	0.413065
156537099	PREDICTED: N-acetylgalactosaminyltransferase 7 [Nasonia vitripennis]	67.1158	7.35693	7.38	1	3	1.07923	1.02517	1.06258	1.05566	1.0022	0.804138	1.11092	0.972419	0.92115	0.413102
345483318	PREDICTED: peptidyl-prolyl cis-trans isomerase B-like [Nasonia vitripennis]	25.6811	5.88428	17.09	1	4	0.821552	1.03162	0.982635	0.945269	0.891399	1.05635	1.16824	1.03866	1.0988	0.413454
645016887	PREDICTED: protein transport protein Sec23A isoform X2 [Nasonia vitripennis]	85.6161	7.06396	18.41	2	11	1.06411	0.978143	0.999347	1.01387	0.993851	0.998527	0.976148	0.989509	0.975975	0.413865
156542074	PREDICTED: uncharacterized protein LOC100118196 [Nasonia vitripennis]	50.3326	5.43994	14.91	1	4	1.026	0.977411	0.935963	0.979791	1.06643	0.966793	1.01216	1.01513	1.03606	0.414104
345494751	PREDICTED: 28S ribosomal protein S9, mitochondrial [Nasonia vitripennis]	46.2946	9.27588	6.23	1	2	0.92717	1.01997	0.912259	0.953133	0.891022	1.10103	1.06759	1.01988	1.07003	0.414272
156553141	PREDICTED: F-box/SPRY domain-containing protein 1 [Nasonia vitripennis]	30.2289	6.82959	6.64	1	1	0.885626	0.899645	1.55878	1.11468	0.824649	0.86659	1.02459	0.905275	0.812136	0.414589
645021038	PREDICTED: spermidine synthase [Nasonia vitripennis]	32.2253	5.66846	22.57	1	6	1.0201	1.01207	1.00802	1.0134	1.0224	0.948286	1.00715	0.992611	0.979489	0.41488
645034272	PREDICTED: ovalbumin-related protein X isoform X12 [Nasonia vitripennis]	43.9484	5.10986	50.25	11	1	0.946922	1.0948	0.86491	0.968879	1.07501	1.04756	0.982178	1.03492	1.06816	0.414976
156536997	PREDICTED: histone H2A [Nasonia vitripennis]	13.3465	10.6968	41.94	6	3	1.18971	0.727556	1.34051	1.08592	0.833858	0.93986	0.969162	0.914293	0.84195	0.415011
645000193	PREDICTED: mitochondrial fission 1 protein isoform X3 [Nasonia vitripennis]	16.8649	8.35303	40.67	3	5	1.04937	0.951927	1.04426	1.01519	1.00533	0.954565	0.990209	0.983367	0.968655	0.415394
229577378	nucleosome assembly protein 1-like isoform 2 [Nasonia vitripennis]	43.1768	4.60205	29.57	2	10	0.867363	1.06486	0.999796	0.97734	1.02087	1.04378	1.02649	1.03038	1.05427	0.41599
289684237	cuticular protein RR-1 family member 34 precursor [Nasonia vitripennis]	11.6227	4.84326	41.9	1	3	1.12921	0.996341	0.998366	1.0413	0.987267	1.05347	0.928694	0.989809	0.950547	0.416199
345493710	PREDICTED: uncharacterized protein LOC100679693 [Nasonia vitripennis]	12.1433	5.0083	26.85	1	2	1.13751	0.947504	0.742148	0.942386	0.924093	1.07557	1.21055	1.07007	1.13549	0.416343
345488750	PREDICTED: uncharacterized protein LOC100114012 [Nasonia vitripennis]	39.1221	8.6167	3.38	1	1	1.30598	0.819937	1.11587	1.08059	0.873905	0.958422	1.01057	0.947632	0.876954	0.416619
345491892	PREDICTED: uncharacterized protein LOC100115149 [Nasonia vitripennis]	31.4097	7.50342	59.79	1	13	0.987811	1.02536	0.958438	0.990536	1.03378	0.994365	1.00494	1.01103	1.02069	0.417096
645032277	PREDICTED: metallo-beta-lactamase domain-containing protein 1 [Nasonia vitripennis]	24.4893	4.76709	19.63	1	3	0.981462	0.876159	1.04062	0.966081	1.01228	0.979046	1.04808	1.01314	1.04871	0.417211
644994864	PREDICTED: GPI transamidase component PIG-S [Nasonia vitripennis]	62.4651	6.29053	7.71	1	3	1.1113	0.931957	0.987994	1.01042	0.950949	0.994848	0.933762	0.959853	0.949956	0.417674
645013325	PREDICTED: putative uncharacterized protein DDB_G0271606 [Nasonia vitripennis]	58.4057	7.50342	3.73	1	1	1.7683	1.62007	0.416302	1.26822	1.37783	0.614872	0.403473	0.798725	0.629799	0.41799
229577257	ADP-ribosylation factor-like [Nasonia vitripennis]	20.3046	7.37158	38.89	3	2	0.848845	1.08102	0.977112	0.968994	1.00557	1.05362	1.03338	1.03086	1.06385	0.417996
644993801	PREDICTED: 40S ribosomal protein S13, partial [Nasonia vitripennis]	11.3573	10.4331	44.9	1	4	1.02288	0.992874	1.05505	1.0236	0.946745	1.01022	1.0302	0.995722	0.972761	0.418002
645017482	PREDICTED: epididymal secretory protein E1-like [Nasonia vitripennis]	16.3354	8.63135	43.33	1	5	0.890702	0.990578	1.04655	0.975943	0.961026	1.04088	1.08252	1.02814	1.05349	0.418018
345490143	PREDICTED: uncharacterized protein LOC100114520 [Nasonia vitripennis]	162.653	7.07861	12.47	1	13	0.985285	1.0856	0.981919	1.0176	0.946934	1.04025	0.937988	0.975059	0.958192	0.418213
645013304	PREDICTED: altered inheritance of mitochondria protein 3-like isoform X2 [Nasonia vitripennis]	59.3597	7.89893	6.37	2	3	1.60026	0.870347	0.892938	1.12118	1.06932	0.862658	0.73102	0.887667	0.791724	0.418356
645002582	PREDICTED: synaptotagmin 1 isoform X4 [Nasonia vitripennis]	49.4327	7.91357	35.21	4	12	1.01322	1.01075	1.00954	1.01117	0.991209	1.02664	0.972942	0.996929	0.985919	0.418421
345480212	PREDICTED: COP9 signalosome complex subunit 4 [Nasonia vitripennis]	47.2002	5.5415	19.17	1	6	0.977347	1.0288	0.943566	0.983239	1.00105	1.02053	0.99779	1.00646	1.02361	0.418673
644999199	PREDICTED: tight junction protein ZO-1 isoform X1 [Nasonia vitripennis]	171.419	7.82568	0.77	1	1	1.35764	1.07405	0.846576	1.09276	1.10012	0.907246	0.809887	0.939085	0.859374	0.418804
645023917	PREDICTED: MORN repeat-containing protein 4 [Nasonia vitripennis]	15.2784	6.78564	26.28	1	2	1.08041	1.00403	1.05399	1.04614	0.93932	1.11387	0.894886	0.982691	0.939346	0.418889
645000545	PREDICTED: vanin-like protein 1 [Nasonia vitripennis]	48.8683	5.88428	3.44	1	1	1.01307	0.965793	1.09442	1.02443	1.00158	0.952721	1.00729	0.987196	0.963655	0.418921
345497796	PREDICTED: muscle M-line assembly protein unc-89 [Nasonia vitripennis]	55.6516	6.23975	22.29	1	11	1.00079	1.04672	0.974798	1.00743	1.01914	0.946244	0.976387	0.980591	0.973355	0.418951
645023426	PREDICTED: heat shock 70 kDa protein cognate 5 [Nasonia vitripennis]	75.1337	6.32861	43.81	1	26	0.973887	1.0266	0.965543	0.988678	1.0005	1.02822	0.995636	1.00812	1.01966	0.419788
645035829	PREDICTED: superoxide dismutase [Cu-Zn] 4A-like isoform X2 [Nasonia vitripennis]	21.6982	6.40479	22.86	2	4	1.25421	0.926988	0.99717	1.05946	1.03935	0.955555	0.891683	0.962198	0.9082	0.419789
645021848	PREDICTED: uncharacterized protein LOC103315300 [Nasonia vitripennis]	23.1865	8.35303	5.94	1	1	2.41403	0.73676	0.727203	1.29266	0.809885	0.73365	0.823591	0.789042	0.6104	0.420378
156554120	PREDICTED: pseudouridine-5'-monophosphatase-like isoform X2 [Nasonia vitripennis]	25.8071	6.37939	44.35	1	3	1.06927	0.950998	1.09754	1.03927	0.996287	0.894597	1.05342	0.981436	0.944351	0.421183
156551734	PREDICTED: polymerase delta-interacting protein 2 [Nasonia vitripennis]	39.0809	8.82178	2.96	1	1	1.02649	0.786939	1.0745	0.962643	1.03434	1.07873	1.01854	1.04387	1.08438	0.421336
645004555	PREDICTED: phytanoyl-CoA dioxygenase, peroxisomal-like [Nasonia vitripennis]	33.0909	7.13721	16.96	1	4	1.02603	0.922242	1.04065	0.996307	0.996809	1.04084	1.06465	1.0341	1.03793	0.421531
345498285	PREDICTED: probable phytanoyl-CoA dioxygenase [Nasonia vitripennis]	39.7741	9.02686	31.59	1	10	0.881887	1.00189	1.04797	0.977249	1.08781	0.993368	1.00537	1.02885	1.0528	0.421862
156544518	PREDICTED: bis(5'-nucleosyl)-tetraphosphatase [asymmetrical] [Nasonia vitripennis]	16.8355	6.53662	31.25	1	3	0.796801	0.980151	1.10252	0.959824	0.951627	1.16272	1.05391	1.05609	1.10029	0.422074
645000275	PREDICTED: GPI transamidase component PIG-T [Nasonia vitripennis]	64.2312	8.55811	5.98	1	2	1.20258	0.927997	1.02057	1.05038	1.03365	0.970735	0.911082	0.971822	0.925209	0.422827
156553809	PREDICTED: ras-related protein Rab-35 [Nasonia vitripennis]	23.0999	9.12939	11.88	1	1	0.867998	1.12335	0.805037	0.932128	0.847567	1.14861	1.18834	1.06151	1.1388	0.422892
345488032	PREDICTED: translin-associated protein X [Nasonia vitripennis]	37.4451	6.65381	5.52	1	2	0.883654	1.06347	0.98824	0.978454	1.03482	1.00639	1.03589	1.0257	1.04828	0.423306
345485197	PREDICTED: far upstream element-binding protein 3 isoform X2 [Nasonia vitripennis]	79.2773	6.68311	12.92	2	9	0.963818	1.01743	0.981758	0.987669	0.97085	1.03559	1.02454	1.01033	1.02294	0.423714
156542913	PREDICTED: chitinase-3-like protein 2 [Nasonia vitripennis]	52.7883	7.40088	12.8	1	5	1.17778	0.900461	1.0748	1.05101	0.964436	0.98828	0.983766	0.978827	0.931319	0.424576
645021148	PREDICTED: tumor protein D54 isoform X3 [Nasonia vitripennis]	24.1132	7.40088	50.91	3	9	0.928353	1.03051	0.999186	0.986016	1.0029	1.02643	1.01126	1.01353	1.02791	0.424788
156545511	PREDICTED: SUMO-activating enzyme subunit 1 [Nasonia vitripennis]	37.4954	6.56592	27.88	1	8	0.857559	1.0818	0.957008	0.965455	0.994905	1.10189	0.996371	1.03105	1.06795	0.42492
645015241	PREDICTED: ras-related protein Ral-a isoform X5 [Nasonia vitripennis]	22.8897	8.32373	15.42	5	3	1.00396	1.02194	1.02661	1.0175	1.02303	0.950382	1.01514	0.996185	0.97905	0.425115
345485417	PREDICTED: eukaryotic peptide chain release factor GTP-binding subunit ERF3A isoform X2 [Nasonia vitripennis]	60.3347	5.36377	28.23	2	11	0.93694	1.06656	0.956459	0.986654	1.04267	1.01094	1.01678	1.02346	1.03731	0.425306
645029966	PREDICTED: glycogen synthase kinase-3 beta isoform X2 [Nasonia vitripennis]	51.3293	8.41162	27.8	4	10	1.03394	1.03379	0.97533	1.01435	1.00894	0.978539	0.998503	0.995328	0.981246	0.425309
289177014	glutathione S-transferase S8 [Nasonia vitripennis]	22.7219	6.25244	48.51	1	7	0.950674	0.99861	1.01436	0.98788	0.980404	1.00322	1.06297	1.01553	1.02799	0.425417
644994878	PREDICTED: nitrilase homolog 1 isoform X2 [Nasonia vitripennis]	34.2985	8.04541	24.92	2	5	1.08587	0.988079	0.993944	1.02263	1.02445	0.971453	0.976637	0.990848	0.968919	0.425732
288856271	NADH dehydrogenase [ubiquinone] 1 beta subcomplex subunit 7 [Nasonia vitripennis]	15.1636	8.47021	20.47	1	2	0.999054	0.98011	1.02387	1.00101	1.01821	0.988396	0.879266	0.961956	0.960983	0.425757
156555390	PREDICTED: probable asparagine--tRNA ligase, mitochondrial [Nasonia vitripennis]	52.9933	7.72314	4.27	1	1	1.13688	0.913627	1.07532	1.04194	0.941444	1.06132	0.90727	0.97001	0.930965	0.42639
345493175	PREDICTED: uncharacterized protein LOC100679306 isoform X2 [Nasonia vitripennis]	29.7579	5.07178	13.06	2	2	1.06901	1.00393	1.01233	1.02842	0.935896	1.08228	0.919448	0.979207	0.952145	0.426394
645027252	PREDICTED: torso-like protein [Nasonia vitripennis]	39.3485	9.5542	5.26	1	1	1.23396	0.936158	0.998907	1.05634	0.998904	0.899193	1.01255	0.970215	0.918467	0.426621
645007414	PREDICTED: protein FAM151A isoform X2 [Nasonia vitripennis]	32.0669	7.47412	31.42	2	9	0.890505	1.04978	0.987328	0.975872	1.01254	1.08906	0.976954	1.02618	1.05156	0.426722
156545936	PREDICTED: uncharacterized protein LOC100113708 [Nasonia vitripennis]	14.0809	5.31299	55.65	1	5	0.89173	0.973165	1.03593	0.96694	1.05634	0.989453	0.982168	1.00932	1.04383	0.426736
645004658	PREDICTED: arylsulfatase B-like [Nasonia vitripennis]	65.0644	6.90283	8.82	1	3	1.01768	1.00707	1.00369	1.00948	0.963519	1.01916	1.00093	0.994536	0.985197	0.426799
644995588	PREDICTED: 27 kDa hemolymph protein [Nasonia vitripennis]	33.4039	5.57959	27.88	1	9	0.990802	1.01827	1.0584	1.02249	0.974548	1.02456	1.00369	1.00093	0.978916	0.426934
645008504	PREDICTED: elongation factor Tu, mitochondrial [Nasonia vitripennis]	51.5895	8.104	9.31	1	3	1.00481	0.954146	0.993438	0.984131	0.990232	1.03519	0.98543	1.00362	1.0198	0.426947
645005812	PREDICTED: argininosuccinate synthase [Nasonia vitripennis]	48.0347	6.22705	4.68	1	1	1.14404	0.841614	1.22042	1.06869	0.97531	0.865411	1.03254	0.957755	0.896193	0.427076
345490663	PREDICTED: probable cytosolic oligopeptidase A [Nasonia vitripennis]	84.1302	7.44482	12.02	1	7	0.935243	1.01038	1.03697	0.994197	0.990771	1.03455	1.05081	1.02538	1.03136	0.427521
345487899	PREDICTED: keratin, type II cytoskeletal 1 [Nasonia vitripennis]	33.1672	7.15186	8.33	1	3	0.921439	0.937158	1.05326	0.970618	0.966826	0.997604	1.10112	1.02185	1.05278	0.42782
156547112	PREDICTED: endocuticle structural glycoprotein ABD-5 [Nasonia vitripennis]	12.3511	4.58936	46.49	2	5	0.871485	0.800183	1.16963	0.9471	1.13407	0.995123	1.03074	1.05331	1.11214	0.428156
644999372	PREDICTED: disks large 1 tumor suppressor protein-like [Nasonia vitripennis]	40.9427	7.2251	6.18	2	2	0.94437	1.0609	0.951778	0.985682	1.04873	0.999774	1.01514	1.02122	1.03605	0.428197
345491977	PREDICTED: guanylate cyclase soluble subunit beta-1 isoform X1 [Nasonia vitripennis]	68.2386	5.84619	4.49	1	2	1.47178	0.865587	0.952054	1.09648	0.902668	0.941834	0.943596	0.929366	0.847594	0.428289
229576987	eukaryotic translation initiation factor 2A [Nasonia vitripennis]	65.7076	8.96826	7.19	2	4	0.856451	1.10767	0.821084	0.928401	1.03716	1.05442	0.947502	1.01303	1.09115	0.428292
644993199	PREDICTED: importin-9 [Nasonia vitripennis]	95.0977	4.7417	6.61	1	4	1.03304	0.996913	0.931561	0.98717	1.03404	0.980687	1.03952	1.01808	1.03131	0.428574
229577037	tetratricopeptide repeat domain 37 [Nasonia vitripennis]	148.392	7.10791	3.69	1	4	1.03384	1.05541	0.974408	1.02122	1.02166	0.937469	1.01009	0.989738	0.969174	0.428728
156552957	PREDICTED: uncharacterized protein CG10915 [Nasonia vitripennis]	60.447	9.45166	2.14	1	1	0.982954	0.924879	1.00914	0.972326	0.932468	1.13913	1.01679	1.02946	1.05876	0.428735
645033993	PREDICTED: uncharacterized protein LOC100121953 [Nasonia vitripennis]	48.8186	5.8335	16.05	1	5	1.3337	0.935996	0.946651	1.07212	1.01992	0.909493	0.930521	0.953312	0.889187	0.428973
345481840	PREDICTED: probable allantoinase 1 [Nasonia vitripennis]	51.1853	6.78564	14.47	1	6	0.790062	1.01968	1.03291	0.947553	0.927288	1.08784	1.07615	1.03042	1.08746	0.428978
345486152	PREDICTED: transferrin-like [Nasonia vitripennis]	81.8516	6.62451	16.16	1	9	1.05316	0.986815	0.986643	1.00887	1.00223	0.97059	0.99054	0.987785	0.979098	0.429076
156545966	PREDICTED: general odorant-binding protein 69a [Nasonia vitripennis]	15.853	5.22412	8.33	1	1	1.12556	0.684808	1.02187	0.944077	1.10519	1.02257	1.06084	1.06287	1.12582	0.42913
645011262	PREDICTED: 60S ribosomal protein L13a [Nasonia vitripennis]	23.4249	11.063	57.35	1	13	0.869587	1.02073	1.01694	0.969086	0.998823	0.991291	1.06036	1.01682	1.04926	0.429414
645024986	PREDICTED: myosin light chain alkali-like [Nasonia vitripennis]	16.6873	4.76709	62.67	1	9	1.11071	0.918524	1.0817	1.03698	0.875443	0.987984	1.04327	0.9689	0.93435	0.429666
645004155	PREDICTED: PITH domain-containing protein GA19395 [Nasonia vitripennis]	28.3592	5.73193	16	1	2	1.02125	1.06007	0.987626	1.02298	0.986377	1.05101	0.913117	0.9835	0.961405	0.42978
288869487	cuticular protein analogous to peritrophins 3-A2 precursor [Nasonia vitripennis]	26.5323	4.84326	5.86	1	1	1.19737	1.01909	0.937077	1.05118	1.01243	0.88768	1.0215	0.97387	0.926455	0.429911
645010142	PREDICTED: venom metalloproteinase 3-like [Nasonia vitripennis]	34.5837	9.0708	36.84	1	11	0.974842	1.0181	0.961867	0.984938	1.02076	1.01298	0.977729	1.00382	1.01917	0.430287
645009002	PREDICTED: endoribonuclease Dicer [Nasonia vitripennis]	178.749	6.31592	1.09	1	1	1.25188	0.867817	1.08511	1.06827	0.981113	0.867147	1.0363	0.961519	0.900073	0.430393
156551615	PREDICTED: ADP-ribosylation factor-like protein 2 [Nasonia vitripennis]	21.0742	6.94678	24.46	1	2	0.92413	0.954217	1.06723	0.981858	1.02953	1.03489	0.999259	1.02122	1.04009	0.430588
345487997	PREDICTED: beta-galactosidase-like [Nasonia vitripennis]	72.4747	5.46533	7.37	1	3	1.01499	0.933621	1.05472	1.00111	0.947954	0.982566	0.975259	0.968593	0.967519	0.431
645021075	PREDICTED: 39S ribosomal protein L14, mitochondrial [Nasonia vitripennis]	16.0108	10.0083	24.83	1	3	0.877918	1.07046	0.943395	0.963923	0.998808	1.07671	0.982885	1.01947	1.05762	0.431246
644997193	PREDICTED: protein suppressor of forked [Nasonia vitripennis]	73.5987	6.91748	2.82	1	2	0.951215	1.01694	1.01253	0.993562	1.00504	1.02055	1.01197	1.01252	1.01908	0.431257
645005375	PREDICTED: liver carboxylesterase 1 isoform X2 [Nasonia vitripennis]	68.0069	6.37939	28.3	2	11	0.986517	1.06457	0.99912	1.01674	0.937419	1.02776	0.991433	0.985539	0.969317	0.431465
156537179	PREDICTED: CTL-like protein 1 [Nasonia vitripennis]	75.7225	7.57666	1.78	1	1	0.977262	1.09816	0.997359	1.02426	1.00638	0.953318	1.00492	0.988206	0.9648	0.431662
156538090	PREDICTED: ubiquitin-like domain-containing CTD phosphatase 1 [Nasonia vitripennis]	38.9293	7.7085	9.01	1	2	0.951636	0.936286	1.00574	0.964555	0.947507	1.03268	0.99865	0.992945	1.02943	0.431715
345489910	PREDICTED: frataxin homolog, mitochondrial [Nasonia vitripennis]	22.9965	7.86963	5.45	1	1	0.918287	0.985407	0.959904	0.954533	0.925335	1.22653	0.964563	1.03881	1.08829	0.431967
645027939	PREDICTED: putative ferric-chelate reductase 1 homolog isoform X3 [Nasonia vitripennis]	68.4376	7.88428	6.74	3	3	1.22265	0.893753	1.04277	1.05306	0.981763	1.00218	0.917802	0.96725	0.918514	0.432496
229892281	uncharacterized protein LOC100301488 precursor [Nasonia vitripennis]	30.1607	6.93213	15.5	1	4	0.985189	1.03169	1.06205	1.02631	1.0763	0.975687	0.83477	0.962252	0.937584	0.432796
156550366	PREDICTED: vacuolar protein sorting-associated protein 28 homolog [Nasonia vitripennis]	24.5364	5.5415	13.68	1	2	1.16788	0.993959	1.00379	1.05521	0.905782	1.03064	1.04288	0.993101	0.941142	0.43356
645021639	PREDICTED: 3-hydroxyisobutyrate dehydrogenase, mitochondrial [Nasonia vitripennis]	29.1561	9.20264	37.77	1	9	0.908943	1.04752	1.09881	1.01842	0.959062	0.96114	0.985607	0.968603	0.951081	0.433977
645008700	PREDICTED: protein no-on-transient A-like isoform X2 [Nasonia vitripennis]	59.4028	6.66846	19.47	2	11	1.00525	1.00651	0.900631	0.970796	1.02554	0.950226	1.06184	1.01254	1.043	0.434274
645041323	PREDICTED: dynein heavy chain, cytoplasmic-like, partial [Nasonia vitripennis]	30.2141	5.42725	17.67	1	3	1.07041	1.05933	0.966767	1.03217	1.02029	1.00126	0.985453	1.00233	0.971096	0.434311
645012288	PREDICTED: protein CREG1-like [Nasonia vitripennis]	35.3376	7.62061	12.94	1	3	1.0215	1.06196	0.996795	1.02675	1.08283	0.940363	0.909754	0.977649	0.952176	0.434653
269784695	ATP synthase subunit alpha, mitochondrial [Nasonia vitripennis]	59.0193	9.11475	65.38	3	36	0.975492	1.00615	1.066	1.01588	0.995046	0.994941	0.988258	0.992748	0.97723	0.434718
156537203	PREDICTED: mitochondrial chaperone BCS1 [Nasonia vitripennis]	48.6177	7.56201	10.82	1	4	1.08383	0.966564	1.03608	1.02882	1.0444	0.961577	0.968289	0.991422	0.963645	0.435245
345485377	PREDICTED: nuclear pore complex protein Nup155 isoform X2 [Nasonia vitripennis]	144.753	6.27783	2.16	2	3	1.08376	0.977446	1.0107	1.02397	1.00183	1.00174	0.985601	0.996389	0.973066	0.435485
156551469	PREDICTED: multidrug resistance-associated protein 5-like [Nasonia vitripennis]	148.392	8.14795	1	1	1	1.16454	0.888628	1.13236	1.06184	0.989951	0.836594	1.07127	0.965937	0.90968	0.436305
645001392	PREDICTED: programmed cell death protein 10 [Nasonia vitripennis]	23.4444	8.77783	6.7	1	1	1.76569	0.863973	0.841184	1.15695	0.910402	0.955194	0.808189	0.891262	0.770356	0.436355
288856279	NADH dehydrogenase [ubiquinone] 1 alpha subcomplex subunit 4 [Nasonia vitripennis]	9.11169	9.36377	52.44	1	5	0.906509	0.970914	1.04354	0.973653	0.984882	1.03489	1.01037	1.01005	1.03738	0.4364
645030488	PREDICTED: 28S ribosomal protein S5, mitochondrial-like [Nasonia vitripennis]	46.8988	9.979	12.62	1	4	1.0512	1.00638	0.929924	0.995836	0.980941	1.07149	1.05103	1.03449	1.03881	0.436739
345481548	PREDICTED: speckle-type POZ protein B-like [Nasonia vitripennis]	56.5253	6.22705	7.39	1	2	1.16046	0.920057	1.04436	1.04163	0.90844	1.01773	0.99898	0.975051	0.936083	0.436992
644998055	PREDICTED: cytochrome P450 4AB23 isoform X1 [Nasonia vitripennis]	57.4159	8.32373	12.98	12	4	0.961201	0.940403	1.05856	0.986723	0.968009	1.03855	1.0804	1.02898	1.04283	0.43713
156543034	PREDICTED: eukaryotic translation initiation factor 4E-binding protein 1 [Nasonia vitripennis]	12.3703	8.47021	27.35	1	3	0.882243	1.04486	1.01062	0.979242	1.01295	1.03044	1.02287	1.02209	1.04375	0.437733
645020349	PREDICTED: spectrin beta chain isoform X4 [Nasonia vitripennis]	271.197	5.50342	43.31	4	1	0.839566	0.799711	1.1402	0.926494	0.823549	1.15031	1.2295	1.06779	1.1525	0.438231
645007734	PREDICTED: multiple inositol polyphosphate phosphatase 1-like [Nasonia vitripennis]	52.1511	6.90283	18.9	1	7	1.03657	0.950915	1.07207	1.01985	0.962115	1.04767	0.911749	0.973845	0.954886	0.438645
345498228	PREDICTED: retinol dehydrogenase 12-like [Nasonia vitripennis]	36.3519	9.14404	5.25	1	1	0.84345	1.08649	0.96407	0.96467	0.962596	1.09237	1.0446	1.03319	1.07103	0.438647
645010757	PREDICTED: E3 ubiquitin-protein ligase UBR2 [Nasonia vitripennis]	205.103	5.93506	1.93	1	3	1.12809	1.0052	0.965119	1.0328	1.02028	0.939673	0.9978	0.985918	0.954606	0.438891
156548340	PREDICTED: UPF0545 protein C22orf39 homolog [Nasonia vitripennis]	18.0507	6.12549	10.81	1	1	1.23342	0.925886	0.995805	1.0517	1.02077	0.931109	0.953766	0.968549	0.920935	0.439135
345498496	PREDICTED: LOW QUALITY PROTEIN: voltage-dependent calcium channel subunit alpha-2/delta-3 [Nasonia vitripennis]	135.272	6.82959	1.16	1	1	1.45662	0.877291	0.959958	1.09796	1.0193	0.897638	0.899824	0.938922	0.855154	0.439193
229576877	signal peptidase 18 kDa subunit [Nasonia vitripennis]	20.5616	8.11865	32.22	1	1	0.923677	0.942082	1.06766	0.977806	0.943247	1.02697	1.16793	1.04605	1.06979	0.439872
156545571	PREDICTED: proteasome subunit alpha type-1-like [Nasonia vitripennis]	31.6138	6.80029	35.09	1	9	0.887608	1.05575	1.00509	0.982816	1.02143	1.0299	1.0252	1.02551	1.04344	0.440109
644994714	PREDICTED: rhythmically expressed gene 2 protein-like [Nasonia vitripennis]	29.6902	6.30322	8.14	1	1	1.23028	0.942996	1.00885	1.06071	0.989562	0.848159	1.06722	0.968315	0.912896	0.440461
345488201	PREDICTED: venom acid phosphatase Acph-1-like [Nasonia vitripennis]	44.7111	7.40088	12.66	1	5	1.02143	0.962508	1.02253	1.00216	0.978469	0.998533	0.975259	0.984087	0.98197	0.440506
645021861	PREDICTED: fatty acid synthase-like [Nasonia vitripennis]	74.225	5.64307	28.53	1	15	0.94785	1.0485	0.942539	0.979631	1.06356	0.976283	1.00891	1.01625	1.03738	0.440954
644996471	PREDICTED: protein ELYS isoform X3 [Nasonia vitripennis]	283.461	5.45264	0.79	3	1	1.29894	0.945473	0.956342	1.06692	0.999228	1.02665	0.843499	0.95646	0.896469	0.441127
645008038	PREDICTED: lethal(2) giant larvae protein homolog 1 isoform X4 [Nasonia vitripennis]	113.037	6.59521	15.73	4	12	1.13536	0.949982	1.01153	1.03229	0.963761	0.982936	1.00692	0.984538	0.953743	0.441303
645001897	PREDICTED: filaggrin isoform X10 [Nasonia vitripennis]	301.937	9.26123	2.91	11	5	0.958623	1.04611	0.965904	0.990212	1.00839	1.00032	1.04006	1.01626	1.02631	0.441756
156552615	PREDICTED: uncharacterized protein LOC100115498 [Nasonia vitripennis]	34.7113	5.21143	29.45	1	8	1.11676	1.01939	0.975005	1.03705	0.952324	0.980146	1.04884	0.993771	0.958267	0.441805
645018505	PREDICTED: alpha-tocopherol transfer protein-like isoform X2 [Nasonia vitripennis]	32.9451	7.94287	7.42	2	2	1.28955	0.898596	0.986497	1.05821	1.0255	0.906509	0.925601	0.952538	0.900137	0.44222
645039371	PREDICTED: pupal cuticle protein 20-like isoform X2 [Nasonia vitripennis]	24.5904	4.99561	4.07	2	1	1.74807	0.740699	1.00489	1.16455	1.10741	0.815378	0.750702	0.891163	0.765242	0.442253
645016011	PREDICTED: phosphoglucomutase-2 [Nasonia vitripennis]	67.7792	6.93213	21.16	1	12	0.97205	1.04496	1.01956	1.01219	0.97007	0.989717	1.01352	0.991103	0.979166	0.442824
645027158	PREDICTED: mesencephalic astrocyte-derived neurotrophic factor homolog [Nasonia vitripennis]	19.6783	8.39697	27.01	1	5	0.91215	1.04918	1.00316	0.988162	1.04526	1.00745	1.01845	1.02372	1.03598	0.442873
156554938	PREDICTED: prefoldin subunit 3-like isoform X1 [Nasonia vitripennis]	22.1922	5.40186	39.58	2	6	1.06412	1.03049	0.98727	1.02729	0.97207	1.0041	1.03323	1.00313	0.976483	0.442898
645009091	PREDICTED: copper transport protein ATOX1 [Nasonia vitripennis]	7.91805	7.82568	48.61	1	4	0.979539	1.08634	0.867517	0.977799	1.00763	1.00755	1.09593	1.03703	1.06058	0.443282
156542295	PREDICTED: uncharacterized protein LOC100113951 [Nasonia vitripennis]	10.5876	9.71533	31.87	1	2	1.00747	0.979625	1.09568	1.02759	0.978935	0.902943	1.05681	0.979564	0.953262	0.443484
645007484	PREDICTED: uncharacterized protein LOC103317906 isoform X2 [Nasonia vitripennis]	13.6742	9.84717	16.53	2	2	1.15951	0.910938	1.04377	1.03807	1.0256	0.909882	0.976752	0.970746	0.935143	0.443486
156553254	PREDICTED: troponin C, isoform 1-like [Nasonia vitripennis]	11.2362	3.95459	27.55	1	1	1.14664	0.906201	1.0567	1.03651	1.00023	0.940367	0.984589	0.975062	0.940715	0.443784
645029216	PREDICTED: peroxisomal leader peptide-processing protease [Nasonia vitripennis]	61.9907	7.95752	4.4	1	2	1.63501	0.86918	0.874802	1.12633	0.987796	0.864253	0.871549	0.907866	0.806038	0.443957
345495270	PREDICTED: lipoamide acyltransferase component of branched-chain alpha-keto acid dehydrogenase complex, mitochondrial isoform X4 [Nasonia vitripennis]	47.9354	7.60596	15.47	5	6	1.12461	1.01958	0.968553	1.03758	1.0543	0.930358	0.979551	0.988068	0.952281	0.444178
645012858	PREDICTED: LOW QUALITY PROTEIN: plasma membrane calcium-transporting ATPase 2 [Nasonia vitripennis]	131.601	7.63525	23.41	1	21	0.976993	1.01183	0.997389	0.995404	0.986498	0.993236	0.978634	0.986123	0.990676	0.444438
645022877	PREDICTED: dynamin-like 120 kDa protein, mitochondrial isoform X4 [Nasonia vitripennis]	106.55	6.84424	20.39	4	15	1.09863	0.978614	0.982277	1.01984	1.01464	0.979307	0.956586	0.98351	0.964377	0.444524
645030705	PREDICTED: peroxiredoxin 1 [Nasonia vitripennis]	21.7102	7.37158	49.23	1	7	0.828917	1.07128	0.998719	0.966306	1.02933	1.03684	1.01593	1.02737	1.06319	0.444617
345483543	PREDICTED: UBX domain-containing protein 6 [Nasonia vitripennis]	49.6915	6.12549	2.06	1	1	0.966337	1.07489	0.895742	0.978991	1.00518	1.06	1.01134	1.02551	1.04751	0.444652
645002308	PREDICTED: uncharacterized abhydrolase domain-containing protein DDB_G0269086 [Nasonia vitripennis]	46.6555	4.69092	33.94	1	13	0.922865	1.05352	0.98898	0.988456	1.00269	1.00432	1.06895	1.02532	1.03729	0.445203
645000819	PREDICTED: sex-regulated protein janus-A-like isoform X2 [Nasonia vitripennis]	13.836	6.93213	22.13	2	3	0.95688	1.06525	1.00268	1.00827	0.9766	1.01608	0.930859	0.974513	0.96652	0.445267
156554853	PREDICTED: peroxisomal multifunctional enzyme type 2-like [Nasonia vitripennis]	79.2407	8.26514	46.26	1	30	1.00166	0.983337	0.988394	0.991129	1.00952	0.977613	1.02314	1.00342	1.0124	0.445882
289177150	cytochrome P450 4BW5 [Nasonia vitripennis]	59.2929	8.82178	20.59	14	9	1.21564	0.971076	0.973546	1.05342	1.03703	0.948242	0.957417	0.980897	0.931154	0.445913
645006945	PREDICTED: mitochondrial import inner membrane translocase subunit Tim13-like [Nasonia vitripennis]	10.0929	7.04932	35.56	1	3	1.03158	0.980436	1.06957	1.02719	1.00525	1.01682	0.991602	1.00456	0.977962	0.446348
156541766	PREDICTED: signal peptidase complex subunit 1 [Nasonia vitripennis]	10.9048	9.78857	13.68	1	1	1.08373	0.939699	1.07112	1.03152	1.04319	0.960988	0.952824	0.985667	0.955552	0.446368
644994548	PREDICTED: calcium-binding mitochondrial carrier protein SCaMC-2 isoform X2 [Nasonia vitripennis]	50.4661	9.02686	4.92	2	2	1.02253	0.924508	1.192	1.04635	0.885405	0.938045	1.07267	0.965374	0.922614	0.446398
345488607	PREDICTED: alpha-tocopherol transfer protein-like isoform X2 [Nasonia vitripennis]	32.2884	6.85889	11.47	2	2	1.02694	0.930975	1.00302	0.986978	0.934049	0.842881	1.02946	0.935464	0.947806	0.446633
345483163	PREDICTED: tropinone reductase 2-like [Nasonia vitripennis]	26.9681	8.42627	48.22	1	10	1.03362	0.98176	1.03016	1.01518	1.02674	0.987827	0.971923	0.995495	0.980609	0.446697
156548466	PREDICTED: protein odr-4 homolog [Nasonia vitripennis]	51.8761	5.5542	11.64	1	4	1.06244	1.00327	0.997688	1.02113	1.04336	0.978591	0.957959	0.993303	0.972746	0.446916
645038566	PREDICTED: shootin-1 [Nasonia vitripennis]	72.1958	8.08936	2.8	1	1	0.988625	1.09473	0.998364	1.02724	0.92458	1.0677	0.948756	0.980344	0.954348	0.447248
156544556	PREDICTED: apolipoprotein D-like [Nasonia vitripennis]	30.2922	6.99072	16.19	1	2	1.09889	0.943678	1.03712	1.02656	0.914924	1.06892	0.926955	0.970266	0.945159	0.447663
645010099	PREDICTED: CD151 antigen-like [Nasonia vitripennis]	29.2572	6.94678	11.74	1	3	1.08827	0.996201	0.982757	1.02241	0.934325	1.05636	0.948266	0.979651	0.958181	0.447847
156547818	PREDICTED: sodium/potassium-transporting ATPase subunit alpha-like [Nasonia vitripennis]	114.315	5.2749	5.27	1	1	1.18651	0.956384	0.99207	1.04499	0.950091	0.981999	1.0165	0.982864	0.940552	0.448617
345497349	PREDICTED: ribosome-recycling factor, mitochondrial isoform X1 [Nasonia vitripennis]	32.7636	9.51025	23.08	2	4	1.08754	1.0625	0.952918	1.03432	1.00669	1.01449	0.972887	0.99802	0.964906	0.448679
156545581	PREDICTED: troponin C-like [Nasonia vitripennis]	16.9519	4.41162	16.33	1	2	1.03992	1.04007	0.953829	1.01127	0.92007	0.988441	1.02117	0.976561	0.965674	0.448708
345479338	PREDICTED: iron/zinc purple acid phosphatase-like protein [Nasonia vitripennis]	52.1935	6.48096	10.89	1	4	0.98081	0.992747	0.999057	0.990871	1.03918	1.00766	0.974552	1.00713	1.01641	0.449323
269784699	NADH dehydrogenase [ubiquinone] 1 beta subcomplex subunit 8, mitochondrial [Nasonia vitripennis]	20.4582	7.10791	34.48	2	5	0.974946	1.02678	1.03958	1.01377	1.01219	0.982321	0.992528	0.995678	0.982156	0.449755
289684213	serine protease homolog 125 precursor [Nasonia vitripennis]	29.6543	8.39697	22.71	3	4	1.00653	0.83071	1.08272	0.973323	1.1741	0.974811	1.01305	1.05399	1.08288	0.449892
345493313	PREDICTED: uncharacterized protein LOC100120380 [Nasonia vitripennis]	17.8181	5.22412	6.02	1	1	0.952819	1.01432	1.12998	1.03237	0.991572	0.910888	1.03551	0.979324	0.948614	0.450295
645000033	PREDICTED: exocyst complex component 7 [Nasonia vitripennis]	78.6698	7.23975	3.82	1	2	1.17832	1.02377	0.947969	1.05002	1.06735	0.791864	1.01862	0.95928	0.913583	0.450509
644992245	PREDICTED: ubiquitin thioesterase OTU1 [Nasonia vitripennis]	34.1781	5.80811	8.39	1	3	0.955472	1.09559	0.952149	1.00107	1.05076	1.02346	1.0494	1.04121	1.04009	0.450923
645004456	PREDICTED: microtubule-associated protein futsch isoform X2 [Nasonia vitripennis]	277.66	4.06885	0.69	2	2	1.26453	0.943274	0.984752	1.06419	1.06691	0.927261	0.919201	0.971122	0.91255	0.451615
644999509	PREDICTED: L-galactose dehydrogenase-like isoform X2 [Nasonia vitripennis]	37.5614	6.3667	12.08	2	2	1.20124	0.94802	0.988928	1.04606	1.02694	0.925874	0.976335	0.976382	0.933387	0.452091
645003225	PREDICTED: autophagy protein 5 [Nasonia vitripennis]	31.652	5.97314	10.11	1	2	1.0443	0.970417	0.96781	0.994176	1.02311	1.01204	1.0107	1.01528	1.02123	0.452363
645028691	PREDICTED: uncharacterized protein LOC100115997 [Nasonia vitripennis]	82.4003	7.40088	9.86	1	5	0.970574	0.985766	0.985209	0.980517	0.971588	1.01704	0.988251	0.992294	1.01201	0.452844
645024880	PREDICTED: protein RCC2 homolog isoform X3 [Nasonia vitripennis]	45.353	8.6167	11.14	3	4	0.912405	0.951887	1.04453	0.969606	0.996125	1.10275	0.956216	1.01836	1.05029	0.452918
645009058	PREDICTED: transcription elongation regulator 1-like isoform X1 [Nasonia vitripennis]	160.217	7.91357	1.13	1	1	1.05711	0.952026	1.12926	1.04613	0.984961	0.855066	1.08743	0.97582	0.93279	0.452972
156544994	PREDICTED: 26S protease regulatory subunit 8 [Nasonia vitripennis]	45.7472	8.49951	51.85	3	17	0.880413	1.04555	0.989442	0.971803	0.975175	1.03022	1.04093	1.01544	1.04491	0.453263
645004821	PREDICTED: pre-mRNA-processing factor 19-like, partial [Nasonia vitripennis]	31.7727	6.45557	13.01	1	3	1.10439	1.02426	0.966149	1.0316	1.02794	0.955634	0.998713	0.994097	0.963646	0.453751
156546363	PREDICTED: uncharacterized protein LOC100123145 [Nasonia vitripennis]	21.7404	8.20654	19.02	1	3	1.09141	1.06901	0.899927	1.02012	1.02582	0.946251	0.918105	0.963392	0.944395	0.454225
297515486	uncharacterized protein LOC100301994 precursor [Nasonia vitripennis]	85.7698	6.99072	18.05	1	12	1.15961	1.04577	0.933961	1.04645	1.0293	0.960338	0.980156	0.989931	0.945992	0.454412
645039355	PREDICTED: ubiquitin-like modifier-activating enzyme 5 isoform X1 [Nasonia vitripennis]	43.0652	4.77979	16.8	2	5	1.16149	0.972959	0.950992	1.02848	1.0542	0.89677	0.930547	0.960505	0.933908	0.454621
156538178	PREDICTED: aminomethyltransferase, mitochondrial [Nasonia vitripennis]	45.0276	8.86572	29.54	1	9	0.979205	0.99702	1.0252	1.00047	0.997527	0.980631	0.987901	0.988686	0.988217	0.454756
289191323	myosin 1A [Nasonia vitripennis]	117.181	9.14404	11.97	3	9	1.0699	1.02563	0.992481	1.02934	0.99234	1.01094	1.02449	1.00926	0.980493	0.454815
345491767	PREDICTED: charged multivesicular body protein 4b-like [Nasonia vitripennis]	24.6835	4.80518	16.82	1	4	0.95024	1.03899	0.992404	0.993879	1.02598	1.01218	1.0084	1.01552	1.02177	0.454926
645005028	PREDICTED: putative ATP-dependent RNA helicase me31b [Nasonia vitripennis]	50.7674	8.08936	61.57	1	28	0.872135	1.08556	0.971155	0.976283	1.00919	1.05967	1.01749	1.02879	1.05378	0.455548
645000691	PREDICTED: mucin-19-like [Nasonia vitripennis]	278.385	5.52881	6.48	1	14	1.05719	1.06416	0.93526	1.01887	1.02159	0.987346	0.920803	0.976578	0.95849	0.455656
345488838	PREDICTED: uncharacterized protein LOC100116563 [Nasonia vitripennis]	91.2607	8.95361	5.63	1	4	1.1939	0.967226	0.959342	1.04015	0.998661	0.97486	0.953932	0.975818	0.938146	0.455716
645030050	PREDICTED: tether containing UBX domain for GLUT4 [Nasonia vitripennis]	59.6149	6.771	1.7	1	1	0.915727	1.10467	0.903914	0.974769	1.03897	1.01073	1.03714	1.02895	1.05558	0.455764
645007396	PREDICTED: uncharacterized protein LOC100118844 isoform X4 [Nasonia vitripennis]	40.9518	9.96436	6.16	3	1	0.98814	0.884796	1.06595	0.97963	1.06694	0.9972	1.0145	1.02621	1.04755	0.456003
645024496	PREDICTED: 60 kDa heat shock protein, mitochondrial-like [Nasonia vitripennis]	60.5488	5.63037	70.45	1	29	1.00344	1.02053	0.950663	0.991544	1.00016	1.04387	0.995141	1.01306	1.0217	0.456245
345487183	PREDICTED: integrin beta-PS-like [Nasonia vitripennis]	93.238	5.50342	13.81	1	8	1.043	1.02965	0.969875	1.01417	0.989994	1.02072	0.962387	0.991033	0.977183	0.4564
156553409	PREDICTED: probable medium-chain specific acyl-CoA dehydrogenase, mitochondrial [Nasonia vitripennis]	45.2022	8.17725	56.87	1	20	0.992664	1.02225	0.968994	0.994637	1.01843	1.00152	1.00417	1.00804	1.01348	0.456476
345486124	PREDICTED: NFU1 iron-sulfur cluster scaffold homolog, mitochondrial-like [Nasonia vitripennis]	31.2049	5.78271	16.55	1	3	1.02594	0.963946	1.00312	0.997671	1.01359	0.997312	1.03388	1.01493	1.0173	0.456764
645037531	PREDICTED: CAD protein-like [Nasonia vitripennis]	91.3555	6.90283	7.72	1	5	0.909167	1.0356	1.01161	0.985457	0.985844	1.07803	1.00982	1.02457	1.03969	0.457433
644996506	PREDICTED: 28S ribosomal protein S22, mitochondrial [Nasonia vitripennis]	40.786	6.81494	25.14	1	8	0.936478	1.06164	0.931918	0.97668	0.954449	1.04165	1.06877	1.02162	1.04602	0.457707
289177053	cytochrome P450 6BD2 [Nasonia vitripennis]	58.3492	9.1001	6.34	1	2	1.08559	0.892777	1.1397	1.03935	0.939499	0.997698	0.991214	0.976137	0.939177	0.458648
345486704	PREDICTED: histone H3 [Nasonia vitripennis]	15.3785	11.2681	32.35	3	1	0.901057	1.04279	1.15278	1.03221	0.921296	1.01028	0.975438	0.969003	0.938767	0.459567
645017288	PREDICTED: bromodomain adjacent to zinc finger domain protein 1A isoform X3 [Nasonia vitripennis]	163.258	6.39209	0.64	3	1	0.855119	1.11198	0.93786	0.968321	0.99408	1.04887	1.05325	1.03207	1.06583	0.45996
645033064	PREDICTED: fatty-acid amide hydrolase 2 isoform X2 [Nasonia vitripennis]	58.9976	8.29443	14.39	2	7	0.988736	1.01634	0.964171	0.989751	1.04719	0.970043	1.01837	1.01187	1.02235	0.460003
156547171	PREDICTED: arylsulfatase B [Nasonia vitripennis]	64.403	6.59521	5.51	1	3	0.762212	0.913711	1.14061	0.938845	1.09531	0.999513	1.00188	1.03224	1.09948	0.460084
156544526	PREDICTED: malignant T-cell-amplified sequence 1 [Nasonia vitripennis]	20.4307	9.33447	26.92	1	4	0.997608	0.938476	1.03465	0.990245	0.982583	1.04883	1.02252	1.01798	1.02801	0.460324
345479343	PREDICTED: eukaryotic translation initiation factor 3 subunit G-like [Nasonia vitripennis]	31.6659	7.76709	10.88	1	2	0.831757	1.058	0.988432	0.959396	0.965686	1.06472	1.02602	1.01881	1.06193	0.46052
645022234	PREDICTED: glycogen [starch] synthase-like [Nasonia vitripennis]	20.5099	4.64014	20.79	1	3	0.95479	1.01096	0.992393	0.986046	0.980251	0.990217	1.0636	1.01136	1.02567	0.460644
645014556	PREDICTED: probable glutamine-dependent NAD(+) synthetase isoform X2 [Nasonia vitripennis]	81.6016	6.81494	11.08	2	6	1.13525	0.911192	1.03782	1.02809	0.9976	0.963375	0.962251	0.974409	0.947788	0.460992
645017490	PREDICTED: ribosome-releasing factor 2, mitochondrial isoform X2 [Nasonia vitripennis]	79.9014	7.02002	1.53	2	1	1.32539	0.908186	0.977367	1.07032	1.04697	0.939438	0.889205	0.958537	0.895565	0.461033
156555564	PREDICTED: probable 4-coumarate--CoA ligase 3 isoform X1 [Nasonia vitripennis]	62.6324	7.6499	25	2	10	1.13073	1.00574	0.94936	1.02861	1.04931	0.953512	0.922126	0.974982	0.947864	0.461085
345479998	PREDICTED: ubiquitin fusion degradation protein 1 homolog [Nasonia vitripennis]	33.329	7.15186	14.97	1	3	1.01862	0.982786	0.99521	0.998872	0.993985	0.990698	0.985592	0.990091	0.991209	0.461254
345498295	PREDICTED: DNA damage-binding protein 1 [Nasonia vitripennis]	126.551	5.36377	10.35	1	9	1.15358	0.969433	1.00019	1.04107	0.98955	1.02284	0.966189	0.992861	0.953695	0.461705
645034685	PREDICTED: filamin-A isoform X1 [Nasonia vitripennis]	242.29	6.62451	58.07	5	102	0.978707	0.992386	1.01454	0.99521	1.00794	0.999936	1.00382	1.0039	1.00873	0.462188
645018483	PREDICTED: angio-associated migratory cell protein [Nasonia vitripennis]	46.239	4.50049	12.68	1	4	1.56396	0.852727	0.911777	1.10949	1.02931	0.923402	0.79679	0.916501	0.826058	0.462194
645020518	PREDICTED: mitochondrial enolase superfamily member 1-like isoform X2 [Nasonia vitripennis]	50.3336	6.07471	7.85	2	3	1.18426	0.95534	0.991258	1.04362	1.01596	1.0101	0.913736	0.97993	0.938973	0.462306
156548206	PREDICTED: sodium- and chloride-dependent GABA transporter 1 [Nasonia vitripennis]	69.6754	7.69385	11.76	1	8	1.18511	0.967837	0.954789	1.03591	0.978949	0.966997	0.97956	0.975169	0.941362	0.462341
644999889	PREDICTED: aquaporin AQPAn.G [Nasonia vitripennis]	26.4399	6.66846	10.98	1	4	1.04804	1.05162	0.748941	0.949534	1.0809	1.00806	1.01038	1.03311	1.08802	0.463081
645028533	PREDICTED: serine/threonine-protein phosphatase 4 regulatory subunit 3 [Nasonia vitripennis]	95.5044	4.95752	4.03	1	3	1.08697	1.01481	0.961888	1.02122	0.899903	1.05872	0.962308	0.973644	0.953409	0.463238
345484435	PREDICTED: uncharacterized protein LOC100679805 [Nasonia vitripennis]	19.0078	8.51416	15.24	1	2	0.93916	1.07267	0.936463	0.982763	1.04407	1.03363	0.987664	1.02179	1.03971	0.463401
156552077	PREDICTED: arylsulfatase B-like [Nasonia vitripennis]	78.8519	6.30322	3.1	1	2	1.0139	1.02966	1.01084	1.01813	0.935854	1.01177	1.0336	0.993742	0.976043	0.464439
269784711	cytochrome b-c1 complex subunit 8 [Nasonia vitripennis]	9.62204	9.62744	60.24	1	6	0.995878	0.942503	1.16439	1.03426	0.985114	0.954287	0.998293	0.979231	0.946797	0.464548
194239717	sortilin-related receptor, L(DLR class) A repeats-containing-like [Nasonia vitripennis]	233.615	5.64307	4.96	3	8	1.1727	0.952849	0.930997	1.01885	0.985756	0.95895	0.919207	0.954638	0.936977	0.464919
156544966	PREDICTED: 39S ribosomal protein L16, mitochondrial [Nasonia vitripennis]	28.2366	9.62744	12.55	1	2	1.14194	0.953421	1.01223	1.03586	1.05629	0.938371	0.950516	0.981725	0.947737	0.465058
345490227	PREDICTED: dehydrogenase/reductase SDR family member 11-like [Nasonia vitripennis]	31.4237	9.20264	38.46	1	12	0.939684	1.04981	1.05047	1.01332	0.954311	0.996597	0.99402	0.981643	0.968737	0.465178
645039818	PREDICTED: glutaredoxin-3 isoform X2 [Nasonia vitripennis]	32.4825	5.31299	45.26	2	10	0.918664	1.03858	0.986552	0.981265	1.00945	1.03898	0.986888	1.01177	1.03109	0.465435
229577290	O-glycosyltransferase [Nasonia vitripennis]	118.746	6.78564	4.71	4	3	0.988621	0.956426	0.957308	0.967452	1.13042	1.01218	0.913493	1.0187	1.05297	0.465513
645010326	PREDICTED: saccharopine dehydrogenase-like oxidoreductase [Nasonia vitripennis]	46.8232	8.52881	22.51	1	8	0.879596	1.0022	1.01494	0.965579	0.953152	1.02532	1.04132	1.0066	1.04248	0.466024
345496179	PREDICTED: nucleolar protein 56 [Nasonia vitripennis]	55.4941	8.83643	18.44	1	8	0.976843	0.937443	1.04171	0.985332	0.976775	1.03604	1.02937	1.01406	1.02915	0.466224
645020651	PREDICTED: putative mitochondrial inner membrane protein isoform X3 [Nasonia vitripennis]	82.5148	8.29443	44.47	3	39	0.922669	1.0025	1.02958	0.984915	1.00839	1.00019	1.02559	1.01139	1.02688	0.46672
300795315	probable 26S proteasome complex subunit sem1 [Nasonia vitripennis]	9.29615	4.00537	29.49	1	1	0.955791	0.914729	1.00696	0.959161	0.852162	1.17141	1.09445	1.03934	1.08359	0.466864
156549557	PREDICTED: general odorant-binding protein 56d [Nasonia vitripennis]	13.7357	4.48779	62.99	1	6	0.859561	0.995819	1.05311	0.969496	1.05853	1.01076	0.986434	1.01858	1.05062	0.467405
156548264	PREDICTED: ubiquitin-like-conjugating enzyme ATG3 [Nasonia vitripennis]	36.0274	4.76709	4.11	1	1	1.08306	1.02776	0.969171	1.02666	1.05006	0.98418	0.931473	0.98857	0.962897	0.467666
645020693	PREDICTED: facilitated trehalose transporter Tret1-2 homolog [Nasonia vitripennis]	59.9427	6.31592	8.08	1	4	0.911542	0.93722	1.08375	0.977506	0.97839	1.01932	1.08284	1.02685	1.05048	0.468307
645037920	PREDICTED: U6 snRNA-associated Sm-like protein LSm8 [Nasonia vitripennis]	10.4583	4.70361	23.96	1	2	1.02295	0.974286	1.07528	1.02417	0.959201	0.952253	1.05509	0.988847	0.965511	0.468713
156554082	PREDICTED: dehydrogenase/reductase SDR family member 11-like [Nasonia vitripennis]	27.0232	8.19189	25.51	1	4	1.02351	1.07141	0.76902	0.954649	1.06711	1.00986	1.01586	1.03094	1.07991	0.469473
645032158	PREDICTED: phosrestin-2 [Nasonia vitripennis]	42.5003	8.14795	20.73	1	5	1.00789	0.984767	1.09695	1.02987	1.06207	0.968924	0.937227	0.989406	0.960709	0.469725
645038303	PREDICTED: uncharacterized threonine-rich GPI-anchored glycoprotein PJ4664.02-like [Nasonia vitripennis]	290.805	5.021	0.68	1	1	1.12543	0.95757	1.01047	1.03116	1.03387	0.983775	0.940981	0.986207	0.95641	0.46975
156546520	PREDICTED: T-complex protein 1 subunit epsilon [Nasonia vitripennis]	59.1019	6.07471	47.05	1	23	0.879812	1.06648	0.976202	0.974165	1.00136	1.05114	1.00452	1.01901	1.04603	0.46995
645034278	PREDICTED: serine protease inhibitor 3/4 isoform X14 [Nasonia vitripennis]	44.0956	5.19873	47.49	11	1	0.92823	0.939769	1.08123	0.983078	1.00675	1.02223	1.04008	1.02302	1.04063	0.470179
644992809	PREDICTED: uncharacterized protein LOC100123802 isoform X2 [Nasonia vitripennis]	36.6948	4.90674	8.36	2	2	1.2039	0.966799	0.971995	1.04757	1.07451	0.922421	0.923202	0.973379	0.929181	0.470208
156541034	PREDICTED: elongation factor G, mitochondrial [Nasonia vitripennis]	83.6779	6.56592	22.33	1	13	1.00528	1.02265	0.971488	0.999807	1.00953	1.03073	1.00083	1.0137	1.01389	0.470647
645011559	PREDICTED: trichohyalin-like isoform X2 [Nasonia vitripennis]	65.9493	6.18896	16.7	2	9	0.95423	1.05178	0.954065	0.986693	1.02169	1.01011	1.0067	1.01283	1.02649	0.470843
645029416	PREDICTED: tetratricopeptide repeat protein 1 [Nasonia vitripennis]	25.5025	4.88135	11.71	1	2	1.0138	1.10522	0.951486	1.0235	1.00503	0.976502	0.980479	0.987337	0.964668	0.47147
645015334	PREDICTED: paired amphipathic helix protein Sin3a isoform X7 [Nasonia vitripennis]	149.855	7.25439	0.88	8	1	1.4663	0.89294	0.934962	1.09807	1.08554	0.921297	0.807777	0.938205	0.854415	0.471692
345498132	PREDICTED: E3 ubiquitin-protein ligase UBR5 isoform X4 [Nasonia vitripennis]	318.616	5.68115	1.85	4	4	1.09185	0.950296	0.973346	1.00516	0.971581	0.990896	0.943646	0.968708	0.96373	0.471918
645006990	PREDICTED: alpha-endosulfine [Nasonia vitripennis]	11.9833	9.5249	23.42	1	2	0.896659	1.09611	0.935295	0.97602	1.02982	1.01988	1.02376	1.02449	1.04966	0.472277
645017377	PREDICTED: 4-coumarate--CoA ligase 1 [Nasonia vitripennis]	60.2576	7.40088	24.54	1	11	0.977216	0.960236	1.02437	0.987273	0.98353	1.01164	1.01898	1.00472	1.01767	0.472508
645038868	PREDICTED: piezo-type mechanosensitive ion channel component 2 isoform X7 [Nasonia vitripennis]	291.421	7.7085	1.54	7	3	1.03194	1.00271	1.01613	1.01693	1.02573	0.959273	1.01331	0.999437	0.982799	0.472564
345489101	PREDICTED: glycine-rich cell wall structural protein 1.0 isoform X2 [Nasonia vitripennis]	31.6232	8.03076	3.4	1	1	1.14142	0.88816	1.12916	1.05291	1.09952	0.936357	0.868618	0.968165	0.91951	0.473474
350536055	nicotinic acetylcholine receptor beta 1 subunit precursor [Nasonia vitripennis]	59.6624	7.72314	2.5	1	1	1.00058	1.13429	1.00188	1.04558	1.12761	0.785981	0.966668	0.960086	0.918231	0.473582
156551213	PREDICTED: ras-related protein Rab-8A isoform X2 [Nasonia vitripennis]	23.7183	9.05615	31.58	2	5	1.015	1.05198	0.98528	1.01742	1.00549	0.995927	1.00456	1.00199	0.984834	0.473711
644997504	PREDICTED: titin-like [Nasonia vitripennis]	587.13	5.021	4.37	1	17	1.17602	0.928051	0.99856	1.03421	1.03562	0.946523	0.92928	0.970475	0.938373	0.47432
345494302	PREDICTED: LOW QUALITY PROTEIN: cytoplasmic aconitate hydratase [Nasonia vitripennis]	97.5847	7.10791	43.39	1	29	0.966149	1.04925	1.03541	1.01694	0.94325	1.04141	0.974553	0.986406	0.969976	0.474451
645021845	PREDICTED: protein ERGIC-53 [Nasonia vitripennis]	52.3521	5.63037	23.97	1	10	0.927761	1.08217	0.953214	0.987715	1.00768	1.04115	1.02971	1.02618	1.03894	0.47462
644995155	PREDICTED: tuftelin-interacting protein 11 [Nasonia vitripennis]	94.5755	7.23975	0.97	1	1	0.564942	0.598823	1.45606	0.873275	0.953225	1.39814	1.03006	1.12714	1.29071	0.474899
156554192	PREDICTED: tryptophan--tRNA ligase, mitochondrial [Nasonia vitripennis]	43.8832	8.63135	3.37	1	1	0.915984	1.00871	1.03934	0.988013	1.01071	1.00547	1.0388	1.01833	1.03068	0.475115
645025877	PREDICTED: coiled-coil domain-containing protein 124 [Nasonia vitripennis]	23.8287	9.56885	10.14	1	1	1.08236	0.954454	0.912545	0.983121	0.999422	1.05359	1.02248	1.02516	1.04276	0.47539
229577321	splicing factor 3b, subunit 3 [Nasonia vitripennis]	135.389	5.46533	6.83	1	6	1.10945	0.909531	1.04756	1.02218	1.00622	0.976776	0.936049	0.973014	0.951901	0.475425
645005221	PREDICTED: 1-phosphatidylinositol 4,5-bisphosphate phosphodiesterase classes I and II [Nasonia vitripennis]	143.812	6.354	6.91	1	7	1.0025	0.976509	1.01732	0.998774	0.970894	0.99078	0.99999	0.987221	0.988433	0.475731
645007142	PREDICTED: uncharacterized protein LOC100677826 isoform X1 [Nasonia vitripennis]	213.958	8.90967	0.87	3	2	0.970708	1.01088	0.986834	0.989475	1.06077	0.942906	1.06162	1.02177	1.03263	0.476211
345486982	PREDICTED: COMM domain-containing protein 4 [Nasonia vitripennis]	21.1271	5.2876	14.74	1	2	1.08545	1.05187	0.938324	1.02521	0.954086	1.02181	0.985227	0.98704	0.962765	0.476303
345497957	PREDICTED: SEC23-interacting protein-like isoform X6 [Nasonia vitripennis]	147.831	5.49072	3.39	6	4	1.06829	0.997709	0.986859	1.01762	1.06672	0.944953	0.917846	0.976506	0.959598	0.476677
204305388	mitochondrial hydrogen-transporting ATP synthase coupling factor F, partial [Nasonia vitripennis]	12.5723	9.94971	46.73	2	5	0.96882	1.03767	1.06679	1.02443	1.00802	0.949602	1.02786	0.995161	0.971431	0.477141
645016684	PREDICTED: neurochondrin homolog [Nasonia vitripennis]	83.4157	6.03662	15.91	1	11	1.08144	0.960378	1.0274	1.02307	0.977633	0.937598	1.04402	0.986418	0.964172	0.477174
645013504	PREDICTED: LOW QUALITY PROTEIN: elongation of very long chain fatty acids protein 4-like [Nasonia vitripennis]	36.6983	9.67139	5.35	1	2	0.950227	1.10151	0.859925	0.970554	1.12254	0.999122	0.984881	1.03551	1.06693	0.477217
345480424	PREDICTED: fatty acyl-CoA reductase 1-like [Nasonia vitripennis]	60.1017	7.60596	9.02	1	5	0.980456	1.06716	0.807473	0.951695	1.14146	0.97654	0.961787	1.02659	1.0787	0.477225
300794756	uncharacterized protein LOC100499164 [Nasonia vitripennis]	19.1451	9.26123	7.14	1	1	0.964931	1.08864	1.05381	1.03579	0.986291	0.845447	1.08876	0.9735	0.93986	0.477442
345481686	PREDICTED: cGMP-dependent protein kinase, isozyme 2 forms cD4/T1/T3A/T3B isoform X2 [Nasonia vitripennis]	77.4218	6.1001	9.93	2	1	1.47284	0.764406	1.0913	1.10951	1.12389	0.898681	0.766269	0.929614	0.837857	0.477445
345483494	PREDICTED: protein DDI1 homolog 2-like [Nasonia vitripennis]	13.6679	5.56689	12.5	1	1	0.948478	0.980001	1.02338	0.983952	1.10621	0.964347	0.994706	1.02175	1.03842	0.477448
645009128	PREDICTED: sorting nexin-6 isoform X2 [Nasonia vitripennis]	47.367	7.06396	19.85	2	7	1.00467	1.01308	0.97757	0.998441	1.03977	0.986561	1.01296	1.0131	1.01468	0.477594
156541524	PREDICTED: mitochondrial intermediate peptidase [Nasonia vitripennis]	77.6857	6.34131	15.44	1	8	0.953412	1.00473	1.09153	1.01656	0.971768	0.933043	1.02958	0.978129	0.962198	0.477623
645000199	PREDICTED: N-acetylserotonin O-methyltransferase-like protein [Nasonia vitripennis]	22.6568	6.22705	21.36	1	4	0.927183	1.00391	1.02991	0.987002	0.998993	1.08222	0.982235	1.02115	1.0346	0.477898
645038153	PREDICTED: diphthine--ammonia ligase [Nasonia vitripennis]	79.6223	6.02393	4.38	1	3	1.3037	0.824555	0.986109	1.03812	0.952706	0.893514	0.935403	0.927207	0.893158	0.477913
645027642	PREDICTED: uncharacterized abhydrolase domain-containing protein DDB_G0269086-like isoform X2 [Nasonia vitripennis]	82.4518	4.4624	25.45	10	19	0.953008	0.992826	1.02443	0.990086	1.00172	0.993097	1.03078	1.00853	1.01863	0.478068
227473491	unnamed protein product [Nasonia vitripennis]	44.9964	8.95361	3.45	2	1	1.16102	0.919603	1.04851	1.04305	1.06329	0.967566	0.900986	0.977281	0.936948	0.478216
229577285	alpha-glucosidase-like [Nasonia vitripennis]	65.7586	7.72314	54.03	1	26	0.923542	0.886972	1.09151	0.96734	1.03111	0.98827	1.0343	1.01789	1.05226	0.478252
345488002	PREDICTED: pseudouridylate synthase 7 homolog [Nasonia vitripennis]	94.6385	6.11279	50.66	1	37	0.791778	1.05129	1.02859	0.95722	0.977335	1.14122	0.984489	1.03435	1.08058	0.478282
645003149	PREDICTED: ATP-binding cassette sub-family F member 1 isoform X2 [Nasonia vitripennis]	70.7468	6.771	13.4	2	8	0.945648	1.08029	0.906731	0.977555	0.9828	1.03927	1.04183	1.0213	1.04475	0.478326
345491666	PREDICTED: nucleolin-like isoform X2 [Nasonia vitripennis]	22.1426	4.65283	12.95	2	2	0.983666	1.02325	0.977857	0.994923	1.03499	0.99965	0.994817	1.00982	1.01497	0.478421
345490901	PREDICTED: spermine oxidase-like [Nasonia vitripennis]	59.1214	7.13721	5.8	1	3	0.961468	1.0204	0.884391	0.955419	1.06686	0.871002	1.13584	1.02457	1.07238	0.478532
644998160	PREDICTED: nucleoside diphosphate kinase [Nasonia vitripennis]	26.4945	9.70068	49.58	1	11	0.87026	0.964811	1.05554	0.963538	0.941414	1.12882	1.00056	1.0236	1.06234	0.47866
345482984	PREDICTED: probable ATP-dependent RNA helicase DDX46 isoform X4 [Nasonia vitripennis]	117.434	8.74854	6.45	5	4	1.18727	0.877983	1.05379	1.03968	0.962168	0.949968	0.99536	0.969165	0.932177	0.479781
645005126	PREDICTED: lon protease homolog, mitochondrial isoform X2 [Nasonia vitripennis]	112.708	6.72705	19.94	2	16	1.04204	1.03274	0.970672	1.01515	1.0151	1.00222	0.965284	0.994202	0.979366	0.479953
645028541	PREDICTED: tetratricopeptide repeat protein 7B isoform X2 [Nasonia vitripennis]	94.9287	6.50732	4.27	2	3	1.28265	0.969259	0.945721	1.06588	1.06172	0.953114	0.907809	0.974214	0.914002	0.479987
645017692	PREDICTED: zinc finger matrin-type protein CG9776 isoform X2 [Nasonia vitripennis]	126.851	8.93896	3.67	2	2	1.18862	1.00308	0.940189	1.04396	1.06578	0.930583	0.932716	0.976358	0.935242	0.48028
644992520	PREDICTED: alpha-aminoadipic semialdehyde synthase, mitochondrial isoform X2 [Nasonia vitripennis]	106.996	7.00537	20.08	3	17	1.02056	0.97873	0.965107	0.988131	0.992635	0.991339	1.02857	1.00418	1.01624	0.480791
644992712	PREDICTED: twitchin [Nasonia vitripennis]	855.819	6.0874	45.82	3	294	0.99259	1.00191	1.01956	1.00468	0.995364	1.00001	0.999929	0.998434	0.993779	0.481108
156542482	PREDICTED: eukaryotic translation initiation factor 3 subunit M [Nasonia vitripennis]	44.1388	5.71924	35.71	1	12	0.935198	1.03921	0.996246	0.990216	1.00558	1.00081	1.04016	1.01552	1.02555	0.481267
345497864	PREDICTED: multidrug resistance-associated protein 4-like [Nasonia vitripennis]	141.918	6.7124	4.66	1	3	1.08878	0.965151	1.01051	1.02148	1.01851	0.933629	1.0079	0.98668	0.965931	0.481646
645006304	PREDICTED: microtubule-associated protein futsch-like [Nasonia vitripennis]	820.43	6.34131	27.49	1	103	1.02048	1.01001	0.98706	1.00585	1.00508	0.983217	1.00146	0.996588	0.990789	0.482034
345479165	PREDICTED: importin-13 isoform X2 [Nasonia vitripennis]	105.641	5.94775	1.48	2	1	1.48083	0.875014	0.941328	1.09906	1.08145	0.851642	0.890255	0.941117	0.856296	0.483176
156548312	PREDICTED: 40S ribosomal protein S23 [Nasonia vitripennis]	16.0058	10.4624	50.35	1	7	0.991589	0.991998	1.01062	0.998068	0.996882	1.02292	0.99868	1.00616	1.00811	0.483176
645014865	PREDICTED: NADH-cytochrome b5 reductase 2 isoform X3 [Nasonia vitripennis]	34.3901	8.68994	20.45	3	8	0.981647	0.992342	1.02818	1.00072	0.987125	0.99621	0.98533	0.989555	0.98884	0.483251
644995295	PREDICTED: U2 small nuclear ribonucleoprotein A' [Nasonia vitripennis]	34.0328	9.21729	8.5	1	2	1.12665	0.975615	0.966418	1.02289	1.02943	0.994439	0.891039	0.971635	0.949888	0.483911
645016706	PREDICTED: LOW QUALITY PROTEIN: xanthine dehydrogenase-like [Nasonia vitripennis]	152.046	6.88818	9.13	1	7	0.963036	0.944554	1.07214	0.993243	1.03214	1.01234	1.02811	1.0242	1.03117	0.484883
345478852	PREDICTED: basement membrane-specific heparan sulfate proteoglycan core protein isoform X3 [Nasonia vitripennis]	336.418	5.23682	27.23	4	69	1.04739	0.98652	0.994053	1.00932	1.00843	1.00547	0.953915	0.989273	0.980137	0.484978
645012847	PREDICTED: heat shock 70 kDa protein cognate 3 isoform X2 [Nasonia vitripennis]	105.714	5.68115	33.3	2	26	1.00801	1.01842	0.94851	0.991647	0.998593	1.01827	1.00988	1.00892	1.01742	0.48575
645012699	PREDICTED: metaxin-2-like isoform X3 [Nasonia vitripennis]	37.7188	5.2876	4.01	3	1	1.07972	0.983367	1.00741	1.0235	1.02094	1.02476	0.92361	0.989769	0.967043	0.485828
288856267	NADH dehydrogenase [ubiquinone] 1 beta subcomplex subunit 3 [Nasonia vitripennis]	12.7655	8.63135	16.51	1	2	0.991714	1.00246	1.06958	1.02125	0.986979	0.980717	1.02973	0.999144	0.978352	0.485841
644992658	PREDICTED: polycystic kidney disease protein 1-like 3 [Nasonia vitripennis]	68.6584	7.97217	17.21	1	10	0.622267	1.18257	0.939703	0.914846	1.04517	1.10065	0.980366	1.04206	1.13906	0.485948
645015670	PREDICTED: high mobility group protein DSP1 [Nasonia vitripennis]	45.3293	9.31982	22.64	1	10	0.858185	1.05569	1.0029	0.972257	0.956077	1.04486	1.07429	1.02508	1.05433	0.486071
156547010	PREDICTED: uncharacterized protein LOC100116049 [Nasonia vitripennis]	55.7425	8.08936	6.26	1	3	0.914571	1.03458	1.01446	0.987872	1.04183	1.00787	1.00367	1.01779	1.03028	0.486076
156537747	PREDICTED: adenylosuccinate lyase [Nasonia vitripennis]	54.2469	7.13721	35.76	1	15	0.924731	1.02598	1.08022	1.01031	0.972295	0.993839	0.9572	0.974445	0.9645	0.48608
645012758	PREDICTED: uncharacterized protein LOC100118265 [Nasonia vitripennis]	81.6432	6.94678	11.22	1	6	0.965188	1.00241	1.10366	1.02375	0.94582	0.986407	1.02912	0.987115	0.964212	0.486593
345489360	PREDICTED: mitochondrial import inner membrane translocase subunit Tim17-B-like [Nasonia vitripennis]	17.1718	8.30908	12.88	1	2	1.11623	0.912465	1.06069	1.0298	0.984597	1.00935	0.950439	0.981463	0.953066	0.486848
345479950	PREDICTED: probable ubiquitin carboxyl-terminal hydrolase FAF-X isoform X2 [Nasonia vitripennis]	292.801	6.20166	3	2	5	1.06938	1.03784	0.928694	1.01197	1.03827	0.967085	0.893837	0.966396	0.954964	0.48725
156554399	PREDICTED: ATP-dependent RNA helicase p62 isoform X2 [Nasonia vitripennis]	60.7466	9.5249	19.42	2	4	0.899447	1.05506	0.936397	0.963634	0.900384	1.05334	1.1213	1.02501	1.06369	0.488016
345486851	PREDICTED: protein yellow [Nasonia vitripennis]	48.6077	6.7417	25.29	1	8	1.21548	0.945509	0.995064	1.05202	1.02839	0.968551	0.963291	0.986744	0.937953	0.488033
645030377	PREDICTED: NEDD8-activating enzyme E1 catalytic subunit isoform X1 [Nasonia vitripennis]	49.0219	6.75635	4.38	1	1	1.05481	1.06001	0.980741	1.03185	1.0964	0.94248	0.914827	0.984568	0.954176	0.488252
156555145	PREDICTED: PCI domain-containing protein 2 [Nasonia vitripennis]	45.5587	9.17334	3.08	1	1	0.901062	0.972389	1.02769	0.967048	0.881049	1.13038	1.08367	1.0317	1.06686	0.488527
644996693	PREDICTED: isocitrate dehydrogenase [NAD] subunit gamma, mitochondrial-like [Nasonia vitripennis]	43.088	7.86963	11.05	1	3	1.05828	0.964449	0.995039	1.00592	0.983606	0.996724	0.972263	0.984198	0.978404	0.488619
644999354	PREDICTED: uroporphyrinogen decarboxylase isoform X5 [Nasonia vitripennis]	39.8448	6.7417	16.85	5	4	0.884837	0.987033	1.06654	0.97947	1.0208	1.00745	1.03136	1.01987	1.04124	0.488717
156545293	PREDICTED: uncharacterized protein C9orf114 homolog [Nasonia vitripennis]	45.0984	6.58057	3.22	1	1	1.38508	0.943038	0.899804	1.07597	1.02069	0.95769	0.883939	0.954107	0.886739	0.488724
645003054	PREDICTED: kynurenine--oxoglutarate transaminase 3-like [Nasonia vitripennis]	51.8847	9.01221	25.16	1	10	0.933818	1.04133	1.0038	0.992981	1.00541	1.01035	1.03899	1.01825	1.02545	0.488947
645015304	PREDICTED: charged multivesicular body protein 2a [Nasonia vitripennis]	25.8581	5.33838	14.04	1	4	0.869107	1.08736	0.957597	0.971355	0.996779	1.01773	1.04813	1.02088	1.05098	0.489242
345490938	PREDICTED: leukotriene A-4 hydrolase [Nasonia vitripennis]	74.526	5.80811	32.47	1	17	0.859445	1.08363	0.974396	0.972489	1.00993	1.04116	1.01561	1.02224	1.05115	0.489437
289330083	serine protease 67 precursor [Nasonia vitripennis]	44.5372	8.1333	5.13	3	1	1.06194	1.06592	0.969694	1.03252	1.05699	1.0245	0.859283	0.980258	0.949387	0.489864
645004751	PREDICTED: 3-ketodihydrosphingosine reductase [Nasonia vitripennis]	39.6957	7.60596	6.98	1	2	1.11304	0.930088	1.03409	1.02574	1.00102	0.97224	0.981858	0.98504	0.960323	0.490335
645007947	PREDICTED: peptidyl-tRNA hydrolase 2, mitochondrial isoform X2 [Nasonia vitripennis]	17.5139	8.38232	7.55	2	1	0.929872	1.03911	0.990167	0.986384	0.996796	0.979564	1.08757	1.02131	1.03541	0.490397
645029589	PREDICTED: ATP-dependent Clp protease proteolytic subunit, mitochondrial [Nasonia vitripennis]	25.7295	7.84033	27.35	1	5	0.952452	1.06903	1.03524	1.01891	0.978994	0.991721	1.00534	0.992019	0.973611	0.490458
156541477	PREDICTED: phosphoenolpyruvate carboxykinase [GTP]-like [Nasonia vitripennis]	80.8802	8.67529	27.55	1	18	1.0884	0.977415	1.01458	1.0268	1.03485	0.994405	0.96324	0.997497	0.971464	0.490539
645016973	PREDICTED: LOW QUALITY PROTEIN: alanine--tRNA ligase, cytoplasmic [Nasonia vitripennis]	125.468	6.65381	22.86	1	21	0.950919	1.00049	1.0092	0.986869	0.968874	1.0178	1.03498	1.00722	1.02062	0.490906
299782463	dynactin subunit 2 [Nasonia vitripennis]	45.8664	5.24951	31.44	1	11	0.942239	1.06056	0.953382	0.985395	1.0431	1.01268	0.992276	1.01602	1.03108	0.49173
156549524	PREDICTED: adrenodoxin-like protein, mitochondrial [Nasonia vitripennis]	19.5427	5.97314	17.54	1	2	1.17708	0.960286	0.982956	1.04011	1.0504	0.916794	0.974384	0.980525	0.942716	0.492341
156548147	PREDICTED: poly(U)-specific endoribonuclease homolog [Nasonia vitripennis]	65.2172	6.48096	15.15	1	8	0.990046	1.02688	1.04129	1.0194	1.04954	0.985149	0.948203	0.994297	0.97537	0.492917
229577204	S-adenosylhomocysteine hydrolase [Nasonia vitripennis]	47.7614	6.53662	38.11	1	14	0.929705	1.04203	0.97986	0.983865	1.012	1.00719	1.00596	1.00839	1.02492	0.49302
645003207	PREDICTED: uncharacterized protein LOC100121224 isoform X10 [Nasonia vitripennis]	187.701	5.18604	1.28	10	1	0.955423	1.09018	0.82921	0.958271	0.956791	1.18846	0.970017	1.03842	1.08364	0.493154
645035514	PREDICTED: maestro heat-like repeat-containing protein family member 1 isoform X4 [Nasonia vitripennis]	175.723	6.12549	2.85	4	3	1.34403	0.920369	0.965348	1.07658	1.02782	1.00802	0.870358	0.96873	0.899821	0.493222
345487050	PREDICTED: nuclear pore complex protein Nup160 homolog [Nasonia vitripennis]	145.022	6.50732	1.42	1	2	1.41509	0.907418	0.916593	1.0797	1.00637	0.931845	0.917214	0.951809	0.88155	0.493653
288856257	NADH dehydrogenase [ubiquinone] iron-sulfur protein 8, mitochondrial [Nasonia vitripennis]	23.1083	6.66846	48.26	2	9	1.06034	0.904937	1.12936	1.03155	1.01393	0.915915	0.999902	0.976584	0.946718	0.493844
645039412	PREDICTED: protein LSM14 homolog A-like isoform X4 [Nasonia vitripennis]	71.0446	9.979	24.54	1	1	0.849173	1.07408	1.01045	0.9779	1.12951	1.02784	0.962813	1.04005	1.06356	0.49393
345498300	PREDICTED: AP-1 complex subunit mu-1 [Nasonia vitripennis]	48.4432	7.18115	5.21	1	2	1.16487	0.772015	1.35328	1.09672	0.986586	0.975443	0.940653	0.967561	0.882229	0.493933
156538621	PREDICTED: uncharacterized protein LOC100123845 [Nasonia vitripennis]	83.8367	8.44092	3.92	3	3	1.18628	0.813068	1.13133	1.04356	1.08318	0.885136	0.854051	0.940788	0.90152	0.493943
156553526	PREDICTED: acyl-CoA synthetase short-chain family member 3, mitochondrial [Nasonia vitripennis]	76.4789	6.91748	15.2	1	10	0.950352	1.02733	0.892567	0.95675	1.14393	0.947814	0.949647	1.0138	1.05962	0.493984
156541150	PREDICTED: 60S acidic ribosomal protein P2 [Nasonia vitripennis]	11.674	4.70361	61.06	1	5	0.836179	1.08339	0.982826	0.967465	0.995722	1.05765	1.01596	1.02311	1.05752	0.494198
645028905	PREDICTED: vacuolar protein sorting-associated protein 13B isoform X3 [Nasonia vitripennis]	421.106	5.80811	0.48	3	1	1.16769	0.905041	0.814414	0.962382	0.991673	1.11362	1.03386	1.04638	1.08729	0.494247
156548290	PREDICTED: cytochrome c [Nasonia vitripennis]	11.7551	9.53955	71.3	1	9	0.985403	0.954009	1.21215	1.05052	0.93964	0.98477	1.03409	0.986168	0.938741	0.494812
645039718	PREDICTED: protein transport protein Sec24A [Nasonia vitripennis]	136.498	8.35303	1.18	1	1	0.802141	1.07384	1.02296	0.966313	1.02454	1.02805	1.03397	1.02885	1.06472	0.495192
645002195	PREDICTED: translin [Nasonia vitripennis]	27.9665	6.62451	27.27	1	6	0.87563	1.04225	0.985845	0.967908	1.02575	0.988302	1.00236	1.00547	1.03881	0.495324
345486620	PREDICTED: transitional endoplasmic reticulum ATPase TER94 [Nasonia vitripennis]	88.7183	5.26221	56.05	1	35	0.914316	1.07788	0.963525	0.98524	1.00879	1.0405	1.01723	1.02217	1.03749	0.495984
645037205	PREDICTED: ubiquitin-conjugating enzyme E2 L3-like [Nasonia vitripennis]	18.2765	8.5874	33.54	1	4	1.05093	0.990003	0.998833	1.01326	0.974403	1.0351	0.965183	0.991563	0.978592	0.496368
156548825	PREDICTED: protein HGV2 [Nasonia vitripennis]	46.7121	4.38623	14.51	1	6	0.847751	1.07629	0.988799	0.970947	1.03701	1.00302	1.0236	1.02121	1.05177	0.496697
645005032	PREDICTED: vitellogenin receptor isoform X2 [Nasonia vitripennis]	196.359	5.43994	4.1	2	7	0.757418	1.10124	1.00693	0.955196	1.06404	1.01504	1.01887	1.03265	1.08109	0.496884
345498311	PREDICTED: circadian clock-controlled protein-like [Nasonia vitripennis]	27.3204	7.75244	39.75	1	8	0.871016	1.06862	0.981593	0.973743	0.936149	1.06082	1.08952	1.02883	1.05657	0.498331
345495690	PREDICTED: transcription initiation factor TFIID subunit 7 [Nasonia vitripennis]	46.367	4.88135	3.75	1	1	0.9403	0.985182	1.04207	0.989183	0.984358	1.0545	1.00872	1.01586	1.02697	0.498834
283046823	hexamerin 109 precursor [Nasonia vitripennis]	108.168	6.58057	31.72	1	18	1.03605	1.00494	0.848267	0.963085	0.88374	1.05014	1.19266	1.04218	1.08213	0.498965
345480026	PREDICTED: heat shock protein 68-like [Nasonia vitripennis]	73.2281	5.60498	23.03	1	2	1.53808	0.857623	0.971359	1.12236	1.1511	0.835857	0.86208	0.949678	0.846147	0.500504
156537474	PREDICTED: nuclear pore complex protein Nup93-like [Nasonia vitripennis]	91.4807	6.32861	18.05	1	11	1.06008	0.933865	1.05984	1.01793	0.975732	0.998717	0.984917	0.986455	0.969081	0.500645
645017769	PREDICTED: protein stoned-B [Nasonia vitripennis]	227.338	4.62744	7.08	1	10	1.14015	0.907336	1.02122	1.0229	0.970939	0.993371	0.953169	0.972493	0.950719	0.500907
645011738	PREDICTED: peptidyl-tRNA hydrolase 2, mitochondrial [Nasonia vitripennis]	13.3343	10.0083	23.2	1	2	0.922819	1.05762	0.951651	0.977363	1.01972	1.09928	0.946559	1.02185	1.04552	0.500935
645017001	PREDICTED: proton-coupled amino acid transporter 1-like [Nasonia vitripennis]	49.1769	9.05615	6.97	1	3	1.07646	0.917727	1.08406	1.02608	1.0294	0.949052	0.968167	0.982206	0.95724	0.501059
156542763	PREDICTED: cofilin/actin-depolymerizing factor homolog [Nasonia vitripennis]	16.8654	6.56592	58.11	1	9	0.988505	1.00668	0.993156	0.996112	0.983629	1.02116	1.0112	1.00533	1.00925	0.501094
644999098	PREDICTED: glycine--tRNA ligase isoform X2 [Nasonia vitripennis]	76.6543	6.52197	30.19	2	19	0.984541	1.02188	1.01707	1.00783	0.990377	0.993988	1.00995	0.998105	0.990348	0.501424
645005809	PREDICTED: bromodomain-containing protein 4A-like isoform X8 [Nasonia vitripennis]	167.591	9.46631	2.12	8	2	1.31295	0.921893	0.961385	1.06541	1.06419	0.982555	0.837613	0.961454	0.902428	0.501439
644999832	PREDICTED: intersectin-1 isoform X8 [Nasonia vitripennis]	197.216	5.71924	9.81	9	14	1.12522	0.942596	1.00832	1.02538	0.959495	1.01036	0.983666	0.984507	0.960139	0.501517
156542807	PREDICTED: importin-5 [Nasonia vitripennis]	122.767	4.7417	24	1	18	1.075	0.990164	0.969773	1.01165	0.994907	0.981516	0.986718	0.987714	0.976343	0.501792
156553206	PREDICTED: protein disulfide-isomerase A3 [Nasonia vitripennis]	56.0993	5.2876	44.18	1	21	0.916635	1.07757	0.962328	0.985512	0.993857	1.0448	1.02879	1.02248	1.03752	0.502212
645014489	PREDICTED: sugar transporter SWEET1 [Nasonia vitripennis]	23.6454	7.1958	10.6	1	1	1.13355	0.858291	0.925327	0.972389	0.978989	1.02355	1.11844	1.04032	1.06986	0.503466
289177024	microsomal gluathione S-transferase 1 [Nasonia vitripennis]	16.4619	9.64209	31.72	1	5	0.895563	1.06823	0.993781	0.985856	1.02419	0.975239	1.09042	1.02995	1.04473	0.503932
645037538	PREDICTED: brain mitochondrial carrier protein 1-like [Nasonia vitripennis]	67.9806	9.64209	3.55	1	2	1.00211	1.00377	0.97482	0.993565	0.963834	1.0333	1.04144	1.01286	1.01942	0.504662
197245424	acyl-Coenzyme A oxidase 3 [Nasonia vitripennis]	76.0765	7.76709	16.17	4	9	0.964905	1.06851	1.02728	1.02023	0.971118	1.00805	1.00996	0.996376	0.976618	0.505616
345485951	PREDICTED: arrestin domain-containing protein 2 [Nasonia vitripennis]	37.6388	8.48486	6.51	1	2	1.09746	0.999235	0.964275	1.02033	1.01406	0.993014	0.960086	0.989054	0.969351	0.505964
229576912	vesicle-trafficking protein SEC22b [Nasonia vitripennis]	24.7167	8.89502	32.39	1	6	0.906448	1.05091	0.946843	0.968065	0.986156	1.02602	0.99013	1.00077	1.03378	0.506363
645033767	PREDICTED: CCR4-NOT transcription complex subunit 2 isoform X2 [Nasonia vitripennis]	49.8453	6.55127	4.12	2	1	1.22192	0.915638	1.03098	1.05618	1.12281	0.92989	0.853907	0.968869	0.917332	0.506909
288856326	cytochrome c oxidase subunit 6B1 [Nasonia vitripennis]	9.80958	6.50732	64.2	1	5	0.837224	1.00013	1.06826	0.968541	1.01193	1.07293	0.981428	1.02209	1.05529	0.507304
645013228	PREDICTED: probable GPI-anchored adhesin-like protein PGA55 isoform X3 [Nasonia vitripennis]	125.957	7.91357	5.04	3	4	0.937106	1.04895	0.831802	0.939284	1.13509	0.995409	0.892612	1.0077	1.07284	0.507739
644998157	PREDICTED: LOW QUALITY PROTEIN: ribonucleoside-diphosphate reductase large subunit [Nasonia vitripennis]	91.1959	7.48877	8.41	1	6	0.902384	1.0783	0.919084	0.966588	1.0503	1.13453	0.905257	1.03003	1.06563	0.507784
645016999	PREDICTED: sensory neuron membrane protein 2 [Nasonia vitripennis]	47.4229	7.02002	8.39	1	3	1.2331	0.915147	0.992839	1.04703	1.03412	0.861453	1.00663	0.9674	0.923946	0.508
645030479	PREDICTED: serine protease nudel-like [Nasonia vitripennis]	120.414	5.61768	12.02	1	11	0.770471	1.11844	0.96321	0.950708	1.06739	1.11576	0.922129	1.03509	1.08876	0.508106
644999785	PREDICTED: 26S proteasome non-ATPase regulatory subunit 12 [Nasonia vitripennis]	52.005	6.01123	28.04	1	12	0.918872	1.06483	0.975064	0.986255	1.01369	1.03445	1.00507	1.01773	1.03192	0.508295
645020676	PREDICTED: actin-binding LIM protein 1-like isoform X5 [Nasonia vitripennis]	91.6665	8.6167	15.76	6	2	1.35218	0.918065	0.901231	1.05716	1.01498	0.912885	0.914074	0.947313	0.896095	0.508353
345481962	PREDICTED: nucleoporin NUP188 homolog [Nasonia vitripennis]	225.318	6.52197	1.71	1	3	1.26969	0.898294	1.0618	1.07659	0.991891	0.944156	1.05052	0.995521	0.924695	0.50844
345493508	PREDICTED: F-box-like/WD repeat-containing protein TBL1XR1 [Nasonia vitripennis]	55.8971	5.2876	3.73	1	1	1.20381	0.866125	1.07542	1.04845	1.02252	0.943152	0.959472	0.975048	0.929988	0.508959
156537109	PREDICTED: cytosolic 10-formyltetrahydrofolate dehydrogenase [Nasonia vitripennis]	98.7956	6.27783	6.65	1	4	0.977279	1.0178	0.953879	0.982984	0.982982	1.03353	0.986314	1.00094	1.01827	0.509082
345483614	PREDICTED: WD repeat and FYVE domain-containing protein 2 [Nasonia vitripennis]	45.9957	7.1958	9.07	1	3	1.23273	0.930473	0.980787	1.048	1.10932	0.914541	0.85838	0.960746	0.916746	0.509155
645016059	PREDICTED: transcription elongation factor B polypeptide 1 [Nasonia vitripennis]	13.3174	4.77979	16.53	1	1	1.10737	0.948551	1.0359	1.03061	0.998366	1.04583	0.919968	0.988056	0.958714	0.509242
156549300	PREDICTED: probable DNA mismatch repair protein Msh6 [Nasonia vitripennis]	129.657	6.80029	1.74	1	1	0.939067	1.06669	1.07521	1.02699	1.05803	0.974732	0.918213	0.983658	0.95781	0.509467
645039646	PREDICTED: eukaryotic translation initiation factor 3 subunit J [Nasonia vitripennis]	26.9754	4.91943	22.32	1	5	0.880418	1.06501	0.97047	0.971967	0.952669	1.07523	1.02678	1.01823	1.04759	0.510497
345480371	PREDICTED: N-alpha-acetyltransferase 25, NatB auxiliary subunit [Nasonia vitripennis]	103.731	7.43018	5.07	1	4	0.930704	1.07568	0.91744	0.974607	1.08098	0.947025	1.03457	1.02086	1.04746	0.510572
645030324	PREDICTED: uncharacterized protein LOC100115644 isoform X4 [Nasonia vitripennis]	210.909	6.11279	4.29	4	8	1.07232	0.982975	0.98023	1.01184	0.991208	0.975701	1.00124	0.989382	0.977805	0.510778
345491749	PREDICTED: melanotransferrin [Nasonia vitripennis]	93.7435	6.22705	4.57	1	4	1.11105	0.931031	1.02325	1.02177	0.970208	0.992298	0.98943	0.983979	0.963009	0.51087
645038059	PREDICTED: uncharacterized protein LOC100116976 [Nasonia vitripennis]	109.981	9.18799	4.59	1	4	1.00481	0.950008	1.02145	0.992089	0.983305	1.04471	1.00875	1.01225	1.02032	0.511043
645036292	PREDICTED: CLIP-associating protein 1 isoform X9 [Nasonia vitripennis]	137.172	9.08545	1.45	1	2	0.953118	0.93279	1.05054	0.978817	1.06381	0.91253	1.11182	1.02939	1.05166	0.511085
644995422	PREDICTED: putative protein FAM10A4 isoform X3 [Nasonia vitripennis]	40.103	5.021	31.07	3	10	0.906214	1.04937	1.01913	0.991571	0.990722	1.0315	1.05501	1.02575	1.03447	0.511131
156544005	PREDICTED: U6 snRNA-associated Sm-like protein LSm3 [Nasonia vitripennis]	11.8791	4.88135	20.39	1	2	1.65014	0.762871	0.947136	1.12005	1.05437	0.90536	0.794208	0.917979	0.819589	0.511334
334852207	putative lipoyltransferase 2, mitochondrial [Nasonia vitripennis]	28.0611	6.63916	24	1	5	1.10098	0.992823	0.956556	1.01679	1.01847	1.0059	0.903904	0.97609	0.959976	0.511526
645040965	PREDICTED: probable peroxisomal acyl-coenzyme A oxidase 1 [Nasonia vitripennis]	76.518	7.09326	35.04	1	21	1.04827	0.995052	0.980489	1.00794	1.00061	0.98534	0.992393	0.99278	0.984962	0.511649
645020954	PREDICTED: protein lunapark-B isoform X2 [Nasonia vitripennis]	45.7503	5.51611	25.12	2	8	1.05158	0.930509	0.95635	0.979481	1.10282	1.00481	0.953989	1.02054	1.04192	0.512032
345481080	PREDICTED: synapse-associated protein of 47 kDa isoform X2 [Nasonia vitripennis]	43.9575	4.61475	26.2	5	9	1.04819	0.959403	1.01331	1.00697	0.998738	0.966877	0.995569	0.987061	0.980231	0.512708
645028980	PREDICTED: flavin-containing monooxygenase FMO GS-OX-like 2 [Nasonia vitripennis]	53.8102	7.1665	6.83	1	3	0.897491	1.18048	1.05773	1.04524	0.909538	1.01168	1.02259	0.981269	0.938801	0.514251
645028886	PREDICTED: nucleoplasmin-like protein [Nasonia vitripennis]	12.9623	4.29736	29.06	1	3	0.927268	0.960323	1.0553	0.980962	0.988562	1.0471	0.998212	1.01129	1.03092	0.514271
345479585	PREDICTED: 40S ribosomal protein S7 isoform X2 [Nasonia vitripennis]	22.3232	9.84717	47.15	2	9	0.941071	1.0672	0.992098	1.00012	0.994514	1.06543	1.03034	1.03009	1.02997	0.514559
644991747	PREDICTED: vacuolar protein sorting-associated protein 13C isoform X5 [Nasonia vitripennis]	368.496	6.30322	7.86	5	17	1.10981	0.968144	1.00576	1.02791	1.00416	0.994587	0.993942	0.997562	0.970479	0.51465
345483528	PREDICTED: dehydrogenase/reductase SDR family member on chromosome X-like [Nasonia vitripennis]	42.7726	9.27588	23	1	7	0.98655	1.02073	1.01982	1.00903	1.01889	0.956288	1.00472	0.993299	0.984407	0.514705
644991524	PREDICTED: excitatory amino acid transporter-like [Nasonia vitripennis]	59.9842	7.02002	5.7	1	2	1.26513	0.845673	1.06233	1.05771	1.04476	0.926343	0.929928	0.967012	0.914248	0.515201
645002542	PREDICTED: translational activator GCN1 [Nasonia vitripennis]	286.974	7.02002	17.04	1	37	1.03474	1.00082	0.958965	0.998175	1.01411	0.997881	1.03462	1.01554	1.01739	0.515349
645003295	PREDICTED: stress-activated protein kinase JNK [Nasonia vitripennis]	44.6623	6.53662	9.23	1	2	1.3535	0.879044	0.975549	1.06936	1.0518	0.795056	1.0088	0.951885	0.890142	0.516064
156537127	PREDICTED: CCAAT/enhancer-binding protein zeta [Nasonia vitripennis]	102.833	5.93506	2.88	1	2	1.09374	1.00032	0.980399	1.02482	1.03087	1.02173	0.910716	0.987771	0.963848	0.516106
645010008	PREDICTED: RIMS-binding protein 2 [Nasonia vitripennis]	129.96	6.75635	2.45	1	2	1.27724	0.994824	0.894504	1.05552	1.08851	0.92395	0.872901	0.961787	0.911194	0.51611
156554116	PREDICTED: probable protein disulfide-isomerase A6 [Nasonia vitripennis]	47.8691	5.23682	42.11	1	16	0.937033	1.07731	0.915471	0.976604	0.994872	1.04882	1.00036	1.01468	1.03899	0.516304
156550155	PREDICTED: glutamine--fructose-6-phosphate aminotransferase [isomerizing] 2 isoform X4 [Nasonia vitripennis]	76.1159	6.62451	3.25	4	2	1.13261	1.00701	0.962563	1.03406	0.962548	0.908867	1.07863	0.983349	0.950957	0.516924
289684235	cuticular protein RR-1 family member 22 precursor [Nasonia vitripennis]	18.393	5.84619	24.54	1	3	0.998027	0.985794	1.05655	1.01346	1.02546	0.959802	0.993567	0.992944	0.97976	0.517236
156546398	PREDICTED: uncharacterized protein LOC100123404 [Nasonia vitripennis]	27.1392	5.87158	18.15	1	4	1.09506	1.0257	0.935122	1.01863	0.933899	1.01648	0.993879	0.98142	0.963472	0.517257
229577119	casein kinase II alpha subunit [Nasonia vitripennis]	41.6381	7.6792	29.43	1	8	0.989736	1.00647	1.04352	1.01324	1.00373	0.993654	1.00743	1.0016	0.988516	0.517502
644996748	PREDICTED: 1-phosphatidylinositol 4,5-bisphosphate phosphodiesterase-like isoform X4 [Nasonia vitripennis]	126.44	6.60986	1.46	4	1	1.02055	1.00081	0.958621	0.993327	0.981942	1.05964	1.00135	1.01431	1.02112	0.518084
345490781	PREDICTED: alpha-glucosidase isoform X2 [Nasonia vitripennis]	71.2101	5.79541	12.05	2	7	0.956002	1.03042	1.05592	1.01412	0.955864	0.997536	1.01524	0.989546	0.975772	0.51865
645013939	PREDICTED: venom acid phosphatase Acph-1-like [Nasonia vitripennis]	43.7182	7.06396	20.58	3	6	0.918449	1.01303	0.990714	0.974066	0.975397	1.0415	0.980621	0.999174	1.02578	0.519168
345479804	PREDICTED: histone H1-II-like [Nasonia vitripennis]	16.9198	10.9312	26.38	1	2	0.772947	0.737305	1.28239	0.93088	1.00126	1.17169	1.01045	1.06113	1.13993	0.519251
645041793	PREDICTED: protein purity of essence-like, partial [Nasonia vitripennis]	141.169	6.0874	5.21	1	4	1.14369	0.917994	1.0725	1.04473	1.04288	0.981648	0.959519	0.994682	0.952095	0.520472
645033534	PREDICTED: uncharacterized protein LOC100123377 [Nasonia vitripennis]	82.4201	8.70459	5.09	1	3	1.66666	0.844064	0.886708	1.13248	0.965175	0.942047	0.925362	0.944195	0.833743	0.520518
644998552	PREDICTED: ATP-dependent (S)-NAD(P)H-hydrate dehydratase isoform X2 [Nasonia vitripennis]	32.817	7.66455	14.38	2	4	1.00406	1.0745	0.972129	1.01689	1.02707	0.967723	0.981956	0.992251	0.975767	0.521744
156549802	PREDICTED: nuclear pore glycoprotein p62-like [Nasonia vitripennis]	38.5791	4.90674	13.77	1	4	1.32398	0.907068	0.958998	1.06335	1.05333	0.939959	0.90611	0.966467	0.908889	0.522842
645014939	PREDICTED: uncharacterized protein LOC100120150 [Nasonia vitripennis]	41.7821	6.40479	2.67	1	1	1.08806	1.05065	0.946524	1.02841	1.03195	0.91972	1.0181	0.989925	0.962578	0.523695
645005372	PREDICTED: eukaryotic translation initiation factor 3 subunit K [Nasonia vitripennis]	25.2578	5.03369	30.59	1	5	0.890526	1.01186	0.981763	0.961385	1.02941	0.911366	1.06818	1.00299	1.04327	0.523754
156547942	PREDICTED: pentatricopeptide repeat-containing protein 2, mitochondrial-like [Nasonia vitripennis]	46.4548	8.70459	36.68	1	14	0.97403	1.09317	0.899759	0.988986	1.03419	1.0582	0.998031	1.03014	1.04161	0.523795
283135224	casein kinase 1 alpha 1-like protein [Nasonia vitripennis]	39.5823	9.51025	18.5	3	6	1.05292	0.926697	0.952419	0.977344	1.04869	0.971735	1.00472	1.00838	1.03176	0.523848
645002097	PREDICTED: fatty acid-binding protein, brain-like [Nasonia vitripennis]	15.953	5.60498	52.17	1	5	1.00612	0.844304	1.06094	0.970452	0.998228	1.08408	0.980671	1.02099	1.05208	0.523881
238859547	major royal jelly protein-like 9 precursor [Nasonia vitripennis]	48.2923	5.79541	13.58	1	6	0.785113	0.849804	1.20527	0.946728	1.02972	1.01626	1.06915	1.03838	1.09681	0.524427
644999914	PREDICTED: mitochondrial glutamate carrier 1-like [Nasonia vitripennis]	33.9319	9.43701	23.82	1	7	0.991136	1.03373	0.946661	0.990509	1.00256	0.999843	1.02393	1.00878	1.01844	0.525008
156547285	PREDICTED: serine/threonine-protein phosphatase 4 catalytic subunit [Nasonia vitripennis]	34.9773	5.10986	12.38	1	2	1.33581	0.86718	0.991519	1.06484	1.04261	0.958293	0.886867	0.96259	0.90398	0.525566
345481609	PREDICTED: calcium-binding mitochondrial carrier protein Aralar1 isoform X3 [Nasonia vitripennis]	75.0223	8.27979	28.08	3	16	0.959046	0.972795	1.02885	0.986897	1.02203	0.969322	1.02853	1.00663	1.01999	0.525614
645031732	PREDICTED: Z band alternatively spliced PDZ-motif protein 66 isoform X1 [Nasonia vitripennis]	36.3329	8.98291	62.85	2	9	0.995623	0.953635	0.990994	0.980084	1.02303	0.984325	0.974387	0.993914	1.01411	0.525743
645023161	PREDICTED: GTP-binding protein Rheb homolog [Nasonia vitripennis]	20.4464	5.22412	24.18	1	4	1.0387	1.01163	1.02848	1.02627	0.979333	0.958162	1.06881	1.0021	0.97645	0.52575
288869496	cuticular protein analogous to peritrophins 3-A1 precursor [Nasonia vitripennis]	25.864	5.03369	13.25	1	3	1.09196	1.08204	0.939203	1.03773	0.95155	0.958852	1.07191	0.994103	0.957957	0.52592
645014726	PREDICTED: eye-specific diacylglycerol kinase [Nasonia vitripennis]	153.182	6.68311	0.93	1	1	1.14349	1.16929	0.917712	1.07683	1.27567	0.813535	0.763564	0.950924	0.883076	0.526145
345493584	PREDICTED: LOW QUALITY PROTEIN: collagen alpha-1(IV) chain [Nasonia vitripennis]	187.652	6.06201	3.4	1	6	0.905842	1.06789	0.911967	0.961899	0.944955	1.16545	0.95988	1.02343	1.06397	0.526183
156545850	PREDICTED: alpha-tocopherol transfer protein-like [Nasonia vitripennis]	34.6305	6.62451	18.6	1	5	0.97966	0.823217	1.35199	1.05162	0.880511	1.02433	0.912127	0.938989	0.892896	0.527054
645000182	PREDICTED: ribose-5-phosphate isomerase [Nasonia vitripennis]	32.0539	8.04541	11.56	2	2	0.991188	1.16462	0.961458	1.03909	1.18688	0.816338	0.830106	0.944441	0.908912	0.527171
345482402	PREDICTED: putative pre-mRNA-splicing factor ATP-dependent RNA helicase DHX15 [Nasonia vitripennis]	117.733	6.25244	6.15	1	6	1.11819	0.96168	0.985481	1.02178	1.01585	0.986663	0.955673	0.986063	0.965041	0.527598
345481621	PREDICTED: protein transport protein Sec24C-like isoform X2 [Nasonia vitripennis]	133.754	6.69775	8.48	2	7	1.01124	0.958617	1.00514	0.991666	1.07334	0.979735	0.991859	1.01498	1.02351	0.527886
156544942	PREDICTED: superoxide dismutase [Mn], mitochondrial [Nasonia vitripennis]	24.4765	8.73389	23.64	1	6	0.950094	0.965264	1.19044	1.03527	0.973844	0.967123	1.00243	0.981132	0.94771	0.528166
645008933	PREDICTED: probable galactose-1-phosphate uridylyltransferase [Nasonia vitripennis]	42.247	6.94678	24.52	1	8	0.962252	0.982282	1.03954	0.99469	1.01732	0.97617	1.05983	1.01777	1.0232	0.528235
156546898	PREDICTED: 40S ribosomal protein S15 [Nasonia vitripennis]	16.9241	10.2866	44.9	1	5	0.995714	0.992571	1.01661	1.00163	0.976732	1.02641	1.04822	1.01712	1.01547	0.528279
645041545	PREDICTED: V-type proton ATPase subunit S1-like [Nasonia vitripennis]	17.1899	6.55127	9.27	1	2	0.887311	1.05322	1.0251	0.988542	1.00814	1.05961	1.00956	1.02577	1.03766	0.528343
644996084	PREDICTED: ADP-ribosylation factor GTPase-activating protein 1 isoform X4 [Nasonia vitripennis]	32.9426	5.32568	5.96	1	1	0.958103	1.08115	1.01634	1.01853	0.944954	1.01811	1.00548	0.989515	0.97151	0.528589
156540059	PREDICTED: uncharacterized protein LOC100114674, partial [Nasonia vitripennis]	80.9799	9.39307	9.71	1	6	0.948145	0.964716	1.14704	1.01997	0.95513	0.931944	1.02812	0.971731	0.952707	0.528627
645019001	PREDICTED: wolframin isoform X2 [Nasonia vitripennis]	97.2901	7.53271	1.16	2	1	1.46319	0.838036	0.966097	1.08911	1.08068	0.857139	0.911706	0.949841	0.872126	0.528813
645020169	PREDICTED: ABC transporter G family member 23 isoform X2 [Nasonia vitripennis]	83.7611	7.03467	14.51	2	8	0.993503	1.05174	0.988335	1.01119	1.00371	1.00561	0.978556	0.995957	0.984934	0.528832
645006026	PREDICTED: importin subunit alpha [Nasonia vitripennis]	56.8435	5.16064	23.27	1	7	0.791408	1.09514	0.977052	0.954532	1.03217	1.04794	0.972255	1.01745	1.06592	0.528852
345493014	PREDICTED: bifunctional protein NCOAT isoform X2 [Nasonia vitripennis]	103.69	5.21143	5.13	2	3	1.02894	0.945195	0.9754	0.983177	0.99443	1.01112	0.995695	1.00041	1.01753	0.529452
645002685	PREDICTED: translocation protein SEC63 homolog [Nasonia vitripennis]	88.5676	6.27783	7.64	1	5	1.08893	1.02487	0.946949	1.02025	0.947824	1.03524	0.977889	0.986983	0.967394	0.529669
345479172	PREDICTED: chromobox protein homolog 1-like [Nasonia vitripennis]	21.2655	5.35107	28.65	1	4	1.27939	0.889696	0.97433	1.04781	1.00363	0.998804	0.884112	0.962183	0.918283	0.529807
645037639	PREDICTED: flotillin-2 [Nasonia vitripennis]	46.1131	5.51611	38.44	1	14	1.03621	0.973542	1.00239	1.00405	1.01102	0.992907	0.959727	0.987885	0.983904	0.529873
238908534	venom protein L precursor [Nasonia vitripennis]	13.2347	5.99854	32.48	1	5	0.680076	0.887871	1.25959	0.942512	1.02541	1.07326	1.07989	1.05952	1.12415	0.529962
645018314	PREDICTED: uncharacterized protein LOC100116356, partial [Nasonia vitripennis]	128.283	9.90576	5.66	1	4	0.957114	1.04261	0.931688	0.977136	0.962455	1.01133	1.04141	1.00507	1.02859	0.530051
345489972	PREDICTED: STAM-binding protein-like A [Nasonia vitripennis]	47.7924	7.29834	3.86	1	1	0.790145	0.939124	1.10536	0.944876	1.00792	1.09194	0.942173	1.01401	1.07317	0.530605
645007096	PREDICTED: short chain dehydrogenase isoform X2 [Nasonia vitripennis]	33.0907	8.76318	19.79	2	5	0.855966	0.924021	1.1375	0.972495	1.04228	0.995219	1.05863	1.03204	1.06123	0.53089
645028505	PREDICTED: 1,5-anhydro-D-fructose reductase-like isoform X2 [Nasonia vitripennis]	37.4024	8.26514	60.12	2	17	0.901919	1.00058	1.19859	1.0337	0.903057	0.989765	1.01579	0.969539	0.937934	0.530932
345480227	PREDICTED: LOW QUALITY PROTEIN: cell division control protein 45 homolog [Nasonia vitripennis]	64.4596	5.42725	2.49	1	1	1.14803	0.959362	1.00158	1.03632	1.08923	0.906535	0.950366	0.982042	0.947621	0.531624
156543734	PREDICTED: 60S ribosomal protein L14 [Nasonia vitripennis]	18.0581	10.7114	48.08	1	9	0.907732	1.03688	0.996123	0.980244	0.980523	1.05215	0.997873	1.01018	1.03054	0.531794
645042353	PREDICTED: dynein heavy chain, cytoplasmic-like [Nasonia vitripennis]	64.9453	6.1001	15.1	1	6	1.00226	1.02585	1.00727	1.01179	1.02234	1.0025	0.983074	1.00264	0.99095	0.53234
345481741	PREDICTED: uncharacterized protein LOC100678142 [Nasonia vitripennis]	27.512	7.50342	9.27	1	3	0.606119	1.15902	1.02767	0.930936	1.07807	1.01434	1.0438	1.0454	1.12296	0.53257
645015514	PREDICTED: gem-associated protein 5 isoform X2 [Nasonia vitripennis]	134.827	6.59521	2.91	2	2	1.05248	0.903667	1.12655	1.02757	1.03673	0.961975	0.936521	0.978407	0.952161	0.532823
345498146	PREDICTED: uncharacterized protein LOC100679743 [Nasonia vitripennis]	15.9388	5.78271	20.42	1	3	1.02493	1.12316	0.891732	1.01327	1.01108	0.961908	0.919479	0.964157	0.951526	0.533095
156543860	PREDICTED: trafficking protein particle complex subunit 4 [Nasonia vitripennis]	24.5155	5.42725	7.83	1	1	0.978297	1.0273	1.03614	1.01391	0.953785	1.02193	1.00964	0.995118	0.981463	0.533677
645029011	PREDICTED: eukaryotic translation initiation factor 3 subunit E, partial [Nasonia vitripennis]	52.7609	6.59521	23.09	1	10	0.959727	1.01448	1.01729	0.997167	1.0059	1.03914	0.99366	1.0129	1.01578	0.533973
645020773	PREDICTED: group XV phospholipase A2-like isoform X2 [Nasonia vitripennis]	43.9066	7.79639	6.48	2	2	0.973984	1.10413	0.96437	1.01416	0.974481	0.978258	0.996784	0.983175	0.969446	0.534041
644991562	PREDICTED: lysophospholipid acyltransferase 7 isoform X2 [Nasonia vitripennis]	51.4655	8.79248	1.99	2	1	0.938361	1.13519	1.01511	1.02955	0.969739	0.925173	1.05394	0.982951	0.954735	0.534209
345497097	PREDICTED: very long-chain specific acyl-CoA dehydrogenase, mitochondrial [Nasonia vitripennis]	68.9181	7.81104	45.5	1	23	0.964053	1.03804	1.03306	1.01172	1.00669	0.998997	0.977718	0.994467	0.982946	0.534239
345490930	PREDICTED: putative RNA-binding protein 15 isoform X2 [Nasonia vitripennis]	83.8057	9.45166	5	2	3	1.01854	1.04661	0.981339	1.01549	1.01389	1.02309	0.947733	0.994902	0.979723	0.534593
213972539	S phase kinase associated protein 1 [Nasonia vitripennis]	18.7722	4.4751	25.15	1	4	0.830421	1.07377	0.991029	0.965072	0.95361	1.12864	0.993744	1.02533	1.06244	0.535117
645006756	PREDICTED: ER membrane protein complex subunit 1 [Nasonia vitripennis]	103.812	8.38232	10.81	1	7	0.924704	1.01215	1.00368	0.980179	0.971978	1.03801	0.999162	1.00305	1.02333	0.535755
645011318	PREDICTED: ataxin-2 homolog [Nasonia vitripennis]	89.9204	7.92822	2.2	1	2	0.835625	1.09034	0.991784	0.972583	1.03087	1.063	0.981736	1.0252	1.0541	0.536052
156538144	PREDICTED: translocon-associated protein subunit delta [Nasonia vitripennis]	18.1324	7.89893	26.63	1	5	0.841381	1.07901	0.969908	0.963433	0.932877	1.08976	1.03488	1.01917	1.05785	0.536969
645021600	PREDICTED: glycylpeptide N-tetradecanoyltransferase [Nasonia vitripennis]	58.348	8.1626	10.41	1	5	0.974215	1.07387	0.936357	0.994813	1.02787	1.0157	1.02409	1.02255	1.02789	0.537345
156552854	PREDICTED: serine protease easter [Nasonia vitripennis]	54.8513	6.66846	5.58	1	2	0.677285	0.705308	1.27942	0.887337	0.851457	1.29517	0.992144	1.04626	1.1791	0.537398
345491753	PREDICTED: interleukin enhancer-binding factor 2 isoform X2 [Nasonia vitripennis]	42.1629	7.56201	19.69	2	6	1.03498	1.02807	0.966636	1.0099	0.985226	1.02475	0.962436	0.990804	0.981095	0.537463
156550408	PREDICTED: transketolase isoform X1 [Nasonia vitripennis]	67.8821	7.43018	55.66	1	2	0.939138	1.02087	0.993063	0.984359	1.00066	1.10001	0.9526	1.01776	1.03393	0.537556
345494209	PREDICTED: N-acetylneuraminate lyase-like [Nasonia vitripennis]	36.817	7.84033	3.54	1	1	1.07821	0.925998	0.958228	0.987478	1.03544	1.05547	0.976553	1.02249	1.03545	0.537787
156541996	PREDICTED: prostaglandin E synthase 3 isoform X2 [Nasonia vitripennis]	20.0815	4.53857	17.42	2	4	0.938125	1.01835	0.973852	0.976777	0.971534	1.04848	0.978521	0.999511	1.02327	0.537996
156540365	PREDICTED: probable pyruvate dehydrogenase E1 component subunit alpha, mitochondrial [Nasonia vitripennis]	19.6336	5.98584	44.07	1	8	0.973781	0.991415	1.05395	1.00638	1.01177	0.962082	0.988328	0.987393	0.981131	0.538172
645014254	PREDICTED: rab proteins geranylgeranyltransferase component A 1 isoform X2 [Nasonia vitripennis]	66.1188	5.04639	16.02	2	9	1.06133	1.07163	0.931305	1.02142	0.989125	0.99792	0.985988	0.991011	0.970227	0.538769
645000754	PREDICTED: 39S ribosomal protein L3, mitochondrial [Nasonia vitripennis]	42.6483	9.53955	5.87	1	2	0.940081	1.09646	0.903365	0.979968	0.983607	1.06714	1.01791	1.02288	1.04379	0.539065
345490731	PREDICTED: ADP-dependent glucokinase [Nasonia vitripennis]	45.1212	7.7085	2.23	1	1	1.8607	0.751906	0.843135	1.15191	1.06472	0.797443	0.860291	0.907483	0.787805	0.539121
156538313	PREDICTED: apolipophorins [Nasonia vitripennis]	374.569	8.47021	64.61	4	203	0.99102	1.02337	1.01262	1.009	1.00065	1.01978	0.973447	0.997959	0.989055	0.539186
156554552	PREDICTED: uncharacterized protein LOC100121961 [Nasonia vitripennis]	33.9116	7.73779	30.87	1	7	0.992775	1.00557	0.981235	0.993194	0.972279	1.02973	1.01499	1.00567	1.01256	0.539339
288856291	NADH dehydrogenase [ubiquinone] 1 alpha subcomplex subunit 13 [Nasonia vitripennis]	18.1311	8.98291	39.47	1	7	0.968678	0.996393	1.07036	1.01181	0.993509	1.00535	0.972579	0.990481	0.978918	0.539418
645021027	PREDICTED: mitochondrial import inner membrane translocase subunit Tim9 [Nasonia vitripennis]	10.324	6.58057	37.93	1	2	0.947704	1.09603	1.0319	1.02521	0.982179	1.012	0.99337	0.99585	0.971363	0.539554
345489710	PREDICTED: uncharacterized protein LOC100116280 [Nasonia vitripennis]	46.866	6.03662	3.19	1	1	1.20205	0.906538	1.01481	1.04113	1.0325	0.959592	0.950469	0.980854	0.942104	0.540271
645033849	PREDICTED: tyrosine--tRNA ligase, cytoplasmic [Nasonia vitripennis]	58.2637	6.50732	45.99	2	19	0.927615	1.05029	0.972	0.983301	0.983023	1.04621	1.00181	1.01035	1.02751	0.540429
645028415	PREDICTED: annexin B9-like [Nasonia vitripennis]	35.8108	4.83057	67.49	1	18	1.04693	0.990956	0.994772	1.01089	0.99155	1.00716	0.996597	0.998437	0.987685	0.540626
645020183	PREDICTED: ABC transporter G family member 20 isoform X2 [Nasonia vitripennis]	78.9258	6.53662	2.23	2	1	0.928537	1.06906	0.946302	0.9813	0.955318	1.09009	1.01647	1.02063	1.04008	0.540918
645001084	PREDICTED: uncharacterized protein LOC100115922 isoform X4 [Nasonia vitripennis]	228.06	7.75244	40.34	6	74	0.99872	1.03134	0.998785	1.00962	1.04075	0.968367	0.966003	0.991707	0.982262	0.540995
644996432	PREDICTED: speckle-type POZ protein A-like isoform X2 [Nasonia vitripennis]	22.1246	5.93506	16.84	2	2	0.817465	1.09696	0.962534	0.958986	0.989885	1.07735	0.982177	1.01647	1.05994	0.541705
156547025	PREDICTED: cytochrome b reductase 1 isoform X3 [Nasonia vitripennis]	28.303	8.27979	5.14	3	1	1.11986	0.957545	0.990989	1.0228	1.02434	0.973985	0.964469	0.987598	0.965584	0.541852
645001827	PREDICTED: RNA-binding protein 25 [Nasonia vitripennis]	110.836	7.02002	2.64	1	2	1.06006	0.991229	0.961997	1.00443	1.0012	1.01742	0.902281	0.973632	0.969339	0.541979
156542275	PREDICTED: uncharacterized protein LOC100113624 [Nasonia vitripennis]	14.3811	5.31299	14.06	1	2	0.934004	0.928827	1.26225	1.04169	0.960002	1.03338	0.898065	0.963817	0.92524	0.542133
345496318	PREDICTED: kynurenine formamidase [Nasonia vitripennis]	33.8395	6.22705	23.92	1	5	1.10643	1.01042	0.973525	1.03012	0.986638	0.973215	1.04122	1.00036	0.971105	0.542232
345481999	PREDICTED: uncharacterized protein LOC100677986 [Nasonia vitripennis]	17.3052	9.21729	15.72	1	2	1.24388	0.977364	0.941207	1.05415	1.00734	1.06638	0.863539	0.979086	0.928793	0.542356
156553729	PREDICTED: superkiller viralicidic activity 2-like 2 [Nasonia vitripennis]	114.25	5.77002	3.3	1	2	1.29702	0.809383	1.1225	1.0763	0.989439	0.93537	1.01565	0.980151	0.910665	0.542453
645042288	PREDICTED: UPF0047 protein C4A8.02c, partial [Nasonia vitripennis]	14.4271	5.66846	18.8	1	2	1.1002	0.97224	1.03217	1.03487	0.994982	1.05655	0.960446	1.00399	0.970162	0.542457
156555917	PREDICTED: pupal cuticle protein-like [Nasonia vitripennis]	15.8909	6.03662	30.57	2	4	0.964661	1.02416	1.04186	1.01023	1.02428	1.00793	0.917495	0.983235	0.973283	0.542499
645025808	PREDICTED: TPPP family protein CG45057 [Nasonia vitripennis]	22.7006	9.5542	12.68	1	4	1.03543	0.99737	1.02823	1.02034	0.997397	0.951638	1.05046	0.999832	0.9799	0.542512
644996652	PREDICTED: glycine dehydrogenase (decarboxylating), mitochondrial [Nasonia vitripennis]	89.1512	6.84424	20.28	1	13	1.11015	0.958326	0.982912	1.01713	1.06864	0.904768	0.941765	0.971723	0.95536	0.542992
645005672	PREDICTED: large proline-rich protein BAG6 isoform X4 [Nasonia vitripennis]	129.493	6.39209	8.12	6	8	1.02732	0.913552	0.998707	0.979859	0.974526	0.974267	1.09666	1.01515	1.03602	0.543234
645001575	PREDICTED: long-chain fatty acid transport protein 4-like [Nasonia vitripennis]	72.3137	8.41162	17.1	1	9	0.93649	1.03755	1.05561	1.00988	0.979505	0.995054	0.980715	0.985091	0.975453	0.543679
645025482	PREDICTED: U4/U6 small nuclear ribonucleoprotein Prp31 isoform X3 [Nasonia vitripennis]	47.9084	9.51025	2.31	2	1	1.56141	0.809158	0.920685	1.09709	0.97707	0.975688	0.867618	0.940125	0.85693	0.544282
283135220	actin related protein 2/3 complex, subunit 4, 20kDa [Nasonia vitripennis]	19.7142	8.86572	22.62	2	4	1.10617	0.965544	0.997467	1.02306	1.03481	0.985745	0.951504	0.990685	0.968355	0.544522
645000353	PREDICTED: actin-related protein 3 [Nasonia vitripennis]	46.5526	6.0874	6.73	1	3	0.989635	0.991865	1.00443	0.995311	1.03089	0.996177	0.986932	1.00467	1.0094	0.544679
645001761	PREDICTED: LOW QUALITY PROTEIN: inner nuclear membrane protein Man1 [Nasonia vitripennis]	93.998	8.646	12.88	1	7	1.05746	0.971608	0.979522	1.00286	1.03426	1.03868	0.996124	1.02302	1.0201	0.545339
289177016	glutathione S-transferase T2 [Nasonia vitripennis]	26.4515	7.89893	72.25	1	15	0.899022	1.01453	1.01116	0.974905	0.941855	1.0352	1.04771	1.00826	1.03421	0.545499
645026801	PREDICTED: dystonin isoform X5 [Nasonia vitripennis]	627.736	6.62451	39.26	3	1	1.16184	0.958353	0.978994	1.03306	1.03627	0.950112	0.975225	0.987201	0.955605	0.54561
345491545	PREDICTED: ceramide-1-phosphate transfer protein [Nasonia vitripennis]	24.6855	6.44287	18.01	1	3	1.12115	0.950995	1.07639	1.04951	1.04619	0.993388	1.00322	1.01427	0.966417	0.545616
645005534	PREDICTED: ralBP1-associated Eps domain-containing protein 2 isoform X2 [Nasonia vitripennis]	73.6365	5.57959	2.64	2	1	0.946868	0.742876	1.15194	0.947227	0.846495	1.07839	1.24211	1.05566	1.11448	0.546187
645018820	PREDICTED: programmed cell death 6-interacting protein-like isoform X2 [Nasonia vitripennis]	15.7391	9.21729	8.03	2	1	0.987161	1.00248	0.984776	0.991471	0.952362	1.06241	1.02422	1.013	1.02171	0.546674
645020324	PREDICTED: vam6/Vps39-like protein [Nasonia vitripennis]	104.45	6.78564	3.3	1	2	0.98618	0.853722	1.05214	0.964014	0.906726	1.03322	1.1198	1.01992	1.05799	0.546835
645000995	PREDICTED: heat shock protein 68-like [Nasonia vitripennis]	73.1131	5.93506	18.73	1	1	1.86469	0.763891	0.832371	1.15365	1.15556	0.803042	0.758786	0.905798	0.785157	0.547364
645003142	PREDICTED: 60S ribosomal protein L3 [Nasonia vitripennis]	45.9455	10.1548	45.07	1	16	0.943392	1.03954	1.0001	0.994344	0.986655	1.0277	1.03027	1.01488	1.02065	0.547398
645033511	PREDICTED: ataxin-10 [Nasonia vitripennis]	55.9258	5.46533	13.03	5	4	1.00027	1.04189	0.972008	1.00472	1.00587	1.09481	0.989323	1.03	1.02516	0.547599
345495209	PREDICTED: methylcrotonoyl-CoA carboxylase beta chain, mitochondrial [Nasonia vitripennis]	61.0906	8.39697	11.63	1	4	1.20842	0.918507	0.991825	1.03958	1.01872	1.00636	0.909358	0.978145	0.9409	0.547605
345488636	PREDICTED: trypsin-7 [Nasonia vitripennis]	26.6884	6.91748	33.07	2	2	1.26774	1.01312	0.893459	1.05811	0.771413	1.04111	1.0741	0.96221	0.909371	0.54766
156548238	PREDICTED: angiotensin-converting enzyme [Nasonia vitripennis]	90.7854	6.12549	6.18	1	3	1.2383	0.859104	1.04912	1.04884	1.06402	0.923673	0.92488	0.970857	0.925645	0.547907
345490237	PREDICTED: probable phosphorylase b kinase regulatory subunit alpha isoform X4 [Nasonia vitripennis]	134.42	6.62451	11.11	5	10	1.08318	0.948014	1.02597	1.01905	0.998523	0.987188	0.994174	0.993295	0.974722	0.548049
156545100	PREDICTED: CD63 antigen-like isoform X2 [Nasonia vitripennis]	26.3925	7.69385	20	2	5	1.10642	0.909313	1.0963	1.03734	0.991714	1.01259	0.98053	0.994944	0.959126	0.548424
289684229	cuticular protein RR-1 family member 18 precursor [Nasonia vitripennis]	17.7511	5.33838	9.32	1	2	0.965284	1.04433	0.91655	0.975388	0.920542	1.21493	0.981385	1.03895	1.06517	0.54861
645013639	PREDICTED: alpha-amylase-like isoform X2 [Nasonia vitripennis]	59.0619	5.79541	28.89	4	8	1.06958	0.798818	1.26726	1.04522	1.0338	0.79665	1.00151	0.943988	0.903147	0.548717
156553332	PREDICTED: probable histone-binding protein Caf1 isoform X1 [Nasonia vitripennis]	48.8467	4.99561	11.14	2	4	0.90057	0.993166	1.04912	0.980952	1.05502	0.97469	1.00957	1.01309	1.03277	0.548937
645040498	PREDICTED: uncharacterized protein K02A2.6-like [Nasonia vitripennis]	37.4095	6.87354	2.15	1	1	0.871473	1.05249	1.01917	0.981044	0.983062	0.998301	1.08839	1.02325	1.04302	0.549224
645000074	PREDICTED: MAGUK p55 subfamily member 7 isoform X3 [Nasonia vitripennis]	62.802	5.23682	15.4	3	6	1.05492	0.979942	1.01257	1.01581	0.987899	0.981149	1.02747	0.998841	0.983292	0.550618
156543292	PREDICTED: flavin reductase (NADPH) [Nasonia vitripennis]	22.3226	6.94678	36.63	1	7	0.964148	1.03377	1.01456	1.00416	0.999053	1.02283	1.03631	1.0194	1.01517	0.551174
645014379	PREDICTED: uncharacterized protein LOC100118209 isoform X3 [Nasonia vitripennis]	206.23	4.51318	41.68	2	1	1.21876	0.93263	0.990863	1.04742	1.03126	0.856459	1.04687	0.978196	0.933911	0.551237
645005875	PREDICTED: prostaglandin reductase 1-like [Nasonia vitripennis]	40.2518	8.57275	11.72	1	3	0.919784	0.941485	1.03997	0.967079	1.07022	0.972933	0.95767	1.00027	1.03432	0.551278
645001163	PREDICTED: glutaredoxin-C4-like isoform X2 [Nasonia vitripennis]	10.9798	5.60498	59.18	2	7	0.968016	0.970209	1.03091	0.98971	0.962579	1.01207	1.06447	1.01304	1.02357	0.551406
645013702	PREDICTED: clathrin light chain [Nasonia vitripennis]	23.4327	4.81787	37.2	1	6	1.02048	0.92591	0.973377	0.973255	1.04862	0.930503	1.02964	1.00292	1.03048	0.551444
156543965	PREDICTED: transmembrane emp24 domain-containing protein 2 [Nasonia vitripennis]	23.4096	5.2749	24.52	1	6	0.886093	1.09063	0.937798	0.971508	0.995814	0.997344	1.04504	1.01273	1.04243	0.551568
345489372	PREDICTED: multidrug resistance-associated protein 1 isoform X3 [Nasonia vitripennis]	172.755	7.35693	6.13	4	8	1.05901	0.993384	0.998057	1.01682	1.02888	0.969955	0.998809	0.999215	0.982689	0.551892
645018364	PREDICTED: ATP-dependent RNA helicase vasa, isoform A isoform X2 [Nasonia vitripennis]	81.9255	5.24951	21.46	3	12	1.11724	0.923977	0.947842	0.996354	0.996625	0.92384	0.942852	0.954439	0.957931	0.551941
645035661	PREDICTED: LOW QUALITY PROTEIN: peroxidasin [Nasonia vitripennis]	147.21	7.26904	1.15	1	1	1.18092	0.993838	0.927573	1.03411	0.953747	1.02549	0.969709	0.982983	0.95056	0.552365
644994854	PREDICTED: carnitine O-palmitoyltransferase 1, muscle isoform-like [Nasonia vitripennis]	10.6125	9.40771	12.9	1	1	1.06732	0.848196	1.03253	0.982684	1.05815	0.992362	1.03489	1.02847	1.04659	0.552372
156546413	PREDICTED: pyridoxal kinase isoform X2 [Nasonia vitripennis]	32.8424	6.96143	22.64	2	6	0.959789	1.02217	1.05515	1.01237	1.05368	0.954867	0.940705	0.983083	0.971071	0.552474
644997428	PREDICTED: transcription initiation factor TFIID subunit 4 isoform X6 [Nasonia vitripennis]	96.8711	9.74463	1.1	6	1	1.06594	1.0454	0.968951	1.02676	0.868184	1.04915	1.03606	0.984464	0.958805	0.552506
156547769	PREDICTED: 5'-nucleotidase domain-containing protein 3 isoform X2 [Nasonia vitripennis]	61.7753	7.89893	15.11	2	8	0.968743	0.969696	1.07616	1.00487	0.962594	1.02733	0.938526	0.97615	0.971423	0.55327
645017019	PREDICTED: eukaryotic initiation factor 4A-III [Nasonia vitripennis]	35.2252	5.65576	32.58	1	7	1.00449	0.972053	0.986417	0.987653	0.985613	1.04281	0.978115	1.00218	1.01471	0.553414
645036157	PREDICTED: protein argonaute-3 [Nasonia vitripennis]	107.427	9.27588	6.2	1	5	1.09216	0.943632	0.938219	0.991338	1.02508	1.0212	1.02543	1.0239	1.03285	0.553782
289177006	glutathione S-transferase S3 [Nasonia vitripennis]	22.987	6.93213	30.69	1	4	1.07464	0.956914	0.994743	1.00877	1.00391	0.95098	0.996934	0.98394	0.975389	0.553836
355389949	putative odorant binding protein 38 [Nasonia vitripennis]	28.3944	8.04541	9.92	2	2	0.968919	1.05922	1.01059	1.01291	0.991136	1.0057	0.990482	0.995773	0.983084	0.55402
645011948	PREDICTED: brahma-associated protein of 60 kDa isoform X2 [Nasonia vitripennis]	56.9774	9.29053	3.44	2	1	1.22483	0.930925	0.971826	1.04253	1.04183	0.988162	0.903641	0.977879	0.937991	0.554436
645004703	PREDICTED: sodium/potassium-transporting ATPase subunit beta-2-like [Nasonia vitripennis]	37.5747	7.59131	12.84	1	3	1.01472	0.963217	1.02635	1.00143	1.05518	0.999735	1.00084	1.01858	1.01713	0.555105
645017245	PREDICTED: protein AAR2 homolog isoform X2 [Nasonia vitripennis]	35.9647	5.19873	4.13	2	1	1.36767	0.92976	0.898094	1.06517	1.042	0.94421	0.907016	0.964408	0.905399	0.555389
345494753	PREDICTED: probable arginine--tRNA ligase, mitochondrial [Nasonia vitripennis]	65.3039	8.23584	10.41	1	4	1.04689	0.983398	1.01709	1.01579	1.05322	1.00449	0.889953	0.982553	0.967276	0.555621
645009656	PREDICTED: heterogeneous nuclear ribonucleoprotein L [Nasonia vitripennis]	52.0539	7.73779	5.63	1	2	1.09156	0.846167	1.02568	0.9878	1.07246	1.05057	0.989525	1.03752	1.05033	0.555664
645018080	PREDICTED: pyruvate kinase isoform X3 [Nasonia vitripennis]	56.2439	7.04932	57.5	3	25	0.9696	0.983622	1.03419	0.995805	0.992041	1.01044	1.02756	1.01001	1.01427	0.555915
645038407	PREDICTED: guanine nucleotide-binding protein G(I)/G(S)/G(T) subunit beta-1 [Nasonia vitripennis]	25.7075	7.02002	25.21	1	5	1.06232	1.00324	0.975049	1.01354	0.968042	1.02059	0.994517	0.994384	0.981103	0.556097
156555428	PREDICTED: protein SCO1 homolog, mitochondrial [Nasonia vitripennis]	30.9872	7.76709	24.09	1	6	0.937192	1.00104	1.01925	0.985829	0.991143	1.01934	0.997431	1.00264	1.01705	0.557614
345483721	PREDICTED: protein msta, isoform B [Nasonia vitripennis]	53.4266	6.771	2.92	1	1	1.28834	0.908867	0.958389	1.05187	1.02739	0.984524	0.905518	0.972478	0.924526	0.557865
289177166	cytochrome P450 6AQ9 [Nasonia vitripennis]	59.3362	7.15186	2.73	1	1	1.0485	1.07078	0.968036	1.0291	1.00499	0.888531	1.07417	0.989231	0.961255	0.558258
156550027	PREDICTED: mitochondrial import receptor subunit TOM70 [Nasonia vitripennis]	64.4547	6.13818	17.57	1	7	0.98143	1.07362	0.917359	0.990801	1.0381	1.09293	0.956569	1.0292	1.03876	0.558342
156551035	PREDICTED: insulin-like growth factor-binding protein complex acid labile subunit [Nasonia vitripennis]	31.2725	8.08936	21.43	1	5	1.06584	1.01957	0.950707	1.01204	1.02455	1.01008	0.905258	0.979962	0.968303	0.558417
156536971	PREDICTED: 40S ribosomal protein S9 [Nasonia vitripennis]	22.4786	10.7554	50.26	1	12	0.908461	1.04891	1.01205	0.989808	0.988213	1.01885	1.0496	1.01889	1.02938	0.558521
156553405	PREDICTED: vesicle-associated membrane protein-associated protein A [Nasonia vitripennis]	28.7498	8.08936	48.08	1	11	0.92319	1.06465	0.978853	0.988898	0.989526	1.0186	1.04229	1.0168	1.02822	0.559386
156545002	PREDICTED: dolichyl-diphosphooligosaccharide--protein glycosyltransferase 48 kDa subunit [Nasonia vitripennis]	47.9025	6.01123	24.83	1	9	0.90689	1.05932	0.969215	0.978475	0.975053	1.03941	1.01254	1.009	1.0312	0.559512
156544484	PREDICTED: inositol oxygenase [Nasonia vitripennis]	34.8341	6.15088	8.47	1	2	0.817411	0.986128	1.08899	0.964175	1.11031	1.08701	0.894369	1.03056	1.06886	0.560249
645017856	PREDICTED: deoxyuridine 5'-triphosphate nucleotidohydrolase isoform X1 [Nasonia vitripennis]	15.8481	6.15088	12.24	1	2	0.789719	1.15997	0.94882	0.966169	1.04164	1.10402	0.96986	1.0385	1.07487	0.56029
156543328	PREDICTED: 40S ribosomal protein S28 [Nasonia vitripennis]	7.39609	9.979	49.23	1	3	0.939004	1.01473	0.999497	0.984411	0.96713	1.01464	1.02771	1.00316	1.01904	0.560351
198286289	ATP synthase subunit 8 (mitochondrion) [Nasonia vitripennis]	6.52238	9.64209	15.38	4	1	1.07786	0.832525	1.3073	1.07256	0.968904	0.687525	1.18365	0.946692	0.882645	0.560575
156545360	PREDICTED: E3 ubiquitin-protein ligase KCMF1-like isoform X3 [Nasonia vitripennis]	57.4622	8.25049	8.07	3	3	1.6969	0.798165	0.867798	1.12095	1.0577	0.942131	0.795732	0.931856	0.831306	0.560772
345489304	PREDICTED: succinate-semialdehyde dehydrogenase, mitochondrial [Nasonia vitripennis]	55.244	7.1958	32.35	1	14	1.05065	1.03149	0.970949	1.0177	1.02439	0.992918	0.984682	1.00066	0.983263	0.560937
644991466	PREDICTED: carboxypeptidase Q-like [Nasonia vitripennis]	53.5665	5.78271	4.1	1	2	0.949675	1.00944	1.08299	1.01404	0.933616	1.00264	1.01765	0.984634	0.971006	0.560987
644997364	PREDICTED: dnaJ homolog subfamily C member 11 isoform X4 [Nasonia vitripennis]	63.8222	9.17334	11.72	4	6	1.08547	0.953058	1.01158	1.0167	1.01182	0.97448	0.988151	0.991483	0.975195	0.561029
156553454	PREDICTED: protein BUD31 homolog [Nasonia vitripennis]	16.8945	8.5874	6.25	1	1	1.04537	1.03341	0.882047	0.986941	1.07621	0.974637	1.02429	1.02504	1.03861	0.561071
645022048	PREDICTED: elongation factor 1-beta [Nasonia vitripennis]	28.5868	4.95752	41.34	1	7	0.886005	1.04833	0.992307	0.975547	0.955213	1.07858	1.00584	1.01321	1.03861	0.561493
156538491	PREDICTED: venom acid phosphatase Acph-1-like [Nasonia vitripennis]	44.1783	5.97314	2.84	1	1	0.693452	1.12453	0.964857	0.927612	0.940745	1.13815	0.969529	1.01614	1.09544	0.561718
345491599	PREDICTED: ras-related protein Rab-10 [Nasonia vitripennis]	22.9617	7.40088	30	1	5	0.950012	1.04835	0.950752	0.983038	0.989296	0.975692	1.06566	1.01022	1.02765	0.561829
645033820	PREDICTED: LOW QUALITY PROTEIN: leupaxin-like [Nasonia vitripennis]	68.6324	7.21045	27.71	1	11	0.993253	1.01074	0.973134	0.992375	0.972395	0.98197	0.997843	0.984069	0.991631	0.562123
345493131	PREDICTED: cuticle protein CP14.6 [Nasonia vitripennis]	14.253	4.37354	11.85	1	1	0.92045	1.11969	0.881865	0.974002	1.03979	0.948123	1.09565	1.02786	1.05529	0.562187
156544510	PREDICTED: rRNA 2'-O-methyltransferase fibrillarin [Nasonia vitripennis]	33.6576	10.1108	22.09	1	4	1.12985	0.952598	0.971824	1.01809	1.03018	0.95358	0.953802	0.979187	0.96179	0.56242
645017853	PREDICTED: V-type proton ATPase subunit G [Nasonia vitripennis]	13.9332	8.93896	40.34	1	5	1.01034	0.976019	1.05462	1.01366	0.963796	0.994471	1.02739	0.995219	0.98181	0.562484
336391152	heme oxygenase [Nasonia vitripennis]	29.1651	7.92822	4.4	1	1	1.45254	0.862935	0.927792	1.08109	1.09113	0.966977	0.79715	0.951753	0.880366	0.562709
156547500	PREDICTED: serine/threonine-protein phosphatase 2A 65 kDa regulatory subunit A alpha isoform isoform X1 [Nasonia vitripennis]	65.7671	4.95752	33.56	2	18	0.977724	1.01712	1.01062	1.00182	0.968771	0.989028	1.0139	0.990568	0.988769	0.562902
345478782	PREDICTED: metal transporter CNNM4 [Nasonia vitripennis]	104.658	5.50342	1.49	1	1	1.58063	0.834522	0.879603	1.09825	1.00169	1.04671	0.760319	0.936241	0.852483	0.563219
645014856	PREDICTED: probable serine/threonine-protein kinase DDB_G0278901 isoform X3 [Nasonia vitripennis]	78.4654	8.71924	5.1	3	2	1.03027	1.07015	0.973046	1.02449	0.982121	1.06734	0.932665	0.994042	0.970282	0.563331
645015096	PREDICTED: golgin subfamily A member 4 isoform X3 [Nasonia vitripennis]	373.635	4.75439	10.36	3	25	1.05754	0.970918	1.01502	1.01449	1.01455	0.976227	1.00097	0.997248	0.983002	0.563366
156545926	PREDICTED: uncharacterized protein LOC100113557 [Nasonia vitripennis]	13.8339	8.35303	43.55	1	5	1.13919	1.01039	0.930707	1.02676	0.855373	1.0179	1.04651	0.973262	0.947895	0.56342
645017185	PREDICTED: retinal dehydrogenase 1-like isoform X1 [Nasonia vitripennis]	53.1787	7.38623	41.7	2	14	0.926485	1.12251	1.01573	1.02158	0.910412	1.03093	0.99689	0.979412	0.958725	0.563641
156540814	PREDICTED: ADP-ribosylation factor 1 [Nasonia vitripennis]	20.6936	6.58057	52.2	1	4	1.04858	0.891712	1.16096	1.03375	0.956789	0.884086	1.0784	0.97309	0.941322	0.563663
156548615	PREDICTED: superoxide dismutase [Cu-Zn] [Nasonia vitripennis]	15.4377	6.59521	77.33	1	11	0.88159	1.04358	1.03344	0.986204	0.999469	1.0209	1.03941	1.01992	1.03419	0.563731
156537384	PREDICTED: translocating chain-associated membrane protein 1-like 1 [Nasonia vitripennis]	42.8178	9.71533	4.46	1	2	0.880995	1.07433	0.972836	0.976053	0.943354	0.97327	1.19387	1.03683	1.06227	0.563898
644993446	PREDICTED: meiosis arrest female protein 1 [Nasonia vitripennis]	152.213	7.56201	6.67	7	7	0.842133	1.01892	1.03491	0.965321	1.00898	1.00066	1.00272	1.00412	1.04019	0.564285
645004041	PREDICTED: glycine N-acyltransferase-like protein 3 [Nasonia vitripennis]	34.3409	7.56201	8.59	1	2	0.974707	0.991283	1.00988	0.991958	0.946577	1.07612	1.02673	1.01648	1.02472	0.56453
645024724	PREDICTED: uncharacterized protein LOC100680143 [Nasonia vitripennis]	29.1767	5.26221	22.39	1	5	1.08291	0.928092	1.07959	1.0302	1.00351	0.938781	1.03807	0.993452	0.964333	0.56573
156540690	PREDICTED: prohibitin-2-like [Nasonia vitripennis]	8.95873	9.90576	46.91	1	3	0.907809	1.08459	0.95718	0.983194	0.958483	1.0583	1.04808	1.02162	1.03909	0.565776
645013925	PREDICTED: MOB kinase activator 1B isoform X3 [Nasonia vitripennis]	21.8131	6.32861	12.17	3	2	0.976079	0.944226	1.17122	1.03051	1.03661	0.982498	0.926799	0.98197	0.952898	0.566111
645011591	PREDICTED: NHP2-like protein 1 homolog [Nasonia vitripennis]	13.9485	8.29443	18.9	1	2	0.942413	0.972421	1.03146	0.982097	0.956297	1.05786	1.00567	1.00661	1.02496	0.566575
345479249	PREDICTED: SUMO-activating enzyme subunit 2 [Nasonia vitripennis]	74.2381	5.04639	11.26	1	7	0.916495	1.05001	1.00071	0.989074	1.08012	0.946603	1.0449	1.02387	1.03518	0.566766
345495282	PREDICTED: uncharacterized protein LOC100122969 [Nasonia vitripennis]	31.2065	8.104	15.05	1	3	1.14375	0.917918	0.971311	1.01099	1.01989	1.00856	0.834883	0.954444	0.944065	0.566797
345483173	PREDICTED: exocyst complex component 2 [Nasonia vitripennis]	101.002	6.01123	2.58	1	2	1.015	1.08238	0.954023	1.01714	0.968152	1.02858	0.976896	0.99121	0.974511	0.566832
645027858	PREDICTED: cAMP-dependent protein kinase type II regulatory subunit [Nasonia vitripennis]	42.7647	5.10986	36.24	1	14	1.06718	0.962617	1.0091	1.01296	0.998352	0.984246	0.99908	0.993893	0.981172	0.567246
156537149	PREDICTED: myotrophin [Nasonia vitripennis]	13.5709	6.01123	36.36	1	4	0.967933	1.02231	0.999765	0.99667	1.01636	1.05422	0.97243	1.01434	1.01773	0.567754
645025434	PREDICTED: acyl carrier protein, mitochondrial isoform X1 [Nasonia vitripennis]	21.3863	6.94678	16.84	5	4	0.980707	0.995169	1.04744	1.00777	0.999005	0.947771	1.02118	0.989319	0.98169	0.568326
645026362	PREDICTED: uncharacterized protein LOC100120271 [Nasonia vitripennis]	106.955	5.46533	10.25	1	8	1.22328	0.897407	0.971462	1.03072	0.970949	0.964696	0.972784	0.969476	0.940586	0.568394
645034916	PREDICTED: mitogen-activated protein kinase kinase kinase 15 [Nasonia vitripennis]	173.169	6.3667	7.55	1	10	1.03463	0.961149	1.05875	1.01818	1.00107	0.998877	0.999914	0.999954	0.982104	0.568442
645003123	PREDICTED: growth hormone-regulated TBC protein 1-A isoform X2 [Nasonia vitripennis]	35.7159	8.67529	4.52	2	1	0.974613	0.976316	0.971276	0.974068	0.980578	0.894544	1.24098	1.0387	1.06635	0.568513
645023245	PREDICTED: LOW QUALITY PROTEIN: 39S ribosomal protein L4, mitochondrial [Nasonia vitripennis]	29.7817	9.42236	17.69	1	4	1.00064	0.989674	0.962447	0.984253	0.933583	0.982316	1.17658	1.03083	1.04732	0.568669
345481449	PREDICTED: uncharacterized protein LOC100679744 isoform X2 [Nasonia vitripennis]	141.786	7.88428	2.67	2	2	1.12394	0.919967	1.03342	1.02578	0.996036	1.0003	0.969946	0.988759	0.963913	0.569193
644998754	PREDICTED: serine/threonine/tyrosine-interacting protein-like isoform X3 [Nasonia vitripennis]	21.8611	7.57666	37.82	3	6	0.954068	1.03366	1.00116	0.996296	0.983706	1.05829	1.00623	1.01608	1.01985	0.569513
645041795	PREDICTED: SET and MYND domain-containing protein 4-like [Nasonia vitripennis]	78.6465	7.15186	3.87	1	2	1.36138	0.889374	0.934951	1.0619	1.03042	0.860908	0.999105	0.963478	0.907313	0.569605
645016615	PREDICTED: signal recognition particle subunit SRP72 isoform X2 [Nasonia vitripennis]	73.2312	8.99756	22.55	2	11	1.02521	0.980797	1.02068	1.0089	0.976839	0.980149	1.02893	0.995307	0.986531	0.569709
345479324	PREDICTED: phosphoglycerate kinase [Nasonia vitripennis]	50.2804	8.73389	60.04	1	25	0.918082	1.03498	1.10556	1.01954	0.967743	0.935516	1.03915	0.980803	0.962004	0.569886
345494099	PREDICTED: nidogen-2-like, partial [Nasonia vitripennis]	29.4526	6.07471	24.18	1	5	1.02174	0.983546	1.05045	1.01858	1.02852	0.968305	1.01011	1.00231	0.984031	0.57008
645004109	PREDICTED: 39S ribosomal protein L18, mitochondrial, partial [Nasonia vitripennis]	9.03256	6.50732	15	1	1	0.786326	0.995813	1.04016	0.940767	0.742123	1.11876	1.29721	1.0527	1.11898	0.570544
645005582	PREDICTED: protein ariadne-1-like [Nasonia vitripennis]	59.6431	5.60498	4.51	1	2	1.21211	1.02989	0.867838	1.03662	1.02243	0.961809	0.935503	0.973246	0.938869	0.570665
645003442	PREDICTED: cytoplasmic dynein 1 light intermediate chain 1 isoform X3 [Nasonia vitripennis]	53.1519	5.8335	7.42	3	4	1.01983	1.06427	0.970203	1.0181	1.04215	0.936672	0.999722	0.99285	0.975198	0.570881
645021836	PREDICTED: ATP-dependent RNA helicase SUV3 homolog, mitochondrial [Nasonia vitripennis]	82.6904	7.91357	1.93	1	1	1.16977	0.819141	1.15084	1.04658	0.992422	0.89779	1.02721	0.972474	0.929189	0.571014
156538711	PREDICTED: flightin isoform X1 [Nasonia vitripennis]	18.2009	7.53271	30.32	2	5	0.965769	1.00417	1.05975	1.0099	0.970318	0.962537	1.03217	0.988342	0.978658	0.572013
239735567	aminotransferase-like venom protein 1 precursor [Nasonia vitripennis]	49.1922	7.26904	20.51	2	8	0.730092	0.878392	1.23771	0.948732	1.02276	1.07183	1.03084	1.04181	1.09811	0.572105
644993712	PREDICTED: insulin-degrading enzyme isoform X2 [Nasonia vitripennis]	116.97	6.40479	14.67	2	14	0.989982	1.01205	1.00955	1.00386	0.990503	0.961038	1.02411	0.991883	0.988065	0.572356
239787128	venom protein X precursor [Nasonia vitripennis]	12.8772	5.0083	49.11	1	5	0.775304	0.885256	1.2315	0.96402	1.03489	1.06581	1.04488	1.04853	1.08766	0.572749
645019934	PREDICTED: regulator of nonsense transcripts 1 isoform X2 [Nasonia vitripennis]	122.866	6.59521	5.01	2	4	1.03767	0.951357	1.0027	0.997243	1.04527	1.07487	0.95319	1.02444	1.02728	0.573162
218751884	syntaxin 17 [Nasonia vitripennis]	35.1382	6.62451	12.86	1	3	1.13381	0.938443	0.989353	1.02053	1.04365	0.944251	0.951149	0.979683	0.959971	0.573408
645019416	PREDICTED: DNA topoisomerase 2 [Nasonia vitripennis]	171.539	8.76318	3.51	1	5	1.00536	1.00476	0.962793	0.990971	1.04733	0.957096	1.02455	1.00966	1.01886	0.573642
283046809	venom protein N precursor [Nasonia vitripennis]	16.4358	6.50732	15	1	2	0.709987	0.782004	1.28854	0.926842	0.992056	1.05414	1.0713	1.03916	1.12119	0.573798
644994433	PREDICTED: LOW QUALITY PROTEIN: U1 small nuclear ribonucleoprotein 70 kDa-like [Nasonia vitripennis]	51.3735	9.78857	5.62	1	2	1.06286	0.842172	1.00639	0.970475	1.17281	0.978823	0.939379	1.03034	1.06168	0.573959
645030206	PREDICTED: inosine-uridine preferring nucleoside hydrolase-like [Nasonia vitripennis]	48.4523	8.5874	7.21	1	2	1.1342	0.880914	1.09275	1.03595	1.08387	0.912096	0.938	0.977987	0.944045	0.574422
645000901	PREDICTED: importin subunit alpha-4 [Nasonia vitripennis]	54.4845	5.30029	23.53	1	9	1.0861	0.930662	1.03999	1.01892	1.01441	0.936646	1.00954	0.986864	0.968541	0.574522
645021167	PREDICTED: oxysterol-binding protein-related protein 2 isoform X2 [Nasonia vitripennis]	46.4403	6.72705	5.2	2	1	1.10066	0.985159	0.984368	1.0234	0.922333	1.00773	1.0435	0.991186	0.968527	0.574568
156548992	PREDICTED: glutamate dehydrogenase, mitochondrial [Nasonia vitripennis]	60.8931	7.89893	47.99	1	24	0.966697	1.00719	1.0436	1.00583	0.984026	0.994497	0.997614	0.992046	0.986297	0.574692
645015625	PREDICTED: troponin T, skeletal muscle [Nasonia vitripennis]	48.1761	4.79248	46.55	2	28	0.912811	0.978643	1.05825	0.983235	0.969314	1.01764	1.05113	1.01269	1.02996	0.574778
645009636	PREDICTED: ras-related protein Rab-39A [Nasonia vitripennis]	23.9058	6.97607	15.71	1	3	0.951327	1.06198	0.933423	0.982243	1.05689	1.07201	0.928833	1.01925	1.03767	0.574783
156548432	PREDICTED: uncharacterized protein LOC100121231 [Nasonia vitripennis]	34.9403	7.6792	4.43	1	1	1.24371	1.09076	0.829326	1.0546	1.10305	0.921845	0.886023	0.970307	0.920071	0.575328
345487780	PREDICTED: ubiquitin carboxyl-terminal hydrolase 14 [Nasonia vitripennis]	57.7621	5.31299	24.07	1	11	1.03214	0.995019	0.949284	0.992148	0.996328	0.99019	1.0434	1.00997	1.01797	0.575391
645003346	PREDICTED: LOW QUALITY PROTEIN: afadin-like [Nasonia vitripennis]	226.928	8.39697	1.17	1	2	1.44088	0.833874	0.931412	1.06872	0.944739	1.02184	0.88871	0.951764	0.890561	0.575535
345483676	PREDICTED: protein DJ-1-like [Nasonia vitripennis]	23.4794	8.19189	52.04	1	10	0.960409	1.02554	1.01829	1.00141	1.01463	1.03311	0.998357	1.01536	1.01393	0.575706
645005228	PREDICTED: protein CASC3-like isoform X2 [Nasonia vitripennis]	103.658	5.56689	1.2	2	1	2.39977	0.63217	0.66402	1.23199	1.2247	0.625904	0.727497	0.859366	0.697545	0.575842
345485940	PREDICTED: protein lethal(2)essential for life-like [Nasonia vitripennis]	22.6426	7.62061	28.21	1	4	1.0927	1.21612	0.808956	1.03926	0.848151	1.15884	0.813705	0.940231	0.904714	0.576343
156538002	PREDICTED: esterase E4 [Nasonia vitripennis]	61.6187	5.38916	13.1	1	5	1.20432	0.816546	1.11593	1.0456	1.03819	0.904384	0.96917	0.970581	0.928254	0.57645
156546355	PREDICTED: cyclin-dependent kinase 7 [Nasonia vitripennis]	38.0324	8.45557	4.14	1	1	1.05475	0.969793	1.09901	1.04118	1.00878	0.815301	1.12241	0.982164	0.943314	0.577006
156544544	PREDICTED: proteasome subunit alpha type-6-like [Nasonia vitripennis]	27.2998	7.97217	47.97	1	11	0.879456	1.07811	0.997318	0.984961	0.97868	1.03776	1.05085	1.02243	1.03804	0.577061
644993379	PREDICTED: putative RNA-binding protein Luc7-like 2 isoform X2 [Nasonia vitripennis]	34.9418	10.3159	5.12	2	1	1.09425	0.868285	0.988109	0.983549	1.01937	1.07442	0.984724	1.02617	1.04333	0.57707
645011361	PREDICTED: dystrophin, isoforms A/C/F/G/H [Nasonia vitripennis]	462.977	5.60498	1.23	1	4	1.16033	0.977727	0.977817	1.03862	1.01347	0.94662	1.03511	0.998401	0.961273	0.577503
156549559	PREDICTED: uncharacterized protein LOC100118686 [Nasonia vitripennis]	12.5441	5.12256	65.25	1	9	0.803911	1.13185	0.951984	0.962581	1.0557	1.02932	0.979296	1.02144	1.06114	0.57836
345482477	PREDICTED: coatomer subunit delta [Nasonia vitripennis]	57.4664	5.63037	26.89	1	11	0.910769	1.05381	0.981161	0.981914	1.00914	1.02687	0.98733	1.00778	1.02634	0.578626
645036771	PREDICTED: ATP synthase subunit s-like protein [Nasonia vitripennis]	33.3031	6.94678	3.85	1	1	1.05941	1.11211	0.914942	1.02882	0.911449	0.984431	1.05904	0.984974	0.957379	0.579067
156543796	PREDICTED: protoporphyrinogen oxidase [Nasonia vitripennis]	51.9756	9.33447	8.23	1	3	0.981979	0.992043	1.121	1.03167	1.0085	0.977035	1.02473	1.00342	0.972615	0.579356
229577412	transport and golgi organization 9 [Nasonia vitripennis]	41.9395	6.99072	7.12	1	3	0.969523	1.05067	1.00049	1.00689	0.908146	0.981059	1.04733	0.978846	0.972145	0.579972
645009454	PREDICTED: unconventional myosin-XVIIIa isoform X7 [Nasonia vitripennis]	106.395	5.23682	6.2	7	4	1.17615	0.952344	0.953684	1.02739	1.03728	0.977444	0.920023	0.978248	0.952167	0.580015
645011589	PREDICTED: gamma-glutamyl hydrolase A-like isoform X3 [Nasonia vitripennis]	31.0502	8.35303	18.98	3	5	0.900184	0.900436	1.09773	0.966117	0.972594	1.03831	1.01103	1.00731	1.04264	0.580057
156550630	PREDICTED: 26S proteasome non-ATPase regulatory subunit 14-like [Nasonia vitripennis]	35.0379	6.60986	10	1	2	0.827024	1.15908	0.89539	0.960497	1.05868	1.11432	0.91882	1.03061	1.07299	0.580519
645000053	PREDICTED: myosin regulatory light chain sqh [Nasonia vitripennis]	24.762	5.47803	33.18	1	6	0.946477	1.06201	0.926088	0.97819	0.97104	1.04227	1.006	1.00644	1.02888	0.580628
645023015	PREDICTED: putative U5 small nuclear ribonucleoprotein 200 kDa helicase [Nasonia vitripennis]	241.981	6.20166	6.62	1	10	1.12586	0.912644	1.00886	1.01579	0.987189	0.962807	0.985576	0.978524	0.963315	0.581086
156543140	PREDICTED: multifunctional protein ADE2 [Nasonia vitripennis]	46.7164	7.98682	46.08	1	21	0.976059	1.04243	0.997918	1.00547	1.01805	0.995618	0.954297	0.98932	0.983939	0.58222
645005782	PREDICTED: leucine-rich repeat-containing protein 57 [Nasonia vitripennis]	26.9564	8.74854	12.18	1	2	1.04237	0.956421	0.985369	0.994721	1.00365	0.983499	1.05695	1.0147	1.02008	0.582286
345479791	PREDICTED: 60S ribosomal protein L5 [Nasonia vitripennis]	34.1539	9.74463	45.45	1	13	0.880077	1.05395	1.00908	0.981035	0.944243	1.08511	1.03269	1.02068	1.04041	0.582477
645016517	PREDICTED: ras-related protein Rab-7a [Nasonia vitripennis]	23.2286	5.79541	64.25	1	11	1.01038	1.02914	0.962947	1.00082	1.0092	0.995599	0.949968	0.984923	0.984115	0.58257
295421677	unnamed protein product [Nasonia vitripennis]	31.4574	5.5542	4.95	2	1	1.14071	0.760199	1.26207	1.05433	0.946986	0.949509	0.994417	0.963637	0.913983	0.582782
645000685	PREDICTED: uncharacterized protein LOC100124086 [Nasonia vitripennis]	171.473	5.93506	7.82	1	9	1.03879	1.04167	0.954817	1.01176	0.993145	0.994858	0.996257	0.994753	0.983192	0.582817
645029270	PREDICTED: zinc finger protein 850-like [Nasonia vitripennis]	161.531	6.49365	1.72	1	1	0.810543	1.19156	0.892326	0.964808	1.05552	0.963617	1.09319	1.03744	1.07528	0.583744
645037717	PREDICTED: neurofibromin isoform X2 [Nasonia vitripennis]	311.916	6.84424	8.68	4	17	0.957047	1.02622	1.00863	0.997301	0.996514	1.03742	1.00152	1.01182	1.01456	0.584366
156549788	PREDICTED: guanine nucleotide-binding protein subunit beta-5 [Nasonia vitripennis]	38.1367	5.35107	3.44	1	1	1.31631	0.790663	1.07514	1.06071	1.04399	0.958281	0.899087	0.967118	0.911769	0.584647
645034320	PREDICTED: nuclear protein localization protein 4 homolog isoform X3 [Nasonia vitripennis]	72.5037	6.41748	10.06	3	5	0.93045	1.0531	0.965873	0.983141	1.01469	1.02462	0.979457	1.00625	1.02351	0.58471
355389937	putative odorant binding protein 32 [Nasonia vitripennis]	16.5391	5.03369	25.17	1	2	0.993607	0.985975	1.00746	0.99568	1.00106	1.05685	0.973988	1.01063	1.01502	0.584724
156538110	PREDICTED: nascent polypeptide-associated complex subunit alpha [Nasonia vitripennis]	22.3894	4.75439	38.86	1	7	1.00508	1.00947	0.972292	0.995611	0.99293	0.984936	1.05206	1.00997	1.01443	0.584776
156553897	PREDICTED: spectrin alpha chain [Nasonia vitripennis]	278.352	5.2749	51.51	1	102	1.02231	0.990724	0.989818	1.00095	0.970504	1.00208	1.00332	0.991967	0.991025	0.585007
645004897	PREDICTED: vesicle-associated membrane protein 2 isoform X3 [Nasonia vitripennis]	13.2179	5.51611	39.52	3	4	1.01617	1.00784	0.995425	1.00648	1.00656	1.00293	0.998433	1.00264	0.996188	0.585017
156550362	PREDICTED: transmembrane protein 147 [Nasonia vitripennis]	25.5046	8.49951	4.37	1	1	0.84476	0.921245	1.12564	0.96388	0.875412	1.11789	1.10236	1.03189	1.07056	0.585328
156540019	PREDICTED: tRNA (cytosine(34)-C(5))-methyltransferase [Nasonia vitripennis]	79.2193	7.84033	2.17	1	2	0.894969	1.06952	1.00816	0.990884	0.990012	1.02406	1.05539	1.02315	1.03257	0.585609
156537666	PREDICTED: chymotrypsin-2 isoform X1 [Nasonia vitripennis]	27.329	7.69385	27.42	2	5	1.00118	0.99151	1.10775	1.03348	0.774297	1.03306	1.10365	0.970334	0.9389	0.586198
645034741	PREDICTED: uncharacterized protein LOC100123495 isoform X2 [Nasonia vitripennis]	168.342	7.37158	1.5	1	1	0.913633	1.00063	1.0457	0.986657	1.06622	1.04083	0.946989	1.01801	1.03178	0.586442
645010088	PREDICTED: troponin I isoform X16 [Nasonia vitripennis]	23.8128	9.78857	48.48	4	6	0.927367	1.07982	1.03874	1.01531	1.00662	0.956739	0.997462	0.986939	0.972056	0.58665
645004071	PREDICTED: phosphopantothenoylcysteine decarboxylase [Nasonia vitripennis]	21.6741	7.94287	14.29	1	2	0.986621	0.985899	0.996139	0.989553	1.09821	0.928064	1.03012	1.0188	1.02955	0.586789
345495602	PREDICTED: trifunctional enzyme subunit alpha, mitochondrial [Nasonia vitripennis]	83.106	9.1001	60.39	1	37	0.995039	0.979725	1.02586	1.00021	1.01738	0.988956	1.02523	1.01052	1.01031	0.586832
345488071	PREDICTED: coiled-coil domain-containing protein 6-like [Nasonia vitripennis]	34.0596	6.56592	16.84	1	4	0.880648	1.08083	0.961804	0.974428	1.01426	1.05573	0.965897	1.01196	1.03852	0.587173
345480592	PREDICTED: aminopeptidase N-like [Nasonia vitripennis]	107.682	5.26221	1.39	1	1	1.15966	0.894979	1.04389	1.03284	0.982585	0.965138	1.01312	0.986948	0.955564	0.58732
645037648	PREDICTED: protein SET isoform X2 [Nasonia vitripennis]	36.3159	4.22119	15.14	2	4	0.901547	1.05711	0.959139	0.9726	1.01293	1.06587	0.941392	1.00673	1.03509	0.587788
645041050	PREDICTED: moesin/ezrin/radixin homolog 1-like isoform X6 [Nasonia vitripennis]	25.804	7.18115	33.03	6	7	0.993165	1.07989	0.95559	1.00955	0.951702	1.01023	0.994833	0.985589	0.976268	0.58826
156543332	PREDICTED: probable 28S ribosomal protein S25, mitochondrial [Nasonia vitripennis]	19.5131	8.86572	5.92	1	1	0.875224	1.14231	0.887598	0.968377	0.909542	1.05682	1.12958	1.03198	1.06568	0.589095
345493995	PREDICTED: probable 39S ribosomal protein L45, mitochondrial [Nasonia vitripennis]	34.8462	9.45166	9.09	1	2	0.827802	1.15796	0.910188	0.965317	1.07584	1.02251	0.978748	1.0257	1.06255	0.589574
217330625	small nuclear ribonucleoprotein polypeptide C [Nasonia vitripennis]	18.2137	9.64209	5.85	1	1	0.910668	1.03168	1.02843	0.990259	1.0049	1.03644	1.00199	1.01444	1.02442	0.589697
645005750	PREDICTED: cytochrome P450 4C1 isoform X2 [Nasonia vitripennis]	55.8109	8.104	5.36	2	1	1.02646	0.885209	1.03993	0.983868	0.95695	0.987568	1.1378	1.02744	1.04429	0.590723
644996801	PREDICTED: isocitrate dehydrogenase [NAD] subunit gamma, mitochondrial-like [Nasonia vitripennis]	42.358	9.1001	46.89	1	14	1.01328	0.952902	1.11113	1.02577	0.98324	0.997807	1.01412	0.998389	0.973308	0.591126
645016477	PREDICTED: dihydrofolate reductase [Nasonia vitripennis]	21.3461	8.17725	27.72	1	5	0.935645	0.992219	1.02728	0.985048	0.977719	1.00219	1.02834	1.00275	1.01797	0.591999
645019191	PREDICTED: NPF-like isoform X1 [Nasonia vitripennis]	53.6014	6.59521	5.78	1	2	0.920728	0.891585	1.11284	0.975051	0.950644	1.00377	1.11983	1.02475	1.05097	0.592315
156543324	PREDICTED: tubulin beta chain-like [Nasonia vitripennis]	50.1299	4.93213	7.14	1	1	0.84102	1.11402	0.950404	0.968483	0.915389	1.10359	1.05621	1.02506	1.05842	0.592473
156547291	PREDICTED: cysteine--tRNA ligase, cytoplasmic [Nasonia vitripennis]	84.4007	6.72705	5.03	1	3	0.951479	1.06637	1.00663	1.00816	1.04707	1.01651	1.021	1.02819	1.01987	0.592765
645024722	PREDICTED: uncharacterized protein LOC100118005 [Nasonia vitripennis]	28.3673	7.09326	29.48	1	6	0.901158	1.02488	0.977357	0.9678	0.865347	1.13421	1.05629	1.01862	1.05251	0.593041
345482067	PREDICTED: prostatic acid phosphatase-like [Nasonia vitripennis]	45.6898	5.30029	3.75	1	1	1.20719	0.714599	1.26125	1.06101	1.05815	0.948535	0.857423	0.954703	0.899802	0.593093
254540039	cytochrome c oxidase subunit 7C, mitochondrial [Nasonia vitripennis]	8.42654	10.1987	27.78	1	2	0.958202	1.02955	1.05918	1.01564	1.00718	0.881366	1.05461	0.981054	0.965945	0.593696
345485882	PREDICTED: serine/threonine-protein phosphatase 2A catalytic subunit alpha isoform [Nasonia vitripennis]	35.4054	5.5415	44.34	1	9	0.938278	1.01945	1.01608	0.991269	0.987455	1.10894	0.967032	1.02114	1.03014	0.593825
345495450	PREDICTED: 60S ribosomal protein L44 [Nasonia vitripennis]	12.5279	10.7847	14.42	1	2	0.827583	1.05087	1.05071	0.976388	1.03308	0.902464	1.18541	1.04032	1.06548	0.594039
345485391	PREDICTED: ATP-binding cassette sub-family B member 6, mitochondrial [Nasonia vitripennis]	96.0696	8.1333	14.34	1	9	0.994994	1.01263	1.00892	1.00551	0.982663	1.00853	1.00788	0.999691	0.994211	0.594082
645008516	PREDICTED: 28S ribosomal protein S23, mitochondrial [Nasonia vitripennis]	24.4359	9.20264	16.19	1	4	0.923698	1.11547	0.893651	0.977608	0.966779	1.04105	1.05429	1.02071	1.04408	0.594527
307095929	elongation factor 1-alpha, partial [Nasonia vitripennis]	37.6824	7.73779	69.05	2	1	1.03582	0.95754	0.935877	0.976411	0.937505	1.04528	1.024	1.00226	1.02648	0.59488
156549238	PREDICTED: uncharacterized protein LOC100113974 [Nasonia vitripennis]	13.6959	5.84619	11.38	1	1	1.01244	1.00179	1.0347	1.01631	0.970582	1.07369	0.927906	0.990726	0.974825	0.594888
345495227	PREDICTED: carotenoid isomerooxygenase isoform X2 [Nasonia vitripennis]	73.9579	7.23975	2.01	2	1	1.07785	0.752406	1.0121	0.947451	0.816404	0.969402	1.40859	1.0648	1.12386	0.594892
644993456	PREDICTED: LOW QUALITY PROTEIN: titin-like [Nasonia vitripennis]	537.131	9.01221	2.47	1	9	1.19626	0.93198	0.982616	1.03695	1.00073	0.974688	0.994737	0.990051	0.954771	0.595214
198114495	NADH dehydrogenase subunit 1, partial (mitochondrion) [Nasonia vitripennis]	26.0232	5.45264	9.73	2	2	1.04864	0.889477	1.12725	1.02179	0.956248	0.95704	1.02508	0.979457	0.958569	0.595812
645036333	PREDICTED: huntingtin-interacting protein 1 isoform X2 [Nasonia vitripennis]	107.308	6.02393	7.54	2	5	1.05432	0.977614	0.991162	1.0077	0.947882	1.03728	0.976864	0.987341	0.979799	0.595913
645000459	PREDICTED: T-complex protein 1 subunit theta [Nasonia vitripennis]	59.8851	5.92236	55.25	1	27	0.909076	1.06907	0.996579	0.991575	0.996174	1.03549	1.02541	1.01902	1.02768	0.59607
645010589	PREDICTED: epidermal growth factor receptor kinase substrate 8-like protein 1 isoform X2 [Nasonia vitripennis]	92.7802	6.29053	5.8	2	4	1.15012	0.91831	1.00354	1.02399	0.968556	0.953445	1.02696	0.982986	0.959956	0.596079
156548149	PREDICTED: tubulin alpha-1 chain [Nasonia vitripennis]	49.9626	5.13525	58	3	2	0.971915	1.0652	0.988334	1.00848	0.97014	1.01444	0.986519	0.990365	0.982035	0.59628
645010918	PREDICTED: TOM1-like protein 2 [Nasonia vitripennis]	54.8255	5.21143	20.12	1	6	0.977938	1.05321	1.01192	1.01436	1.01468	1.02477	0.947536	0.99566	0.981566	0.596704
645037505	PREDICTED: uncharacterized protein LOC100122611 [Nasonia vitripennis]	214.242	6.30322	13.69	1	24	1.11581	1.0691	0.877408	1.02078	0.88202	1.04903	0.980513	0.97052	0.950767	0.596794
345493688	PREDICTED: alpha-glucosidase-like [Nasonia vitripennis]	64.0505	6.0874	6.8	1	3	1.15158	0.891839	1.03704	1.02682	0.981793	0.994543	0.974346	0.983561	0.957872	0.596812
156549504	PREDICTED: neurotactin [Nasonia vitripennis]	81.0232	6.50732	5.03	1	3	1.15399	0.851985	1.03537	1.01378	0.946934	1.01843	0.915995	0.960453	0.947397	0.596822
645010713	PREDICTED: macrosialin isoform X2 [Nasonia vitripennis]	30.6134	5.92236	7.5	2	2	0.949531	1.03334	1.03345	1.00544	0.93499	1.03025	0.983609	0.982949	0.977633	0.597003
645007799	PREDICTED: protein arginine N-methyltransferase 1-like [Nasonia vitripennis]	34.9002	4.88135	32.89	1	8	0.91668	1.05782	0.989276	0.987927	0.968311	1.04288	1.03347	1.01489	1.02729	0.597024
345495118	PREDICTED: ubiquitin carboxyl-terminal hydrolase isozyme L3 [Nasonia vitripennis]	25.4908	5.03369	18.58	1	5	0.81157	1.10269	1.01608	0.97678	0.99309	1.06072	1.02873	1.02751	1.05194	0.597101
345495562	PREDICTED: HEAT repeat-containing protein 1 [Nasonia vitripennis]	235.457	6.41748	0.68	1	1	1.10731	0.981286	0.860166	0.98292	1.00752	1.0767	0.994833	1.02635	1.04418	0.597102
156553815	PREDICTED: RNA-binding protein 8A [Nasonia vitripennis]	18.6574	5.49072	22.42	1	4	0.998726	0.966909	1.00777	0.991134	0.983785	1.02009	0.997549	1.00047	1.00942	0.597178
345493847	PREDICTED: transmembrane 9 superfamily member 2 isoform X2 [Nasonia vitripennis]	75.5993	7.88428	4.85	2	2	1.12929	0.997753	0.931869	1.01964	0.978337	1.0643	0.88135	0.974661	0.955889	0.597285
156549887	PREDICTED: eukaryotic translation initiation factor 1A, X-chromosomal isoform X1 [Nasonia vitripennis]	16.9114	5.05908	24.49	2	5	0.79053	1.08793	0.970989	0.949815	0.925388	1.04164	1.04578	1.00427	1.05733	0.597461
156547587	PREDICTED: GMP reductase 1-like isoform X1 [Nasonia vitripennis]	37.7329	8.04541	17.82	2	5	1.12639	0.968088	0.984691	1.02639	1.01484	0.967828	1.00682	0.996495	0.970872	0.598076
156546831	PREDICTED: splicing factor 3B subunit 6-like protein [Nasonia vitripennis]	14.6256	9.29053	20.8	2	2	0.94289	1.0585	0.962251	0.987881	1.06569	1.0253	0.955251	1.01541	1.02787	0.598082
645010259	PREDICTED: 60S ribosomal protein L18a-like isoform X1 [Nasonia vitripennis]	20.8102	10.5356	33.33	2	1	1.14826	0.917016	1.00147	1.02225	0.997876	1.0418	0.886934	0.975535	0.954304	0.598403
156553048	PREDICTED: ras suppressor protein 1 [Nasonia vitripennis]	32.268	6.81494	24.74	1	5	1.05927	0.998001	0.995368	1.01755	1.01019	0.900211	1.05554	0.988648	0.9716	0.598621
644996522	PREDICTED: E3 ubiquitin-protein ligase HECTD1 isoform X3 [Nasonia vitripennis]	281.663	5.41455	0.54	2	1	1.43022	0.937885	0.85805	1.07538	1.14956	0.903287	0.823996	0.958949	0.891727	0.598694
345485051	PREDICTED: uncharacterized protein LOC100679082 [Nasonia vitripennis]	16.1266	5.33838	8.97	1	1	0.894727	1.14994	0.877671	0.974114	1.03155	1.07137	0.977253	1.02672	1.05401	0.598715
227473901	unnamed protein product [Nasonia vitripennis]	152	7.02002	3.53	2	2	1.32895	0.856928	0.981608	1.05583	1.08514	0.993034	0.811223	0.963133	0.912204	0.598989
645035367	PREDICTED: methylglutaconyl-CoA hydratase, mitochondrial [Nasonia vitripennis]	32.2086	9.02686	39.87	1	12	0.91687	1.12589	0.902819	0.981859	0.990688	1.01243	1.07276	1.02529	1.04423	0.599145
156551301	PREDICTED: fatty acyl-CoA reductase 1-like [Nasonia vitripennis]	60.6416	7.00537	26.73	1	12	0.989881	1.00484	0.948842	0.981189	1.19459	0.966037	0.927975	1.02953	1.04927	0.599602
156538923	PREDICTED: muscle-specific protein 20-like [Nasonia vitripennis]	20.4515	8.36768	74.73	1	12	0.922931	0.988762	1.03119	0.980962	0.928189	1.04755	1.05563	1.01046	1.03007	0.599934
156536951	PREDICTED: 60S ribosomal protein L21 [Nasonia vitripennis]	18.2202	10.7847	45.28	1	7	0.874465	1.04392	0.968731	0.962373	0.986743	1.0077	0.977676	0.990707	1.02944	0.599973
645012966	PREDICTED: vacuolar protein sorting-associated protein VTA1 homolog isoform X2 [Nasonia vitripennis]	33.6488	5.94775	15.69	2	4	1.00264	0.911093	1.04693	0.986886	0.927312	1.0959	1.0466	1.02327	1.03687	0.600427
156546946	PREDICTED: CD2 antigen cytoplasmic tail-binding protein 2 homolog isoform X3 [Nasonia vitripennis]	39.1137	4.84326	5.29	1	1	0.983306	1.01296	0.968762	0.988343	1.09668	0.897568	1.08198	1.02541	1.0375	0.600993
645012747	PREDICTED: protein rogdi isoform X2 [Nasonia vitripennis]	30.3695	7.79639	16.29	3	3	1.08256	0.937648	1.08223	1.03415	0.961242	0.903891	1.10617	0.990435	0.957731	0.601234
645010140	PREDICTED: tyrosine-protein phosphatase Lar isoform X2 [Nasonia vitripennis]	214.945	6.68311	0.74	2	1	1.16172	0.854625	1.11043	1.04226	0.897321	0.947758	1.09224	0.979105	0.939406	0.601387
645018206	PREDICTED: papilin-like isoform X2 [Nasonia vitripennis]	15.1844	9.5249	13.53	2	2	0.867723	1.03719	1.03476	0.979892	0.963298	1.07512	1.01121	1.01654	1.0374	0.601727
156547842	PREDICTED: 60S ribosomal protein L26 [Nasonia vitripennis]	17.2264	10.7554	40.54	1	8	0.805591	1.07246	1.02215	0.966733	0.918856	1.04119	1.10763	1.02256	1.05775	0.602187
345493435	PREDICTED: putative sodium-dependent multivitamin transporter [Nasonia vitripennis]	65.8331	8.27979	2.67	1	1	0.908401	1.22026	0.960018	1.02956	0.964446	1.0149	0.941674	0.973674	0.945719	0.602222
197245421	Nucleolar protein at 60B homolog [Nasonia vitripennis]	58.3053	8.99756	4.63	1	3	0.948112	1.0009	0.970288	0.973099	0.917453	1.02755	1.04749	0.997497	1.02507	0.602661
645012101	PREDICTED: LOW QUALITY PROTEIN: WD repeat and FYVE domain-containing protein 3 [Nasonia vitripennis]	384.915	6.87354	0.96	1	2	1.40078	0.701578	1.02369	1.04202	0.97735	0.950577	0.850013	0.92598	0.888641	0.602866
289177094	carboxylesterase clade A, member 5 [Nasonia vitripennis]	60.4706	6.16357	12.87	1	5	0.919421	1.04122	1.01856	0.993064	1.04037	0.991865	1.01434	1.01553	1.02262	0.603863
156551309	PREDICTED: enolase-phosphatase E1-like [Nasonia vitripennis]	70.9498	4.70361	7.04	1	3	0.865188	1.11364	0.922268	0.967031	0.97867	1.0379	1.01455	1.01037	1.04482	0.603958
645028804	PREDICTED: EH domain-containing protein 1 [Nasonia vitripennis]	96.0006	7.78174	30.37	1	23	0.992603	1.02908	0.971288	0.997656	1.00885	0.986011	1.03526	1.01004	1.01241	0.604667
644998041	PREDICTED: cuticular protein analogous to peritrophins 3-E isoform X1 [Nasonia vitripennis]	39.4211	5.8208	10.76	2	3	1.0716	0.954554	0.979816	1.00199	1.03929	0.983415	0.887799	0.970168	0.968242	0.604926
645037786	PREDICTED: peripheral plasma membrane protein CASK isoform X3 [Nasonia vitripennis]	100.086	5.8208	5.21	3	5	1.10087	0.885045	1.10279	1.02957	0.976728	0.931275	1.04669	0.984899	0.956614	0.604979
156544003	PREDICTED: ragulator complex protein LAMTOR3-A [Nasonia vitripennis]	13.48	7.40088	29.84	1	3	1.01263	0.91153	1.03204	0.985398	1.03297	0.997493	0.992108	1.00752	1.02245	0.605222
645006941	PREDICTED: nuclear migration protein nudC isoform X2 [Nasonia vitripennis]	38.1194	5.16064	24.33	2	8	0.902492	1.10349	0.976966	0.994318	1.02752	1.03371	1.02034	1.02719	1.03306	0.605946
289063438	glutathione S-transferase D1 [Nasonia vitripennis]	24.4715	8.27979	72.56	2	14	0.956885	1.05296	1.028	1.01261	0.993345	0.990416	1.00522	0.996328	0.983918	0.606009
645015583	PREDICTED: 60S ribosomal protein L31 [Nasonia vitripennis]	14.4349	10.5503	38.71	1	5	1.04384	0.895311	1.10243	1.01386	0.963873	0.943575	1.02329	0.976912	0.963555	0.606075
345492058	PREDICTED: 26S protease regulatory subunit 6B isoform X2 [Nasonia vitripennis]	46.6321	5.70654	41.5	2	14	0.934476	1.05701	0.974065	0.988516	0.975567	1.01623	1.0425	1.01143	1.02318	0.606143
645033087	PREDICTED: F-actin-capping protein subunit beta isoform X2 [Nasonia vitripennis]	30.1101	6.1001	19.4	2	4	1.0478	1.01107	0.986499	1.01512	0.98241	1.04713	0.964186	0.997907	0.983041	0.606351
156547659	PREDICTED: dehydrogenase/reductase SDR family member 11-like [Nasonia vitripennis]	27.1684	7.48877	12.15	1	1	0.792516	1.13751	0.986665	0.972229	1.04579	0.997317	1.04279	1.02863	1.05801	0.606588
345490168	PREDICTED: protein argonaute-2-like [Nasonia vitripennis]	25.5606	7.56201	12.89	1	2	1.13512	0.977814	0.978051	1.03033	0.968245	0.896564	1.0953	0.986704	0.95766	0.606881
645019854	PREDICTED: delta-1-pyrroline-5-carboxylate synthase isoform X2 [Nasonia vitripennis]	86.8009	7.03467	41.5	3	28	1.01258	1.02905	0.901886	0.98117	1.19222	0.947741	0.953658	1.03121	1.051	0.607407
645004279	PREDICTED: mucin-22 isoform X7 [Nasonia vitripennis]	123.196	5.73193	2.09	2	2	1.47391	0.792998	0.900616	1.05584	1.01451	0.944276	0.846633	0.935139	0.885681	0.60748
644999942	PREDICTED: uncharacterized protein LOC100124120 [Nasonia vitripennis]	29.0996	9.15869	6.75	1	1	1.0803	0.922772	0.966897	0.989989	1.10108	0.98069	0.989675	1.02381	1.03417	0.607802
156542821	PREDICTED: GTP-binding protein 128up [Nasonia vitripennis]	41.084	8.83643	24.25	1	7	0.94996	1.06937	0.938097	0.98581	0.999241	1.02357	1.00558	1.00947	1.024	0.607893
345498384	PREDICTED: arrestin homolog [Nasonia vitripennis]	46.0828	8.60205	30.92	1	12	0.930635	0.99297	1.05423	0.992612	0.980627	1.01102	1.05598	1.01588	1.02344	0.607984
345492206	PREDICTED: 60S ribosomal protein L27 [Nasonia vitripennis]	15.9199	10.5942	41.79	1	6	0.95267	0.973608	1.06007	0.99545	0.979738	0.982718	1.11708	1.02651	1.0312	0.608445
156541662	PREDICTED: sulfhydryl oxidase 2 [Nasonia vitripennis]	72.2611	7.06396	2.7	1	1	0.936658	0.932103	1.05121	0.973323	0.919141	0.945604	1.23645	1.03373	1.06207	0.608512
345487692	PREDICTED: serine/threonine-protein kinase Genghis Khan isoform X2 [Nasonia vitripennis]	203.016	6.45557	1.39	2	2	0.945651	1.11275	1.01271	1.0237	1.09198	0.985614	0.852913	0.976835	0.954216	0.60864
645025975	PREDICTED: disks large homolog 5 isoform X4 [Nasonia vitripennis]	211.304	8.27979	0.58	3	1	0.963032	0.923761	1.2035	1.0301	0.97942	0.991387	0.973818	0.981542	0.952863	0.608881
156548598	PREDICTED: V-type proton ATPase 116 kDa subunit a isoform 1 isoform X6 [Nasonia vitripennis]	96.7054	6.53662	22.41	5	1	1.28453	0.869091	0.994745	1.04945	1.06541	0.936463	0.929639	0.97717	0.931122	0.60966
156548528	PREDICTED: myosin light chain alkali [Nasonia vitripennis]	16.8494	4.56396	63.33	1	9	0.979183	0.978371	1.06863	1.00873	0.983728	0.999548	0.992654	0.991977	0.983393	0.609799
644998566	PREDICTED: 60S ribosomal protein L28 [Nasonia vitripennis]	16.8464	11.312	39.46	1	7	0.93569	1.06719	1.00239	1.00176	0.988956	0.991192	1.12104	1.03373	1.03192	0.609937
156552237	PREDICTED: nucleoporin Nup37-like [Nasonia vitripennis]	36.3716	6.12549	24.53	1	6	1.10969	0.931294	1.00021	1.01373	1.00515	0.981805	0.966107	0.984352	0.971021	0.609982
156538062	PREDICTED: lysozyme c-1-like [Nasonia vitripennis]	20.4309	5.07178	22.28	1	3	0.955485	1.02391	1.07754	1.01898	1.00211	0.875123	1.06882	0.982018	0.963728	0.610011
645022670	PREDICTED: electron transfer flavoprotein subunit alpha, mitochondrial [Nasonia vitripennis]	34.9977	8.03076	67.66	1	20	0.985539	0.979955	1.01928	0.994923	1.0018	0.982099	1.03243	1.00545	1.01058	0.611249
645002150	PREDICTED: thioredoxin-like protein 1 isoform X2 [Nasonia vitripennis]	27.8476	5.35107	25.1	2	5	0.980995	1.01543	0.98668	0.994368	1.07944	0.945997	1.02395	1.01646	1.02222	0.611373
645006974	PREDICTED: ATP-dependent RNA helicase Ddx1 isoform X2 [Nasonia vitripennis]	81.6436	7.12256	17.88	2	10	0.983731	0.945262	1.01962	0.982872	0.992299	0.990839	1.00131	0.994817	1.01215	0.611608
645038661	PREDICTED: signal peptidase complex catalytic subunit SEC11C-like, partial [Nasonia vitripennis]	14.5285	6.93213	44.88	1	1	0.834824	1.06366	1.18656	1.02835	0.992898	0.786419	1.08255	0.953957	0.92766	0.611722
645039149	PREDICTED: ranBP2-like and GRIP domain-containing protein 3 [Nasonia vitripennis]	321.25	6.32861	5.95	1	13	1.08605	0.950179	1.04812	1.02812	1.04301	0.982584	0.984416	1.00334	0.975895	0.611745
156542261	PREDICTED: uncharacterized protein LOC100117405 [Nasonia vitripennis]	35.1902	6.65381	18.47	1	6	0.885613	0.930058	1.10974	0.975136	1.0793	0.926747	1.05682	1.02096	1.04699	0.611944
288856313	cytochrome b-c1 complex subunit 2, mitochondrial [Nasonia vitripennis]	46.9283	8.77783	63.72	1	23	0.995771	0.975291	1.0678	1.01296	0.981791	0.998975	1.00996	0.996909	0.984158	0.612189
645016205	PREDICTED: uncharacterized oxidoreductase C115.03-like [Nasonia vitripennis]	43.7992	8.07471	51.67	1	18	0.816103	0.988776	1.33148	1.04545	0.962623	0.93157	0.991335	0.961842	0.920024	0.612515
645004010	PREDICTED: glycerophosphodiester phosphodiesterase domain-containing protein 1-like isoform X2 [Nasonia vitripennis]	34.3251	8.96826	5.84	2	1	1.02105	1.02108	1.0153	1.01914	1.05522	1.02706	0.892543	0.991607	0.972981	0.612727
645020670	PREDICTED: actin-binding LIM protein 2-like isoform X4 [Nasonia vitripennis]	92.0148	8.5874	14.72	2	1	1.37901	0.868348	0.928619	1.05866	0.998697	1.00854	0.897431	0.968222	0.914573	0.612738
645003290	PREDICTED: thymidylate kinase [Nasonia vitripennis]	27.7015	7.84033	13.65	1	3	0.972553	1.07266	1.02579	1.02367	1.0365	0.963615	1.01181	1.00397	0.980761	0.613193
645026299	PREDICTED: replication protein A 70 kDa DNA-binding subunit-like [Nasonia vitripennis]	64.1095	6.39209	14.36	1	7	0.869829	1.11783	0.930915	0.972859	0.99399	1.08026	0.977477	1.01724	1.04562	0.613385
644994811	PREDICTED: alpha-tubulin N-acetyltransferase-like isoform X3 [Nasonia vitripennis]	31.5398	9.11475	16.97	3	4	1.12025	0.937237	0.997395	1.0183	0.989899	0.99823	0.977849	0.988659	0.970897	0.613472
645025550	PREDICTED: protein phosphatase 1 regulatory subunit 7 [Nasonia vitripennis]	36.7454	5.07178	32.39	1	8	0.922835	0.972724	1.03907	0.978209	0.983182	1.02034	0.989363	0.997627	1.01985	0.614181
156542863	PREDICTED: 40S ribosomal protein S4 [Nasonia vitripennis]	29.5861	10.3013	56.11	1	15	0.937428	1.04279	0.997509	0.992577	0.989932	1.01662	1.02388	1.01014	1.0177	0.61452
156546162	PREDICTED: multidrug resistance-associated protein 4-like [Nasonia vitripennis]	143.616	8.26514	3.13	2	2	1.11517	1.00881	0.938356	1.02078	0.997733	1.00241	0.977195	0.992445	0.972243	0.614612
645003798	PREDICTED: myosin heavy chain, muscle isoform X8 [Nasonia vitripennis]	224.282	5.94775	68.84	7	1	1.09167	0.929325	1.06722	1.02941	0.959575	0.949331	1.07399	0.9943	0.965896	0.614755
345485274	PREDICTED: carboxypeptidase B-like [Nasonia vitripennis]	46.8249	6.46826	16.36	1	7	1.04371	1.07013	1.02663	1.04682	0.83801	1.13315	1.02699	0.999385	0.954684	0.615464
645029503	PREDICTED: ubiquinone biosynthesis monooxygenase COQ6 [Nasonia vitripennis]	52.4086	8.00146	2.08	1	1	1.41544	0.796867	0.987654	1.06665	1.05487	0.976959	0.85557	0.962466	0.902323	0.615942
156551402	PREDICTED: 28S ribosomal protein S15, mitochondrial [Nasonia vitripennis]	31.6919	9.24658	8.55	1	2	0.904813	1.11575	0.904722	0.975095	0.931579	1.05233	1.07737	1.02042	1.04649	0.616031
345489892	PREDICTED: nucleolysin TIA-1 isoform p40-like [Nasonia vitripennis]	23.27	8.70459	10.05	1	2	1.03703	0.948257	1.06651	1.01727	0.934384	1.05092	0.986727	0.990679	0.973863	0.616049
345496054	PREDICTED: putative leucine-rich repeat-containing protein DDB_G0290503 [Nasonia vitripennis]	100.747	4.42432	8.67	1	7	1.00995	0.983684	0.996049	0.996561	0.973884	0.993187	1.07408	1.01372	1.01721	0.616209
645006244	PREDICTED: RNA polymerase II-associated factor 1 homolog [Nasonia vitripennis]	64.7307	8.27979	3.15	2	1	1.17564	0.889705	1.03093	1.03209	0.997863	0.988185	0.975473	0.987174	0.956479	0.616288
644998064	PREDICTED: carboxylesterase clade A, member 6 isoform X2 [Nasonia vitripennis]	58.7757	6.27783	26.38	3	11	1.08622	0.95954	1.00888	1.01821	0.982275	1.00379	1.00726	0.997775	0.979926	0.616358
645006577	PREDICTED: ATP-binding cassette sub-family G member 4 isoform X2 [Nasonia vitripennis]	77.9834	8.74854	6.47	2	4	1.051	0.987805	0.90287	0.980557	1.05294	0.993717	0.974468	1.00704	1.02701	0.617426
645004810	PREDICTED: extended synaptotagmin-1 [Nasonia vitripennis]	97.5854	6.18896	11.85	1	10	0.95443	0.971081	1.03916	0.988223	0.988904	0.985132	1.04222	1.00542	1.0174	0.617442
644997257	PREDICTED: titin isoform X1 [Nasonia vitripennis]	1138.23	5.5415	34.7	8	258	0.977332	0.998554	1.01528	0.997057	1.00878	0.991451	1.01144	1.00389	1.00685	0.617531
645036988	PREDICTED: dihydrolipoyllysine-residue acetyltransferase component of pyruvate dehydrogenase complex, mitochondrial isoform X3 [Nasonia vitripennis]	52.0683	8.86572	47.85	2	18	1.02748	0.953854	1.04237	1.0079	0.980279	0.97747	1.01701	0.991586	0.983814	0.617532
645001091	PREDICTED: uncharacterized protein LOC100116034 isoform X2 [Nasonia vitripennis]	41.5294	6.21436	2.2	2	1	0.954307	1.05236	1.11143	1.03937	0.926574	0.8343	1.17602	0.978966	0.941887	0.617936
156537001	PREDICTED: V-type proton ATPase subunit e 2-like [Nasonia vitripennis]	9.92817	8.71924	13.64	1	1	0.922808	0.98466	1.02922	0.978895	0.968524	1.2064	0.915007	1.02998	1.05218	0.6183
345497398	PREDICTED: nuclear pore complex protein Nup205, partial [Nasonia vitripennis]	192.858	6.46826	7.44	1	8	1.02846	0.950283	1.05962	1.01279	0.998261	0.99089	0.996532	0.995228	0.98266	0.618642
645015621	PREDICTED: battenin [Nasonia vitripennis]	44.2246	5.98584	5.46	1	1	1.00296	0.915293	1.04404	0.987432	1.11107	0.973965	0.97339	1.01947	1.03245	0.618723
156545523	PREDICTED: bifunctional ATP-dependent dihydroxyacetone kinase/FAD-AMP lyase (cyclizing)-like [Nasonia vitripennis]	61.6238	6.41748	7.12	1	3	1.0453	0.851446	1.04952	0.98209	0.993989	0.933773	0.904722	0.944161	0.96138	0.618754
229577383	ATP synthase subunit beta, mitochondrial [Nasonia vitripennis]	55.1471	5.22412	78.14	1	27	1.01088	0.952366	1.08971	1.01765	0.993546	0.987778	1.00681	0.996043	0.978767	0.619333
645012044	PREDICTED: uncharacterized protein LOC100678240 isoform X5 [Nasonia vitripennis]	132.172	9.11475	0.77	5	1	1.07902	0.818925	1.03849	0.978811	1.15527	0.890556	1.07181	1.03921	1.06171	0.619484
645019505	PREDICTED: transcriptional activator protein Pur-beta isoform X2 [Nasonia vitripennis]	35.9697	8.04541	34.66	4	11	1.0242	0.914282	1.00128	0.979923	1.02194	0.987622	0.987224	0.998928	1.01939	0.61985
644996288	PREDICTED: proton-coupled amino acid transporter 1 [Nasonia vitripennis]	55.8093	7.26904	11.46	1	4	1.01064	1.04864	0.934667	0.997979	1.08312	0.995864	0.987903	1.0223	1.02437	0.619912
156544887	PREDICTED: myophilin [Nasonia vitripennis]	20.7213	8.30908	65.43	1	9	0.976131	1.07803	0.888251	0.980804	1.00205	1.06149	0.975911	1.01315	1.03298	0.62067
345482357	PREDICTED: protein GPR107 isoform X2 [Nasonia vitripennis]	66.6911	7.32764	2.08	2	1	1.00885	0.954109	1.09572	1.01956	1.03748	0.959575	0.985991	0.994348	0.975269	0.621144
645031817	PREDICTED: acetylcholinesterase [Nasonia vitripennis]	80.4061	6.60986	5.96	1	3	1.02909	1.03338	0.938407	1.00029	1.02557	0.993812	0.905489	0.974955	0.97467	0.621496
645016907	PREDICTED: AMP deaminase 2 isoform X5 [Nasonia vitripennis]	84.59	5.99854	10.63	6	6	0.979545	1.01487	1.03295	1.00912	0.960783	1.03241	0.992532	0.995242	0.986247	0.621612
644996207	PREDICTED: cytosolic non-specific dipeptidase [Nasonia vitripennis]	53.348	6.15088	40.67	1	17	0.95331	1.05069	0.976076	0.993359	0.996241	1.00539	1.02779	1.00981	1.01656	0.622323
645021294	PREDICTED: formin-like protein 7 [Nasonia vitripennis]	20.6438	7.56201	22.78	1	3	0.976408	0.918492	1.01862	0.971174	0.968618	0.999746	0.994009	0.987458	1.01677	0.622361
645005610	PREDICTED: regulator of microtubule dynamics protein 1-like [Nasonia vitripennis]	41.3666	5.85889	3.61	1	1	1.17887	0.993806	0.922739	1.0318	1.03903	0.948997	0.978321	0.988783	0.958305	0.622673
345490434	PREDICTED: dnaJ homolog subfamily C member 30-like [Nasonia vitripennis]	26.1865	9.68604	11.56	1	2	0.918345	1.05575	0.996795	0.990295	0.984765	1.04393	1.01137	1.01336	1.02329	0.622682
644996679	PREDICTED: protein sly1 homolog [Nasonia vitripennis]	64.1528	6.7417	19.22	1	9	0.983217	1.02747	0.98254	0.997742	0.993945	1.0034	0.966186	0.987845	0.99008	0.622695
644995400	PREDICTED: sarcalumenin isoform X1 [Nasonia vitripennis]	98.1501	4.31006	20.9	2	16	1.04693	0.939196	1.06334	1.01649	0.99667	0.958797	1.02478	0.993417	0.977303	0.622967
156543350	PREDICTED: translation machinery-associated protein 7 homolog isoform X2 [Nasonia vitripennis]	6.90187	9.99365	29.69	2	2	0.85097	1.08198	0.994173	0.975708	0.924631	1.06947	1.06422	1.01944	1.04482	0.623511
645032081	PREDICTED: nucleolysin TIAR isoform X5 [Nasonia vitripennis]	41.5789	6.93213	7.67	5	2	1.15834	0.94854	0.980389	1.02909	1.01306	1.05566	0.886979	0.985233	0.957382	0.623626
645034635	PREDICTED: stomatin-like protein 2, mitochondrial [Nasonia vitripennis]	42.242	6.56592	28.31	1	8	1.00945	0.982304	1.03375	1.0085	1.01567	0.971561	1.00639	0.997875	0.989462	0.623754
156551611	PREDICTED: histone H4-like [Nasonia vitripennis]	11.3324	11.3999	50.49	2	1	0.99292	0.966298	1.1067	1.02197	1.02588	0.895521	1.04345	0.988284	0.967035	0.623763
156538877	PREDICTED: 39S ribosomal protein L20, mitochondrial [Nasonia vitripennis]	17.3966	10.8286	7.48	1	1	0.964951	0.983436	0.978874	0.975754	0.925345	1.19811	0.944079	1.02251	1.04792	0.623862
345488771	PREDICTED: transketolase isoform X2 [Nasonia vitripennis]	67.3039	7.60596	56.27	1	2	0.849726	1.09384	0.980428	0.974664	1.01399	1.02983	0.993584	1.01247	1.03879	0.624038
645004769	PREDICTED: helicase domino [Nasonia vitripennis]	456.577	8.71924	0.36	1	1	0.894048	1.08391	1.122	1.03332	0.786007	1.0623	1.0664	0.971568	0.940238	0.624213
645016780	PREDICTED: uncharacterized protein LOC100123381 isoform X2 [Nasonia vitripennis]	48.7729	5.10986	3.9	2	1	1.40256	0.839819	0.9498	1.06406	1.05028	0.891838	0.966822	0.969647	0.911271	0.624245
156537211	PREDICTED: purine nucleoside phosphorylase-like isoform X3 [Nasonia vitripennis]	36.164	6.78564	43.65	3	10	1.183	0.901478	1.01598	1.03349	1.04669	0.998218	0.911243	0.985384	0.953455	0.624442
156547387	PREDICTED: serine/threonine-protein phosphatase 4 regulatory subunit 1-like isoform X1 [Nasonia vitripennis]	104.746	5.08447	4.83	2	3	1.10695	0.945516	1.00135	1.01794	0.981221	0.947158	1.03903	0.989137	0.971707	0.624542
156543342	PREDICTED: 60S acidic ribosomal protein P0 [Nasonia vitripennis]	33.9478	6.27783	55.7	1	14	0.888407	1.04738	1.00742	0.981069	0.958834	1.09871	0.987366	1.01497	1.03455	0.624547
645005957	PREDICTED: pantothenate kinase 3 isoform X3 [Nasonia vitripennis]	44.0736	6.27783	3.74	3	1	1.29166	0.855467	1.01435	1.05383	1.0863	0.852172	0.993582	0.977352	0.927429	0.62463
644992191	PREDICTED: potassium voltage-gated channel protein Shal isoform X3 [Nasonia vitripennis]	66.0645	8.36768	2.55	3	1	1.41336	0.796108	0.96964	1.0597	1.03264	1.00439	0.834118	0.957049	0.903129	0.624646
644998421	PREDICTED: apyrase isoform X2 [Nasonia vitripennis]	55.1526	8.06006	4.04	2	1	1.00554	0.818153	1.10911	0.977601	1.02506	1.10248	0.955881	1.02781	1.05136	0.625456
229577287	alpha-glucosidase-like precursor [Nasonia vitripennis]	65.7382	6.88818	13.37	1	4	0.895599	0.890626	1.10075	0.962326	0.89329	1.04394	1.09546	1.01089	1.05047	0.625633
345495521	PREDICTED: RNA-binding protein fusilli isoform X1 [Nasonia vitripennis]	88.5255	6.91748	2.2	1	1	1.3654	0.820856	0.984553	1.05694	0.992011	0.965516	0.95752	0.971682	0.919339	0.625805
645021081	PREDICTED: mitochondrial import receptor subunit TOM40 homolog 1 [Nasonia vitripennis]	35.0677	7.51807	37.92	1	8	1.00893	0.984924	0.985486	0.993113	0.983062	1.00631	1.00774	0.999038	1.00597	0.626268
644999597	PREDICTED: cyclin-G-associated kinase isoform X2 [Nasonia vitripennis]	125.804	6.82959	4.05	2	3	1.30468	0.8523	0.965129	1.0407	1.01742	0.93236	0.953786	0.967854	0.93	0.626293
288856315	cytochrome b-c1 complex subunit Rieske, mitochondrial [Nasonia vitripennis]	29.8477	9.36377	61.82	1	14	1.07003	0.900403	1.07667	1.0157	0.99934	0.969494	0.986213	0.985016	0.969787	0.626613
240255403	NADH dehydrogenase [ubiquinone] iron-sulfur protein 5 [Nasonia vitripennis]	11.8558	7.72314	27.45	1	3	0.967337	0.979892	1.06645	1.00456	0.96127	0.993317	1.00569	0.98676	0.982281	0.626811
645038115	PREDICTED: proteasome subunit beta type-2-like [Nasonia vitripennis]	23.3568	7.51807	43.96	1	8	1.01122	0.965781	0.976888	0.984629	1.00486	0.987555	0.985092	0.992503	1.008	0.627932
645006300	PREDICTED: RNA-binding protein Rsf1-like [Nasonia vitripennis]	17.8635	9.51025	5.39	1	1	0.858885	1.06823	1.00692	0.978012	0.913264	1.08935	1.06145	1.02135	1.04432	0.628095
156539833	PREDICTED: MD-2-related lipid-recognition protein-like, partial [Nasonia vitripennis]	14.6854	8.14795	53.91	1	7	0.987466	1.01632	1.04847	1.01742	0.923544	1.07039	0.986191	0.993373	0.976365	0.629092
645017816	PREDICTED: cullin-4A [Nasonia vitripennis]	94.2347	8.52881	10.8	1	8	1.02813	1.02301	0.926696	0.992611	1.04499	0.993446	0.997198	1.01188	1.01941	0.629407
644995705	PREDICTED: LOW QUALITY PROTEIN: probable citrate synthase 2, mitochondrial [Nasonia vitripennis]	51.1219	9.49561	55.29	1	22	1.00788	0.92524	1.09733	1.01015	0.975716	0.975802	1.0002	0.983906	0.974018	0.629735
345487216	PREDICTED: LOW QUALITY PROTEIN: DNA-directed RNA polymerase II subunit RPB1 [Nasonia vitripennis]	210.143	7.54736	3.04	1	4	1.16685	0.947873	0.993062	1.03593	1.06448	0.948677	0.976949	0.996704	0.962134	0.62994
156546693	PREDICTED: uncharacterized protein LOC100120643 [Nasonia vitripennis]	24.3738	9.61279	6.51	1	1	0.937133	1.05863	0.97178	0.989182	1.02098	0.94107	1.095	1.01902	1.03016	0.629992
645014688	PREDICTED: splicing factor 1-like [Nasonia vitripennis]	72.8488	9.08545	6.95	1	3	1.38573	0.888813	0.933909	1.06948	1.03218	0.997626	0.926476	0.985426	0.921403	0.630577
345494826	PREDICTED: dihydropyrimidinase isoform X1 [Nasonia vitripennis]	66.7933	6.45557	30.18	1	1	0.847045	1.09544	1.00502	0.982504	1.02943	1.01611	1.01499	1.02017	1.03834	0.631839
345496466	PREDICTED: innexin inx3 [Nasonia vitripennis]	44.7308	8.1626	10.1	1	4	1.10224	0.948445	0.990594	1.01376	1.01298	0.96844	0.985862	0.989093	0.975669	0.632198
645015342	PREDICTED: mitochondrial import inner membrane translocase subunit Tim8 [Nasonia vitripennis]	10.8304	7.97217	18.95	1	2	1.05055	0.92641	1.02514	1.0007	1.024	1.00265	0.887166	0.971273	0.970593	0.632446
645025085	PREDICTED: UPF0160 protein MYG1, mitochondrial isoform X2 [Nasonia vitripennis]	37.613	6.20166	25.15	2	6	1.10417	0.978762	0.966929	1.01662	1.01783	1.01677	0.934948	0.98985	0.973667	0.632452
156539529	PREDICTED: probable isocitrate dehydrogenase [NAD] subunit alpha, mitochondrial [Nasonia vitripennis]	39.2951	7.38623	61	1	20	0.996907	0.985518	1.06219	1.01487	0.989091	0.996634	1.01929	1.00167	0.986993	0.632658
289177090	carboxylesterase clade A, member 3 [Nasonia vitripennis]	59.3343	7.00537	5.65	1	2	0.903398	0.959349	1.21741	1.02672	0.883197	1.03764	0.993432	0.971424	0.946146	0.632745
156549484	PREDICTED: uncharacterized protein LOC100120803 [Nasonia vitripennis]	53.4828	5.2876	4.19	1	1	1.01854	0.962568	1.00076	0.993956	1.03172	1.06302	0.946724	1.01382	1.01999	0.632811
645020875	PREDICTED: NEDD8-activating enzyme E1 regulatory subunit [Nasonia vitripennis]	60.3386	5.18604	16.54	1	5	0.978149	1.05446	0.941905	0.991505	0.989093	1.10004	0.967209	1.01878	1.02751	0.632887
288856263	NADH dehydrogenase (ubiquinone) 1 alpha subcomplex, 9, 39kDa [Nasonia vitripennis]	46.1516	8.60205	51.6	1	15	1.02338	0.945997	1.08233	1.01723	0.996474	0.965852	1.02319	0.995172	0.97831	0.633458
345496012	PREDICTED: ABC transporter G family member 23 [Nasonia vitripennis]	85.4608	6.7417	19.01	1	11	0.952979	1.03081	1.0136	0.999128	0.981203	1.02764	0.932607	0.980482	0.981337	0.633557
645006642	PREDICTED: LOW QUALITY PROTEIN: 5-oxoprolinase [Nasonia vitripennis]	139.711	7.03467	13.68	1	15	1.03442	0.982642	1.01471	1.01059	1.03636	0.99467	0.959107	0.996713	0.986267	0.633665
345493944	PREDICTED: transmembrane protein 63B isoform X2 [Nasonia vitripennis]	83.9742	8.71924	3.03	2	2	0.986309	0.956372	1.03227	0.99165	1.02348	1.07139	0.945981	1.01362	1.02215	0.63395
345494828	PREDICTED: elongation of very long chain fatty acids protein AAEL008004-like [Nasonia vitripennis]	31.4332	9.53955	6.06	1	1	0.883935	1.13052	0.896046	0.970166	1.11375	1.08342	0.880606	1.02592	1.05747	0.63474
645032618	PREDICTED: arginine kinase isoform X1 [Nasonia vitripennis]	41.5849	6.1001	64.88	2	2	1.00772	1.04688	0.986003	1.01353	0.906683	1.0253	1.0385	0.99016	0.976939	0.634834
[truncated: 1,097 more rows]

## Sheet: Basic information statistics
Total spectra	279080
Spectra（PSM）	63965
Peptides	23546
Unique peptides	22946
Protein groups	3109
